## **State- and County-Level COVID-19 Public Health Orders in California: Constructing a Dataset and Describing Their Timing, Content, and Stricture**

Jeremy D. Goldhaber-Fiebert (1), Alexander F. Holsinger (1,2), Erin Holsinger (1), Elizabeth Long (1) on behalf of the SC-COSMO Modeling Consortium  
January 10, 2021

- (1) Stanford Health Policy, Centers for Health Policy and Primary Care and Outcomes Research, Stanford University School of Medicine and the Freeman Spogli Institute of International Studies, Stanford, CA, USA
- (2) University of Texas at Austin, Austin, TX, USA

### **Abstract**

Without vaccines, non-pharmaceutical interventions have been the most widely used approach to controlling the spread of COVID-19 epidemics. Various jurisdictions have implemented public health orders as a means of reducing effective contacts and controlling their local epidemics. Multiple studies have examined the effectiveness of various orders (e.g. use of face masks) for epidemic control. However, orders occur at different timings across jurisdictions and some orders on the same topic are stricter than others. We constructed a county-level longitudinal data set of more than 1,800 public health orders issues by California and its 58 counties pertaining to its 40 million residents. First, we describe methods used to construct the dataset that enables the characterization of the evolution over time of California state- and county-level public health orders dealing with COVID-19 from January 1, 2020 through December 31, 2020. Public health orders are both an interesting and important outcome in their own right and also a key input into analyses looking at how such orders may impact COVID-19 epidemics. To construct the dataset, we developed and executed a search strategy to identify COVID-19 public health orders over this time period for all relevant jurisdictions. We characterized each identified public health order in terms of the timing of when it was announced, went into effect and (potentially) expired. We also adapted an existing schema to describe the topic(s) each public health order dealt with and the level of stricture each imposed, applying it to all identified orders. Finally, as an initial assessment, we examined the patterns of public health orders within and across counties, focusing on the timing of orders, the rate of increase and decrease in stricture, and on variation and convergence of orders within regions.

### **Public Availability**

We are making the dataset publicly available as part of our commitment to open data and combating the COVID-19 pandemic (<http://sc-cosmo.org>). We intend to update the dataset at least monthly. We are hopeful that others will use our methodological approach to characterize county-level or even city-level public health orders over time across additional states and would be happy to discuss this further via email ([jeremygf@stanford.edu](mailto:jeremygf@stanford.edu)). A description of the contents and linkages of released files are provided in Appendix Table 1.

### **Public Health Order Searches**

We developed and executed a search strategy to identify COVID-19 public health orders over the analytic time period applied to all California counties and the state itself. We identified website(s) for each county on which public health orders were released and supplemented this with web searches for press releases and media that combined county name, terms relating to COVID-19, and terms relating to public health orders and the topics they dealt with [1-59] (see also Appendix Tables 2 and 3). Search terms used in Google included combinations of each county's name and any of the following: declares emergency; bans gatherings; closes March; reopens April; reopens May; reopens June; Stage 2; Stage 3; recloses July; face coverings.

We recorded URLs and the date that each document was accessed, also archiving documents whenever possible. As some counties maintain only their most recent public health order on their websites (e.g., Solano County), we used the Wayback Machine to examine the orders contained on each such website at all points in time at which orders were added or changed [60]. In addition to gathering county public health orders, we also searched for and compiled the timing and topics of state-level public health guidance that applied to some or all of counties (e.g., all counties in the state, counties on a watch list, etc.) as this sometimes, explicitly or implicitly, substituted for or superseded county orders. Finally, when we encountered them, we separately noted instances where other county ordinances and orders may have related to COVID-19 but were not explicitly public health orders; we used this last category of information for narrative purposes only, excluding it from our dataset and analyses described below as we could not be sure that our search strategy would systematically identifying them in an equivalent way across time and counties.

### **Characteristic Extraction**

All public health orders and guidance had the following characteristics: 1) county(s) to which they pertained; 2) date of announcement; 3) date of effect; and 4) date of expiry<sup>1</sup> (which could be either an explicit date or ongoing).

### **Classification of Public Health Order Topics**

We began the schema for order classification using topics found in the COVID-19 US State Policy Database [61]. To these, we added 4 topics to reflect more thoroughly the actions found in the California county public health orders: moratorium on gatherings; quarantine for residents; and lab reporting & contact tracing; and characterization of social bubbling. The complete list of topics and their general definition are provided in Appendix Table 4. Based on full textual review by a study investigator, we classified each identified public health order as to whether it pertained to each of the 15 topics (e.g., face masks, gathering size, etc.). In the event of ambiguity of whether an order dealt with a given topic, a second study investigator reviewed the text and discussion to reach consensus was used to reach a final determination. A composite category of current level of county closure was added to the list which combined initial closures, reopenings, and reclosures (see below for further detail).

---

<sup>1</sup> Expiry dates were mainly used by counties in the beginning of the COVID-19 epidemic and were typically overwritten by additional orders before their expiration.

## Classification of Stricture on Each Public Health Order Topic

The primary focus of the classification of stricture was to gauge how public health orders relating to specific topics became more or less strict within each county over time. For example, instead of attempting to rank whether closure of indoor dining in a given county was more or less strict than closure of nail salons in another county, we focused on how the set of business types that were closed in a given county widened or narrowed over time. For certain topic areas (e.g., state of emergency), stricture was binary – whether an order about it existed at a given point in time or not. For others, stricture had ordinality (e.g., the increasing number of people allowed at gatherings or events). In addition to applying a within-county numeric scale, specific free text information was extracted to capture the details of how the order’s stricture on a given topic was determined. Lists of scales and their definitions are provided in Appendix Table 5. Based upon the scales we used, a study investigator classified the strictness of each order for each category it pertained to. Again, in the event of ambiguity, a second study investigator reviewed and discussed the particular example until consensus was reached. Since public health orders dealt with closures, reopenings, and reclosures, we constructed a combined variable on current strictness of closure/openness (which essentially added closure, reopening, and reclosure with a floor of 0 for completely open to account for differences in the ordinal scales we used). The main determinant of this variable’s value became the state-level tiered system upon the system’s rollout on August 31<sup>st</sup> with the exception that counties could opt to remain more strictly closed than the state system required [62].

## Descriptive Analysis of Public Health Orders and Their Topics and Stricture

We identified and characterized 1,853 state- and county-level public health orders related to COVID-19 that were issued between January 1, 2020 and December 31, 2020. Of those, 1,693 dealt with the key topics of physical distancing, stay at home, gathering, quarantine instructions for residents, quarantine instructions for visitors, reopening, reclosing, lab and contact tracing, mask restrictions, and social bubbles<sup>2</sup>.

Counts of orders: For the date ranges reviewed, we determined the number of COVID-19 public health orders promulgated. The months with the largest numbers of orders corresponded to rises in detected case rates.

Table 1: Number of orders by month

| Month    | Number of distinct orders |
|----------|---------------------------|
| January  | 3                         |
| February | 5                         |
| March    | 273                       |
| April    | 154                       |
| May      | 239                       |
| June     | 221                       |
| July     | 223                       |

<sup>2</sup> The topic of social bubbles, i.e., the number of individuals that your household can interact with, was introduced for the November 30<sup>th</sup> data release based on new orders being issued on this topic.

|           |     |
|-----------|-----|
| August    | 96  |
| September | 74  |
| October   | 119 |
| November  | 206 |
| December  | 80  |

Counts of topics covered by orders: For the date ranges reviewed, we determined the number of order-topics (i.e., each time any COVID-19 public health order dealt with a given topic). Like counts of orders, we treated the topics covered by state guidance and orders in two ways: including them as a county orders when relevant or excluding them. We also calculated the percent of each specific order type as a function of total orders. Since some orders dealt with multiple topics in a single order, the percentages sum to greater than one. A large fraction of orders dealt with which venues would be open or closed and/or the levels of their closure/openness.

Table 2: Number of orders by topic and percent of orders by topic

| Topic                    | Number of orders | Percent of orders related to topic |
|--------------------------|------------------|------------------------------------|
| Gathering                | 60               | 3.5%                               |
| Physical distancing      | 239              | 14.1%                              |
| Stay at home             | 342              | 20.2%                              |
| Quarantine for residents | 186              | 11.0%                              |
| Quarantine for visitors  | 20               | 1.2%                               |
| Reopening                | 684              | 40.4%                              |
| Reclosing                | 201              | 11.9%                              |
| Lab and contact tracing  | 80               | 4.7%                               |
| Mask restrictions        | 360              | 21.3%                              |
| Social bubbles           | 255              | 15.1%                              |

Counts of orders by county: For the date ranges reviewed, we determined the number of COVID-19 public health orders promulgated by each county and examined the distribution of these counts across counties. Since state guidance and orders could substitute for or supersede county orders, we generated county-level counts and other descriptive statistics in two ways, including relevant state orders as a county order when it applied and excluding state orders.

Table 3: Number of orders by county by month

| County       | Mar | April | May | June | July | Aug | Sept | Oct | Nov | Dec |
|--------------|-----|-------|-----|------|------|-----|------|-----|-----|-----|
| Alameda      | 7   | 4     | 2   | 3    | 6    | 2   | 2    | 5   | 5   | 2   |
| Alpine       | 6   | 1     | 2   | 5    | 1    | 1   | 0    | 1   | 4   | 1   |
| Amador       | 7   | 2     | 7   | 3    | 1    | 2   | 2    | 1   | 3   | 1   |
| Butte        | 3   | 1     | 4   | 3    | 2    | 1   | 2    | 2   | 4   | 2   |
| Calaveras    | 3   | 1     | 4   | 3    | 1    | 2   | 1    | 2   | 5   | 1   |
| Colusa       | 1   | 0     | 4   | 2    | 3    | 2   | 1    | 2   | 5   | 1   |
| Contra Costa | 7   | 2     | 4   | 4    | 8    | 1   | 4    | 3   | 6   | 3   |

|                 |    |   |   |   |   |   |   |   |   |   |
|-----------------|----|---|---|---|---|---|---|---|---|---|
| Del Norte       | 6  | 2 | 3 | 6 | 3 | 1 | 0 | 1 | 4 | 0 |
| El Dorado       | 4  | 2 | 3 | 3 | 1 | 1 | 1 | 1 | 5 | 1 |
| Fresno          | 2  | 1 | 5 | 4 | 5 | 1 | 2 | 1 | 4 | 1 |
| Glenn           | 4  | 0 | 2 | 5 | 4 | 2 | 1 | 2 | 4 | 0 |
| Humboldt        | 3  | 1 | 3 | 4 | 1 | 2 | 1 | 3 | 3 | 1 |
| Imperial        | 2  | 1 | 4 | 5 | 6 | 2 | 1 | 3 | 2 | 2 |
| Inyo            | 4  | 3 | 6 | 3 | 2 | 2 | 1 | 2 | 2 | 1 |
| Kern            | 3  | 3 | 2 | 4 | 3 | 1 | 1 | 2 | 4 | 1 |
| Kings           | 4  | 1 | 3 | 4 | 6 | 1 | 1 | 2 | 4 | 3 |
| Lake            | 9  | 7 | 5 | 4 | 2 | 1 | 0 | 2 | 3 | 0 |
| Lassen          | 2  | 3 | 5 | 3 | 1 | 1 | 1 | 1 | 3 | 0 |
| Los Angeles     | 9  | 3 | 6 | 6 | 8 | 1 | 2 | 7 | 4 | 2 |
| Madera          | 3  | 2 | 2 | 5 | 5 | 1 | 1 | 1 | 2 | 1 |
| Marin           | 8  | 2 | 6 | 5 | 5 | 2 | 1 | 3 | 3 | 3 |
| Mariposa        | 4  | 3 | 3 | 3 | 1 | 3 | 2 | 1 | 4 | 3 |
| Mendocino       | 5  | 4 | 4 | 3 | 5 | 4 | 2 | 3 | 4 | 1 |
| Merced          | 3  | 5 | 2 | 3 | 7 | 2 | 1 | 2 | 3 | 1 |
| Modoc           | 3  | 0 | 3 | 3 | 4 | 2 | 0 | 1 | 5 | 0 |
| Mono            | 5  | 3 | 6 | 4 | 6 | 2 | 1 | 2 | 1 | 4 |
| Monterey        | 2  | 3 | 4 | 4 | 4 | 1 | 1 | 1 | 1 | 2 |
| Napa            | 5  | 2 | 3 | 7 | 5 | 1 | 0 | 1 | 3 | 1 |
| Nevada          | 4  | 5 | 4 | 3 | 3 | 1 | 1 | 1 | 4 | 1 |
| Orange          | 4  | 3 | 4 | 4 | 6 | 1 | 1 | 1 | 5 | 2 |
| Placer          | 6  | 3 | 4 | 3 | 2 | 1 | 1 | 2 | 5 | 1 |
| Plumas          | 1  | 1 | 5 | 4 | 1 | 1 | 0 | 2 | 5 | 1 |
| Riverside       | 10 | 9 | 5 | 4 | 5 | 1 | 1 | 2 | 2 | 1 |
| Sacramento      | 3  | 1 | 3 | 4 | 4 | 4 | 3 | 2 | 4 | 2 |
| San Benito      | 4  | 2 | 3 | 3 | 4 | 1 | 1 | 2 | 4 | 1 |
| San Bernardino  | 6  | 5 | 4 | 1 | 5 | 1 | 1 | 1 | 2 | 1 |
| San Diego       | 7  | 5 | 4 | 4 | 7 | 3 | 1 | 1 | 2 | 3 |
| San Francisco   | 10 | 3 | 5 | 5 | 6 | 2 | 5 | 6 | 4 | 6 |
| San Joaquin     | 8  | 4 | 5 | 4 | 5 | 1 | 2 | 1 | 4 | 1 |
| San Luis Obispo | 7  | 5 | 4 | 3 | 4 | 1 | 1 | 3 | 4 | 1 |
| San Mateo       | 10 | 6 | 8 | 5 | 2 | 3 | 1 | 5 | 3 | 1 |
| Santa Barbara   | 3  | 5 | 4 | 5 | 7 | 3 | 4 | 3 | 3 | 3 |
| Santa Clara     | 8  | 3 | 1 | 3 | 7 | 2 | 1 | 2 | 4 | 2 |
| Santa Cruz      | 6  | 3 | 3 | 5 | 5 | 2 | 2 | 2 | 4 | 1 |
| Shasta          | 1  | 0 | 4 | 3 | 1 | 1 | 1 | 3 | 3 | 0 |
| Sierra          | 3  | 1 | 5 | 4 | 1 | 4 | 1 | 2 | 2 | 1 |
| Siskiyou        | 3  | 3 | 3 | 3 | 1 | 2 | 0 | 2 | 5 | 0 |
| Solano          | 5  | 2 | 4 | 5 | 5 | 1 | 2 | 1 | 4 | 1 |

|            |   |   |   |   |   |   |   |   |   |   |
|------------|---|---|---|---|---|---|---|---|---|---|
| Sonoma     | 7 | 5 | 6 | 5 | 4 | 2 | 1 | 1 | 1 | 1 |
| Stanislaus | 4 | 3 | 6 | 3 | 4 | 1 | 1 | 2 | 4 | 1 |
| Sutter     | 2 | 1 | 3 | 2 | 4 | 1 | 1 | 2 | 4 | 2 |
| Tehama     | 2 | 0 | 3 | 3 | 1 | 2 | 1 | 2 | 2 | 0 |
| Trinity    | 6 | 1 | 7 | 3 | 1 | 1 | 0 | 2 | 5 | 0 |
| Tulare     | 6 | 3 | 6 | 4 | 4 | 1 | 1 | 1 | 2 | 1 |
| Tuolumne   | 4 | 3 | 5 | 4 | 2 | 2 | 2 | 1 | 4 | 2 |
| Ventura    | 4 | 3 | 5 | 5 | 5 | 3 | 1 | 2 | 4 | 1 |
| Yolo       | 3 | 3 | 6 | 4 | 7 | 1 | 2 | 2 | 3 | 1 |
| Yuba       | 2 | 1 | 3 | 2 | 4 | 1 | 1 | 2 | 4 | 2 |

Daily rates of public health order/topic stricture by county: We employed graphical analysis to characterize the timing and relative degree of stricture of each county's orders related to each of the 15 topics. Additionally, we employed graphical analysis to characterize the relative degree of stricture within California regions. One particularly interesting feature that varies across counties is the use of face masking orders and the use of closure orders in the late spring and summer. In many counties, closure order strictness increased prior to masking order strictness. However, once masking order strictness increased, some counties appear to have moved to re-open while others maintained or increased closure strictness. The use of different order types as substitutes for one another or as complements is an important area for further research.

### Discussion and Conclusions

Without vaccines, non-pharmaceutical interventions have been the most widely used approach to controlling the spread of COVID-19 epidemics. Various jurisdictions have implemented public health orders as a means of reducing effective contacts and controlling their local epidemics. While multiple studies have examined the effectiveness of various orders (e.g. use of face masks) for epidemic control [63-69], a complete picture of the magnitude and mechanisms of effectiveness of orders and regulation will likely require geographical and temporal variation in the contents of orders and their strictness. Current data sets tend to report on orders and regulations on a national and/or state level with current county-level efforts not necessarily standardized in their review and curation nor in their characterization of the topics and level of strictness contained in each order [70-72].

We constructed a county-level longitudinal data set of public health orders issues by California and its 58 counties pertaining to its 40 million residents. We observe both spatial and temporal patterns in the timing and strictness of orders on a variety of topics across counties and over time. We have made the dataset publicly available as part of our commitment to open data and combating the COVID-19 pandemic (<http://sc-cosmo.org>).

There are many potential uses of the data set we have constructed and released. It can be used in a variety of quasi-experimental designs to estimate the effects of such orders on epidemic health outcomes and on non-health outcomes (e.g., unemployment), potentially refining or

extending prior studies in this area. It can be used to examine mechanisms like behavioral responses to such orders and compliance using either surveys such as those whose results are made available by Facebook or measured behavioral responses like those made available by Google's Mobility Trends [73-74].

The approach we have employed for California is not exclusively applicable to California, and our hope is that other researchers in other jurisdictions may build up similar data sets and make them publicly available, leveraging the methods and approach we have taken. We are eager to assist in such efforts to the extent possible.

In conclusion, our data set provides an open source and useful contribution to analyses of important issues related to the COVID-19 pandemic. Its methods may be used more broadly to characterize policy responses. Illustrating its utility, a descriptive examination of public health orders at the county-level in California that accounts for the timing of the orders, the topics the orders address, and their level of strictness highlights intriguing patterns like the use of masking orders as a complement to other types of closures in some jurisdictions, presumably attempting to further reduce COVID-19 incidence, and as a substitute to other types of closure in other jurisdictions, presumably attempt to maintain COVID-19 at low incidence while mitigating the effects of health orders on the local economy. Further analyses of such phenomena are highly relevant and urgently needed as the pandemic continues.



## References

1. State of California. <https://www.cdph.ca.gov/Programs/CID/DCDC/Pages/Guidance.aspx>
2. Los Angeles. <http://publichealth.lacounty.gov/media/Coronavirus/>
3. San Diego. [https://www.sandiegocounty.gov/content/sdc/hhsa/programs/phs/community\\_epidemiology/dc/2019-nCoV/health-order.html](https://www.sandiegocounty.gov/content/sdc/hhsa/programs/phs/community_epidemiology/dc/2019-nCoV/health-order.html)
4. Orange. <https://occcovid19.ochealthinfo.com/article/oc-health-officers-orders-recommendations>
5. Riverside. <https://www.rivcoph.org/Public-Health-Order-History>
6. San Bernardino. <https://sbcovid19.com/resources/#health-officer-orders>
7. Santa Clara. <https://www.sccgov.org/sites/covid19/Pages/public-health-orders.aspx>
8. Alameda. <https://covid-19.acgov.org/sip.page>
9. Sacramento. [https://www.saccounty.net/COVID-19/Pages/PublicHealthOrder\\_FAQs\\_Docs.aspx](https://www.saccounty.net/COVID-19/Pages/PublicHealthOrder_FAQs_Docs.aspx)
10. Contra Costa. <https://www.coronavirus.cchealth.org/health-orders>
11. Fresno. <https://www.co.fresno.ca.us/departments/public-health/covid-19/covid-19-orders>
12. Kern. <https://kernpublichealth.com/healthofficerorders/>
13. San Francisco. <https://www.sfdph.org/dph/alerts/coronavirus-healthorders.asp>
14. Ventura. <https://www.venturacountyrecovers.org/public-health-orders/>
15. San Mateo. <https://www.smchealth.org/coronavirus-health-officer-updates>
16. San Joaquin. <http://www.sjcphs.org/coronavirus.aspx>
17. Stanislaus. <http://schsa.org/corona-virus/ph-order/>
18. Sonoma. <https://socoemergency.org/emergency/novel-coronavirus/coronavirus-health-orders-guidance-archive/>
19. Tulare. <https://covid19.tularecounty.ca.gov/tulare-county-emergency-order-for-prevention-of-covid19-transmission/>
20. Solano. [https://www.solanocounty.com/depts/ph/covid\\_19\\_health\\_order.asp](https://www.solanocounty.com/depts/ph/covid_19_health_order.asp)
21. Santa Barbara. <https://publichealthsb.org/health-officer-orders/>
22. Monterey. <https://www.co.monterey.ca.us/government/departments-a-h/health/diseases/2019-novel-coronavirus-2019-ncov/health-officer-shelter-in-place-order>
23. Placer. <https://www.placer.ca.gov/coronavirus/news>
24. San Luis Obispo. [https://www.emergencyslo.org/en/covid-status.aspx?\\_mid\\_=448](https://www.emergencyslo.org/en/covid-status.aspx?_mid_=448)
25. Merced. <https://reopenmercedcounty.com/orders/>
26. Santa Cruz. <http://santacruzhealth.org/HSAHome/HSADivisions/PublicHealth/CommunicableDiseaseControl/Coronavirushome/PublicInformation.aspx>
27. Marin. [https://coronavirus.marinhhs.org/updates?field\\_categories\\_target\\_id=17](https://coronavirus.marinhhs.org/updates?field_categories_target_id=17)
28. Yolo. <https://www.yolocounty.org/health-human-services/adults/communicable-disease-investigation-and-control/novel-coronavirus-2019/shelter-in-place#:~:text=To%20strengthen%20this%20effort%20and,term%20used%20in%20emergency%20preparedness.>
29. Butte. <http://www.buttecounty.net/ph/Home/News>



30. El Dorado. <https://edcgov.us/Government/hhsa/Pages/EDCCOVID-19-Orders-Directives.aspx>
31. Imperial. <http://www.icphd.org/health-information-and-resources/healthy-facts/covid-19/guidance-and-resources/state-&-county-orders/>
32. Shasta. <https://www.co.shasta.ca.us/covid-19/news>
33. Madera. <https://www.maderacounty.com/government/public-health/corona-virus-covid-19/covid-revised>
34. Kings. <https://www.countyofkings.com/departments/health-welfare/public-health/coronavirus-disease-2019-covid-19/-fsiteid-1>
35. Napa. <https://www.countyofnapa.org/2739/Coronavirus>
36. Humboldt. <https://humboldt.gov.org/2725/Local-Orders>
37. Nevada. <https://www.mynevadacounty.com/2924/Coronavirus>
38. Sutter. <https://www.suttercounty.org/doc/government/depts/cao/em/coronavirus>
39. Mendocino. <https://www.mendocinocounty.org/community/novel-coronavirus/health-order>
40. Yuba. <https://www.yuba.org/coronavirus/HealthOrders.php>
41. Tehama. <https://www.tehamacohealthservices.net/order-of-the-tehama-county-health-officer/>
42. Lake. <http://health.co.lake.ca.us/Coronavirus/press.htm>
43. San Benito. <https://hhsa.cosb.us/public-health/covid-19/>
44. Tuolumne. <https://www.tuolumnecounty.ca.gov/1290/Health-Officer-Orders>
45. Calaveras. <https://covid19.calaverasgov.us/#gsc.tab=0>
46. Siskiyou. <https://www.co.siskiyou.ca.us/publichealth/page/public-health-order-siskiyou-county-public-health-officer-posted-3162020>
47. Amador. <https://www.amadorgov.org/services/public-health/covid-19/emergency-declarations-and-health-officer-orders>
48. Lassen. <https://lassencares.org/local-press-releases>
49. Glenn. <https://www.countyofglenn.net/dept/health-human-services/public-health/covid-19>
50. Del Norte. <http://www.co.del-norte.ca.us/departments/health-human-services/public-health/health-safety-alerts>
51. Colusa. <http://www.countyofcolusa.org/771/COVID19>
52. Plumas. <https://www.plumascounty.us/2669/Novel-Coronavirus-2019-COVID-19>
53. Inyo. <https://www.inyocounty.us/covid-19/orders-directives>
54. Mariposa. <https://www.mariposacounty.org/2445/Health-Officer-Orders-and-Press-Releases>
55. Mono. <https://coronavirus.monocounty.ca.gov/pages/directives>
56. Trinity. <https://www.trinitycounty.org/covid-19/public-health-advisories>
57. Modoc. <https://modochealthservices.org/corona-virus>
58. Sierra. <https://sierracounty.ca.gov/596/Press-Releases>
59. Alpine. <http://alpinecountyca.gov/Index.aspx?NID=516>
60. The Wayback Machine. <https://archive.org/web/>
61. The COVID-19 US State Policy Database. [https://docs.google.com/spreadsheets/d/1zu9qEWI8PsOI\\_i8nI\\_S29HDGHlIp2lfVMsGxpQ5tvAQ/edit#gid=973655443](https://docs.google.com/spreadsheets/d/1zu9qEWI8PsOI_i8nI_S29HDGHlIp2lfVMsGxpQ5tvAQ/edit#gid=973655443)

62. California's Blueprint for a Safer Economy. <https://covid19.ca.gov/safer-economy/>
63. Chernozhukov V, Kasahara H, Schrimpf P. Causal impact of masks, policies, behavior on early covid-19 pandemic in the U.S. *J Econom*. 2020 Oct 17.
64. Gallaway MS, Rigler J, Robinson S, Herrick K, Livar E, Komatsu KK, Brady S, Cunico J, Christ CM. Trends in COVID-19 Incidence After Implementation of Mitigation Measures - Arizona, January 22-August 7, 2020. *MMWR Morb Mortal Wkly Rep*. 2020 Oct 9;69(40):1460-1463.
65. Casares M, Khan H. The Timing and Intensity of Social Distancing to Flatten the COVID-19 Curve: The Case of Spain. *Int J Environ Res Public Health*. 2020 Oct 6;17(19):7283.
66. Goldstein ND, Suder JS. Application of state law in the public health emergency response to COVID-19: an example from Delaware in the United States. *J Public Health Policy*. 2020 Sep 28:1–9.
67. Betsch C, Korn L, Sprengholz P, Felgendreff L, Eitze S, Schmid P, Böhm R. Social and behavioral consequences of mask policies during the COVID-19 pandemic. *Proc Natl Acad Sci U S A*. 2020 Sep 8;117(36):21851-21853.
68. Dave D, Friedson AI, Matsuzawa K, Sabia JJ. When Do Shelter-in-Place Orders Fight COVID-19 Best? Policy Heterogeneity Across States and Adoption Time. *Econ Inq*. 2020 Aug 3:10.1111/ecin.12944.
69. Lyu W, Wehby GL. Community Use Of Face Masks And COVID-19: Evidence From A Natural Experiment Of State Mandates In The US. *Health Aff (Millwood)*. 2020 Aug;39(8):1419-1425.
70. Kaiser Family Foundation. State Data and Policy Actions to Address Coronavirus. <https://www.kff.org/coronavirus-covid-19/issue-brief/state-data-and-policy-actions-to-address-coronavirus/>
71. U.S. Department of Health and Human Services. COVID-19 State and County Policy Orders. <https://healthdata.gov/dataset/covid-19-state-and-county-policy-orders>
72. Zheng, Q., Jones, F.K., Leavitt, S.V. et al. HIT-COVID, a global database tracking public health interventions to COVID-19. *Sci Data* 7, 286 (2020).
73. Facebook COVID-19 Symptom Survey. <https://dataforgood.fb.com/docs/covid-19-symptom-survey-request-for-data-access/>
74. Google Community Mobility Reports. <https://www.google.com/covid19/mobility/>

## Appendix

### State- and County-Level COVID-19 Public Health Orders in California: Constructing a Dataset and Describing Their Timing, Content, and Stricture

Jeremy D. Goldhaber-Fiebert (1), Alexander F. Holsinger (1,2), Erin Holsinger (1), Elizabeth Long (1) on behalf of the SC-COSMO Modeling Consortium

January 10, 2021

(1) Stanford Health Policy, Centers for Health Policy and Primary Care and Outcomes Research, Stanford University School of Medicine and the Freeman Spogli Institute of International Studies, Stanford, CA, USA

(2) University of Texas at Austin, Austin, TX, USA

Appendix Table 1: Details of released data files

|                       |                                                                                                                                                                                                                                                                                                                                                                                                                                                                                                                                                                                                                                                                                                                                                                                                                                                                                                                                                                                                                                                                            |
|-----------------------|----------------------------------------------------------------------------------------------------------------------------------------------------------------------------------------------------------------------------------------------------------------------------------------------------------------------------------------------------------------------------------------------------------------------------------------------------------------------------------------------------------------------------------------------------------------------------------------------------------------------------------------------------------------------------------------------------------------------------------------------------------------------------------------------------------------------------------------------------------------------------------------------------------------------------------------------------------------------------------------------------------------------------------------------------------------------------|
| PH_Orders_long        | Contains the main data that is the result of scraping the web for all county public health orders and state public health directives. Based on review of the full text, the orders are each coded as to which category(s) (e.g., masking, closures) they pertain to and the ordinal relative level of stricture they represent. The file contains the following columns: county, dt_PHO, order_value, order_type. The variable county refers to one of 58 of California’s counties (without the trailing string “County”). The variable order_type refers to the category of restriction referred to in a public health order. The variable order_value refers to the level of stricture for a particular order type in a particular county. The variable dt_PHO refers to the date that the county was at a particular level of stricture for a particular order type. This data set does not directly show when the county put out each of its order but changes in levels of order_value for order type on consecutive days show when there was an order(s) propagated. |
| PH_Orders_order_type  | Contains slightly longer textual descriptions of the order types. It can be joined with PH_Orders_long using the order_type column.                                                                                                                                                                                                                                                                                                                                                                                                                                                                                                                                                                                                                                                                                                                                                                                                                                                                                                                                        |
| PH_Orders_order_value | Contains the meanings of the scales for order values in within each order type. It can be joined with PH_Orders_order_type using the order_type column or with the PH_Orders_long using the order_type and order_value columns.                                                                                                                                                                                                                                                                                                                                                                                                                                                                                                                                                                                                                                                                                                                                                                                                                                            |
| PH_Orders_region      | Contains groupings of counties into regions based on CDPH groupings for “Economic Regions”. Can be found at: <a href="https://calcat.covid19.ca.gov/cacovidmodels/">calcat.covid19.ca.gov/cacovidmodels/</a>                                                                                                                                                                                                                                                                                                                                                                                                                                                                                                                                                                                                                                                                                                                                                                                                                                                               |
| PH_Orders_statewide   | Contains information when state-wide public health orders came into effect. It essentially shows which order type the state-wide                                                                                                                                                                                                                                                                                                                                                                                                                                                                                                                                                                                                                                                                                                                                                                                                                                                                                                                                           |

|  |                                                                                                                                                                                                                                                                                                                                                                                                                                                                                                                                                                                                                                                   |
|--|---------------------------------------------------------------------------------------------------------------------------------------------------------------------------------------------------------------------------------------------------------------------------------------------------------------------------------------------------------------------------------------------------------------------------------------------------------------------------------------------------------------------------------------------------------------------------------------------------------------------------------------------------|
|  | <p>order pertains to and the date on which it went into effect. It also documents the order value that was mandated. Note several important things. First, when the state produced tiers, the value for some counties could differ from others depending on the tiers they were in (hence in the order_value column for the statewide file we see a set of values that correspond to the state-mandated levels for each tier). Second, counties could opt to remain stricter than the state's order level and hence county values may be greater than these values. This is relevant both for simple state-wide orders and for tiered orders.</p> |
|--|---------------------------------------------------------------------------------------------------------------------------------------------------------------------------------------------------------------------------------------------------------------------------------------------------------------------------------------------------------------------------------------------------------------------------------------------------------------------------------------------------------------------------------------------------------------------------------------------------------------------------------------------------|

Appendix Table 2. Websites accessed for searches of public health orders (main governmental sites)

| County Name         | County Public Health Website                                                                                                                                                                                                                                                                                                                                                                                                                                                                      |
|---------------------|---------------------------------------------------------------------------------------------------------------------------------------------------------------------------------------------------------------------------------------------------------------------------------------------------------------------------------------------------------------------------------------------------------------------------------------------------------------------------------------------------|
| State of California | <a href="https://www.cdph.ca.gov/Programs/CID/DCDC/Pages/Guidance.aspx">https://www.cdph.ca.gov/Programs/CID/DCDC/Pages/Guidance.aspx</a>                                                                                                                                                                                                                                                                                                                                                         |
| Los Angeles         | <a href="http://publichealth.lacounty.gov/media/Coronavirus/">http://publichealth.lacounty.gov/media/Coronavirus/</a>                                                                                                                                                                                                                                                                                                                                                                             |
| San Diego           | <a href="https://www.sandiegocounty.gov/content/sdc/hhsa/programs/phs/community_epidemiology/dc/2019-nCoV/health-order.html">https://www.sandiegocounty.gov/content/sdc/hhsa/programs/phs/community_epidemiology/dc/2019-nCoV/health-order.html</a>                                                                                                                                                                                                                                               |
| Orange              | <a href="https://occovid19.ochealthinfo.com/article/oc-health-officers-orders-recommendations">https://occovid19.ochealthinfo.com/article/oc-health-officers-orders-recommendations</a>                                                                                                                                                                                                                                                                                                           |
| Riverside           | <a href="https://www.rivcoph.org/Public-Health-Order-History">https://www.rivcoph.org/Public-Health-Order-History</a>                                                                                                                                                                                                                                                                                                                                                                             |
| San Bernardino      | <a href="https://sbcovid19.com/resources/#health-officer-orders">https://sbcovid19.com/resources/#health-officer-orders</a>                                                                                                                                                                                                                                                                                                                                                                       |
| Santa Clara         | <a href="https://www.sccgov.org/sites/covid19/Pages/public-health-orders.aspx">https://www.sccgov.org/sites/covid19/Pages/public-health-orders.aspx</a>                                                                                                                                                                                                                                                                                                                                           |
| Alameda             | <a href="https://covid-19.acgov.org/sip.page">https://covid-19.acgov.org/sip.page</a>                                                                                                                                                                                                                                                                                                                                                                                                             |
| Sacramento          | <a href="https://www.saccounty.net/COVID-19/Pages/PublicHealthOrder_FAQs_Docs.aspx">https://www.saccounty.net/COVID-19/Pages/PublicHealthOrder_FAQs_Docs.aspx</a>                                                                                                                                                                                                                                                                                                                                 |
| Contra Costa        | <a href="https://www.coronavirus.cchealth.org/health-orders">https://www.coronavirus.cchealth.org/health-orders</a>                                                                                                                                                                                                                                                                                                                                                                               |
| Fresno              | <a href="https://www.co.fresno.ca.us/departments/public-health/covid-19/covid-19-orders">https://www.co.fresno.ca.us/departments/public-health/covid-19/covid-19-orders</a>                                                                                                                                                                                                                                                                                                                       |
| Kern                | <a href="https://kernpublichealth.com/healthofficerorders/">https://kernpublichealth.com/healthofficerorders/</a>                                                                                                                                                                                                                                                                                                                                                                                 |
| San Francisco       | <a href="https://www.sfdph.org/dph/alerts/coronavirus-healthorders.asp">https://www.sfdph.org/dph/alerts/coronavirus-healthorders.asp</a>                                                                                                                                                                                                                                                                                                                                                         |
| Ventura             | <a href="https://www.venturacountyrecovers.org/public-health-orders/">https://www.venturacountyrecovers.org/public-health-orders/</a>                                                                                                                                                                                                                                                                                                                                                             |
| San Mateo           | <a href="https://www.smchealth.org/coronavirus-health-officer-updates">https://www.smchealth.org/coronavirus-health-officer-updates</a>                                                                                                                                                                                                                                                                                                                                                           |
| San Joaquin         | <a href="http://www.sjcphs.org/coronavirus.aspx">http://www.sjcphs.org/coronavirus.aspx</a>                                                                                                                                                                                                                                                                                                                                                                                                       |
| Stanislaus          | <a href="http://schsa.org/corona-virus/ph-order/">http://schsa.org/corona-virus/ph-order/</a>                                                                                                                                                                                                                                                                                                                                                                                                     |
| Sonoma              | <a href="https://socoemergency.org/emergency/novel-coronavirus/coronavirus-health-orders-guidance-archive/">https://socoemergency.org/emergency/novel-coronavirus/coronavirus-health-orders-guidance-archive/</a>                                                                                                                                                                                                                                                                                 |
| Tulare              | <a href="https://covid19.tularecounty.ca.gov/tulare-county-emergency-order-for-prevention-of-covid19-transmission/">https://covid19.tularecounty.ca.gov/tulare-county-emergency-order-for-prevention-of-covid19-transmission/</a>                                                                                                                                                                                                                                                                 |
| Solano              | <a href="https://www.solanocounty.com/depts/ph/covid_19_health_order.asp">https://www.solanocounty.com/depts/ph/covid_19_health_order.asp</a>                                                                                                                                                                                                                                                                                                                                                     |
| Santa Barbara       | <a href="https://publichealthsb.org/health-officer-orders/">https://publichealthsb.org/health-officer-orders/</a>                                                                                                                                                                                                                                                                                                                                                                                 |
| Monterey            | <a href="https://www.co.monterey.ca.us/government/departments-a-h/health/diseases/2019-novel-coronavirus-2019-ncov/health-officer-shelter-in-place-order">https://www.co.monterey.ca.us/government/departments-a-h/health/diseases/2019-novel-coronavirus-2019-ncov/health-officer-shelter-in-place-order</a>                                                                                                                                                                                     |
| Placer              | <a href="https://www.placer.ca.gov/coronavirus/news">https://www.placer.ca.gov/coronavirus/news</a>                                                                                                                                                                                                                                                                                                                                                                                               |
| San Luis Obispo     | <a href="https://www.emergencyslo.org/en/covid-status.aspx?_mid_=448">https://www.emergencyslo.org/en/covid-status.aspx?_mid_=448</a>                                                                                                                                                                                                                                                                                                                                                             |
| Merced              | <a href="https://reopenmercedcounty.com/orders/">https://reopenmercedcounty.com/orders/</a>                                                                                                                                                                                                                                                                                                                                                                                                       |
| Santa Cruz          | <a href="http://santacruzhealth.org/HSAHome/HSADivisions/PublicHealth/CommunicableDiseaseControl/Coronavirushome/PublicInformation.aspx">http://santacruzhealth.org/HSAHome/HSADivisions/PublicHealth/CommunicableDiseaseControl/Coronavirushome/PublicInformation.aspx</a>                                                                                                                                                                                                                       |
| Marin               | <a href="https://coronavirus.marinhhs.org/updates?field_categories_target_id=17">https://coronavirus.marinhhs.org/updates?field_categories_target_id=17</a>                                                                                                                                                                                                                                                                                                                                       |
| Yolo                | <a href="https://www.yolocounty.org/health-human-services/adults/communicable-disease-investigation-and-control/novel-coronavirus-2019/shelter-in-place#:~:text=To%20strengthen%20this%20effort%20and,term%20used%20in%20emergency%20preparedness.">https://www.yolocounty.org/health-human-services/adults/communicable-disease-investigation-and-control/novel-coronavirus-2019/shelter-in-place#:~:text=To%20strengthen%20this%20effort%20and,term%20used%20in%20emergency%20preparedness.</a> |
| Butte               | <a href="http://www.buttecounty.net/ph/Home/News">http://www.buttecounty.net/ph/Home/News</a>                                                                                                                                                                                                                                                                                                                                                                                                     |
| El Dorado           | <a href="https://edcgov.us/Government/hhsa/Pages/EDCCOVID-19-Orders-Directives.aspx">https://edcgov.us/Government/hhsa/Pages/EDCCOVID-19-Orders-Directives.aspx</a>                                                                                                                                                                                                                                                                                                                               |
| Imperial            | <a href="http://www.icphd.org/health-information-and-resources/healthy-facts/covid-19/guidance-and-resources/state-&amp;-county-orders/">http://www.icphd.org/health-information-and-resources/healthy-facts/covid-19/guidance-and-resources/state-&amp;-county-orders/</a>                                                                                                                                                                                                                       |
| Shasta              | <a href="https://www.co.shasta.ca.us/covid-19/news">https://www.co.shasta.ca.us/covid-19/news</a>                                                                                                                                                                                                                                                                                                                                                                                                 |
| Madera              | <a href="https://www.maderacounty.com/government/public-health/corona-virus-covid-19/covid-revised">https://www.maderacounty.com/government/public-health/corona-virus-covid-19/covid-revised</a>                                                                                                                                                                                                                                                                                                 |
| Kings               | <a href="https://www.countyofkings.com/departments/health-welfare/public-health/coronavirus-disease-2019-covid-19/-fsiteid-1">https://www.countyofkings.com/departments/health-welfare/public-health/coronavirus-disease-2019-covid-19/-fsiteid-1</a>                                                                                                                                                                                                                                             |
| Napa                | <a href="https://www.countyofnapa.org/2739/Coronavirus">https://www.countyofnapa.org/2739/Coronavirus</a>                                                                                                                                                                                                                                                                                                                                                                                         |
| Humboldt            | <a href="https://humboldtgov.org/2725/Local-Orders">https://humboldtgov.org/2725/Local-Orders</a>                                                                                                                                                                                                                                                                                                                                                                                                 |

|            |                                                                                                                                                                                                                                                                 |
|------------|-----------------------------------------------------------------------------------------------------------------------------------------------------------------------------------------------------------------------------------------------------------------|
| Nevada     | <a href="https://www.mynevadacounty.com/2924/Coronavirus">https://www.mynevadacounty.com/2924/Coronavirus</a>                                                                                                                                                   |
| Sutter     | <a href="https://www.suttercounty.org/doc/government/depts/cao/em/coronavirus">https://www.suttercounty.org/doc/government/depts/cao/em/coronavirus</a>                                                                                                         |
| Mendocino  | <a href="https://www.mendocinocounty.org/community/novel-coronavirus/health-order">https://www.mendocinocounty.org/community/novel-coronavirus/health-order</a>                                                                                                 |
| Yuba       | <a href="https://www.yuba.org/coronavirus/HealthOrders.php">https://www.yuba.org/coronavirus/HealthOrders.php</a>                                                                                                                                               |
| Tehama     | <a href="https://www.tehamahealthservices.net/order-of-the-tehama-county-health-officer/">https://www.tehamahealthservices.net/order-of-the-tehama-county-health-officer/</a>                                                                                   |
| Lake       | <a href="http://health.co.lake.ca.us/Coronavirus/press.htm">http://health.co.lake.ca.us/Coronavirus/press.htm</a>                                                                                                                                               |
| San Benito | <a href="https://hhsa.cosb.us/public-health/covid-19/">https://hhsa.cosb.us/public-health/covid-19/</a>                                                                                                                                                         |
| Tuolumne   | <a href="https://www.tuolumnecounty.ca.gov/1290/Health-Officer-Orders">https://www.tuolumnecounty.ca.gov/1290/Health-Officer-Orders</a>                                                                                                                         |
| Calaveras  | <a href="https://covid19.calaverasgov.us/#gsc.tab=0">https://covid19.calaverasgov.us/#gsc.tab=0</a>                                                                                                                                                             |
| Siskiyou   | <a href="https://www.co.siskiyou.ca.us/publichealth/page/public-health-order-siskiyou-county-public-health-officer-posted-3162020">https://www.co.siskiyou.ca.us/publichealth/page/public-health-order-siskiyou-county-public-health-officer-posted-3162020</a> |
| Amador     | <a href="https://www.amadorgov.org/services/public-health/covid-19/emergency-declarations-and-health-officer-orders">https://www.amadorgov.org/services/public-health/covid-19/emergency-declarations-and-health-officer-orders</a>                             |
| Lassen     | <a href="https://lassencares.org/local-press-releases">https://lassencares.org/local-press-releases</a>                                                                                                                                                         |
| Glenn      | <a href="https://www.countyofglenn.net/dept/health-human-services/public-health/covid-19">https://www.countyofglenn.net/dept/health-human-services/public-health/covid-19</a>                                                                                   |
| Del Norte  | <a href="http://www.co.del-norte.ca.us/departments/health-human-services/public-health/health-safety-alerts">http://www.co.del-norte.ca.us/departments/health-human-services/public-health/health-safety-alerts</a>                                             |
| Colusa     | <a href="http://www.countyofcolusa.org/771/COVID19">http://www.countyofcolusa.org/771/COVID19</a>                                                                                                                                                               |
| Plumas     | <a href="https://www.plumascounty.us/2669/Novel-Coronavirus-2019-COVID-19">https://www.plumascounty.us/2669/Novel-Coronavirus-2019-COVID-19</a>                                                                                                                 |
| Inyo       | <a href="https://www.inyocounty.us/covid-19/orders-directives">https://www.inyocounty.us/covid-19/orders-directives</a>                                                                                                                                         |
| Mariposa   | <a href="https://www.mariposacounty.org/2445/Health-Officer-Orders-and-Press-Releases">https://www.mariposacounty.org/2445/Health-Officer-Orders-and-Press-Releases</a>                                                                                         |
| Mono       | <a href="https://coronavirus.monocounty.ca.gov/pages/directives">https://coronavirus.monocounty.ca.gov/pages/directives</a>                                                                                                                                     |
| Trinity    | <a href="https://www.trinitycounty.org/covid-19/public-health-advisories">https://www.trinitycounty.org/covid-19/public-health-advisories</a>                                                                                                                   |
| Modoc      | <a href="https://modohealthservices.org/corona-virus">https://modohealthservices.org/corona-virus</a>                                                                                                                                                           |
| Sierra     | <a href="https://sierracounty.ca.gov/596/Press-Releases">https://sierracounty.ca.gov/596/Press-Releases</a>                                                                                                                                                     |
| Alpine     | <a href="http://alpinecountyca.gov/Index.aspx?NID=516">http://alpinecountyca.gov/Index.aspx?NID=516</a>                                                                                                                                                         |

Appendix Table 3. Additional websites accessed for county and state public health orders



|         |           |                                                                                                                                                                                                                                                                                                                                                                                                                                                                                                                                                                                       |
|---------|-----------|---------------------------------------------------------------------------------------------------------------------------------------------------------------------------------------------------------------------------------------------------------------------------------------------------------------------------------------------------------------------------------------------------------------------------------------------------------------------------------------------------------------------------------------------------------------------------------------|
| Alameda | 10-Mar-20 | <a href="https://www.ousd.org/cms/lib/CA01001176/Centricity/Domain/5869/alameda-county-guidance-for-mass-gatherings-20200310.pdf">https://www.ousd.org/cms/lib/CA01001176/Centricity/Domain/5869/alameda-county-guidance-for-mass-gatherings-20200310.pdf</a>                                                                                                                                                                                                                                                                                                                         |
| Alameda | 12-Mar-20 | <a href="http://www.acphd.org/media/558618/alameda-county-guidance-for-mass-gatherings-20200312.pdf">http://www.acphd.org/media/558618/alameda-county-guidance-for-mass-gatherings-20200312.pdf</a>                                                                                                                                                                                                                                                                                                                                                                                   |
| Alameda | 16-Mar-20 | <a href="https://www.acgov.org/documents/Final-Order-to-Shelter-In-Place.pdf">https://www.acgov.org/documents/Final-Order-to-Shelter-In-Place.pdf</a>                                                                                                                                                                                                                                                                                                                                                                                                                                 |
| Alameda | 19-Mar-20 | <a href="https://www.gov.ca.gov/wp-content/uploads/2020/03/3.19.20-attested-EO-N-33-20-COVID-19-HEALTH-ORDER.pdf">https://www.gov.ca.gov/wp-content/uploads/2020/03/3.19.20-attested-EO-N-33-20-COVID-19-HEALTH-ORDER.pdf</a>                                                                                                                                                                                                                                                                                                                                                         |
| Alameda | 24-Mar-20 | <a href="http://www.acphd.org/media/561769/health-officer-order-reporting-covid19-test-information-20200324.pdf">http://www.acphd.org/media/561769/health-officer-order-reporting-covid19-test-information-20200324.pdf</a>                                                                                                                                                                                                                                                                                                                                                           |
| Alameda | 25-Mar-20 | <a href="https://www.mercurynews.com/2020/03/25/bay-area-counties-extend-school-closures-through-may-1/">https://www.mercurynews.com/2020/03/25/bay-area-counties-extend-school-closures-through-may-1/</a>                                                                                                                                                                                                                                                                                                                                                                           |
| Alameda | 31-Mar-20 | <a href="http://www.acphd.org/media/563688/health-officer-order-20-04-shelter-in-place-20200331.pdf">http://www.acphd.org/media/563688/health-officer-order-20-04-shelter-in-place-20200331.pdf</a>                                                                                                                                                                                                                                                                                                                                                                                   |
| Alameda | 3-Apr-20  | <a href="https://covid-19.acgov.org/covid19-assets/docs/isolation-quarantine/isolation-order-eng-2020.07.28.pdf">https://covid-19.acgov.org/covid19-assets/docs/isolation-quarantine/isolation-order-eng-2020.07.28.pdf</a>                                                                                                                                                                                                                                                                                                                                                           |
| Alameda | 3-Apr-20  | <a href="https://covid-19.acgov.org/covid19-assets/docs/isolation-quarantine/quarantine-order-eng-2020.07.28.pdf">https://covid-19.acgov.org/covid19-assets/docs/isolation-quarantine/quarantine-order-eng-2020.07.28.pdf</a>                                                                                                                                                                                                                                                                                                                                                         |
| Alameda | 17-Apr-20 | <a href="http://www.acphd.org/media/569455/health-officer-order-20-08-face-coverings-2020.04.17.pdf">http://www.acphd.org/media/569455/health-officer-order-20-08-face-coverings-2020.04.17.pdf</a>                                                                                                                                                                                                                                                                                                                                                                                   |
| Alameda | 29-Apr-20 | <a href="http://acphd.org/media/572718/health-officer-order-20-10-shelter-in-place-20200429.pdf">http://acphd.org/media/572718/health-officer-order-20-10-shelter-in-place-20200429.pdf</a>                                                                                                                                                                                                                                                                                                                                                                                           |
| Alameda | 13-May-20 | <a href="http://www.acphd.org/media/575268/acphd-resumption-of-non-urgent-health-care-services-2020.05.13.pdf">http://www.acphd.org/media/575268/acphd-resumption-of-non-urgent-health-care-services-2020.05.13.pdf</a>                                                                                                                                                                                                                                                                                                                                                               |
| Alameda | 18-May-20 | <a href="http://acphd.org/media/577617/alameda-county-health-officer-order-20-12-english.pdf">http://acphd.org/media/577617/alameda-county-health-officer-order-20-12-english.pdf</a>                                                                                                                                                                                                                                                                                                                                                                                                 |
| Alameda | 18-May-20 | <a href="http://acphd.org/media/577582/alameda-county-health-officer-order-20-11-english.pdf">http://acphd.org/media/577582/alameda-county-health-officer-order-20-11-english.pdf</a>                                                                                                                                                                                                                                                                                                                                                                                                 |
| Alameda | 5-Jun-20  | <a href="http://acphd.org/media/584322/alameda-county-health-officer-order-20-14-english.pdf">http://acphd.org/media/584322/alameda-county-health-officer-order-20-14-english.pdf</a>                                                                                                                                                                                                                                                                                                                                                                                                 |
| Alameda | 18-Jun-20 | <a href="https://www.cdph.ca.gov/Programs/CID/DCDC/CDPH%20Document%20Library/COVID-19/Guidance-for-Face-Coverings_06-18-2020.pdf">https://www.cdph.ca.gov/Programs/CID/DCDC/CDPH%20Document%20Library/COVID-19/Guidance-for-Face-Coverings_06-18-2020.pdf</a>                                                                                                                                                                                                                                                                                                                         |
| Alameda | 18-Jun-20 | <a href="http://acphd.org/media/587287/alameda-county-health-officer-order-summary-20-14-a-english.pdf">http://acphd.org/media/587287/alameda-county-health-officer-order-summary-20-14-a-english.pdf</a>                                                                                                                                                                                                                                                                                                                                                                             |
| Alameda | 29-Jun-20 | <a href="http://www.acphd.org/media/589530/statement-from--achcsa-alco-hits-pause-on-reopening.pdf">http://www.acphd.org/media/589530/statement-from--achcsa-alco-hits-pause-on-reopening.pdf</a>                                                                                                                                                                                                                                                                                                                                                                                     |
| Alameda | 9-Jul-20  | <a href="https://abc7news.com/health/cities-push-back-after-outdoor-dining-prohibited-in-alameda-co-under-new-ca-guidelines/6312857/">https://abc7news.com/health/cities-push-back-after-outdoor-dining-prohibited-in-alameda-co-under-new-ca-guidelines/6312857/</a>                                                                                                                                                                                                                                                                                                                 |
| Alameda | 13-Jul-20 | <a href="https://covid-19.acgov.org/covid19-assets/docs/response/hcsa-weekly-update-2020.07.13.pdf">https://covid-19.acgov.org/covid19-assets/docs/response/hcsa-weekly-update-2020.07.13.pdf</a>                                                                                                                                                                                                                                                                                                                                                                                     |
| Alameda | 13-Jul-20 | <a href="https://www.latimes.com/california/story/2020-07-13/newsom-california-county-rollback-reopening-coronavirus">https://www.latimes.com/california/story/2020-07-13/newsom-california-county-rollback-reopening-coronavirus</a>                                                                                                                                                                                                                                                                                                                                                 |
| Alameda | 15-Jul-20 | <a href="http://www.acphd.org/media/592502/press-release-2020.07.15.pdf">http://www.acphd.org/media/592502/press-release-2020.07.15.pdf</a>                                                                                                                                                                                                                                                                                                                                                                                                                                           |
| Alameda | 17-Jul-20 | <a href="https://www.cdph.ca.gov/Programs/CID/DCDC/CDPH%20Document%20Library/COVID-19/Schools%20Reopening%20Recommendations.pdf">https://www.cdph.ca.gov/Programs/CID/DCDC/CDPH%20Document%20Library/COVID-19/Schools%20Reopening%20Recommendations.pdf</a>                                                                                                                                                                                                                                                                                                                           |
| Alameda | 19-Jul-20 | <a href="https://covid-19.acgov.org/covid19-assets/docs/shelter-in-place/20-14b-social-distancing-eng.pdf">https://covid-19.acgov.org/covid19-assets/docs/shelter-in-place/20-14b-social-distancing-eng.pdf</a>                                                                                                                                                                                                                                                                                                                                                                       |
| Alameda | 20-Aug-20 | <a href="https://covid-19.acgov.org/covid19-assets/docs/shelter-in-place/20-14c-social-distancing-eng.pdf">https://covid-19.acgov.org/covid19-assets/docs/shelter-in-place/20-14c-social-distancing-eng.pdf</a>                                                                                                                                                                                                                                                                                                                                                                       |
| Alameda | 28-Aug-20 | <a href="https://covid-19.acgov.org/covid19-assets/docs/press/press-release-2020.09.02.pdf">https://covid-19.acgov.org/covid19-assets/docs/press/press-release-2020.09.02.pdf</a>                                                                                                                                                                                                                                                                                                                                                                                                     |
| Alameda | 22-Sep-20 | <a href="https://patch.com/california/livermore/alameda-county-downgraded-red-tier-state-says">https://patch.com/california/livermore/alameda-county-downgraded-red-tier-state-says</a>                                                                                                                                                                                                                                                                                                                                                                                               |
| Alameda | 25-Sep-20 | <a href="https://covid-19.acgov.org/covid19-assets/docs/shelter-in-place/20-15-social-distancing-eng.pdf">https://covid-19.acgov.org/covid19-assets/docs/shelter-in-place/20-15-social-distancing-eng.pdf</a>                                                                                                                                                                                                                                                                                                                                                                         |
| Alameda | 9-Oct-20  | <a href="https://wp.sbcounty.gov/cao/countywire/?p=9160#:~:text=Private%20outdoor%20gatherings%20of%20three%20households%20now%20allowed%20throughout%20the%20county%2C%20state,-Published%20October%209&amp;text=Private%20outdoor%20gatherings%20of%20people,Gavin%20Newsom%20on%20Friday.">https://wp.sbcounty.gov/cao/countywire/?p=9160#:~:text=Private%20outdoor%20gatherings%20of%20three%20households%20now%20allowed%20throughout%20the%20county%2C%20state,-Published%20October%209&amp;text=Private%20outdoor%20gatherings%20of%20people,Gavin%20Newsom%20on%20Friday.</a> |
| Alameda | 9-Oct-20  | <a href="https://covid-19.acgov.org/covid19-assets/docs/press/press-release-2020.10.13.pdf">https://covid-19.acgov.org/covid19-assets/docs/press/press-release-2020.10.13.pdf</a>                                                                                                                                                                                                                                                                                                                                                                                                     |
| Alameda | 13-Oct-20 | <a href="https://covid-19.acgov.org/covid19-assets/docs/press/press-release-2020.10.13.pdf">https://covid-19.acgov.org/covid19-assets/docs/press/press-release-2020.10.13.pdf</a>                                                                                                                                                                                                                                                                                                                                                                                                     |
| Alameda | 16-Oct-20 | <a href="https://covid-19.acgov.org/covid19-assets/docs/press/press-release-2020.10.13.pdf">https://covid-19.acgov.org/covid19-assets/docs/press/press-release-2020.10.13.pdf</a>                                                                                                                                                                                                                                                                                                                                                                                                     |

|         |           |                                                                                                                                                                                                                                                                                                                                                                                                                                                                                                                                                                                       |
|---------|-----------|---------------------------------------------------------------------------------------------------------------------------------------------------------------------------------------------------------------------------------------------------------------------------------------------------------------------------------------------------------------------------------------------------------------------------------------------------------------------------------------------------------------------------------------------------------------------------------------|
| Alameda | 21-Oct-20 | <a href="https://covid-19.acgov.org/covid19-assets/docs/shelter-in-place/20-15-social-distancing-eng.pdf">https://covid-19.acgov.org/covid19-assets/docs/shelter-in-place/20-15-social-distancing-eng.pdf</a>                                                                                                                                                                                                                                                                                                                                                                         |
| Alameda | 13-Nov-20 | <a href="https://www.cdph.ca.gov/Programs/CID/DCDC/Pages/COVID-19/Guidance-for-the-Prevention-of-COVID-19-Transmission-for-Gatherings-November-2020.aspx">https://www.cdph.ca.gov/Programs/CID/DCDC/Pages/COVID-19/Guidance-for-the-Prevention-of-COVID-19-Transmission-for-Gatherings-November-2020.aspx</a>                                                                                                                                                                                                                                                                         |
| Alameda | 16-Nov-20 | <a href="https://www.cdph.ca.gov/Programs/CID/DCDC/Pages/COVID-19/guidance-for-face-coverings.aspx">https://www.cdph.ca.gov/Programs/CID/DCDC/Pages/COVID-19/guidance-for-face-coverings.aspx</a>                                                                                                                                                                                                                                                                                                                                                                                     |
| Alameda | 17-Nov-20 | <a href="https://covid-19.acgov.org/covid19-assets/docs/shelter-in-place/20-15-social-distancing-eng.pdf">https://covid-19.acgov.org/covid19-assets/docs/shelter-in-place/20-15-social-distancing-eng.pdf</a>                                                                                                                                                                                                                                                                                                                                                                         |
| Alameda | 17-Nov-20 | <a href="https://covid-19.acgov.org/covid19-assets/docs/shelter-in-place/20-17-social-distancing-eng.pdf">https://covid-19.acgov.org/covid19-assets/docs/shelter-in-place/20-17-social-distancing-eng.pdf</a>                                                                                                                                                                                                                                                                                                                                                                         |
| Alameda | 19-Nov-20 | <a href="https://www.cdph.ca.gov/Programs/CID/DCDC/Pages/COVID-19/limited-stay-at-home-order.aspx">https://www.cdph.ca.gov/Programs/CID/DCDC/Pages/COVID-19/limited-stay-at-home-order.aspx</a>                                                                                                                                                                                                                                                                                                                                                                                       |
| Alameda | 20-Nov-20 | <a href="https://covid-19.acgov.org/covid19-assets/docs/shelter-in-place/joint-health-officer-order-mandating-flu-vaccination-2020.11.20.pdf">https://covid-19.acgov.org/covid19-assets/docs/shelter-in-place/joint-health-officer-order-mandating-flu-vaccination-2020.11.20.pdf</a>                                                                                                                                                                                                                                                                                                 |
| Alameda | 6-Dec-20  | <a href="https://covid-19.acgov.org/covid19-assets/docs/shelter-in-place/20-21-social-distancing-eng.pdf">https://covid-19.acgov.org/covid19-assets/docs/shelter-in-place/20-21-social-distancing-eng.pdf</a>                                                                                                                                                                                                                                                                                                                                                                         |
| Alameda | 16-Dec-20 | <a href="https://www.gov.ca.gov/wp-content/uploads/2020/12/12.3.20-Stay-at-Home-Order-ICU-Scenario.pdf">https://www.gov.ca.gov/wp-content/uploads/2020/12/12.3.20-Stay-at-Home-Order-ICU-Scenario.pdf</a>                                                                                                                                                                                                                                                                                                                                                                             |
| Alpine  | 9-Mar-20  | <a href="https://alpinecountyca.gov/DocumentCenter/View/2877">https://alpinecountyca.gov/DocumentCenter/View/2877</a>                                                                                                                                                                                                                                                                                                                                                                                                                                                                 |
| Alpine  | 12-Mar-20 | <a href="https://alpinecountyca.gov/DocumentCenter/View/2888">https://alpinecountyca.gov/DocumentCenter/View/2888</a>                                                                                                                                                                                                                                                                                                                                                                                                                                                                 |
| Alpine  | 16-Mar-20 | <a href="https://alpinecountyca.gov/DocumentCenter/View/2889">https://alpinecountyca.gov/DocumentCenter/View/2889</a>                                                                                                                                                                                                                                                                                                                                                                                                                                                                 |
| Alpine  | 19-Mar-20 | <a href="http://alpinecountyca.gov/DocumentCenter/View/2893">http://alpinecountyca.gov/DocumentCenter/View/2893</a>                                                                                                                                                                                                                                                                                                                                                                                                                                                                   |
| Alpine  | 19-Mar-20 | <a href="https://www.gov.ca.gov/wp-content/uploads/2020/03/3.19.20-attested-EO-N-33-20-COVID-19-HEALTH-ORDER.pdf">https://www.gov.ca.gov/wp-content/uploads/2020/03/3.19.20-attested-EO-N-33-20-COVID-19-HEALTH-ORDER.pdf</a>                                                                                                                                                                                                                                                                                                                                                         |
| Alpine  | 23-Mar-20 | <a href="http://alpinecountyca.gov/DocumentCenter/View/2910">http://alpinecountyca.gov/DocumentCenter/View/2910</a>                                                                                                                                                                                                                                                                                                                                                                                                                                                                   |
| Alpine  | 2-Apr-20  | <a href="http://alpinecountyca.gov/DocumentCenter/View/3289">http://alpinecountyca.gov/DocumentCenter/View/3289</a>                                                                                                                                                                                                                                                                                                                                                                                                                                                                   |
| Alpine  | 12-May-20 | <a href="http://alpinecountyca.gov/DocumentCenter/View/3346">http://alpinecountyca.gov/DocumentCenter/View/3346</a>                                                                                                                                                                                                                                                                                                                                                                                                                                                                   |
| Alpine  | 26-May-20 | <a href="https://www.kcra.com/article/california-eases-more-covid-19-restrictions-what-you-need-to-know/32664860">https://www.kcra.com/article/california-eases-more-covid-19-restrictions-what-you-need-to-know/32664860</a>                                                                                                                                                                                                                                                                                                                                                         |
| Alpine  | 10-Jun-20 | <a href="http://alpinecountyca.gov/DocumentCenter/View/3397">http://alpinecountyca.gov/DocumentCenter/View/3397</a>                                                                                                                                                                                                                                                                                                                                                                                                                                                                   |
| Alpine  | 12-Jun-20 | <a href="http://alpinecountyca.gov/DocumentCenter/View/3402">http://alpinecountyca.gov/DocumentCenter/View/3402</a>                                                                                                                                                                                                                                                                                                                                                                                                                                                                   |
| Alpine  | 18-Jun-20 | <a href="https://www.cdph.ca.gov/Programs/CID/DCDC/CDPH%20Document%20Library/COVID-19/Guidance-for-Face-Coverings_06-18-2020.pdf">https://www.cdph.ca.gov/Programs/CID/DCDC/CDPH%20Document%20Library/COVID-19/Guidance-for-Face-Coverings_06-18-2020.pdf</a>                                                                                                                                                                                                                                                                                                                         |
| Alpine  | 19-Jun-20 | <a href="https://apnews.com/e0b91103b33ff3896c89d0845f5b7bcf">https://apnews.com/e0b91103b33ff3896c89d0845f5b7bcf</a>                                                                                                                                                                                                                                                                                                                                                                                                                                                                 |
| Alpine  | 29-Jun-20 | <a href="http://alpinecountyca.gov/DocumentCenter/View/3425">http://alpinecountyca.gov/DocumentCenter/View/3425</a>                                                                                                                                                                                                                                                                                                                                                                                                                                                                   |
| Alpine  | 13-Jul-20 | <a href="https://www.latimes.com/california/story/2020-07-13/newsom-california-county-rollback-reopening-coronavirus">https://www.latimes.com/california/story/2020-07-13/newsom-california-county-rollback-reopening-coronavirus</a>                                                                                                                                                                                                                                                                                                                                                 |
| Alpine  | 18-Aug-20 | <a href="http://alpinecountyca.gov/DocumentCenter/View/3541">http://alpinecountyca.gov/DocumentCenter/View/3541</a>                                                                                                                                                                                                                                                                                                                                                                                                                                                                   |
| Alpine  | 28-Aug-20 | <a href="http://alpinecountyca.gov/DocumentCenter/View/3551">http://alpinecountyca.gov/DocumentCenter/View/3551</a>                                                                                                                                                                                                                                                                                                                                                                                                                                                                   |
| Alpine  | 9-Oct-20  | <a href="https://wp.sbcounty.gov/cao/countywire/?p=9160#:~:text=Private%20outdoor%20gatherings%20of%20three%20households%20now%20allowed%20throughout%20the%20county%2C%20state,-Published%20October%209&amp;text=Private%20outdoor%20gatherings%20of%20people,Gavin%20Newsom%20on%20Friday.">https://wp.sbcounty.gov/cao/countywire/?p=9160#:~:text=Private%20outdoor%20gatherings%20of%20three%20households%20now%20allowed%20throughout%20the%20county%2C%20state,-Published%20October%209&amp;text=Private%20outdoor%20gatherings%20of%20people,Gavin%20Newsom%20on%20Friday.</a> |
| Alpine  | 13-Nov-20 | <a href="https://www.cdph.ca.gov/Programs/CID/DCDC/Pages/COVID-19/Guidance-for-the-Prevention-of-COVID-19-Transmission-for-Gatherings-November-2020.aspx">https://www.cdph.ca.gov/Programs/CID/DCDC/Pages/COVID-19/Guidance-for-the-Prevention-of-COVID-19-Transmission-for-Gatherings-November-2020.aspx</a>                                                                                                                                                                                                                                                                         |

|        |           |                                                                                                                                                                                                                                                               |
|--------|-----------|---------------------------------------------------------------------------------------------------------------------------------------------------------------------------------------------------------------------------------------------------------------|
| Alpine | 16-Nov-20 | <a href="https://www.cdph.ca.gov/Programs/CID/DCDC/Pages/COVID-19/guidance-for-face-coverings.aspx">https://www.cdph.ca.gov/Programs/CID/DCDC/Pages/COVID-19/guidance-for-face-coverings.aspx</a>                                                             |
| Alpine | 24-Nov-20 | <a href="http://alpinecountyca.gov/DocumentCenter/View/3973/ACPHB-orange-tier-112420?bidId=">http://alpinecountyca.gov/DocumentCenter/View/3973/ACPHB-orange-tier-112420?bidId=</a>                                                                           |
| Alpine | 28-Nov-20 | <a href="https://southtahoenow.com/story/11/28/2020/alpine-county-moves-red-tier">https://southtahoenow.com/story/11/28/2020/alpine-county-moves-red-tier</a>                                                                                                 |
| Alpine | 9-Dec-20  | <a href="https://www.gov.ca.gov/wp-content/uploads/2020/12/12.3.20-Stay-at-Home-Order-ICU-Scenario.pdf">https://www.gov.ca.gov/wp-content/uploads/2020/12/12.3.20-Stay-at-Home-Order-ICU-Scenario.pdf</a>                                                     |
| Amador | 12-Mar-20 | <a href="https://www.amadorgov.org/home/showdocument?id=34799">https://www.amadorgov.org/home/showdocument?id=34799</a>                                                                                                                                       |
| Amador | 12-Mar-20 | <a href="https://www.amadorgov.org/home/showdocument?id=34801">https://www.amadorgov.org/home/showdocument?id=34801</a>                                                                                                                                       |
| Amador | 13-Mar-20 | <a href="https://www.amadorgov.org/home/showdocument?id=34803">https://www.amadorgov.org/home/showdocument?id=34803</a>                                                                                                                                       |
| Amador | 19-Mar-20 | <a href="https://www.gov.ca.gov/wp-content/uploads/2020/03/3.19.20-attested-EO-N-33-20-COVID-19-HEALTH-ORDER.pdf">https://www.gov.ca.gov/wp-content/uploads/2020/03/3.19.20-attested-EO-N-33-20-COVID-19-HEALTH-ORDER.pdf</a>                                 |
| Amador | 20-Mar-20 | <a href="https://www.amadorgov.org/Home/Components/News/News/794/16?arch=1">https://www.amadorgov.org/Home/Components/News/News/794/16?arch=1</a>                                                                                                             |
| Amador | 20-Mar-20 | <a href="https://www.amadorgov.org/home/showdocument?id=34911">https://www.amadorgov.org/home/showdocument?id=34911</a>                                                                                                                                       |
| Amador | 27-Mar-20 | <a href="https://www.amadorgov.org/home/showdocument?id=34967">https://www.amadorgov.org/home/showdocument?id=34967</a>                                                                                                                                       |
| Amador | 30-Mar-20 | <a href="https://www.amadorgov.org/home/showdocument?id=35013">https://www.amadorgov.org/home/showdocument?id=35013</a>                                                                                                                                       |
| Amador | 3-Apr-20  | <a href="https://www.amadorgov.org/services/public-health">https://www.amadorgov.org/services/public-health</a>                                                                                                                                               |
| Amador | 30-Apr-20 | <a href="https://www.amadorgov.org/home/showdocument?id=36290">https://www.amadorgov.org/home/showdocument?id=36290</a>                                                                                                                                       |
| Amador | 4-May-20  | <a href="https://www.amadorgov.org/home/showdocument?id=36320">https://www.amadorgov.org/home/showdocument?id=36320</a>                                                                                                                                       |
| Amador | 7-May-20  | <a href="https://www.amadorgov.org/home/showdocument?id=36392">https://www.amadorgov.org/home/showdocument?id=36392</a>                                                                                                                                       |
| Amador | 8-May-20  | <a href="https://www.amadorgov.org/home/showdocument?id=36424">https://www.amadorgov.org/home/showdocument?id=36424</a>                                                                                                                                       |
| Amador | 10-May-20 | <a href="https://www.amadorgov.org/home/showdocument?id=36469">https://www.amadorgov.org/home/showdocument?id=36469</a>                                                                                                                                       |
| Amador | 12-May-20 | <a href="https://www.amadorgov.org/home/showdocument?id=36495">https://www.amadorgov.org/home/showdocument?id=36495</a>                                                                                                                                       |
| Amador | 15-May-20 | <a href="https://www.amadorgov.org/home/showdocument?id=36527">https://www.amadorgov.org/home/showdocument?id=36527</a>                                                                                                                                       |
| Amador | 25-May-20 | <a href="https://www.amadorgov.org/Home/Components/News/News/874/16?arch=1">https://www.amadorgov.org/Home/Components/News/News/874/16?arch=1</a>                                                                                                             |
| Amador | 26-May-20 | <a href="https://www.amadorgov.org/home/showdocument?id=36623">https://www.amadorgov.org/home/showdocument?id=36623</a>                                                                                                                                       |
| Amador | 5-Jun-20  | <a href="https://www.amadorgov.org/Home/Components/News/News/888/16?arch=1">https://www.amadorgov.org/Home/Components/News/News/888/16?arch=1</a>                                                                                                             |
| Amador | 12-Jun-20 | <a href="https://www.amadorgov.org/Home/Components/News/News/894/16?arch=1">https://www.amadorgov.org/Home/Components/News/News/894/16?arch=1</a>                                                                                                             |
| Amador | 18-Jun-20 | <a href="https://www.cdph.ca.gov/Programs/CID/DCDC/CDPH%20Document%20Library/COVID-19/Guidance-for-Face-Coverings_06-18-2020.pdf">https://www.cdph.ca.gov/Programs/CID/DCDC/CDPH%20Document%20Library/COVID-19/Guidance-for-Face-Coverings_06-18-2020.pdf</a> |
| Amador | 13-Jul-20 | <a href="https://www.amadorgov.org/Home/Components/News/News/934/16">https://www.amadorgov.org/Home/Components/News/News/934/16</a>                                                                                                                           |
| Amador | 17-Aug-20 | <a href="https://www.amadorgov.org/Home/Components/News/News/960/16">https://www.amadorgov.org/Home/Components/News/News/960/16</a>                                                                                                                           |
| Amador | 28-Aug-20 | <a href="https://abc7news.com/ca-reopneing-phases-covid19cagov-gavin-newsom-update-california-salon-reopening/6393805/">https://abc7news.com/ca-reopneing-phases-covid19cagov-gavin-newsom-update-california-salon-reopening/6393805/</a>                     |

|        |           |                                                                                                                                                                                                                                                                                                                                                                                                                                                                                                                                                                                       |
|--------|-----------|---------------------------------------------------------------------------------------------------------------------------------------------------------------------------------------------------------------------------------------------------------------------------------------------------------------------------------------------------------------------------------------------------------------------------------------------------------------------------------------------------------------------------------------------------------------------------------------|
| Amador | 8-Sep-20  | <a href="https://projects.sfchronicle.com/2020/coronavirus-map/california-reopening/">https://projects.sfchronicle.com/2020/coronavirus-map/california-reopening/</a>                                                                                                                                                                                                                                                                                                                                                                                                                 |
| Amador | 29-Sep-20 | <a href="https://www.amadorgov.org/Home/Components/News/News/1006/16">https://www.amadorgov.org/Home/Components/News/News/1006/16</a>                                                                                                                                                                                                                                                                                                                                                                                                                                                 |
| Amador | 9-Oct-20  | <a href="https://wp.sbcounty.gov/cao/countywire/?p=9160#:~:text=Private%20outdoor%20gatherings%20of%20three%20households%20now%20allowed%20throughout%20the%20county%2C%20state,-Published%20October%209&amp;text=Private%20outdoor%20gatherings%20of%20people,Gavin%20Newsom%20on%20Friday.">https://wp.sbcounty.gov/cao/countywire/?p=9160#:~:text=Private%20outdoor%20gatherings%20of%20three%20households%20now%20allowed%20throughout%20the%20county%2C%20state,-Published%20October%209&amp;text=Private%20outdoor%20gatherings%20of%20people,Gavin%20Newsom%20on%20Friday.</a> |
| Amador | 10-Nov-20 | <a href="https://www.latimes.com/california/story/2020-11-10/california-coronavirus-cases-climb-more-counties-expected-stricter-reopenings">https://www.latimes.com/california/story/2020-11-10/california-coronavirus-cases-climb-more-counties-expected-stricter-reopenings</a>                                                                                                                                                                                                                                                                                                     |
| Amador | 13-Nov-20 | <a href="https://www.cdph.ca.gov/Programs/CID/DCDC/Pages/COVID-19/Guidance-for-the-Prevention-of-COVID-19-Transmission-for-Gatherings-November-2020.aspx">https://www.cdph.ca.gov/Programs/CID/DCDC/Pages/COVID-19/Guidance-for-the-Prevention-of-COVID-19-Transmission-for-Gatherings-November-2020.aspx</a>                                                                                                                                                                                                                                                                         |
| Amador | 16-Nov-20 | <a href="https://www.cdph.ca.gov/Programs/CID/DCDC/Pages/COVID-19/guidance-for-face-coverings.aspx">https://www.cdph.ca.gov/Programs/CID/DCDC/Pages/COVID-19/guidance-for-face-coverings.aspx</a>                                                                                                                                                                                                                                                                                                                                                                                     |
| Amador | 9-Dec-20  | <a href="https://www.gov.ca.gov/wp-content/uploads/2020/12/12.3.20-Stay-at-Home-Order-ICU-Scenario.pdf">https://www.gov.ca.gov/wp-content/uploads/2020/12/12.3.20-Stay-at-Home-Order-ICU-Scenario.pdf</a>                                                                                                                                                                                                                                                                                                                                                                             |
| Butte  | 6-Mar-20  | <a href="http://www.buttecounty.net/Portals/21/Admin/Media/ButteCountyDeclaresLocalCOVID19Emergency.pdf?ver=2020-03-06-062756-297">http://www.buttecounty.net/Portals/21/Admin/Media/ButteCountyDeclaresLocalCOVID19Emergency.pdf?ver=2020-03-06-062756-297</a>                                                                                                                                                                                                                                                                                                                       |
| Butte  | 19-Mar-20 | <a href="https://www.gov.ca.gov/wp-content/uploads/2020/03/3.19.20-attested-EO-N-33-20-COVID-19-HEALTH-ORDER.pdf">https://www.gov.ca.gov/wp-content/uploads/2020/03/3.19.20-attested-EO-N-33-20-COVID-19-HEALTH-ORDER.pdf</a>                                                                                                                                                                                                                                                                                                                                                         |
| Butte  | 21-Mar-20 | <a href="http://www.buttecounty.net/Portals/21/Admin/Media/BCPHFirstCOVIDCase.pdf?ver=2020-03-23-080643-827">http://www.buttecounty.net/Portals/21/Admin/Media/BCPHFirstCOVIDCase.pdf?ver=2020-03-23-080643-827</a>                                                                                                                                                                                                                                                                                                                                                                   |
| Butte  | 30-Apr-20 | <a href="http://www.buttecounty.net/Portals/21/Admin/Media/ButteCountyHealthOfficerUrgesFaceCoverings.pdf?ver=2020-04-30-130147-603">http://www.buttecounty.net/Portals/21/Admin/Media/ButteCountyHealthOfficerUrgesFaceCoverings.pdf?ver=2020-04-30-130147-603</a>                                                                                                                                                                                                                                                                                                                   |
| Butte  | 7-May-20  | <a href="https://www.cdph.ca.gov/Programs/CID/DCDC/CDPH%20Document%20Library/COVID-19/SHO%20Order%205-7-2020.pdf">https://www.cdph.ca.gov/Programs/CID/DCDC/CDPH%20Document%20Library/COVID-19/SHO%20Order%205-7-2020.pdf</a>                                                                                                                                                                                                                                                                                                                                                         |
| Butte  | 18-May-20 | <a href="https://www.latimes.com/california/story/2020-05-18/newsom-reopening-coronavirus-benchmark">https://www.latimes.com/california/story/2020-05-18/newsom-reopening-coronavirus-benchmark</a>                                                                                                                                                                                                                                                                                                                                                                                   |
| Butte  | 22-May-20 | <a href="http://www.buttecounty.net/Portals/21/Admin/Media/ButteCOVIDIncreases.pdf?ver=2020-05-22-080929-433">http://www.buttecounty.net/Portals/21/Admin/Media/ButteCOVIDIncreases.pdf?ver=2020-05-22-080929-433</a>                                                                                                                                                                                                                                                                                                                                                                 |
| Butte  | 26-May-20 | <a href="http://www.buttecounty.net/Portals/21/Admin/Media/ButteCountySalons_BarbershopsReopen.pdf?ver=2020-05-26-152337-340">http://www.buttecounty.net/Portals/21/Admin/Media/ButteCountySalons_BarbershopsReopen.pdf?ver=2020-05-26-152337-340</a>                                                                                                                                                                                                                                                                                                                                 |
| Butte  | 12-Jun-20 | <a href="http://www.buttecounty.net/publichealth/buttereopens">http://www.buttecounty.net/publichealth/buttereopens</a>                                                                                                                                                                                                                                                                                                                                                                                                                                                               |
| Butte  | 18-Jun-20 | <a href="https://www.cdph.ca.gov/Programs/CID/DCDC/CDPH%20Document%20Library/COVID-19/Guidance-for-Face-Coverings_06-18-2020.pdf">https://www.cdph.ca.gov/Programs/CID/DCDC/CDPH%20Document%20Library/COVID-19/Guidance-for-Face-Coverings_06-18-2020.pdf</a>                                                                                                                                                                                                                                                                                                                         |
| Butte  | 19-Jun-20 | <a href="https://www.sfchronicle.com/health/article/When-will-nail-salons-tattoo-parlors-reopen-in-15337063.php">https://www.sfchronicle.com/health/article/When-will-nail-salons-tattoo-parlors-reopen-in-15337063.php</a>                                                                                                                                                                                                                                                                                                                                                           |
| Butte  | 13-Jul-20 | <a href="http://www.buttecounty.net/Portals/21/Admin/Media/BCPHRollbacksEffectiveImmediately.pdf?ver=2020-07-14-132040-127">http://www.buttecounty.net/Portals/21/Admin/Media/BCPHRollbacksEffectiveImmediately.pdf?ver=2020-07-14-132040-127</a>                                                                                                                                                                                                                                                                                                                                     |
| Butte  | 22-Jul-20 | <a href="http://www.buttecounty.net/Portals/21/COVID-19/BCPHPressRelease07.22.20.pdf?ver=2020-07-22-141500-533">http://www.buttecounty.net/Portals/21/COVID-19/BCPHPressRelease07.22.20.pdf?ver=2020-07-22-141500-533</a>                                                                                                                                                                                                                                                                                                                                                             |
| Butte  | 28-Aug-20 | <a href="https://abc7news.com/ca-reopneing-phases-covid19cagov-gavin-newsom-update-california-salon-reopening/6393805/">https://abc7news.com/ca-reopneing-phases-covid19cagov-gavin-newsom-update-california-salon-reopening/6393805/</a>                                                                                                                                                                                                                                                                                                                                             |
| Butte  | 22-Sep-20 | <a href="https://files.covid19.ca.gov/pdf/guidance-expanded-personal-care-services--en.pdf">https://files.covid19.ca.gov/pdf/guidance-expanded-personal-care-services--en.pdf</a>                                                                                                                                                                                                                                                                                                                                                                                                     |
| Butte  | 29-Sep-20 | <a href="https://www.actionnewsnow.com/content/news/Butte-County-moves-out-of-states-most-restrictive-COVID-19-tier-572577531.html">https://www.actionnewsnow.com/content/news/Butte-County-moves-out-of-states-most-restrictive-COVID-19-tier-572577531.html</a>                                                                                                                                                                                                                                                                                                                     |
| Butte  | 9-Oct-20  | <a href="https://wp.sbcounty.gov/cao/countywire/?p=9160#:~:text=Private%20outdoor%20gatherings%20of%20three%20households%20now%20allowed%20throughout%20the%20county%2C%20state,-Published%20October%209&amp;text=Private%20outdoor%20gatherings%20of%20people,Gavin%20Newsom%20on%20Friday.">https://wp.sbcounty.gov/cao/countywire/?p=9160#:~:text=Private%20outdoor%20gatherings%20of%20three%20households%20now%20allowed%20throughout%20the%20county%2C%20state,-Published%20October%209&amp;text=Private%20outdoor%20gatherings%20of%20people,Gavin%20Newsom%20on%20Friday.</a> |
| Butte  | 20-Oct-20 | <a href="http://www.buttecounty.net/publichealth/buttereopens">http://www.buttecounty.net/publichealth/buttereopens</a>                                                                                                                                                                                                                                                                                                                                                                                                                                                               |
| Butte  | 13-Nov-20 | <a href="https://www.cdph.ca.gov/Programs/CID/DCDC/Pages/COVID-19/Guidance-for-the-Prevention-of-COVID-19-Transmission-for-Gatherings-November-2020.aspx">https://www.cdph.ca.gov/Programs/CID/DCDC/Pages/COVID-19/Guidance-for-the-Prevention-of-COVID-19-Transmission-for-Gatherings-November-2020.aspx</a>                                                                                                                                                                                                                                                                         |
| Butte  | 16-Nov-20 | <a href="https://www.cdph.ca.gov/Programs/CID/DCDC/Pages/COVID-19/guidance-for-face-coverings.aspx">https://www.cdph.ca.gov/Programs/CID/DCDC/Pages/COVID-19/guidance-for-face-coverings.aspx</a>                                                                                                                                                                                                                                                                                                                                                                                     |
| Butte  | 17-Nov-20 | <a href="https://kmph.com/news/local/40-california-counties-in-purple-tier-including-the-central-valley">https://kmph.com/news/local/40-california-counties-in-purple-tier-including-the-central-valley</a>                                                                                                                                                                                                                                                                                                                                                                           |

|           |           |                                                                                                                                                                                                                                                                                                                                                                                                                                                                                                                                                                                       |
|-----------|-----------|---------------------------------------------------------------------------------------------------------------------------------------------------------------------------------------------------------------------------------------------------------------------------------------------------------------------------------------------------------------------------------------------------------------------------------------------------------------------------------------------------------------------------------------------------------------------------------------|
| Butte     | 19-Nov-20 | <a href="https://www.cdph.ca.gov/Programs/CID/DCDC/Pages/COVID-19/limited-stay-at-home-order.aspx">https://www.cdph.ca.gov/Programs/CID/DCDC/Pages/COVID-19/limited-stay-at-home-order.aspx</a>                                                                                                                                                                                                                                                                                                                                                                                       |
| Butte     | 9-Dec-20  | <a href="https://www.gov.ca.gov/wp-content/uploads/2020/12/12.3.20-Stay-at-Home-Order-ICU-Scenario.pdf">https://www.gov.ca.gov/wp-content/uploads/2020/12/12.3.20-Stay-at-Home-Order-ICU-Scenario.pdf</a>                                                                                                                                                                                                                                                                                                                                                                             |
| Butte     | 14-Dec-20 | <a href="http://www.buttecounty.net/Portals/21/Admin/Media/PublicHealthPrioritizesContactTracing.pdf?ver=2020-12-14-140512-250">http://www.buttecounty.net/Portals/21/Admin/Media/PublicHealthPrioritizesContactTracing.pdf?ver=2020-12-14-140512-250</a>                                                                                                                                                                                                                                                                                                                             |
| Calaveras | 10-Mar-20 | file:///C:/Users/Erin%20Holsinger/Downloads/Snapshot-28860.pdf                                                                                                                                                                                                                                                                                                                                                                                                                                                                                                                        |
| Calaveras | 19-Mar-20 | <a href="https://www.gov.ca.gov/wp-content/uploads/2020/03/3.19.20-attested-EO-N-33-20-COVID-19-HEALTH-ORDER.pdf">https://www.gov.ca.gov/wp-content/uploads/2020/03/3.19.20-attested-EO-N-33-20-COVID-19-HEALTH-ORDER.pdf</a>                                                                                                                                                                                                                                                                                                                                                         |
| Calaveras | 26-Mar-20 | <a href="https://web.archive.org/web/20200331215709/https://covid19.calaverasgov.us/Portals/COVID19/Documents/Other%20Documents/Covid-19%20Health%20Officer%20Orders%203-26-2020.pdf?ver=2020-03-26-153838-123">https://web.archive.org/web/20200331215709/https://covid19.calaverasgov.us/Portals/COVID19/Documents/Other%20Documents/Covid-19%20Health%20Officer%20Orders%203-26-2020.pdf?ver=2020-03-26-153838-123</a>                                                                                                                                                             |
| Calaveras | 27-Mar-20 | <a href="https://web.archive.org/web/20200331215717/https://covid19.calaverasgov.us/Portals/COVID19/Documents/Press%20Releases/Public%20Health%20Officer%20Order%203-27-2020.pdf?ver=2020-03-27-160710-863">https://web.archive.org/web/20200331215717/https://covid19.calaverasgov.us/Portals/COVID19/Documents/Press%20Releases/Public%20Health%20Officer%20Order%203-27-2020.pdf?ver=2020-03-27-160710-863</a>                                                                                                                                                                     |
| Calaveras | 29-Apr-20 | <a href="http://www.calaverasenterprise.com/news/coronavirus_information/article_292cce68-947f-11ea-a37c-2f0f1adbbd78.html">http://www.calaverasenterprise.com/news/coronavirus_information/article_292cce68-947f-11ea-a37c-2f0f1adbbd78.html</a>                                                                                                                                                                                                                                                                                                                                     |
| Calaveras | 6-May-20  | <a href="http://www.calaverasenterprise.com/news/coronavirus_information/article_afd33998-8fe3-11ea-935e-cbafd4a35af6.html">http://www.calaverasenterprise.com/news/coronavirus_information/article_afd33998-8fe3-11ea-935e-cbafd4a35af6.html</a>                                                                                                                                                                                                                                                                                                                                     |
| Calaveras | 8-May-20  | <a href="https://web.archive.org/web/20200515154442/https://covid19.calaverasgov.us/LinkClick.aspx?fileticket=jVxbAjs7LQ0%3d&amp;portalid=57">https://web.archive.org/web/20200515154442/https://covid19.calaverasgov.us/LinkClick.aspx?fileticket=jVxbAjs7LQ0%3d&amp;portalid=57</a>                                                                                                                                                                                                                                                                                                 |
| Calaveras | 13-May-20 | <a href="http://www.calaverasenterprise.com/news/coronavirus_information/article_da41af68-9577-11ea-afdd-fb8bc483a30b.html">http://www.calaverasenterprise.com/news/coronavirus_information/article_da41af68-9577-11ea-afdd-fb8bc483a30b.html</a>                                                                                                                                                                                                                                                                                                                                     |
| Calaveras | 27-May-20 | <a href="http://www.calaverasenterprise.com/news/coronavirus_information/article_d5426878-a0a7-11ea-8401-8768ab598ffd.html">http://www.calaverasenterprise.com/news/coronavirus_information/article_d5426878-a0a7-11ea-8401-8768ab598ffd.html</a>                                                                                                                                                                                                                                                                                                                                     |
| Calaveras | 12-Jun-20 | <a href="http://thepinetree.net/new/?p=102199">http://thepinetree.net/new/?p=102199</a>                                                                                                                                                                                                                                                                                                                                                                                                                                                                                               |
| Calaveras | 15-Jun-20 | <a href="http://www.calaverasenterprise.com/news/coronavirus_information/article_a96937d8-af5a-11ea-ad58-df70b1339363.html">http://www.calaverasenterprise.com/news/coronavirus_information/article_a96937d8-af5a-11ea-ad58-df70b1339363.html</a>                                                                                                                                                                                                                                                                                                                                     |
| Calaveras | 18-Jun-20 | <a href="https://www.cdph.ca.gov/Programs/CID/DCDC/CDPH%20Document%20Library/COVID-19/Guidance-for-Face-Coverings_06-18-2020.pdf">https://www.cdph.ca.gov/Programs/CID/DCDC/CDPH%20Document%20Library/COVID-19/Guidance-for-Face-Coverings_06-18-2020.pdf</a>                                                                                                                                                                                                                                                                                                                         |
| Calaveras | 13-Jul-20 | <a href="https://www.latimes.com/california/story/2020-07-13/newsom-california-county-rollback-reopening-coronavirus">https://www.latimes.com/california/story/2020-07-13/newsom-california-county-rollback-reopening-coronavirus</a>                                                                                                                                                                                                                                                                                                                                                 |
| Calaveras | 17-Aug-20 | <a href="https://www.desertsun.com/story/news/2020/08/17/california-adds-5-counties-covid-19-monitoring-list-drops-1/3386719001/">https://www.desertsun.com/story/news/2020/08/17/california-adds-5-counties-covid-19-monitoring-list-drops-1/3386719001/</a>                                                                                                                                                                                                                                                                                                                         |
| Calaveras | 28-Aug-20 | <a href="https://projects.sfchronicle.com/2020/coronavirus-map/california-reopening/">https://projects.sfchronicle.com/2020/coronavirus-map/california-reopening/</a>                                                                                                                                                                                                                                                                                                                                                                                                                 |
| Calaveras | 29-Sep-20 | <a href="https://www.mymotherlode.com/news/local/1286492/calaveras-county-moves-to-moderate-risk-on-states-4-tier-covid-19-system.html">https://www.mymotherlode.com/news/local/1286492/calaveras-county-moves-to-moderate-risk-on-states-4-tier-covid-19-system.html</a>                                                                                                                                                                                                                                                                                                             |
| Calaveras | 9-Oct-20  | <a href="https://wp.sbcounty.gov/cao/countywire/?p=9160#:~:text=Private%20outdoor%20gatherings%20of%20three%20households%20now%20allowed%20throughout%20the%20county%2C%20state,-Published%20October%209&amp;text=Private%20outdoor%20gatherings%20of%20people,Gavin%20Newsom%20on%20Friday.">https://wp.sbcounty.gov/cao/countywire/?p=9160#:~:text=Private%20outdoor%20gatherings%20of%20three%20households%20now%20allowed%20throughout%20the%20county%2C%20state,-Published%20October%209&amp;text=Private%20outdoor%20gatherings%20of%20people,Gavin%20Newsom%20on%20Friday.</a> |
| Calaveras | 27-Oct-20 | <a href="http://www.calaverasenterprise.com/news/article_ce6266ea-1945-11eb-8394-d7d4214273f5.html">http://www.calaverasenterprise.com/news/article_ce6266ea-1945-11eb-8394-d7d4214273f5.html</a>                                                                                                                                                                                                                                                                                                                                                                                     |
| Calaveras | 13-Nov-20 | <a href="https://www.cdph.ca.gov/Programs/CID/DCDC/Pages/COVID-19/Guidance-for-the-Prevention-of-COVID-19-Transmission-for-Gatherings-November-2020.aspx">https://www.cdph.ca.gov/Programs/CID/DCDC/Pages/COVID-19/Guidance-for-the-Prevention-of-COVID-19-Transmission-for-Gatherings-November-2020.aspx</a>                                                                                                                                                                                                                                                                         |
| Calaveras | 16-Nov-20 | <a href="https://www.cdph.ca.gov/Programs/CID/DCDC/Pages/COVID-19/guidance-for-face-coverings.aspx">https://www.cdph.ca.gov/Programs/CID/DCDC/Pages/COVID-19/guidance-for-face-coverings.aspx</a>                                                                                                                                                                                                                                                                                                                                                                                     |
| Calaveras | 17-Nov-20 | <a href="https://kmpb.com/news/local/40-california-counties-in-purple-tier-including-the-central-valley">https://kmpb.com/news/local/40-california-counties-in-purple-tier-including-the-central-valley</a>                                                                                                                                                                                                                                                                                                                                                                           |
| Calaveras | 24-Nov-20 | <a href="https://www.kcra.com/article/california-covid-tiers-update-nov-24/34774234">https://www.kcra.com/article/california-covid-tiers-update-nov-24/34774234</a>                                                                                                                                                                                                                                                                                                                                                                                                                   |
| Calaveras | 28-Nov-20 | <a href="http://www.calaverasenterprise.com/news/coronavirus_information/article_eefe8da0-31ed-11eb-98a7-bf23fd8bc4ea.html">http://www.calaverasenterprise.com/news/coronavirus_information/article_eefe8da0-31ed-11eb-98a7-bf23fd8bc4ea.html</a>                                                                                                                                                                                                                                                                                                                                     |
| Calaveras | 5-Dec-20  | <a href="https://www.gov.ca.gov/wp-content/uploads/2020/12/12.3.20-Stay-at-Home-Order-ICU-Scenario.pdf">https://www.gov.ca.gov/wp-content/uploads/2020/12/12.3.20-Stay-at-Home-Order-ICU-Scenario.pdf</a>                                                                                                                                                                                                                                                                                                                                                                             |
| Colusa    | 18-Mar-20 | <a href="https://www.appeal-democrat.com/news/urgent/local-news-briefs-march-20-2020/article_7aa77aca-6a6a-11ea-a85b-9784db84ea15.html">https://www.appeal-democrat.com/news/urgent/local-news-briefs-march-20-2020/article_7aa77aca-6a6a-11ea-a85b-9784db84ea15.html</a>                                                                                                                                                                                                                                                                                                             |

|              |           |                                                                                                                                                                                                                                                                                                                                                                                                                                                                                                                                                                                       |
|--------------|-----------|---------------------------------------------------------------------------------------------------------------------------------------------------------------------------------------------------------------------------------------------------------------------------------------------------------------------------------------------------------------------------------------------------------------------------------------------------------------------------------------------------------------------------------------------------------------------------------------|
| Colusa       | 19-Mar-20 | <a href="https://www.gov.ca.gov/wp-content/uploads/2020/03/3.19.20-attested-EO-N-33-20-COVID-19-HEALTH-ORDER.pdf">https://www.gov.ca.gov/wp-content/uploads/2020/03/3.19.20-attested-EO-N-33-20-COVID-19-HEALTH-ORDER.pdf</a>                                                                                                                                                                                                                                                                                                                                                         |
| Colusa       | 8-May-20  | <a href="https://www.countyofcolusa.org/DocumentCenter/View/12402/Colusa-County-Phased-Opening-Plan-Vs-9-5-12-20">https://www.countyofcolusa.org/DocumentCenter/View/12402/Colusa-County-Phased-Opening-Plan-Vs-9-5-12-20</a>                                                                                                                                                                                                                                                                                                                                                         |
| Colusa       | 13-May-20 | <a href="https://www.countyofcolusa.org/DocumentCenter/View/12403/PressRelease-ReopeningPlan-V03">https://www.countyofcolusa.org/DocumentCenter/View/12403/PressRelease-ReopeningPlan-V03</a>                                                                                                                                                                                                                                                                                                                                                                                         |
| Colusa       | 26-May-20 | <a href="https://www.kcra.com/article/california-eases-more-covid-19-restrictions-what-you-need-to-know/32664860">https://www.kcra.com/article/california-eases-more-covid-19-restrictions-what-you-need-to-know/32664860</a>                                                                                                                                                                                                                                                                                                                                                         |
| Colusa       | 28-May-20 | <a href="https://htv-prod-media.s3.amazonaws.com/files/reopened-052720-final-1590706810.pdf">https://htv-prod-media.s3.amazonaws.com/files/reopened-052720-final-1590706810.pdf</a>                                                                                                                                                                                                                                                                                                                                                                                                   |
| Colusa       | 18-Jun-20 | <a href="https://www.cdph.ca.gov/Programs/CID/DCDC/CDPH%20Document%20Library/COVID-19/Guidance-for-Face-Coverings_06-18-2020.pdf">https://www.cdph.ca.gov/Programs/CID/DCDC/CDPH%20Document%20Library/COVID-19/Guidance-for-Face-Coverings_06-18-2020.pdf</a>                                                                                                                                                                                                                                                                                                                         |
| Colusa       | 30-Jun-20 | <a href="http://www.countyofcolusa.org/DocumentCenter/View/12614/PR---CommunityHealth_063020_FINAL">http://www.countyofcolusa.org/DocumentCenter/View/12614/PR---CommunityHealth_063020_FINAL</a>                                                                                                                                                                                                                                                                                                                                                                                     |
| Colusa       | 9-Jul-20  | <a href="http://www.countyofcolusa.org/DocumentCenter/View/12640/Order-Closing-Indoor-Services-and-Sectors-Colusa-7920">http://www.countyofcolusa.org/DocumentCenter/View/12640/Order-Closing-Indoor-Services-and-Sectors-Colusa-7920</a>                                                                                                                                                                                                                                                                                                                                             |
| Colusa       | 13-Jul-20 | <a href="https://covid19.ca.gov/roadmap-counties/">https://covid19.ca.gov/roadmap-counties/</a>                                                                                                                                                                                                                                                                                                                                                                                                                                                                                       |
| Colusa       | 17-Jul-20 | <a href="https://www.cdph.ca.gov/Programs/CID/DCDC/CDPH%20Document%20Library/COVID-19/Schools%20Reopening%20Recommendations.pdf">https://www.cdph.ca.gov/Programs/CID/DCDC/CDPH%20Document%20Library/COVID-19/Schools%20Reopening%20Recommendations.pdf</a>                                                                                                                                                                                                                                                                                                                           |
| Colusa       | 5-Aug-20  | <a href="http://www.countyofcolusa.org/DocumentCenter/View/12723/Masking-order-final?bidId=">http://www.countyofcolusa.org/DocumentCenter/View/12723/Masking-order-final?bidId=</a>                                                                                                                                                                                                                                                                                                                                                                                                   |
| Colusa       | 28-Aug-20 | <a href="https://abc7news.com/ca-reopneing-phases-covid19cagov-gavin-newsom-update-california-salon-reopening/6393805/">https://abc7news.com/ca-reopneing-phases-covid19cagov-gavin-newsom-update-california-salon-reopening/6393805/</a>                                                                                                                                                                                                                                                                                                                                             |
| Colusa       | 22-Sep-20 | <a href="https://files.covid19.ca.gov/pdf/guidance-expanded-personal-care-services--en.pdf">https://files.covid19.ca.gov/pdf/guidance-expanded-personal-care-services--en.pdf</a>                                                                                                                                                                                                                                                                                                                                                                                                     |
| Colusa       | 9-Oct-20  | <a href="https://wp.sbcounty.gov/cao/countywire/?p=9160#:~:text=Private%20outdoor%20gatherings%20of%20three%20households%20now%20allowed%20throughout%20the%20county%2C%20state,-Published%20October%209&amp;text=Private%20outdoor%20gatherings%20of%20people,Gavin%20Newsom%20on%20Friday.">https://wp.sbcounty.gov/cao/countywire/?p=9160#:~:text=Private%20outdoor%20gatherings%20of%20three%20households%20now%20allowed%20throughout%20the%20county%2C%20state,-Published%20October%209&amp;text=Private%20outdoor%20gatherings%20of%20people,Gavin%20Newsom%20on%20Friday.</a> |
| Colusa       | 13-Oct-20 | <a href="https://www.countyofcolusa.org/DocumentCenter/View/13136/PSA_RedTier_101320_FINAL">https://www.countyofcolusa.org/DocumentCenter/View/13136/PSA_RedTier_101320_FINAL</a>                                                                                                                                                                                                                                                                                                                                                                                                     |
| Colusa       | 4-Nov-20  | <a href="https://www.kcra.com/article/californias-covid-tiers-update-will-happen-nov-4/34564799">https://www.kcra.com/article/californias-covid-tiers-update-will-happen-nov-4/34564799</a>                                                                                                                                                                                                                                                                                                                                                                                           |
| Colusa       | 13-Nov-20 | <a href="https://www.cdph.ca.gov/Programs/CID/DCDC/Pages/COVID-19/Guidance-for-the-Prevention-of-COVID-19-Transmission-for-Gatherings-November-2020.aspx">https://www.cdph.ca.gov/Programs/CID/DCDC/Pages/COVID-19/Guidance-for-the-Prevention-of-COVID-19-Transmission-for-Gatherings-November-2020.aspx</a>                                                                                                                                                                                                                                                                         |
| Colusa       | 16-Nov-20 | <a href="https://www.cdph.ca.gov/Programs/CID/DCDC/Pages/COVID-19/guidance-for-face-coverings.aspx">https://www.cdph.ca.gov/Programs/CID/DCDC/Pages/COVID-19/guidance-for-face-coverings.aspx</a>                                                                                                                                                                                                                                                                                                                                                                                     |
| Colusa       | 17-Nov-20 | <a href="https://kmpb.com/news/local/40-california-counties-in-purple-tier-including-the-central-valley">https://kmpb.com/news/local/40-california-counties-in-purple-tier-including-the-central-valley</a>                                                                                                                                                                                                                                                                                                                                                                           |
| Colusa       | 24-Nov-20 | <a href="https://www.kcra.com/article/california-covid-tiers-update-nov-24/34774234">https://www.kcra.com/article/california-covid-tiers-update-nov-24/34774234</a>                                                                                                                                                                                                                                                                                                                                                                                                                   |
| Colusa       | 9-Dec-20  | <a href="https://www.gov.ca.gov/wp-content/uploads/2020/12/12.3.20-Stay-at-Home-Order-ICU-Scenario.pdf">https://www.gov.ca.gov/wp-content/uploads/2020/12/12.3.20-Stay-at-Home-Order-ICU-Scenario.pdf</a>                                                                                                                                                                                                                                                                                                                                                                             |
| Contra Costa | 10-Mar-20 | <a href="https://www.contracosta.ca.gov/DocumentCenter/View/64413/Contra-Costa-County-Issues-Proclamation-of-Emergency-News-Release-3102020">https://www.contracosta.ca.gov/DocumentCenter/View/64413/Contra-Costa-County-Issues-Proclamation-of-Emergency-News-Release-3102020</a>                                                                                                                                                                                                                                                                                                   |
| Contra Costa | 14-Mar-20 | <a href="https://813dcad3-2b07-4f3f-a25e-23c48c566922.filesusr.com/ugd/84606e_67dc6b956839487eb456679dd35f7fb2.pdf">https://813dcad3-2b07-4f3f-a25e-23c48c566922.filesusr.com/ugd/84606e_67dc6b956839487eb456679dd35f7fb2.pdf</a>                                                                                                                                                                                                                                                                                                                                                     |
| Contra Costa | 16-Mar-20 | <a href="https://813dcad3-2b07-4f3f-a25e-23c48c566922.filesusr.com/ugd/84606e_1870398d90a14bc09ff09bc944fcf71e.pdf">https://813dcad3-2b07-4f3f-a25e-23c48c566922.filesusr.com/ugd/84606e_1870398d90a14bc09ff09bc944fcf71e.pdf</a>                                                                                                                                                                                                                                                                                                                                                     |
| Contra Costa | 19-Mar-20 | <a href="https://www.gov.ca.gov/wp-content/uploads/2020/03/3.19.20-attested-EO-N-33-20-COVID-19-HEALTH-ORDER.pdf">https://www.gov.ca.gov/wp-content/uploads/2020/03/3.19.20-attested-EO-N-33-20-COVID-19-HEALTH-ORDER.pdf</a>                                                                                                                                                                                                                                                                                                                                                         |
| Contra Costa | 24-Mar-20 | <a href="https://813dcad3-2b07-4f3f-a25e-23c48c566922.filesusr.com/ugd/84606e_fd47967ff93844a4b57b311d29a03857.pdf">https://813dcad3-2b07-4f3f-a25e-23c48c566922.filesusr.com/ugd/84606e_fd47967ff93844a4b57b311d29a03857.pdf</a>                                                                                                                                                                                                                                                                                                                                                     |
| Contra Costa | 25-Mar-20 | <a href="https://patch.com/california/walnutcreek/contra-costa-county-school-closure-extended-through-may-1">https://patch.com/california/walnutcreek/contra-costa-county-school-closure-extended-through-may-1</a>                                                                                                                                                                                                                                                                                                                                                                   |

|              |           |                                                                                                                                                                                                                                                                                                                                                 |
|--------------|-----------|-------------------------------------------------------------------------------------------------------------------------------------------------------------------------------------------------------------------------------------------------------------------------------------------------------------------------------------------------|
| Contra Costa | 31-Mar-20 | <a href="https://cchealth.org/coronavirus/pdf/2020-0331-Health-Officer-Order-COVID19.pdf">https://cchealth.org/coronavirus/pdf/2020-0331-Health-Officer-Order-COVID19.pdf</a>                                                                                                                                                                   |
| Contra Costa | 17-Apr-20 | <a href="https://cchealth.org/press-releases/2020/0417-Cover-Your-Face-Order.php">https://cchealth.org/press-releases/2020/0417-Cover-Your-Face-Order.php</a>                                                                                                                                                                                   |
| Contra Costa | 29-Apr-20 | <a href="https://cchealth.org/press-releases/2020/0429-May-4-SIP-Order.pdf">https://cchealth.org/press-releases/2020/0429-May-4-SIP-Order.pdf</a>                                                                                                                                                                                               |
| Contra Costa | 1-May-20  | <a href="https://813dcad3-2b07-4f3f-a25e-23c48c566922.filesusr.com/ugd/84606e_33f7c66a64c3477fb7e7c211bddc386.pdf">https://813dcad3-2b07-4f3f-a25e-23c48c566922.filesusr.com/ugd/84606e_33f7c66a64c3477fb7e7c211bddc386.pdf</a>                                                                                                                 |
| Contra Costa | 15-May-20 | <a href="https://813dcad3-2b07-4f3f-a25e-23c48c566922.filesusr.com/ugd/84606e_79dd4c3c1f7a41228ffa022255c6b919.pdf">https://813dcad3-2b07-4f3f-a25e-23c48c566922.filesusr.com/ugd/84606e_79dd4c3c1f7a41228ffa022255c6b919.pdf</a>                                                                                                               |
| Contra Costa | 19-May-20 | <a href="https://www.kron4.com/news/bay-area/alameda-contra-costa-counties-begin-phase-2-of-reopening/">https://www.kron4.com/news/bay-area/alameda-contra-costa-counties-begin-phase-2-of-reopening/</a>                                                                                                                                       |
| Contra Costa | 29-May-20 | <a href="https://813dcad3-2b07-4f3f-a25e-23c48c566922.filesusr.com/ugd/84606e_bb12cecbe80a4e93986ed311b49f4ce6.pdf">https://813dcad3-2b07-4f3f-a25e-23c48c566922.filesusr.com/ugd/84606e_bb12cecbe80a4e93986ed311b49f4ce6.pdf</a>                                                                                                               |
| Contra Costa | 2-Jun-20  | <a href="https://cchealth.org/press-releases/2020/0602-Businesses-Reopening.php">https://cchealth.org/press-releases/2020/0602-Businesses-Reopening.php</a>                                                                                                                                                                                     |
| Contra Costa | 5-Jun-20  | <a href="https://cchealth.org/press-releases/2020/0605-Reopen-Outdoor-Dining-Pools-Religious-Services.php">https://cchealth.org/press-releases/2020/0605-Reopen-Outdoor-Dining-Pools-Religious-Services.php</a>                                                                                                                                 |
| Contra Costa | 9-Jun-20  | <a href="https://813dcad3-2b07-4f3f-a25e-23c48c566922.filesusr.com/ugd/84606e_31798530d8df468cbf2adaba4b404e44.pdf">https://813dcad3-2b07-4f3f-a25e-23c48c566922.filesusr.com/ugd/84606e_31798530d8df468cbf2adaba4b404e44.pdf</a>                                                                                                               |
| Contra Costa | 16-Jun-20 | <a href="https://813dcad3-2b07-4f3f-a25e-23c48c566922.filesusr.com/ugd/84606e_423b65646f8c4caf92722a938ee84c99.pdf">https://813dcad3-2b07-4f3f-a25e-23c48c566922.filesusr.com/ugd/84606e_423b65646f8c4caf92722a938ee84c99.pdf</a>                                                                                                               |
| Contra Costa | 18-Jun-20 | <a href="https://www.cdph.ca.gov/Programs/CID/DCDC/CDPH%20Document%20Library/COVID-19/Guidance-for-Face-Coverings_06-18-2020.pdf">https://www.cdph.ca.gov/Programs/CID/DCDC/CDPH%20Document%20Library/COVID-19/Guidance-for-Face-Coverings_06-18-2020.pdf</a>                                                                                   |
| Contra Costa | 26-Jun-20 | <a href="https://813dcad3-2b07-4f3f-a25e-23c48c566922.filesusr.com/ugd/84606e_0e966054b968442baa91cd366ead786c.pdf">https://813dcad3-2b07-4f3f-a25e-23c48c566922.filesusr.com/ugd/84606e_0e966054b968442baa91cd366ead786c.pdf</a>                                                                                                               |
| Contra Costa | 1-Jul-20  | <a href="https://abc7news.com/california-coronavirus-what-did-gavin-newsom-say-today-are-parks-open-in-counties-closed/6292195/">https://abc7news.com/california-coronavirus-what-did-gavin-newsom-say-today-are-parks-open-in-counties-closed/6292195/</a>                                                                                     |
| Contra Costa | 5-Jul-20  | <a href="https://813dcad3-2b07-4f3f-a25e-23c48c566922.filesusr.com/ugd/84606e_e943fec6e2814a6786b8a46d1383adb8.pdf">https://813dcad3-2b07-4f3f-a25e-23c48c566922.filesusr.com/ugd/84606e_e943fec6e2814a6786b8a46d1383adb8.pdf</a>                                                                                                               |
| Contra Costa | 5-Jul-20  | <a href="https://813dcad3-2b07-4f3f-a25e-23c48c566922.filesusr.com/ugd/84606e_eb60931d5c424c85b1d76ddd37c606e4.pdf">https://813dcad3-2b07-4f3f-a25e-23c48c566922.filesusr.com/ugd/84606e_eb60931d5c424c85b1d76ddd37c606e4.pdf</a>                                                                                                               |
| Contra Costa | 11-Jul-20 | <a href="https://813dcad3-2b07-4f3f-a25e-23c48c566922.filesusr.com/ugd/84606e_f1be93ac632a42e286de684d2b6aafa8.pdf">https://813dcad3-2b07-4f3f-a25e-23c48c566922.filesusr.com/ugd/84606e_f1be93ac632a42e286de684d2b6aafa8.pdf</a>                                                                                                               |
| Contra Costa | 13-Jul-20 | <a href="https://cchealth.org/press-releases/2020/0713-California-COVID-19-Closures.php">https://cchealth.org/press-releases/2020/0713-California-COVID-19-Closures.php</a>                                                                                                                                                                     |
| Contra Costa | 13-Jul-20 | <a href="https://cchealth.org/press-releases/2020/0713-California-COVID-19-Closures.php">https://cchealth.org/press-releases/2020/0713-California-COVID-19-Closures.php</a>                                                                                                                                                                     |
| Contra Costa | 14-Jul-20 | <a href="https://www.contracosta.ca.gov/DocumentCenter/View/67698/Board-of-Supervisors-Further-Extends-Eviction-Protection-and-Rent-Freeze-Ordinance-News-Release-7142020">https://www.contracosta.ca.gov/DocumentCenter/View/67698/Board-of-Supervisors-Further-Extends-Eviction-Protection-and-Rent-Freeze-Ordinance-News-Release-7142020</a> |
| Contra Costa | 17-Jul-20 | <a href="https://www.cdph.ca.gov/Programs/CID/DCDC/CDPH%20Document%20Library/COVID-19/Schools%20Reopening%20Recommendations.pdf">https://www.cdph.ca.gov/Programs/CID/DCDC/CDPH%20Document%20Library/COVID-19/Schools%20Reopening%20Recommendations.pdf</a>                                                                                     |
| Contra Costa | 28-Jul-20 | <a href="https://www.contracosta.ca.gov/DocumentCenter/View/67810/Contra-Costa-County-Passes-Urgency-Ordinance-Fines-for-Violations-of-Health-Orders-News-Release-7282020">https://www.contracosta.ca.gov/DocumentCenter/View/67810/Contra-Costa-County-Passes-Urgency-Ordinance-Fines-for-Violations-of-Health-Orders-News-Release-7282020</a> |
| Contra Costa | 5-Aug-20  | <a href="https://813dcad3-2b07-4f3f-a25e-23c48c566922.filesusr.com/ugd/84606e_8b365a78392143b081b07506195fc620.pdf">https://813dcad3-2b07-4f3f-a25e-23c48c566922.filesusr.com/ugd/84606e_8b365a78392143b081b07506195fc620.pdf</a>                                                                                                               |
| Contra Costa | 28-Aug-20 | <a href="https://www.cdph.ca.gov/Programs/CID/DCDC/CDPH%20Document%20Library/COVID-19/8-28-20_Order-Plan-Reducing-COVID19-Adjusting-Permitted-Sectors-Signed.pdf">https://www.cdph.ca.gov/Programs/CID/DCDC/CDPH%20Document%20Library/COVID-19/8-28-20_Order-Plan-Reducing-COVID19-Adjusting-Permitted-Sectors-Signed.pdf</a>                   |
| Contra Costa | 4-Sep-20  | <a href="https://813dcad3-2b07-4f3f-a25e-23c48c566922.filesusr.com/ugd/84606e_723a577fc51c4fb2a37eaf68ea00c236.pdf">https://813dcad3-2b07-4f3f-a25e-23c48c566922.filesusr.com/ugd/84606e_723a577fc51c4fb2a37eaf68ea00c236.pdf</a>                                                                                                               |
| Contra Costa | 14-Sep-20 | <a href="https://813dcad3-2b07-4f3f-a25e-23c48c566922.filesusr.com/ugd/84606e_d5c485d11a8840b3ad3fdb534c3285bc.pdf">https://813dcad3-2b07-4f3f-a25e-23c48c566922.filesusr.com/ugd/84606e_d5c485d11a8840b3ad3fdb534c3285bc.pdf</a>                                                                                                               |



|              |           |                                                                                                                                                                                                                                                                                                                                                                                                                                                                                                                                                                                       |
|--------------|-----------|---------------------------------------------------------------------------------------------------------------------------------------------------------------------------------------------------------------------------------------------------------------------------------------------------------------------------------------------------------------------------------------------------------------------------------------------------------------------------------------------------------------------------------------------------------------------------------------|
| Contra Costa | 22-Sep-20 | <a href="https://files.covid19.ca.gov/pdf/guidance-expanded-personal-care-services--en.pdf">https://files.covid19.ca.gov/pdf/guidance-expanded-personal-care-services--en.pdf</a>                                                                                                                                                                                                                                                                                                                                                                                                     |
| Contra Costa | 29-Sep-20 | <a href="https://cchealth.org/press-releases/2020/0929-More-Businesses-and-Services-Can-Reopen.php">https://cchealth.org/press-releases/2020/0929-More-Businesses-and-Services-Can-Reopen.php</a>                                                                                                                                                                                                                                                                                                                                                                                     |
| Contra Costa | 9-Oct-20  | <a href="https://wp.sbcounty.gov/cao/countywire/?p=9160#:~:text=Private%20outdoor%20gatherings%20of%20three%20households%20now%20allowed%20throughout%20the%20county%2C%20state,-Published%20October%209&amp;text=Private%20outdoor%20gatherings%20of%20people,Gavin%20Newsom%20on%20Friday.">https://wp.sbcounty.gov/cao/countywire/?p=9160#:~:text=Private%20outdoor%20gatherings%20of%20three%20households%20now%20allowed%20throughout%20the%20county%2C%20state,-Published%20October%209&amp;text=Private%20outdoor%20gatherings%20of%20people,Gavin%20Newsom%20on%20Friday.</a> |
| Contra Costa | 27-Oct-20 | <a href="https://cchealth.org/press-releases/2020/1027-cchs-reopening-plan.php">https://cchealth.org/press-releases/2020/1027-cchs-reopening-plan.php</a>                                                                                                                                                                                                                                                                                                                                                                                                                             |
| Contra Costa | 27-Oct-20 | <a href="https://813dcad3-2b07-4f3f-a25e-23c48c566922.filesusr.com/ugd/84606e_de4d53178bc34d45a6d2ea45921d47d5.pdf">https://813dcad3-2b07-4f3f-a25e-23c48c566922.filesusr.com/ugd/84606e_de4d53178bc34d45a6d2ea45921d47d5.pdf</a>                                                                                                                                                                                                                                                                                                                                                     |
| Contra Costa | 4-Nov-20  | <a href="https://813dcad3-2b07-4f3f-a25e-23c48c566922.filesusr.com/ugd/84606e_00eb93d783bc4bdb8119d8e2e588bf86.pdf">https://813dcad3-2b07-4f3f-a25e-23c48c566922.filesusr.com/ugd/84606e_00eb93d783bc4bdb8119d8e2e588bf86.pdf</a>                                                                                                                                                                                                                                                                                                                                                     |
| Contra Costa | 4-Nov-20  | <a href="https://813dcad3-2b07-4f3f-a25e-23c48c566922.filesusr.com/ugd/84606e_7c1e64c309644a74a13c43d0700bbdbf.pdf">https://813dcad3-2b07-4f3f-a25e-23c48c566922.filesusr.com/ugd/84606e_7c1e64c309644a74a13c43d0700bbdbf.pdf</a>                                                                                                                                                                                                                                                                                                                                                     |
| Contra Costa | 10-Nov-20 | <a href="https://www.latimes.com/california/story/2020-11-10/california-coronavirus-cases-climb-more-counties-expected-strict-reopenings">https://www.latimes.com/california/story/2020-11-10/california-coronavirus-cases-climb-more-counties-expected-strict-reopenings</a>                                                                                                                                                                                                                                                                                                         |
| Contra Costa | 13-Nov-20 | <a href="https://813dcad3-2b07-4f3f-a25e-23c48c566922.filesusr.com/ugd/84606e_afeb94f392104729a35c514998fc35d9.pdf">https://813dcad3-2b07-4f3f-a25e-23c48c566922.filesusr.com/ugd/84606e_afeb94f392104729a35c514998fc35d9.pdf</a>                                                                                                                                                                                                                                                                                                                                                     |
| Contra Costa | 17-Nov-20 | <a href="https://kmph.com/news/local/40-california-counties-in-purple-tier-including-the-central-valley">https://kmph.com/news/local/40-california-counties-in-purple-tier-including-the-central-valley</a>                                                                                                                                                                                                                                                                                                                                                                           |
| Contra Costa | 19-Nov-20 | <a href="https://www.cdph.ca.gov/Programs/CID/DCDC/Pages/COVID-19/limited-stay-at-home-order.aspx">https://www.cdph.ca.gov/Programs/CID/DCDC/Pages/COVID-19/limited-stay-at-home-order.aspx</a>                                                                                                                                                                                                                                                                                                                                                                                       |
| Contra Costa | 4-Dec-20  | <a href="https://813dcad3-2b07-4f3f-a25e-23c48c566922.filesusr.com/ugd/84606e_4ec88b181449404e8dcb7e63e48ed483.pdf">https://813dcad3-2b07-4f3f-a25e-23c48c566922.filesusr.com/ugd/84606e_4ec88b181449404e8dcb7e63e48ed483.pdf</a>                                                                                                                                                                                                                                                                                                                                                     |
| Contra Costa | 16-Dec-20 | <a href="https://www.gov.ca.gov/wp-content/uploads/2020/12/12.3.20-Stay-at-Home-Order-ICU-Scenario.pdf">https://www.gov.ca.gov/wp-content/uploads/2020/12/12.3.20-Stay-at-Home-Order-ICU-Scenario.pdf</a>                                                                                                                                                                                                                                                                                                                                                                             |
| Contra Costa | 16-Dec-20 | <a href="https://813dcad3-2b07-4f3f-a25e-23c48c566922.filesusr.com/ugd/84606e_b1c3d2c28e71408b915dcdefaedca78.pdf">https://813dcad3-2b07-4f3f-a25e-23c48c566922.filesusr.com/ugd/84606e_b1c3d2c28e71408b915dcdefaedca78.pdf</a>                                                                                                                                                                                                                                                                                                                                                       |
| Del Norte    | 9-Mar-20  | <a href="https://docs.google.com/a/co.del-norte.ca.us/viewer?a=v&amp;pid=sites&amp;srcid=Y28uZGVsLW5vcnRlMmNhLnVzZGRuY298Z3g6NDY1NDA0NDg0NDNmYjdmNA">https://docs.google.com/a/co.del-norte.ca.us/viewer?a=v&amp;pid=sites&amp;srcid=Y28uZGVsLW5vcnRlMmNhLnVzZGRuY298Z3g6NDY1NDA0NDg0NDNmYjdmNA</a>                                                                                                                                                                                                                                                                                   |
| Del Norte    | 12-Mar-20 | <a href="https://docs.google.com/a/co.del-norte.ca.us/viewer?a=v&amp;pid=sites&amp;srcid=Y28uZGVsLW5vcnRlMmNhLnVzZGRuY298Z3g6NDEyYjZjZjgY2Zk">https://docs.google.com/a/co.del-norte.ca.us/viewer?a=v&amp;pid=sites&amp;srcid=Y28uZGVsLW5vcnRlMmNhLnVzZGRuY298Z3g6NDEyYjZjZjgY2Zk</a>                                                                                                                                                                                                                                                                                                 |
| Del Norte    | 16-Mar-20 | <a href="https://www.dnurd.org/site/default.aspx?PageType=3&amp;DomainID=4&amp;ModuleInstanceID=1599&amp;ViewID=6446EE88-D30C-497E-9316-3F8874B3E108&amp;RenderLoc=0&amp;FlexDataID=2458&amp;PageID=1">https://www.dnurd.org/site/default.aspx?PageType=3&amp;DomainID=4&amp;ModuleInstanceID=1599&amp;ViewID=6446EE88-D30C-497E-9316-3F8874B3E108&amp;RenderLoc=0&amp;FlexDataID=2458&amp;PageID=1</a>                                                                                                                                                                               |
| Del Norte    | 16-Mar-20 | <a href="https://docs.google.com/a/co.del-norte.ca.us/viewer?a=v&amp;pid=sites&amp;srcid=Y28uZGVsLW5vcnRlMmNhLnVzZGRuY298Z3g6MmNiMmZjMGMwNDFlNTczMw">https://docs.google.com/a/co.del-norte.ca.us/viewer?a=v&amp;pid=sites&amp;srcid=Y28uZGVsLW5vcnRlMmNhLnVzZGRuY298Z3g6MmNiMmZjMGMwNDFlNTczMw</a>                                                                                                                                                                                                                                                                                   |
| Del Norte    | 17-Mar-20 | <a href="https://docs.google.com/a/co.del-norte.ca.us/viewer?a=v&amp;pid=sites&amp;srcid=Y28uZGVsLW5vcnRlMmNhLnVzZGRuY298Z3g6NmNINDQyMTI4N2Y3YjU4Nw">https://docs.google.com/a/co.del-norte.ca.us/viewer?a=v&amp;pid=sites&amp;srcid=Y28uZGVsLW5vcnRlMmNhLnVzZGRuY298Z3g6NmNINDQyMTI4N2Y3YjU4Nw</a>                                                                                                                                                                                                                                                                                   |
| Del Norte    | 19-Mar-20 | <a href="https://www.gov.ca.gov/wp-content/uploads/2020/03/3.19.20-attested-EO-N-33-20-COVID-19-HEALTH-ORDER.pdf">https://www.gov.ca.gov/wp-content/uploads/2020/03/3.19.20-attested-EO-N-33-20-COVID-19-HEALTH-ORDER.pdf</a>                                                                                                                                                                                                                                                                                                                                                         |
| Del Norte    | 27-Mar-20 | <a href="https://docs.google.com/a/co.del-norte.ca.us/viewer?a=v&amp;pid=sites&amp;srcid=Y28uZGVsLW5vcnRlMmNhLnVzZGRuY298Z3g6MmZiY2VmNGVknWlwZDM1OA">https://docs.google.com/a/co.del-norte.ca.us/viewer?a=v&amp;pid=sites&amp;srcid=Y28uZGVsLW5vcnRlMmNhLnVzZGRuY298Z3g6MmZiY2VmNGVknWlwZDM1OA</a>                                                                                                                                                                                                                                                                                   |
| Del Norte    | 2-Apr-20  | <a href="https://docs.google.com/a/co.del-norte.ca.us/viewer?a=v&amp;pid=sites&amp;srcid=Y28uZGVsLW5vcnRlMmNhLnVzZGRuY298Z3g6NzhhMWU4MzYyMjY2Vh">https://docs.google.com/a/co.del-norte.ca.us/viewer?a=v&amp;pid=sites&amp;srcid=Y28uZGVsLW5vcnRlMmNhLnVzZGRuY298Z3g6NzhhMWU4MzYyMjY2Vh</a>                                                                                                                                                                                                                                                                                           |
| Del Norte    | 27-Apr-20 | <a href="https://docs.google.com/a/co.del-norte.ca.us/viewer?a=v&amp;pid=sites&amp;srcid=Y28uZGVsLW5vcnRlMmNhLnVzZGRuY298Z3g6NGM1OGM4NjgzZjJmYzA1OA">https://docs.google.com/a/co.del-norte.ca.us/viewer?a=v&amp;pid=sites&amp;srcid=Y28uZGVsLW5vcnRlMmNhLnVzZGRuY298Z3g6NGM1OGM4NjgzZjJmYzA1OA</a>                                                                                                                                                                                                                                                                                   |
| Del Norte    | 8-May-20  | <a href="https://www.latimes.com/california/story/2020-05-08/these-are-the-california-businesses-that-can-reopen-and-these-are-the-rules">https://www.latimes.com/california/story/2020-05-08/these-are-the-california-businesses-that-can-reopen-and-these-are-the-rules</a>                                                                                                                                                                                                                                                                                                         |
| Del Norte    | 15-May-20 | <a href="https://docs.google.com/a/co.del-norte.ca.us/viewer?a=v&amp;pid=sites&amp;srcid=Y28uZGVsLW5vcnRlMmNhLnVzZGRuY298Z3g6N2MyMWM3YzYzTU2Y2Y2g">https://docs.google.com/a/co.del-norte.ca.us/viewer?a=v&amp;pid=sites&amp;srcid=Y28uZGVsLW5vcnRlMmNhLnVzZGRuY298Z3g6N2MyMWM3YzYzTU2Y2Y2g</a>                                                                                                                                                                                                                                                                                       |
| Del Norte    | 26-May-20 | <a href="https://docs.google.com/a/co.del-norte.ca.us/viewer?a=v&amp;pid=sites&amp;srcid=Y28uZGVsLW5vcnRlMmNhLnVzZGRuY298Z3g6NTA0YmE0NDg4Y2U3NTk4Yw">https://docs.google.com/a/co.del-norte.ca.us/viewer?a=v&amp;pid=sites&amp;srcid=Y28uZGVsLW5vcnRlMmNhLnVzZGRuY298Z3g6NTA0YmE0NDg4Y2U3NTk4Yw</a>                                                                                                                                                                                                                                                                                   |
| Del Norte    | 3-Jun-20  | <a href="https://docs.google.com/a/co.del-norte.ca.us/viewer?a=v&amp;pid=sites&amp;srcid=Y28uZGVsLW5vcnRlMmNhLnVzZGRuY298Z3g6NDA5ZmNhYTEzNzRhNDY2Mw">https://docs.google.com/a/co.del-norte.ca.us/viewer?a=v&amp;pid=sites&amp;srcid=Y28uZGVsLW5vcnRlMmNhLnVzZGRuY298Z3g6NDA5ZmNhYTEzNzRhNDY2Mw</a>                                                                                                                                                                                                                                                                                   |

|           |           |                                                                                                                                                                                                                                                                                                                                                                                                                                                                                                                                                                                       |
|-----------|-----------|---------------------------------------------------------------------------------------------------------------------------------------------------------------------------------------------------------------------------------------------------------------------------------------------------------------------------------------------------------------------------------------------------------------------------------------------------------------------------------------------------------------------------------------------------------------------------------------|
| Del Norte | 12-Jun-20 | <a href="https://docs.google.com/a/co.del-norte.ca.us/viewer?a=v&amp;pid=sites&amp;srcid=Y28uZGVsLW5vcnRlMmNhLnVzfGRuY298Z3g6NjQzZmlxODA2NDYyZGI0Yg">https://docs.google.com/a/co.del-norte.ca.us/viewer?a=v&amp;pid=sites&amp;srcid=Y28uZGVsLW5vcnRlMmNhLnVzfGRuY298Z3g6NjQzZmlxODA2NDYyZGI0Yg</a>                                                                                                                                                                                                                                                                                   |
| Del Norte | 15-Jun-20 | <a href="https://docs.google.com/a/co.del-norte.ca.us/viewer?a=v&amp;pid=sites&amp;srcid=Y28uZGVsLW5vcnRlMmNhLnVzfGRuY298Z3g6MjBiN2I1NzcyMWQ4NTMwMw">https://docs.google.com/a/co.del-norte.ca.us/viewer?a=v&amp;pid=sites&amp;srcid=Y28uZGVsLW5vcnRlMmNhLnVzfGRuY298Z3g6MjBiN2I1NzcyMWQ4NTMwMw</a>                                                                                                                                                                                                                                                                                   |
| Del Norte | 18-Jun-20 | <a href="https://www.cdph.ca.gov/Programs/CID/DCDC/CDPH%20Document%20Library/COVID-19/Guidance-for-Face-Coverings_06-18-2020.pdf">https://www.cdph.ca.gov/Programs/CID/DCDC/CDPH%20Document%20Library/COVID-19/Guidance-for-Face-Coverings_06-18-2020.pdf</a>                                                                                                                                                                                                                                                                                                                         |
| Del Norte | 26-Jun-20 | <a href="https://drive.google.com/file/d/1T3AmmO6UqlvL2W5JvTCEPXLV0C6ua9X8/view">https://drive.google.com/file/d/1T3AmmO6UqlvL2W5JvTCEPXLV0C6ua9X8/view</a>                                                                                                                                                                                                                                                                                                                                                                                                                           |
| Del Norte | 29-Jun-20 | <a href="https://drive.google.com/file/d/1na9J-bWo2iuhCNmTXSQIGK0VC7jEDd2h/view">https://drive.google.com/file/d/1na9J-bWo2iuhCNmTXSQIGK0VC7jEDd2h/view</a>                                                                                                                                                                                                                                                                                                                                                                                                                           |
| Del Norte | 1-Jul-20  | <a href="https://drive.google.com/file/d/1na9J-bWo2iuhCNmTXSQIGK0VC7jEDd2h/view">https://drive.google.com/file/d/1na9J-bWo2iuhCNmTXSQIGK0VC7jEDd2h/view</a>                                                                                                                                                                                                                                                                                                                                                                                                                           |
| Del Norte | 10-Jul-20 | <a href="https://drive.google.com/file/d/1VuJhm3UwWTSQZYBpR1sfGPYioSPZBpKm/view">https://drive.google.com/file/d/1VuJhm3UwWTSQZYBpR1sfGPYioSPZBpKm/view</a>                                                                                                                                                                                                                                                                                                                                                                                                                           |
| Del Norte | 13-Jul-20 | <a href="https://www.latimes.com/california/story/2020-07-13/newsom-california-county-rollback-reopening-coronavirus">https://www.latimes.com/california/story/2020-07-13/newsom-california-county-rollback-reopening-coronavirus</a>                                                                                                                                                                                                                                                                                                                                                 |
| Del Norte | 20-Jul-20 | <a href="https://drive.google.com/file/d/1h8YdHqGF53nvZyLRMV5JEMQhhtJG6giU/view">https://drive.google.com/file/d/1h8YdHqGF53nvZyLRMV5JEMQhhtJG6giU/view</a>                                                                                                                                                                                                                                                                                                                                                                                                                           |
| Del Norte | 28-Aug-20 | <a href="https://projects.sfchronicle.com/2020/coronavirus-map/california-reopening/">https://projects.sfchronicle.com/2020/coronavirus-map/california-reopening/</a>                                                                                                                                                                                                                                                                                                                                                                                                                 |
| Del Norte | 9-Oct-20  | <a href="https://wp.sbcounty.gov/cao/countywire/?p=9160#:~:text=Private%20outdoor%20gatherings%20of%20three%20households%20now%20allowed%20throughout%20the%20county%2C%20state,-Published%20October%209&amp;text=Private%20outdoor%20gatherings%20of%20people,Gavin%20Newsom%20on%20Friday.">https://wp.sbcounty.gov/cao/countywire/?p=9160#:~:text=Private%20outdoor%20gatherings%20of%20three%20households%20now%20allowed%20throughout%20the%20county%2C%20state,-Published%20October%209&amp;text=Private%20outdoor%20gatherings%20of%20people,Gavin%20Newsom%20on%20Friday.</a> |
| Del Norte | 13-Nov-20 | <a href="https://www.cdph.ca.gov/Programs/CID/DCDC/Pages/COVID-19/Guidance-for-the-Prevention-of-COVID-19-Transmission-for-Gatherings-November-2020.aspx">https://www.cdph.ca.gov/Programs/CID/DCDC/Pages/COVID-19/Guidance-for-the-Prevention-of-COVID-19-Transmission-for-Gatherings-November-2020.aspx</a>                                                                                                                                                                                                                                                                         |
| Del Norte | 16-Nov-20 | <a href="https://www.cdph.ca.gov/Programs/CID/DCDC/Pages/COVID-19/guidance-for-face-coverings.aspx">https://www.cdph.ca.gov/Programs/CID/DCDC/Pages/COVID-19/guidance-for-face-coverings.aspx</a>                                                                                                                                                                                                                                                                                                                                                                                     |
| Del Norte | 17-Nov-20 | <a href="https://kmp.com/news/local/40-california-counties-in-purple-tier-including-the-central-valley">https://kmp.com/news/local/40-california-counties-in-purple-tier-including-the-central-valley</a>                                                                                                                                                                                                                                                                                                                                                                             |
| Del Norte | 24-Nov-20 | <a href="https://www.kcra.com/article/california-covid-tiers-update-nov-24/34774234">https://www.kcra.com/article/california-covid-tiers-update-nov-24/34774234</a>                                                                                                                                                                                                                                                                                                                                                                                                                   |
| El Dorado | 12-Mar-20 | <a href="https://www.edcgov.us/Government/hhsa/Documents/COVID-19%20Public%20Health%20Emergency%20Declaration.pdf">https://www.edcgov.us/Government/hhsa/Documents/COVID-19%20Public%20Health%20Emergency%20Declaration.pdf</a>                                                                                                                                                                                                                                                                                                                                                       |
| El Dorado | 19-Mar-20 | <a href="https://edcgov.us/Government/hhsa/Documents/EI%20Dorado%20-%20shelter-in-place%20directive%203-19-2020.pdf">https://edcgov.us/Government/hhsa/Documents/EI%20Dorado%20-%20shelter-in-place%20directive%203-19-2020.pdf</a>                                                                                                                                                                                                                                                                                                                                                   |
| El Dorado | 19-Mar-20 | <a href="https://www.gov.ca.gov/wp-content/uploads/2020/03/3.19.20-attested-EO-N-33-20-COVID-19-HEALTH-ORDER.pdf">https://www.gov.ca.gov/wp-content/uploads/2020/03/3.19.20-attested-EO-N-33-20-COVID-19-HEALTH-ORDER.pdf</a>                                                                                                                                                                                                                                                                                                                                                         |
| El Dorado | 24-Mar-20 | <a href="https://edcgov.us/Government/hhsa/Documents/COVID-19%20Short%20Term%20Rental%20Directive.pdf">https://edcgov.us/Government/hhsa/Documents/COVID-19%20Short%20Term%20Rental%20Directive.pdf</a>                                                                                                                                                                                                                                                                                                                                                                               |
| El Dorado | 31-Mar-20 | <a href="https://edcgov.us/Government/hhsa/Documents/COVID19%20Directive%20extended%20to%204-30-20.pdf">https://edcgov.us/Government/hhsa/Documents/COVID19%20Directive%20extended%20to%204-30-20.pdf</a>                                                                                                                                                                                                                                                                                                                                                                             |
| El Dorado | 3-Apr-20  | <a href="https://edcgov.us/Government/hhsa/PublishingImages/pages/EDCCOVID-19-Orders-Directives/COVID19%20Tahoe%20Travel%20Order.pdf">https://edcgov.us/Government/hhsa/PublishingImages/pages/EDCCOVID-19-Orders-Directives/COVID19%20Tahoe%20Travel%20Order.pdf</a>                                                                                                                                                                                                                                                                                                                 |
| El Dorado | 29-Apr-20 | <a href="https://www.edcgov.us/County%20Press%20Releases/Documents/EXTENSION-Nonessential-Travel-SLT.pdf">https://www.edcgov.us/County%20Press%20Releases/Documents/EXTENSION-Nonessential-Travel-SLT.pdf</a>                                                                                                                                                                                                                                                                                                                                                                         |
| El Dorado | 9-May-20  | <a href="https://www.edcgov.us/County%20Press%20Releases/Pages/Public-Health-Officer-Says-County-Meets-Criteria-to-Fully-Open-Stage-2-Businesses%2c-Facilities.aspx">https://www.edcgov.us/County%20Press%20Releases/Pages/Public-Health-Officer-Says-County-Meets-Criteria-to-Fully-Open-Stage-2-Businesses%2c-Facilities.aspx</a>                                                                                                                                                                                                                                                   |
| El Dorado | 12-May-20 | <a href="https://www.edcgov.us/County%20Press%20Releases/Pages/El-Dorado-County-Gets-Variance-from-State.aspx">https://www.edcgov.us/County%20Press%20Releases/Pages/El-Dorado-County-Gets-Variance-from-State.aspx</a>                                                                                                                                                                                                                                                                                                                                                               |
| El Dorado | 26-May-20 | <a href="https://www.edcgov.us/Government/hhsa/PublishingImages/pages/EDCCOVID-19-News/Barbershop%20and%20Hair%20Salons%20Allowed%20to%20Reopen.pdf">https://www.edcgov.us/Government/hhsa/PublishingImages/pages/EDCCOVID-19-News/Barbershop%20and%20Hair%20Salons%20Allowed%20to%20Reopen.pdf</a>                                                                                                                                                                                                                                                                                   |
| El Dorado | 27-May-20 | <a href="https://www.edcgov.us/Government/hhsa/Documents/Local%20Order%20re%20Lake%20Tahoe%20ban%20rescission.pdf">https://www.edcgov.us/Government/hhsa/Documents/Local%20Order%20re%20Lake%20Tahoe%20ban%20rescission.pdf</a>                                                                                                                                                                                                                                                                                                                                                       |
| El Dorado | 5-Jun-20  | <a href="https://www.edcgov.us/Government/hhsa/PublishingImages/pages/EDCCOVID-19-News/PR%202020-40%20Williams%20Statement%20on%2012%20new%20guidelines.pdf">https://www.edcgov.us/Government/hhsa/PublishingImages/pages/EDCCOVID-19-News/PR%202020-40%20Williams%20Statement%20on%2012%20new%20guidelines.pdf</a>                                                                                                                                                                                                                                                                   |
| El Dorado | 18-Jun-20 | <a href="https://www.cdph.ca.gov/Programs/CID/DCDC/CDPH%20Document%20Library/COVID-19/Guidance-for-Face-Coverings_06-18-2020.pdf">https://www.cdph.ca.gov/Programs/CID/DCDC/CDPH%20Document%20Library/COVID-19/Guidance-for-Face-Coverings_06-18-2020.pdf</a>                                                                                                                                                                                                                                                                                                                         |

|           |           |                                                                                                                                                                                                                                                                                                                                                                                                                                                                                                                                                                                       |
|-----------|-----------|---------------------------------------------------------------------------------------------------------------------------------------------------------------------------------------------------------------------------------------------------------------------------------------------------------------------------------------------------------------------------------------------------------------------------------------------------------------------------------------------------------------------------------------------------------------------------------------|
| El Dorado | 19-Jun-20 | <a href="https://www.tahoeledgertribune.com/news/el-dorado-moving-to-stage-3-once-state-guidelines-released/">https://www.tahoeledgertribune.com/news/el-dorado-moving-to-stage-3-once-state-guidelines-released/</a>                                                                                                                                                                                                                                                                                                                                                                 |
| El Dorado | 3-Jul-20  | <a href="https://www.edcgov.us/Government/hhsa/PublishingImages/pages/EDCCCOVID-19-News/PR%202020-42%20Independence%20Day%20Statement.pdf">https://www.edcgov.us/Government/hhsa/PublishingImages/pages/EDCCCOVID-19-News/PR%202020-42%20Independence%20Day%20Statement.pdf</a>                                                                                                                                                                                                                                                                                                       |
| El Dorado | 13-Jul-20 | <a href="https://www.latimes.com/california/story/2020-07-13/newsom-california-county-rollback-reopening-coronavirus">https://www.latimes.com/california/story/2020-07-13/newsom-california-county-rollback-reopening-coronavirus</a>                                                                                                                                                                                                                                                                                                                                                 |
| El Dorado | 28-Aug-20 | <a href="https://projects.sfchronicle.com/2020/coronavirus-map/california-reopening/">https://projects.sfchronicle.com/2020/coronavirus-map/california-reopening/</a>                                                                                                                                                                                                                                                                                                                                                                                                                 |
| El Dorado | 22-Sep-20 | <a href="https://projects.sfchronicle.com/2020/coronavirus-map/california-reopening/">https://projects.sfchronicle.com/2020/coronavirus-map/california-reopening/</a>                                                                                                                                                                                                                                                                                                                                                                                                                 |
| El Dorado | 9-Oct-20  | <a href="https://wp.sbcounty.gov/cao/countywire/?p=9160#:~:text=Private%20outdoor%20gatherings%20of%20three%20households%20now%20allowed%20throughout%20the%20county%2C%20state,-Published%20October%209&amp;text=Private%20outdoor%20gatherings%20of%20people,Gavin%20Newsom%20on%20Friday.">https://wp.sbcounty.gov/cao/countywire/?p=9160#:~:text=Private%20outdoor%20gatherings%20of%20three%20households%20now%20allowed%20throughout%20the%20county%2C%20state,-Published%20October%209&amp;text=Private%20outdoor%20gatherings%20of%20people,Gavin%20Newsom%20on%20Friday.</a> |
| El Dorado | 10-Nov-20 | <a href="https://www.latimes.com/california/story/2020-11-10/california-coronavirus-cases-climb-more-counties-expected-strict-reopenings">https://www.latimes.com/california/story/2020-11-10/california-coronavirus-cases-climb-more-counties-expected-strict-reopenings</a>                                                                                                                                                                                                                                                                                                         |
| El Dorado | 13-Nov-20 | <a href="https://www.cdph.ca.gov/Programs/CID/DCDC/Pages/COVID-19/Guidance-for-the-Prevention-of-COVID-19-Transmission-for-Gatherings-November-2020.aspx">https://www.cdph.ca.gov/Programs/CID/DCDC/Pages/COVID-19/Guidance-for-the-Prevention-of-COVID-19-Transmission-for-Gatherings-November-2020.aspx</a>                                                                                                                                                                                                                                                                         |
| El Dorado | 16-Nov-20 | <a href="https://www.cdph.ca.gov/Programs/CID/DCDC/Pages/COVID-19/guidance-for-face-coverings.aspx">https://www.cdph.ca.gov/Programs/CID/DCDC/Pages/COVID-19/guidance-for-face-coverings.aspx</a>                                                                                                                                                                                                                                                                                                                                                                                     |
| El Dorado | 17-Nov-20 | <a href="https://kmp.com/news/local/40-california-counties-in-purple-tier-including-the-central-valley">https://kmp.com/news/local/40-california-counties-in-purple-tier-including-the-central-valley</a>                                                                                                                                                                                                                                                                                                                                                                             |
| El Dorado | 19-Nov-20 | <a href="https://www.cdph.ca.gov/Programs/CID/DCDC/Pages/COVID-19/limited-stay-at-home-order.aspx">https://www.cdph.ca.gov/Programs/CID/DCDC/Pages/COVID-19/limited-stay-at-home-order.aspx</a>                                                                                                                                                                                                                                                                                                                                                                                       |
| El Dorado | 9-Dec-20  | <a href="https://www.gov.ca.gov/wp-content/uploads/2020/12/12.3.20-Stay-at-Home-Order-ICU-Scenario.pdf">https://www.gov.ca.gov/wp-content/uploads/2020/12/12.3.20-Stay-at-Home-Order-ICU-Scenario.pdf</a>                                                                                                                                                                                                                                                                                                                                                                             |
| Fresno    | 15-Mar-20 | <a href="https://www.fresnobee.com/news/coronavirus/article241210506.html">https://www.fresnobee.com/news/coronavirus/article241210506.html</a>                                                                                                                                                                                                                                                                                                                                                                                                                                       |
| Fresno    | 19-Mar-20 | <a href="https://www.gov.ca.gov/wp-content/uploads/2020/03/3.19.20-attested-EO-N-33-20-COVID-19-HEALTH-ORDER.pdf">https://www.gov.ca.gov/wp-content/uploads/2020/03/3.19.20-attested-EO-N-33-20-COVID-19-HEALTH-ORDER.pdf</a>                                                                                                                                                                                                                                                                                                                                                         |
| Fresno    | 3-Apr-20  | <a href="https://www.co.fresno.ca.us/Home/ShowDocument?id=43176">https://www.co.fresno.ca.us/Home/ShowDocument?id=43176</a>                                                                                                                                                                                                                                                                                                                                                                                                                                                           |
| Fresno    | 1-May-20  | <a href="https://www.fresno.gov/wp-content/uploads/2020/05/Emergency-Order-2020-16-Shelter-in-Place-Modified-and-Extended-with-Modified-Appendix-A.pdf">https://www.fresno.gov/wp-content/uploads/2020/05/Emergency-Order-2020-16-Shelter-in-Place-Modified-and-Extended-with-Modified-Appendix-A.pdf</a>                                                                                                                                                                                                                                                                             |
| Fresno    | 11-May-20 | <a href="https://www.co.fresno.ca.us/Home/Components/News/News/581/15">https://www.co.fresno.ca.us/Home/Components/News/News/581/15</a>                                                                                                                                                                                                                                                                                                                                                                                                                                               |
| Fresno    | 18-May-20 | <a href="https://www.fresnobee.com/news/local/article242818696.html">https://www.fresnobee.com/news/local/article242818696.html</a>                                                                                                                                                                                                                                                                                                                                                                                                                                                   |
| Fresno    | 20-May-20 | <a href="https://www.co.fresno.ca.us/home/showdocument?id=44811">https://www.co.fresno.ca.us/home/showdocument?id=44811</a>                                                                                                                                                                                                                                                                                                                                                                                                                                                           |
| Fresno    | 26-May-20 | <a href="https://www.co.fresno.ca.us/Home/Components/News/News/589/15">https://www.co.fresno.ca.us/Home/Components/News/News/589/15</a>                                                                                                                                                                                                                                                                                                                                                                                                                                               |
| Fresno    | 12-Jun-20 | <a href="https://www.fresnobee.com/living/food-drink/bethany-clough/article243474526.html">https://www.fresnobee.com/living/food-drink/bethany-clough/article243474526.html</a>                                                                                                                                                                                                                                                                                                                                                                                                       |
| Fresno    | 18-Jun-20 | <a href="https://www.cdph.ca.gov/Programs/CID/DCDC/CDPH%20Document%20Library/COVID-19/Guidance-for-Face-Coverings_06-18-2020.pdf">https://www.cdph.ca.gov/Programs/CID/DCDC/CDPH%20Document%20Library/COVID-19/Guidance-for-Face-Coverings_06-18-2020.pdf</a>                                                                                                                                                                                                                                                                                                                         |
| Fresno    | 26-Jun-20 | <a href="https://www.fresnobee.com/living/food-drink/bethany-clough/article243474526.html">https://www.fresnobee.com/living/food-drink/bethany-clough/article243474526.html</a>                                                                                                                                                                                                                                                                                                                                                                                                       |
| Fresno    | 28-Jun-20 | <a href="https://www.co.fresno.ca.us/home/showdocument?id=46634">https://www.co.fresno.ca.us/home/showdocument?id=46634</a>                                                                                                                                                                                                                                                                                                                                                                                                                                                           |
| Fresno    | 1-Jul-20  | <a href="https://www.fresnobee.com/news/coronavirus/article243923677.html">https://www.fresnobee.com/news/coronavirus/article243923677.html</a>                                                                                                                                                                                                                                                                                                                                                                                                                                       |
| Fresno    | 13-Jul-20 | <a href="https://www.latimes.com/california/story/2020-07-13/newsom-california-county-rollback-reopening-coronavirus">https://www.latimes.com/california/story/2020-07-13/newsom-california-county-rollback-reopening-coronavirus</a>                                                                                                                                                                                                                                                                                                                                                 |
| Fresno    | 13-Jul-20 | <a href="https://www.fresnobee.com/article244194597.html">https://www.fresnobee.com/article244194597.html</a>                                                                                                                                                                                                                                                                                                                                                                                                                                                                         |
| Fresno    | 17-Jul-20 | <a href="https://www.cdph.ca.gov/Programs/CID/DCDC/CDPH%20Document%20Library/COVID-19/Schools%20Reopening%20Recommendations.pdf">https://www.cdph.ca.gov/Programs/CID/DCDC/CDPH%20Document%20Library/COVID-19/Schools%20Reopening%20Recommendations.pdf</a>                                                                                                                                                                                                                                                                                                                           |

|        |           |                                                                                                                                                                                                                                                                                                                                                                                                                                                                                                                                                                                       |
|--------|-----------|---------------------------------------------------------------------------------------------------------------------------------------------------------------------------------------------------------------------------------------------------------------------------------------------------------------------------------------------------------------------------------------------------------------------------------------------------------------------------------------------------------------------------------------------------------------------------------------|
| Fresno | 23-Jul-20 | <a href="https://www.co.fresno.ca.us/Home/ShowDocument?id=47217">https://www.co.fresno.ca.us/Home/ShowDocument?id=47217</a>                                                                                                                                                                                                                                                                                                                                                                                                                                                           |
| Fresno | 28-Aug-20 | <a href="https://abc7news.com/ca-reopneing-phases-covid19cagov-gavin-newsom-update-california-salon-reopening/6393805/">https://abc7news.com/ca-reopneing-phases-covid19cagov-gavin-newsom-update-california-salon-reopening/6393805/</a>                                                                                                                                                                                                                                                                                                                                             |
| Fresno | 22-Sep-20 | <a href="https://files.covid19.ca.gov/pdf/guidance-expanded-personal-care-services--en.pdf">https://files.covid19.ca.gov/pdf/guidance-expanded-personal-care-services--en.pdf</a>                                                                                                                                                                                                                                                                                                                                                                                                     |
| Fresno | 29-Sep-20 | <a href="https://www.fresnobee.com/news/coronavirus/article246090475.html">https://www.fresnobee.com/news/coronavirus/article246090475.html</a>                                                                                                                                                                                                                                                                                                                                                                                                                                       |
| Fresno | 9-Oct-20  | <a href="https://wp.sbcounty.gov/cao/countywire/?p=9160#:~:text=Private%20outdoor%20gatherings%20of%20three%20households%20now%20allowed%20throughout%20the%20county%2C%20state,-Published%20October%209&amp;text=Private%20outdoor%20gatherings%20of%20people,Gavin%20Newsom%20on%20Friday.">https://wp.sbcounty.gov/cao/countywire/?p=9160#:~:text=Private%20outdoor%20gatherings%20of%20three%20households%20now%20allowed%20throughout%20the%20county%2C%20state,-Published%20October%209&amp;text=Private%20outdoor%20gatherings%20of%20people,Gavin%20Newsom%20on%20Friday.</a> |
| Fresno | 13-Nov-20 | <a href="https://www.cdph.ca.gov/Programs/CID/DCDC/Pages/COVID-19/Guidance-for-the-Prevention-of-COVID-19-Transmission-for-Gatherings-November-2020.aspx">https://www.cdph.ca.gov/Programs/CID/DCDC/Pages/COVID-19/Guidance-for-the-Prevention-of-COVID-19-Transmission-for-Gatherings-November-2020.aspx</a>                                                                                                                                                                                                                                                                         |
| Fresno | 16-Nov-20 | <a href="https://www.cdph.ca.gov/Programs/CID/DCDC/Pages/COVID-19/guidance-for-face-coverings.aspx">https://www.cdph.ca.gov/Programs/CID/DCDC/Pages/COVID-19/guidance-for-face-coverings.aspx</a>                                                                                                                                                                                                                                                                                                                                                                                     |
| Fresno | 17-Nov-20 | <a href="https://kmph.com/news/local/40-california-counties-in-purple-tier-including-the-central-valley">https://kmph.com/news/local/40-california-counties-in-purple-tier-including-the-central-valley</a>                                                                                                                                                                                                                                                                                                                                                                           |
| Fresno | 19-Nov-20 | <a href="https://www.cdph.ca.gov/Programs/CID/DCDC/Pages/COVID-19/limited-stay-at-home-order.aspx">https://www.cdph.ca.gov/Programs/CID/DCDC/Pages/COVID-19/limited-stay-at-home-order.aspx</a>                                                                                                                                                                                                                                                                                                                                                                                       |
| Fresno | 5-Dec-20  | <a href="https://www.gov.ca.gov/wp-content/uploads/2020/12/12.3.20-Stay-at-Home-Order-ICU-Scenario.pdf">https://www.gov.ca.gov/wp-content/uploads/2020/12/12.3.20-Stay-at-Home-Order-ICU-Scenario.pdf</a>                                                                                                                                                                                                                                                                                                                                                                             |
| Glenn  | 16-Mar-20 | <a href="https://www.countyofglenn.net/news/emergency-preparedness-press-release-public-health-public-information-public-notice-public-0">https://www.countyofglenn.net/news/emergency-preparedness-press-release-public-health-public-information-public-notice-public-0</a>                                                                                                                                                                                                                                                                                                         |
| Glenn  | 16-Mar-20 | <a href="https://www.countyofglenn.net/news/emergency-preparedness-press-release-public-health-public-information-public-notice-public-0">https://www.countyofglenn.net/news/emergency-preparedness-press-release-public-health-public-information-public-notice-public-0</a>                                                                                                                                                                                                                                                                                                         |
| Glenn  | 18-Mar-20 | <a href="https://www.countyofglenn.net/news/emergency-preparedness-press-release-public-health-public-information-public-notice-public-1">https://www.countyofglenn.net/news/emergency-preparedness-press-release-public-health-public-information-public-notice-public-1</a>                                                                                                                                                                                                                                                                                                         |
| Glenn  | 19-Mar-20 | <a href="https://www.gov.ca.gov/wp-content/uploads/2020/03/3.19.20-attested-EO-N-33-20-COVID-19-HEALTH-ORDER.pdf">https://www.gov.ca.gov/wp-content/uploads/2020/03/3.19.20-attested-EO-N-33-20-COVID-19-HEALTH-ORDER.pdf</a>                                                                                                                                                                                                                                                                                                                                                         |
| Glenn  | 20-Mar-20 | <a href="https://www.countyofglenn.net/news/emergency-preparedness-press-release-public-health-public-information-public-notice-public-2">https://www.countyofglenn.net/news/emergency-preparedness-press-release-public-health-public-information-public-notice-public-2</a>                                                                                                                                                                                                                                                                                                         |
| Glenn  | 8-May-20  | <a href="https://www.countyofglenn.net/sites/default/files/Health_%26_Human_Services/BOS-%20Recovery%20%26%20Reopening%20presentation%205-12-20.pdf">https://www.countyofglenn.net/sites/default/files/Health_%26_Human_Services/BOS-%20Recovery%20%26%20Reopening%20presentation%205-12-20.pdf</a>                                                                                                                                                                                                                                                                                   |
| Glenn  | 13-May-20 | <a href="https://www.countyofglenn.net/sites/default/files/PR%20Glenn%20reopen%20to%20Phase%202B%205-13-20.pdf">https://www.countyofglenn.net/sites/default/files/PR%20Glenn%20reopen%20to%20Phase%202B%205-13-20.pdf</a>                                                                                                                                                                                                                                                                                                                                                             |
| Glenn  | 3-Jun-20  | <a href="https://www.countyofglenn.net/sites/default/files/Health_%26_Human_Services/images/Glenn%20County%20Recovery%20Plan%206-19-2020%20-%20Update.pdf">https://www.countyofglenn.net/sites/default/files/Health_%26_Human_Services/images/Glenn%20County%20Recovery%20Plan%206-19-2020%20-%20Update.pdf</a>                                                                                                                                                                                                                                                                       |
| Glenn  | 11-Jun-20 | <a href="https://www.countyofglenn.net/sites/default/files/Health_%26_Human_Services/images/Glenn%20County%20Recovery%20Plan%206-19-2020%20-%20Update.pdf">https://www.countyofglenn.net/sites/default/files/Health_%26_Human_Services/images/Glenn%20County%20Recovery%20Plan%206-19-2020%20-%20Update.pdf</a>                                                                                                                                                                                                                                                                       |
| Glenn  | 17-Jun-20 | <a href="https://www.countyofglenn.net/sites/default/files/Health_%26_Human_Services/images/Glenn%20County%20Recovery%20Plan%206-19-2020%20-%20Update.pdf">https://www.countyofglenn.net/sites/default/files/Health_%26_Human_Services/images/Glenn%20County%20Recovery%20Plan%206-19-2020%20-%20Update.pdf</a>                                                                                                                                                                                                                                                                       |
| Glenn  | 18-Jun-20 | <a href="https://www.cdph.ca.gov/Programs/CID/DCDC/CDPH%20Document%20Library/COVID-19/Guidance-for-Face-Coverings_06-18-2020.pdf">https://www.cdph.ca.gov/Programs/CID/DCDC/CDPH%20Document%20Library/COVID-19/Guidance-for-Face-Coverings_06-18-2020.pdf</a>                                                                                                                                                                                                                                                                                                                         |
| Glenn  | 30-Jun-20 | <a href="https://www.countyofglenn.net/news/public-health-public-information/20200630/glenn-county-metrics-trigger-watchlist">https://www.countyofglenn.net/news/public-health-public-information/20200630/glenn-county-metrics-trigger-watchlist</a>                                                                                                                                                                                                                                                                                                                                 |
| Glenn  | 1-Jul-20  | <a href="https://www.countyofglenn.net/news/public-health-public-information/20200701/closure-some-business-sectors">https://www.countyofglenn.net/news/public-health-public-information/20200701/closure-some-business-sectors</a>                                                                                                                                                                                                                                                                                                                                                   |
| Glenn  | 13-Jul-20 | <a href="https://www.latimes.com/california/story/2020-07-13/newsom-california-county-rollback-reopening-coronavirus">https://www.latimes.com/california/story/2020-07-13/newsom-california-county-rollback-reopening-coronavirus</a>                                                                                                                                                                                                                                                                                                                                                 |
| Glenn  | 13-Jul-20 | <a href="https://www.countyofglenn.net/news/public-health-public-information/20200713/glenn-county-close-additional-business-sectors">https://www.countyofglenn.net/news/public-health-public-information/20200713/glenn-county-close-additional-business-sectors</a>                                                                                                                                                                                                                                                                                                                 |
| Glenn  | 17-Jul-20 | <a href="https://www.cdph.ca.gov/Programs/CID/DCDC/CDPH%20Document%20Library/COVID-19/Schools%20Reopening%20Recommendations.pdf">https://www.cdph.ca.gov/Programs/CID/DCDC/CDPH%20Document%20Library/COVID-19/Schools%20Reopening%20Recommendations.pdf</a>                                                                                                                                                                                                                                                                                                                           |
| Glenn  | 4-Aug-20  | <a href="https://www.countyofglenn.net/news/public-health-public-information/20200804/2nd-glenn-county-resident-covid-19-death">https://www.countyofglenn.net/news/public-health-public-information/20200804/2nd-glenn-county-resident-covid-19-death</a>                                                                                                                                                                                                                                                                                                                             |
| Glenn  | 28-Aug-20 | <a href="https://abc7news.com/ca-reopneing-phases-covid19cagov-gavin-newsom-update-california-salon-reopening/6393805/">https://abc7news.com/ca-reopneing-phases-covid19cagov-gavin-newsom-update-california-salon-reopening/6393805/</a>                                                                                                                                                                                                                                                                                                                                             |

|          |           |                                                                                                                                                                                                                                                                                                                                                                                                                                                                                                                                                                                       |
|----------|-----------|---------------------------------------------------------------------------------------------------------------------------------------------------------------------------------------------------------------------------------------------------------------------------------------------------------------------------------------------------------------------------------------------------------------------------------------------------------------------------------------------------------------------------------------------------------------------------------------|
| Glenn    | 22-Sep-20 | <a href="https://files.covid19.ca.gov/pdf/guidance-expanded-personal-care-services--en.pdf">https://files.covid19.ca.gov/pdf/guidance-expanded-personal-care-services--en.pdf</a>                                                                                                                                                                                                                                                                                                                                                                                                     |
| Glenn    | 9-Oct-20  | <a href="https://wp.sbcounty.gov/cao/countywire/?p=9160#:~:text=Private%20outdoor%20gatherings%20of%20three%20households%20now%20allowed%20throughout%20the%20county%2C%20state,-Published%20October%209&amp;text=Private%20outdoor%20gatherings%20of%20people,Gavin%20Newsom%20on%20Friday.">https://wp.sbcounty.gov/cao/countywire/?p=9160#:~:text=Private%20outdoor%20gatherings%20of%20three%20households%20now%20allowed%20throughout%20the%20county%2C%20state,-Published%20October%209&amp;text=Private%20outdoor%20gatherings%20of%20people,Gavin%20Newsom%20on%20Friday.</a> |
| Glenn    | 27-Oct-20 | <a href="https://projects.sfchronicle.com/2020/coronavirus-map/california-reopening/">https://projects.sfchronicle.com/2020/coronavirus-map/california-reopening/</a>                                                                                                                                                                                                                                                                                                                                                                                                                 |
| Glenn    | 13-Nov-20 | <a href="https://www.cdph.ca.gov/Programs/CID/DCDC/Pages/COVID-19/Guidance-for-the-Prevention-of-COVID-19-Transmission-for-Gatherings-November-2020.aspx">https://www.cdph.ca.gov/Programs/CID/DCDC/Pages/COVID-19/Guidance-for-the-Prevention-of-COVID-19-Transmission-for-Gatherings-November-2020.aspx</a>                                                                                                                                                                                                                                                                         |
| Glenn    | 16-Nov-20 | <a href="https://www.cdph.ca.gov/Programs/CID/DCDC/Pages/COVID-19/guidance-for-face-coverings.aspx">https://www.cdph.ca.gov/Programs/CID/DCDC/Pages/COVID-19/guidance-for-face-coverings.aspx</a>                                                                                                                                                                                                                                                                                                                                                                                     |
| Glenn    | 17-Nov-20 | <a href="https://www.countyofglenn.net/news/press-release-public-health-public-information/20201116/glenn-county-moves-back-tier-1-purple">https://www.countyofglenn.net/news/press-release-public-health-public-information/20201116/glenn-county-moves-back-tier-1-purple</a>                                                                                                                                                                                                                                                                                                       |
| Glenn    | 19-Nov-20 | <a href="https://www.cdph.ca.gov/Programs/CID/DCDC/Pages/COVID-19/limited-stay-at-home-order.aspx">https://www.cdph.ca.gov/Programs/CID/DCDC/Pages/COVID-19/limited-stay-at-home-order.aspx</a>                                                                                                                                                                                                                                                                                                                                                                                       |
| Humboldt | 11-Mar-20 | <a href="https://humboldt.gov.org/CivicAlerts.aspx?AID=2682">https://humboldt.gov.org/CivicAlerts.aspx?AID=2682</a>                                                                                                                                                                                                                                                                                                                                                                                                                                                                   |
| Humboldt | 19-Mar-20 | <a href="https://www.gov.ca.gov/wp-content/uploads/2020/03/3.19.20-attested-EO-N-33-20-COVID-19-HEALTH-ORDER.pdf">https://www.gov.ca.gov/wp-content/uploads/2020/03/3.19.20-attested-EO-N-33-20-COVID-19-HEALTH-ORDER.pdf</a>                                                                                                                                                                                                                                                                                                                                                         |
| Humboldt | 20-Mar-20 | <a href="https://humboldt.gov.org/DocumentCenter/View/84635/Shelter-in-Place-March-20---April-9">https://humboldt.gov.org/DocumentCenter/View/84635/Shelter-in-Place-March-20---April-9</a>                                                                                                                                                                                                                                                                                                                                                                                           |
| Humboldt | 30-Mar-20 | <a href="https://humboldt.gov.org/DocumentCenter/View/84938/Shelter-in-Place---Redlined-March-30">https://humboldt.gov.org/DocumentCenter/View/84938/Shelter-in-Place---Redlined-March-30</a>                                                                                                                                                                                                                                                                                                                                                                                         |
| Humboldt | 28-Apr-20 | <a href="https://humboldt.gov.org/DocumentCenter/View/85688/Wear-Facial-Coverings---Revised-Effective-April-28-until-Rescinded">https://humboldt.gov.org/DocumentCenter/View/85688/Wear-Facial-Coverings---Revised-Effective-April-28-until-Rescinded</a>                                                                                                                                                                                                                                                                                                                             |
| Humboldt | 6-May-20  | <a href="https://humboldt.gov.org/CivicAlerts.aspx?AID=2822">https://humboldt.gov.org/CivicAlerts.aspx?AID=2822</a>                                                                                                                                                                                                                                                                                                                                                                                                                                                                   |
| Humboldt | 19-May-20 | <a href="https://humboldt.gov.org/DocumentCenter/View/86403/Supplement-to-Shelter-in-Place-May-19---June-17">https://humboldt.gov.org/DocumentCenter/View/86403/Supplement-to-Shelter-in-Place-May-19---June-17</a>                                                                                                                                                                                                                                                                                                                                                                   |
| Humboldt | 28-May-20 | <a href="https://krctv.com/north-coast-news/eureka-local-news/humboldts-list-of-certified-dine-in-restaurants-cleared-to-open-friday">https://krctv.com/north-coast-news/eureka-local-news/humboldts-list-of-certified-dine-in-restaurants-cleared-to-open-friday</a>                                                                                                                                                                                                                                                                                                                 |
| Humboldt | 15-Jun-20 | <a href="https://lostcoastoutpost.com/2020/jun/15/next-reopening-phase-starts-friday-certified-hotel/">https://lostcoastoutpost.com/2020/jun/15/next-reopening-phase-starts-friday-certified-hotel/</a>                                                                                                                                                                                                                                                                                                                                                                               |
| Humboldt | 17-Jun-20 | <a href="https://humboldt.gov.org/DocumentCenter/View/87253/Supplement-to-Shelter-in-Place---Revised-Effective-June-17-until-Rescinded">https://humboldt.gov.org/DocumentCenter/View/87253/Supplement-to-Shelter-in-Place---Revised-Effective-June-17-until-Rescinded</a>                                                                                                                                                                                                                                                                                                             |
| Humboldt | 18-Jun-20 | <a href="https://www.cdph.ca.gov/Programs/CID/DCDC/CDPH%20Document%20Library/COVID-19/Guidance-for-Face-Coverings_06-18-2020.pdf">https://www.cdph.ca.gov/Programs/CID/DCDC/CDPH%20Document%20Library/COVID-19/Guidance-for-Face-Coverings_06-18-2020.pdf</a>                                                                                                                                                                                                                                                                                                                         |
| Humboldt | 23-Jun-20 | <a href="https://kymkemp.com/2020/06/23/humboldt-county-clears-most-business-sectors-to-reopen-with-eoc-certification/">https://kymkemp.com/2020/06/23/humboldt-county-clears-most-business-sectors-to-reopen-with-eoc-certification/</a>                                                                                                                                                                                                                                                                                                                                             |
| Humboldt | 13-Jul-20 | <a href="https://www.latimes.com/california/story/2020-07-13/newsom-california-county-rollback-reopening-coronavirus">https://www.latimes.com/california/story/2020-07-13/newsom-california-county-rollback-reopening-coronavirus</a>                                                                                                                                                                                                                                                                                                                                                 |
| Humboldt | 18-Aug-20 | <a href="https://humboldt.gov.org/DocumentCenter/View/88674/Mass-Quarantine-Order">https://humboldt.gov.org/DocumentCenter/View/88674/Mass-Quarantine-Order</a>                                                                                                                                                                                                                                                                                                                                                                                                                       |
| Humboldt | 18-Aug-20 | <a href="https://humboldt.gov.org/DocumentCenter/View/88673/Mass-Isolation-Order">https://humboldt.gov.org/DocumentCenter/View/88673/Mass-Isolation-Order</a>                                                                                                                                                                                                                                                                                                                                                                                                                         |
| Humboldt | 28-Aug-20 | <a href="https://projects.sfchronicle.com/2020/coronavirus-map/california-reopening/">https://projects.sfchronicle.com/2020/coronavirus-map/california-reopening/</a>                                                                                                                                                                                                                                                                                                                                                                                                                 |
| Humboldt | 1-Sep-20  | <a href="https://humboldt.gov.org/DocumentCenter/View/88931/Wear-Facial-Coverings---Revised-Effective-September-3-until-Rescinded">https://humboldt.gov.org/DocumentCenter/View/88931/Wear-Facial-Coverings---Revised-Effective-September-3-until-Rescinded</a>                                                                                                                                                                                                                                                                                                                       |
| Humboldt | 7-Oct-20  | <a href="https://humboldt.gov.org/DocumentCenter/View/89885/OCT07-Yellow-Tier-PDF">https://humboldt.gov.org/DocumentCenter/View/89885/OCT07-Yellow-Tier-PDF</a>                                                                                                                                                                                                                                                                                                                                                                                                                       |
| Humboldt | 9-Oct-20  | <a href="https://wp.sbcounty.gov/cao/countywire/?p=9160#:~:text=Private%20outdoor%20gatherings%20of%20three%20households%20now%20allowed%20throughout%20the%20county%2C%20state,-Published%20October%209&amp;text=Private%20outdoor%20gatherings%20of%20people,Gavin%20Newsom%20on%20Friday.">https://wp.sbcounty.gov/cao/countywire/?p=9160#:~:text=Private%20outdoor%20gatherings%20of%20three%20households%20now%20allowed%20throughout%20the%20county%2C%20state,-Published%20October%209&amp;text=Private%20outdoor%20gatherings%20of%20people,Gavin%20Newsom%20on%20Friday.</a> |

|          |           |                                                                                                                                                                                                                                                                                                               |
|----------|-----------|---------------------------------------------------------------------------------------------------------------------------------------------------------------------------------------------------------------------------------------------------------------------------------------------------------------|
| Humboldt | 12-Oct-20 | <a href="https://humboldt.gov/CivicAlerts.aspx?AID=3342#:~:text=CDPH%20outlines%20the%20following%20requirements,case%20contact%20tracing%20is%20needed.">https://humboldt.gov/CivicAlerts.aspx?AID=3342#:~:text=CDPH%20outlines%20the%20following%20requirements,case%20contact%20tracing%20is%20needed.</a> |
| Humboldt | 3-Nov-20  | <a href="https://humboldt.gov/DocumentCenter/View/90467/Shelter-in-Place---Revised-Effective-November-3-until-Rescinded">https://humboldt.gov/DocumentCenter/View/90467/Shelter-in-Place---Revised-Effective-November-3-until-Rescinded</a>                                                                   |
| Humboldt | 17-Nov-20 | <a href="https://kmpb.com/news/local/40-california-counties-in-purple-tier-including-the-central-valley">https://kmpb.com/news/local/40-california-counties-in-purple-tier-including-the-central-valley</a>                                                                                                   |
| Humboldt | 24-Nov-20 | <a href="https://www.kcra.com/article/california-covid-tiers-update-nov-24/34774234">https://www.kcra.com/article/california-covid-tiers-update-nov-24/34774234</a>                                                                                                                                           |
| Humboldt | 5-Dec-20  | <a href="https://www.gov.ca.gov/wp-content/uploads/2020/12/12.3.20-Stay-at-Home-Order-ICU-Scenario.pdf">https://www.gov.ca.gov/wp-content/uploads/2020/12/12.3.20-Stay-at-Home-Order-ICU-Scenario.pdf</a>                                                                                                     |
| Imperial | 17-Mar-20 | <a href="http://www.icphd.org/media/managed/2019coronavirus/IC_Health_Officer_Order.pdf">http://www.icphd.org/media/managed/2019coronavirus/IC_Health_Officer_Order.pdf</a>                                                                                                                                   |
| Imperial | 19-Mar-20 | <a href="https://kyma.com/news/2020/03/18/city-of-imperial-declares-local-state-of-emergency-due-to-coronavirus/">https://kyma.com/news/2020/03/18/city-of-imperial-declares-local-state-of-emergency-due-to-coronavirus/</a>                                                                                 |
| Imperial | 19-Mar-20 | <a href="https://www.gov.ca.gov/wp-content/uploads/2020/03/3.19.20-attested-EO-N-33-20-COVID-19-HEALTH-ORDER.pdf">https://www.gov.ca.gov/wp-content/uploads/2020/03/3.19.20-attested-EO-N-33-20-COVID-19-HEALTH-ORDER.pdf</a>                                                                                 |
| Imperial | 9-Apr-20  | <a href="http://www.icphd.org/media/managed/2019coronavirus/HO_Order_FC.pdf">http://www.icphd.org/media/managed/2019coronavirus/HO_Order_FC.pdf</a>                                                                                                                                                           |
| Imperial | 9-May-20  | <a href="http://www.icphd.org/media/managed/2019coronavirus/Health_Officer_Order_5_9_20_Amended.pdf">http://www.icphd.org/media/managed/2019coronavirus/Health_Officer_Order_5_9_20_Amended.pdf</a>                                                                                                           |
| Imperial | 17-May-20 | <a href="http://www.icphd.org/media/managed/0covid19orders/Isolation_order.pdf">http://www.icphd.org/media/managed/0covid19orders/Isolation_order.pdf</a>                                                                                                                                                     |
| Imperial | 17-May-20 | <a href="http://www.icphd.org/media/managed/0covid19orders/Quarantine_order.pdf">http://www.icphd.org/media/managed/0covid19orders/Quarantine_order.pdf</a>                                                                                                                                                   |
| Imperial | 26-May-20 | <a href="http://www.icphd.org/media/managed/2019coronavirus/Amended_Health_Officer_Order_5_26_20.pdf">http://www.icphd.org/media/managed/2019coronavirus/Amended_Health_Officer_Order_5_26_20.pdf</a>                                                                                                         |
| Imperial | 14-Jun-20 | <a href="http://www.icphd.org/media/managed/0covid19orders/6_14_20_Amended_Health_Officer_Order_Quarantine_Order.pdf">http://www.icphd.org/media/managed/0covid19orders/6_14_20_Amended_Health_Officer_Order_Quarantine_Order.pdf</a>                                                                         |
| Imperial | 14-Jun-20 | <a href="http://www.icphd.org/media/managed/0covid19orders/6_14_20_Amended_Health_Officer_Order_Isolation_Order.pdf">http://www.icphd.org/media/managed/0covid19orders/6_14_20_Amended_Health_Officer_Order_Isolation_Order.pdf</a>                                                                           |
| Imperial | 18-Jun-20 | <a href="https://www.cdph.ca.gov/Programs/CID/DCDC/CDPH%20Document%20Library/COVID-19/Guidance-for-Face-Coverings_06-18-2020.pdf">https://www.cdph.ca.gov/Programs/CID/DCDC/CDPH%20Document%20Library/COVID-19/Guidance-for-Face-Coverings_06-18-2020.pdf</a>                                                 |
| Imperial | 19-Jun-20 | <a href="http://www.icphd.org/media/managed/0covid19orders/Health_Officer_Order_Amended_june19.pdf">http://www.icphd.org/media/managed/0covid19orders/Health_Officer_Order_Amended_june19.pdf</a>                                                                                                             |
| Imperial | 28-Jun-20 | <a href="https://www.cdph.ca.gov/Programs/CID/DCDC/Pages/COVID-19/Bar-Closure-Guidance.aspx">https://www.cdph.ca.gov/Programs/CID/DCDC/Pages/COVID-19/Bar-Closure-Guidance.aspx</a>                                                                                                                           |
| Imperial | 1-Jul-20  | <a href="https://www.desertsun.com/story/news/2020/07/01/newsom-closes-bars-indoor-operations-restaurants-ahead-fourth-july/5355575002/">https://www.desertsun.com/story/news/2020/07/01/newsom-closes-bars-indoor-operations-restaurants-ahead-fourth-july/5355575002/</a>                                   |
| Imperial | 1-Jul-20  | <a href="http://www.icphd.org/media/managed/0covid19orders/Amended_Health_Officer_Order_7_1_2020.pdf">http://www.icphd.org/media/managed/0covid19orders/Amended_Health_Officer_Order_7_1_2020.pdf</a>                                                                                                         |
| Imperial | 2-Jul-20  | <a href="http://www.icphd.org/media/managed/0covid19orders/Amended_Health_Officer_Order_Additional_Guidance_for_Religious_Services_7_2_20.pdf">http://www.icphd.org/media/managed/0covid19orders/Amended_Health_Officer_Order_Additional_Guidance_for_Religious_Services_7_2_20.pdf</a>                       |
| Imperial | 13-Jul-20 | <a href="https://www.latimes.com/california/story/2020-07-13/newsom-california-county-rollback-reopening-coronavirus">https://www.latimes.com/california/story/2020-07-13/newsom-california-county-rollback-reopening-coronavirus</a>                                                                         |
| Imperial | 13-Jul-20 | <a href="https://covid19.ca.gov/roadmap-counties/">https://covid19.ca.gov/roadmap-counties/</a>                                                                                                                                                                                                               |
| Imperial | 17-Jul-20 | <a href="https://www.cdph.ca.gov/Programs/CID/DCDC/CDPH%20Document%20Library/COVID-19/Schools%20Reopening%20Recommendations.pdf">https://www.cdph.ca.gov/Programs/CID/DCDC/CDPH%20Document%20Library/COVID-19/Schools%20Reopening%20Recommendations.pdf</a>                                                   |
| Imperial | 25-Aug-20 | <a href="http://www.icphd.org/media/managed/healthofficerorders/Health_Officer_Order_Amended_8_25_2020.pdf">http://www.icphd.org/media/managed/healthofficerorders/Health_Officer_Order_Amended_8_25_2020.pdf</a>                                                                                             |
| Imperial | 28-Aug-20 | <a href="http://www.icphd.org/media/managed/healthofficerorders/Health_Officer_Order_8_30_2020_v2_002_002_.pdf">http://www.icphd.org/media/managed/healthofficerorders/Health_Officer_Order_8_30_2020_v2_002_002_.pdf</a>                                                                                     |
| Imperial | 22-Sep-20 | <a href="http://www.icphd.org/media/managed/0covid19orders/Amended_Health_Officer_Order_9_22_2020_v2_docx.pdf">http://www.icphd.org/media/managed/0covid19orders/Amended_Health_Officer_Order_9_22_2020_v2_docx.pdf</a>                                                                                       |

|          |           |                                                                                                                                                                                                                                                                                                                                                                                                                                                                                                                                                                                       |
|----------|-----------|---------------------------------------------------------------------------------------------------------------------------------------------------------------------------------------------------------------------------------------------------------------------------------------------------------------------------------------------------------------------------------------------------------------------------------------------------------------------------------------------------------------------------------------------------------------------------------------|
| Imperial | 9-Oct-20  | <a href="https://wp.sbcounty.gov/cao/countywire/?p=9160#:~:text=Private%20outdoor%20gatherings%20of%20three%20households%20now%20allowed%20throughout%20the%20county%2C%20state,-Published%20October%209&amp;text=Private%20outdoor%20gatherings%20of%20people,Gavin%20Newsom%20on%20Friday.">https://wp.sbcounty.gov/cao/countywire/?p=9160#:~:text=Private%20outdoor%20gatherings%20of%20three%20households%20now%20allowed%20throughout%20the%20county%2C%20state,-Published%20October%209&amp;text=Private%20outdoor%20gatherings%20of%20people,Gavin%20Newsom%20on%20Friday.</a> |
| Imperial | 10-Oct-20 | <a href="http://www.icphd.org/media/managed/healthofficerorders/Amended_Health_Officer_Order_Private_Gatherings_10_10_20.pdf">http://www.icphd.org/media/managed/healthofficerorders/Amended_Health_Officer_Order_Private_Gatherings_10_10_20.pdf</a>                                                                                                                                                                                                                                                                                                                                 |
| Imperial | 22-Oct-20 | <a href="http://www.icphd.org/media/managed/0covid19orders/Amended_Health_Officer_Order_10_22_2020_docx.pdf">http://www.icphd.org/media/managed/0covid19orders/Amended_Health_Officer_Order_10_22_2020_docx.pdf</a>                                                                                                                                                                                                                                                                                                                                                                   |
| Imperial | 19-Nov-20 | <a href="http://www.icphd.org/media/managed/healthofficerorders/Health_Officer_Order_Limited_Stay_at_Home_Order_11_20_2020_docx.pdf">http://www.icphd.org/media/managed/healthofficerorders/Health_Officer_Order_Limited_Stay_at_Home_Order_11_20_2020_docx.pdf</a>                                                                                                                                                                                                                                                                                                                   |
| Imperial | 19-Nov-20 | <a href="https://www.cdph.ca.gov/Programs/CID/DCDC/Pages/COVID-19/limited-stay-at-home-order.aspx">https://www.cdph.ca.gov/Programs/CID/DCDC/Pages/COVID-19/limited-stay-at-home-order.aspx</a>                                                                                                                                                                                                                                                                                                                                                                                       |
| Imperial | 5-Dec-20  | <a href="https://www.gov.ca.gov/wp-content/uploads/2020/12/12.3.20-Stay-at-Home-Order-ICU-Scenario.pdf">https://www.gov.ca.gov/wp-content/uploads/2020/12/12.3.20-Stay-at-Home-Order-ICU-Scenario.pdf</a>                                                                                                                                                                                                                                                                                                                                                                             |
| Imperial | 5-Dec-20  | <a href="http://www.icphd.org/media/managed/healthofficerorders/Health_Officer_Order_12_05_2020_v2_docx.pdf">http://www.icphd.org/media/managed/healthofficerorders/Health_Officer_Order_12_05_2020_v2_docx.pdf</a>                                                                                                                                                                                                                                                                                                                                                                   |
| Inyo     | 16-Mar-20 | <a href="https://www.inyocounty.us/sites/default/files/2020-03/Public%20Health%20Emergency%20press%20release.Mar%2016.2020.pdf">https://www.inyocounty.us/sites/default/files/2020-03/Public%20Health%20Emergency%20press%20release.Mar%2016.2020.pdf</a>                                                                                                                                                                                                                                                                                                                             |
| Inyo     | 19-Mar-20 | <a href="https://www.gov.ca.gov/wp-content/uploads/2020/03/3.19.20-attested-EO-N-33-20-COVID-19-HEALTH-ORDER.pdf">https://www.gov.ca.gov/wp-content/uploads/2020/03/3.19.20-attested-EO-N-33-20-COVID-19-HEALTH-ORDER.pdf</a>                                                                                                                                                                                                                                                                                                                                                         |
| Inyo     | 20-Mar-20 | <a href="https://www.inyocounty.us/sites/default/files/2020-03/ORDER_3.20.20_0.pdf">https://www.inyocounty.us/sites/default/files/2020-03/ORDER_3.20.20_0.pdf</a>                                                                                                                                                                                                                                                                                                                                                                                                                     |
| Inyo     | 31-Mar-20 | <a href="https://www.inyocounty.us/sites/default/files/2020-04/Short%20Term%20Lodging-EXTENDED.pdf">https://www.inyocounty.us/sites/default/files/2020-04/Short%20Term%20Lodging-EXTENDED.pdf</a>                                                                                                                                                                                                                                                                                                                                                                                     |
| Inyo     | 6-Apr-20  | <a href="https://www.inyocounty.us/covid-19/press-releases/news/covid-19-preventative-measures">https://www.inyocounty.us/covid-19/press-releases/news/covid-19-preventative-measures</a>                                                                                                                                                                                                                                                                                                                                                                                             |
| Inyo     | 23-Apr-20 | <a href="https://www.inyocounty.us/sites/default/files/2020-04/Short%20Term%20Lodging-EXTENDED.pdf">https://www.inyocounty.us/sites/default/files/2020-04/Short%20Term%20Lodging-EXTENDED.pdf</a>                                                                                                                                                                                                                                                                                                                                                                                     |
| Inyo     | 27-Apr-20 | <a href="https://www.inyocounty.us/sites/default/files/2020-04/2020-04-27%20INYO%20Health%20Officer%20Order%20-%20Face%20Coverings%20LTC-SNF-Residential%20settings.pdf">https://www.inyocounty.us/sites/default/files/2020-04/2020-04-27%20INYO%20Health%20Officer%20Order%20-%20Face%20Coverings%20LTC-SNF-Residential%20settings.pdf</a>                                                                                                                                                                                                                                           |
| Inyo     | 8-May-20  | <a href="https://www.inyocounty.us/sites/default/files/2020-08/05.08.20%20Inyo%20HO%20Order%20RE%20Quarantine%20Isolation%202.pdf">https://www.inyocounty.us/sites/default/files/2020-08/05.08.20%20Inyo%20HO%20Order%20RE%20Quarantine%20Isolation%202.pdf</a>                                                                                                                                                                                                                                                                                                                       |
| Inyo     | 8-May-20  | <a href="https://www.inyocounty.us/covid-19/press-releases/news/update-inyo-countys-covid-19-response">https://www.inyocounty.us/covid-19/press-releases/news/update-inyo-countys-covid-19-response</a>                                                                                                                                                                                                                                                                                                                                                                               |
| Inyo     | 8-May-20  | <a href="https://www.inyocounty.us/sites/default/files/2020-05/Rescind-Certain-Local-Health-Orders_5.8.20.pdf">https://www.inyocounty.us/sites/default/files/2020-05/Rescind-Certain-Local-Health-Orders_5.8.20.pdf</a>                                                                                                                                                                                                                                                                                                                                                               |
| Inyo     | 15-May-20 | <a href="https://www.inyocounty.us/covid-19/press-releases/news/local-variance-attestation-approved">https://www.inyocounty.us/covid-19/press-releases/news/local-variance-attestation-approved</a>                                                                                                                                                                                                                                                                                                                                                                                   |
| Inyo     | 19-May-20 | <a href="https://www.inyoregister.com/content/state-approves-county-covid-19-variance-request">https://www.inyoregister.com/content/state-approves-county-covid-19-variance-request</a>                                                                                                                                                                                                                                                                                                                                                                                               |
| Inyo     | 25-May-20 | <a href="https://www.inyocounty.us/covid-19/press-releases/news/short-term-rental-update">https://www.inyocounty.us/covid-19/press-releases/news/short-term-rental-update</a>                                                                                                                                                                                                                                                                                                                                                                                                         |
| Inyo     | 26-May-20 | <a href="https://www.vcstar.com/story/news/2020/05/26/coronavirus-california-approves-reopening-barbershops-hair-salons/5261851002/">https://www.vcstar.com/story/news/2020/05/26/coronavirus-california-approves-reopening-barbershops-hair-salons/5261851002/</a>                                                                                                                                                                                                                                                                                                                   |
| Inyo     | 11-Jun-20 | <a href="https://ktla.com/news/california/california-reopens-to-tourists-but-with-changes-to-hotels-zoos-and-more/#:~:text=The%20state%20is%20giving%20the,Gov.&amp;text=Newsom%20issued%20a%20stay%20at,stores%20and%20restaurants%20to%20reopen.">https://ktla.com/news/california/california-reopens-to-tourists-but-with-changes-to-hotels-zoos-and-more/#:~:text=The%20state%20is%20giving%20the,Gov.&amp;text=Newsom%20issued%20a%20stay%20at,stores%20and%20restaurants%20to%20reopen.</a>                                                                                     |
| Inyo     | 18-Jun-20 | <a href="https://www.cdph.ca.gov/Programs/CID/DCDC/CDPH%20Document%20Library/COVID-19/Guidance-for-Face-Coverings_06-18-2020.pdf">https://www.cdph.ca.gov/Programs/CID/DCDC/CDPH%20Document%20Library/COVID-19/Guidance-for-Face-Coverings_06-18-2020.pdf</a>                                                                                                                                                                                                                                                                                                                         |
| Inyo     | 19-Jun-20 | <a href="https://www.sfchronicle.com/health/article/When-will-nail-salons-tattoo-parlors-reopen-in-15337063.php">https://www.sfchronicle.com/health/article/When-will-nail-salons-tattoo-parlors-reopen-in-15337063.php</a>                                                                                                                                                                                                                                                                                                                                                           |
| Inyo     | 13-Jul-20 | <a href="https://www.inyocounty.us/sites/default/files/2020-07/7.13.20-Universal-Face-Coverings-REVISED.pdf">https://www.inyocounty.us/sites/default/files/2020-07/7.13.20-Universal-Face-Coverings-REVISED.pdf</a>                                                                                                                                                                                                                                                                                                                                                                   |
| Inyo     | 13-Jul-20 | <a href="https://www.latimes.com/california/story/2020-07-13/newsom-california-county-rollback-reopening-coronavirus">https://www.latimes.com/california/story/2020-07-13/newsom-california-county-rollback-reopening-coronavirus</a>                                                                                                                                                                                                                                                                                                                                                 |
| Inyo     | 19-Aug-20 | <a href="https://www.inyocounty.us/covid-19/press-releases/news/08172020-covid-19-situation-update">https://www.inyocounty.us/covid-19/press-releases/news/08172020-covid-19-situation-update</a>                                                                                                                                                                                                                                                                                                                                                                                     |
| Inyo     | 28-Aug-20 | <a href="https://abc7news.com/ca-reopneing-phases-covid19cagov-gavin-newsom-update-california-salon-reopening/6393805/">https://abc7news.com/ca-reopneing-phases-covid19cagov-gavin-newsom-update-california-salon-reopening/6393805/</a>                                                                                                                                                                                                                                                                                                                                             |



|      |           |                                                                                                                                                                                                                                                                                                                                                                                                                                                                                                                                                                                       |
|------|-----------|---------------------------------------------------------------------------------------------------------------------------------------------------------------------------------------------------------------------------------------------------------------------------------------------------------------------------------------------------------------------------------------------------------------------------------------------------------------------------------------------------------------------------------------------------------------------------------------|
| Inyo | 15-Sep-20 | <a href="https://www.inyocounty.us/covid-19/reopening-inyo-businesses">https://www.inyocounty.us/covid-19/reopening-inyo-businesses</a>                                                                                                                                                                                                                                                                                                                                                                                                                                               |
| Inyo | 6-Oct-20  | <a href="https://sierrawave.net/inyo-county-moves-to-new-tier-more-local-businesses-open/">https://sierrawave.net/inyo-county-moves-to-new-tier-more-local-businesses-open/</a>                                                                                                                                                                                                                                                                                                                                                                                                       |
| Inyo | 9-Oct-20  | <a href="https://wp.sbcounty.gov/cao/countywire/?p=9160#:~:text=Private%20outdoor%20gatherings%20of%20three%20households%20now%20allowed%20throughout%20the%20county%2C%20state,-Published%20October%209&amp;text=Private%20outdoor%20gatherings%20of%20people,Gavin%20Newsom%20on%20Friday.">https://wp.sbcounty.gov/cao/countywire/?p=9160#:~:text=Private%20outdoor%20gatherings%20of%20three%20households%20now%20allowed%20throughout%20the%20county%2C%20state,-Published%20October%209&amp;text=Private%20outdoor%20gatherings%20of%20people,Gavin%20Newsom%20on%20Friday.</a> |
| Inyo | 13-Nov-20 | <a href="https://www.cdph.ca.gov/Programs/CID/DCDC/Pages/COVID-19/Guidance-for-the-Prevention-of-COVID-19-Transmission-for-Gatherings-November-2020.aspx">https://www.cdph.ca.gov/Programs/CID/DCDC/Pages/COVID-19/Guidance-for-the-Prevention-of-COVID-19-Transmission-for-Gatherings-November-2020.aspx</a>                                                                                                                                                                                                                                                                         |
| Inyo | 28-Nov-20 | <a href="https://sierrawave.net/inyo-county-moves-to-red-tier/">https://sierrawave.net/inyo-county-moves-to-red-tier/</a>                                                                                                                                                                                                                                                                                                                                                                                                                                                             |
| Inyo | 5-Dec-20  | <a href="https://www.gov.ca.gov/wp-content/uploads/2020/12/12.3.20-Stay-at-Home-Order-ICU-Scenario.pdf">https://www.gov.ca.gov/wp-content/uploads/2020/12/12.3.20-Stay-at-Home-Order-ICU-Scenario.pdf</a>                                                                                                                                                                                                                                                                                                                                                                             |
| Kern | 16-Mar-20 | <a href="https://www.kget.com/health/coronavirus/kern-county-officials-likely-to-recommend-countywide-state-of-emergency/">https://www.kget.com/health/coronavirus/kern-county-officials-likely-to-recommend-countywide-state-of-emergency/</a>                                                                                                                                                                                                                                                                                                                                       |
| Kern | 17-Mar-20 | <a href="https://kernpublichealth.com/wp-content/uploads/2020/03/First-COVID19-case-Kern.pdf">https://kernpublichealth.com/wp-content/uploads/2020/03/First-COVID19-case-Kern.pdf</a>                                                                                                                                                                                                                                                                                                                                                                                                 |
| Kern | 19-Mar-20 | <a href="https://www.gov.ca.gov/wp-content/uploads/2020/03/3.19.20-attested-EO-N-33-20-COVID-19-HEALTH-ORDER.pdf">https://www.gov.ca.gov/wp-content/uploads/2020/03/3.19.20-attested-EO-N-33-20-COVID-19-HEALTH-ORDER.pdf</a>                                                                                                                                                                                                                                                                                                                                                         |
| Kern | 30-Mar-20 | <a href="https://www.kerncounty.com/Home/Components/News/News/229/35241?backlist=%2Fgovernment%2Fcoronavirus-covid-19-resources-for-kern-county-residents">https://www.kerncounty.com/Home/Components/News/News/229/35241?backlist=%2Fgovernment%2Fcoronavirus-covid-19-resources-for-kern-county-residents</a>                                                                                                                                                                                                                                                                       |
| Kern | 2-Apr-20  | <a href="https://kernpublichealth.com/wp-content/uploads/2020/04/Order-of-the-Health-Officer.pdf">https://kernpublichealth.com/wp-content/uploads/2020/04/Order-of-the-Health-Officer.pdf</a>                                                                                                                                                                                                                                                                                                                                                                                         |
| Kern | 7-Apr-20  | <a href="https://kernpublichealth.com/wp-content/uploads/2020/04/Coronavirus-Media-Advisory-English-4-7-2020.pdf">https://kernpublichealth.com/wp-content/uploads/2020/04/Coronavirus-Media-Advisory-English-4-7-2020.pdf</a>                                                                                                                                                                                                                                                                                                                                                         |
| Kern | 16-Apr-20 | <a href="https://kernpublichealth.com/wp-content/uploads/2020/04/Letterhead-Order-of-Health-Officer.pdf">https://kernpublichealth.com/wp-content/uploads/2020/04/Letterhead-Order-of-Health-Officer.pdf</a>                                                                                                                                                                                                                                                                                                                                                                           |
| Kern | 2-May-20  | <a href="https://kernpublichealth.com/wp-content/uploads/2020/05/Health-Officer-Order-Rescinded.pdf">https://kernpublichealth.com/wp-content/uploads/2020/05/Health-Officer-Order-Rescinded.pdf</a>                                                                                                                                                                                                                                                                                                                                                                                   |
| Kern | 7-May-20  | <a href="https://www.turnto23.com/news/local-news/newsom-unveils-rules-and-provides-roadmap-for-phase-two-of-reopening">https://www.turnto23.com/news/local-news/newsom-unveils-rules-and-provides-roadmap-for-phase-two-of-reopening</a>                                                                                                                                                                                                                                                                                                                                             |
| Kern | 21-May-20 | <a href="https://www.bakersfield.com/news/state-gives-kern-ok-to-reopen-restaurants-malls-retail/article_6f0075d6-9af4-11ea-9efe-db669bc3f3e1.html">https://www.bakersfield.com/news/state-gives-kern-ok-to-reopen-restaurants-malls-retail/article_6f0075d6-9af4-11ea-9efe-db669bc3f3e1.html</a>                                                                                                                                                                                                                                                                                     |
| Kern | 5-Jun-20  | <a href="https://www.tehachapinews.com/news/kern-county-moves-into-stage-3-reopening/article_553b5d3c-a7b0-11ea-9fb9-332b7bbcb307.html">https://www.tehachapinews.com/news/kern-county-moves-into-stage-3-reopening/article_553b5d3c-a7b0-11ea-9fb9-332b7bbcb307.html</a>                                                                                                                                                                                                                                                                                                             |
| Kern | 18-Jun-20 | <a href="https://www.cdph.ca.gov/Programs/CID/DCDC/CDPH%20Document%20Library/COVID-19/Guidance-for-Face-Coverings_06-18-2020.pdf">https://www.cdph.ca.gov/Programs/CID/DCDC/CDPH%20Document%20Library/COVID-19/Guidance-for-Face-Coverings_06-18-2020.pdf</a>                                                                                                                                                                                                                                                                                                                         |
| Kern | 19-Jun-20 | <a href="https://www.turnto23.com/open/what-you-can-expect-as-nail-salons-reopen-in-kern-county">https://www.turnto23.com/open/what-you-can-expect-as-nail-salons-reopen-in-kern-county</a>                                                                                                                                                                                                                                                                                                                                                                                           |
| Kern | 28-Jun-20 | <a href="https://www.latimes.com/california/story/2020-06-28/gavin-newsom-orders-bars-closed-in-7-california-counties-due-to-coronavirus-spread">https://www.latimes.com/california/story/2020-06-28/gavin-newsom-orders-bars-closed-in-7-california-counties-due-to-coronavirus-spread</a>                                                                                                                                                                                                                                                                                           |
| Kern | 1-Jul-20  | <a href="https://kernpublichealth.com/wp-content/uploads/2020/07/Order-Closing-Indoor-Services-and-Sectors-Kern.pdf">https://kernpublichealth.com/wp-content/uploads/2020/07/Order-Closing-Indoor-Services-and-Sectors-Kern.pdf</a>                                                                                                                                                                                                                                                                                                                                                   |
| Kern | 13-Jul-20 | <a href="https://www.latimes.com/california/story/2020-07-13/newsom-california-county-rollback-reopening-coronavirus">https://www.latimes.com/california/story/2020-07-13/newsom-california-county-rollback-reopening-coronavirus</a>                                                                                                                                                                                                                                                                                                                                                 |
| Kern | 24-Jul-20 | <a href="https://www.taftmidwaydriller.com/news/20200724/kern-county-gets-shut-down-orders">https://www.taftmidwaydriller.com/news/20200724/kern-county-gets-shut-down-orders</a>                                                                                                                                                                                                                                                                                                                                                                                                     |
| Kern | 28-Aug-20 | <a href="https://abc7news.com/ca-reopneing-phases-covid19cagov-gavin-newsom-update-california-salon-reopening/6393805/">https://abc7news.com/ca-reopneing-phases-covid19cagov-gavin-newsom-update-california-salon-reopening/6393805/</a>                                                                                                                                                                                                                                                                                                                                             |
| Kern | 22-Sep-20 | <a href="https://files.covid19.ca.gov/pdf/guidance-expanded-personal-care-services--en.pdf">https://files.covid19.ca.gov/pdf/guidance-expanded-personal-care-services--en.pdf</a>                                                                                                                                                                                                                                                                                                                                                                                                     |
| Kern | 9-Oct-20  | <a href="https://wp.sbcounty.gov/cao/countywire/?p=9160#:~:text=Private%20outdoor%20gatherings%20of%20three%20households%20now%20allowed%20throughout%20the%20county%2C%20state,-Published%20October%209&amp;text=Private%20outdoor%20gatherings%20of%20people,Gavin%20Newsom%20on%20Friday.">https://wp.sbcounty.gov/cao/countywire/?p=9160#:~:text=Private%20outdoor%20gatherings%20of%20three%20households%20now%20allowed%20throughout%20the%20county%2C%20state,-Published%20October%209&amp;text=Private%20outdoor%20gatherings%20of%20people,Gavin%20Newsom%20on%20Friday.</a> |
| Kern | 13-Oct-20 | <a href="https://projects.sfchronicle.com/2020/coronavirus-map/california-reopening/">https://projects.sfchronicle.com/2020/coronavirus-map/california-reopening/</a>                                                                                                                                                                                                                                                                                                                                                                                                                 |
| Kern | 13-Nov-20 | <a href="https://www.cdph.ca.gov/Programs/CID/DCDC/Pages/COVID-19/Guidance-for-the-Prevention-of-COVID-19-Transmission-for-Gatherings-November-2020.aspx">https://www.cdph.ca.gov/Programs/CID/DCDC/Pages/COVID-19/Guidance-for-the-Prevention-of-COVID-19-Transmission-for-Gatherings-November-2020.aspx</a>                                                                                                                                                                                                                                                                         |

|       |           |                                                                                                                                                                                                                                                                                                                                                                                                                                                                                                                                                                                       |
|-------|-----------|---------------------------------------------------------------------------------------------------------------------------------------------------------------------------------------------------------------------------------------------------------------------------------------------------------------------------------------------------------------------------------------------------------------------------------------------------------------------------------------------------------------------------------------------------------------------------------------|
| Kern  | 16-Nov-20 | <a href="https://www.cdph.ca.gov/Programs/CID/DCDC/Pages/COVID-19/guidance-for-face-coverings.aspx">https://www.cdph.ca.gov/Programs/CID/DCDC/Pages/COVID-19/guidance-for-face-coverings.aspx</a>                                                                                                                                                                                                                                                                                                                                                                                     |
| Kern  | 17-Nov-20 | <a href="https://kmpb.com/news/local/40-california-counties-in-purple-tier-including-the-central-valley">https://kmpb.com/news/local/40-california-counties-in-purple-tier-including-the-central-valley</a>                                                                                                                                                                                                                                                                                                                                                                           |
| Kern  | 19-Nov-20 | <a href="https://www.cdph.ca.gov/Programs/CID/DCDC/Pages/COVID-19/limited-stay-at-home-order.aspx">https://www.cdph.ca.gov/Programs/CID/DCDC/Pages/COVID-19/limited-stay-at-home-order.aspx</a>                                                                                                                                                                                                                                                                                                                                                                                       |
| Kern  | 5-Dec-20  | <a href="https://www.gov.ca.gov/wp-content/uploads/2020/12/12.3.20-Stay-at-Home-Order-ICU-Scenario.pdf">https://www.gov.ca.gov/wp-content/uploads/2020/12/12.3.20-Stay-at-Home-Order-ICU-Scenario.pdf</a>                                                                                                                                                                                                                                                                                                                                                                             |
| Kings | 31-Jan-20 | <a href="https://www.countyofkings.com/home/showdocument?id=20917">https://www.countyofkings.com/home/showdocument?id=20917</a>                                                                                                                                                                                                                                                                                                                                                                                                                                                       |
| Kings | 28-Feb-20 | <a href="https://www.countyofkings.com/home/showdocument?id=20917">https://www.countyofkings.com/home/showdocument?id=20917</a>                                                                                                                                                                                                                                                                                                                                                                                                                                                       |
| Kings | 5-Mar-20  | <a href="https://www.countyofkings.com/home/showdocument?id=20931">https://www.countyofkings.com/home/showdocument?id=20931</a>                                                                                                                                                                                                                                                                                                                                                                                                                                                       |
| Kings | 12-Mar-20 | <a href="https://www.countyofkings.com/home/showdocument?id=20949">https://www.countyofkings.com/home/showdocument?id=20949</a>                                                                                                                                                                                                                                                                                                                                                                                                                                                       |
| Kings | 17-Mar-20 | <a href="https://www.countyofkings.com/home/showdocument?id=21261">https://www.countyofkings.com/home/showdocument?id=21261</a>                                                                                                                                                                                                                                                                                                                                                                                                                                                       |
| Kings | 17-Mar-20 | <a href="https://www.fresnobee.com/news/local/article241286881.html#:~:text=Kings%20became%20the%20latest%20central,seek%20state%20and%20federal%20assistance.">https://www.fresnobee.com/news/local/article241286881.html#:~:text=Kings%20became%20the%20latest%20central,seek%20state%20and%20federal%20assistance.</a>                                                                                                                                                                                                                                                             |
| Kings | 19-Mar-20 | <a href="https://www.gov.ca.gov/wp-content/uploads/2020/03/3.19.20-attested-EO-N-33-20-COVID-19-HEALTH-ORDER.pdf">https://www.gov.ca.gov/wp-content/uploads/2020/03/3.19.20-attested-EO-N-33-20-COVID-19-HEALTH-ORDER.pdf</a>                                                                                                                                                                                                                                                                                                                                                         |
| Kings | 2-Apr-20  | <a href="https://www.countyofkings.com/home/showdocument?id=22129">https://www.countyofkings.com/home/showdocument?id=22129</a>                                                                                                                                                                                                                                                                                                                                                                                                                                                       |
| Kings | 8-May-20  | <a href="https://abc30.com/california-stay-at-home-opening-what-phase-is-my-county-phases/6198732/">https://abc30.com/california-stay-at-home-opening-what-phase-is-my-county-phases/6198732/</a>                                                                                                                                                                                                                                                                                                                                                                                     |
| Kings | 20-May-20 | <a href="https://abc30.com/health/kings-county-approved-by-state-for-further-reopening-of-businesses/6200041/">https://abc30.com/health/kings-county-approved-by-state-for-further-reopening-of-businesses/6200041/</a>                                                                                                                                                                                                                                                                                                                                                               |
| Kings | 26-May-20 | <a href="https://www.countyofkings.com/home/showdocument?id=23119">https://www.countyofkings.com/home/showdocument?id=23119</a>                                                                                                                                                                                                                                                                                                                                                                                                                                                       |
| Kings | 12-Jun-20 | <a href="https://www.countyofkings.com/home/showdocument?id=23707">https://www.countyofkings.com/home/showdocument?id=23707</a>                                                                                                                                                                                                                                                                                                                                                                                                                                                       |
| Kings | 12-Jun-20 | <a href="https://www.countyofkings.com/home/showdocument?id=23707">https://www.countyofkings.com/home/showdocument?id=23707</a>                                                                                                                                                                                                                                                                                                                                                                                                                                                       |
| Kings | 18-Jun-20 | <a href="https://www.cdph.ca.gov/Programs/CID/DCDC/CDPH%20Document%20Library/COVID-19/Guidance-for-Face-Coverings_06-18-2020.pdf">https://www.cdph.ca.gov/Programs/CID/DCDC/CDPH%20Document%20Library/COVID-19/Guidance-for-Face-Coverings_06-18-2020.pdf</a>                                                                                                                                                                                                                                                                                                                         |
| Kings | 28-Jun-20 | <a href="https://www.countyofkings.com/home/showdocument?id=23869">https://www.countyofkings.com/home/showdocument?id=23869</a>                                                                                                                                                                                                                                                                                                                                                                                                                                                       |
| Kings | 1-Jul-20  | <a href="http://www.mylemooreleader.com/171499">http://www.mylemooreleader.com/171499</a>                                                                                                                                                                                                                                                                                                                                                                                                                                                                                             |
| Kings | 2-Jul-20  | <a href="https://www.countyofkings.com/Home/ShowDocument?id=23767">https://www.countyofkings.com/Home/ShowDocument?id=23767</a>                                                                                                                                                                                                                                                                                                                                                                                                                                                       |
| Kings | 9-Jul-20  | <a href="https://www.countyofkings.com/home/showdocument?id=23873">https://www.countyofkings.com/home/showdocument?id=23873</a>                                                                                                                                                                                                                                                                                                                                                                                                                                                       |
| Kings | 13-Jul-20 | <a href="https://www.latimes.com/california/story/2020-07-13/newsom-california-county-rollback-reopening-coronavirus">https://www.latimes.com/california/story/2020-07-13/newsom-california-county-rollback-reopening-coronavirus</a>                                                                                                                                                                                                                                                                                                                                                 |
| Kings | 13-Jul-20 | <a href="https://abc30.com/health/kings-county-approved-by-state-for-further-reopening-of-businesses/6200041/">https://abc30.com/health/kings-county-approved-by-state-for-further-reopening-of-businesses/6200041/</a>                                                                                                                                                                                                                                                                                                                                                               |
| Kings | 17-Jul-20 | <a href="https://www.cdph.ca.gov/Programs/CID/DCDC/CDPH%20Document%20Library/COVID-19/Schools%20Reopening%20Recommendations.pdf">https://www.cdph.ca.gov/Programs/CID/DCDC/CDPH%20Document%20Library/COVID-19/Schools%20Reopening%20Recommendations.pdf</a>                                                                                                                                                                                                                                                                                                                           |
| Kings | 28-Aug-20 | <a href="https://www.countyofkings.com/home/showdocument?id=24301">https://www.countyofkings.com/home/showdocument?id=24301</a>                                                                                                                                                                                                                                                                                                                                                                                                                                                       |
| Kings | 22-Sep-20 | <a href="https://files.covid19.ca.gov/pdf/guidance-expanded-personal-care-services--en.pdf">https://files.covid19.ca.gov/pdf/guidance-expanded-personal-care-services--en.pdf</a>                                                                                                                                                                                                                                                                                                                                                                                                     |
| Kings | 9-Oct-20  | <a href="https://wp.sbcounty.gov/cao/countywire/?p=9160#:~:text=Private%20outdoor%20gatherings%20of%20three%20households%20now%20allowed%20throughout%20the%20county%2C%20state,-Published%20October%209&amp;text=Private%20outdoor%20gatherings%20of%20people,Gavin%20Newsom%20on%20Friday.">https://wp.sbcounty.gov/cao/countywire/?p=9160#:~:text=Private%20outdoor%20gatherings%20of%20three%20households%20now%20allowed%20throughout%20the%20county%2C%20state,-Published%20October%209&amp;text=Private%20outdoor%20gatherings%20of%20people,Gavin%20Newsom%20on%20Friday.</a> |

|       |           |                                                                                                                                                                                                                                                                                                                                                           |
|-------|-----------|-----------------------------------------------------------------------------------------------------------------------------------------------------------------------------------------------------------------------------------------------------------------------------------------------------------------------------------------------------------|
| Kings | 13-Oct-20 | <a href="https://www.countyofkings.com/home/showdocument?id=24623">https://www.countyofkings.com/home/showdocument?id=24623</a>                                                                                                                                                                                                                           |
| Kings | 13-Nov-20 | <a href="https://www.cdph.ca.gov/Programs/CID/DCDC/Pages/COVID-19/Guidance-for-the-Prevention-of-COVID-19-Transmission-for-Gatherings-November-2020.aspx">https://www.cdph.ca.gov/Programs/CID/DCDC/Pages/COVID-19/Guidance-for-the-Prevention-of-COVID-19-Transmission-for-Gatherings-November-2020.aspx</a>                                             |
| Kings | 16-Nov-20 | <a href="https://www.cdph.ca.gov/Programs/CID/DCDC/Pages/COVID-19/guidance-for-face-coverings.aspx">https://www.cdph.ca.gov/Programs/CID/DCDC/Pages/COVID-19/guidance-for-face-coverings.aspx</a>                                                                                                                                                         |
| Kings | 17-Nov-20 | <a href="https://www.countyofkings.com/home/showpublisheddocument?id=24869">https://www.countyofkings.com/home/showpublisheddocument?id=24869</a>                                                                                                                                                                                                         |
| Kings | 19-Nov-20 | <a href="https://www.cdph.ca.gov/Programs/CID/DCDC/Pages/COVID-19/limited-stay-at-home-order.aspx">https://www.cdph.ca.gov/Programs/CID/DCDC/Pages/COVID-19/limited-stay-at-home-order.aspx</a>                                                                                                                                                           |
| Kings | 5-Dec-20  | <a href="https://www.gov.ca.gov/wp-content/uploads/2020/12/12.3.20-Stay-at-Home-Order-ICU-Scenario.pdf">https://www.gov.ca.gov/wp-content/uploads/2020/12/12.3.20-Stay-at-Home-Order-ICU-Scenario.pdf</a>                                                                                                                                                 |
| Kings | 5-Dec-20  | <a href="https://www.countyofkings.com/home/showpublisheddocument?id=25027">https://www.countyofkings.com/home/showpublisheddocument?id=25027</a>                                                                                                                                                                                                         |
| Kings | 14-Dec-20 | <a href="https://www.countyofkings.com/home/showpublisheddocument?id=25110">https://www.countyofkings.com/home/showpublisheddocument?id=25110</a>                                                                                                                                                                                                         |
| Lake  | 4-Feb-20  | <a href="http://health.co.lake.ca.us/Assets/Departments/Health/Public+Health+Division/Press+Releases/2020/PR.pdf">http://health.co.lake.ca.us/Assets/Departments/Health/Public+Health+Division/Press+Releases/2020/PR.pdf</a>                                                                                                                             |
| Lake  | 9-Mar-20  | <a href="http://health.co.lake.ca.us/Assets/Departments/Health/Public+Health+Division/Press+Releases/2020/Declaration+of+Local+Health+Emergency+Coronavirus+3-10-20-2.pdf">http://health.co.lake.ca.us/Assets/Departments/Health/Public+Health+Division/Press+Releases/2020/Declaration+of+Local+Health+Emergency+Coronavirus+3-10-20-2.pdf</a>           |
| Lake  | 10-Mar-20 | <a href="http://health.co.lake.ca.us/Assets/Departments/Health/Public+Health+Division/Press+Releases/2020/Press+Release+Local+Health+Declaration+COVID-19+Dr.+Pace+3-10-20.pdf">http://health.co.lake.ca.us/Assets/Departments/Health/Public+Health+Division/Press+Releases/2020/Press+Release+Local+Health+Declaration+COVID-19+Dr.+Pace+3-10-20.pdf</a> |
| Lake  | 16-Mar-20 | <a href="http://health.co.lake.ca.us/Assets/Departments/Health/Public+Health+Division/COVID-19/order_c20-1.pdf">http://health.co.lake.ca.us/Assets/Departments/Health/Public+Health+Division/COVID-19/order_c20-1.pdf</a>                                                                                                                                 |
| Lake  | 16-Mar-20 | <a href="http://health.co.lake.ca.us/Assets/Departments/Health/Public+Health+Division/COVID-19/order_c20-2.pdf">http://health.co.lake.ca.us/Assets/Departments/Health/Public+Health+Division/COVID-19/order_c20-2.pdf</a>                                                                                                                                 |
| Lake  | 18-Mar-20 | <a href="http://health.co.lake.ca.us/Assets/Departments/Health/Public+Health+Division/COVID-19/OrderC20.3.pdf">http://health.co.lake.ca.us/Assets/Departments/Health/Public+Health+Division/COVID-19/OrderC20.3.pdf</a>                                                                                                                                   |
| Lake  | 19-Mar-20 | <a href="https://www.gov.ca.gov/wp-content/uploads/2020/03/3.19.20-attested-EO-N-33-20-COVID-19-HEALTH-ORDER.pdf">https://www.gov.ca.gov/wp-content/uploads/2020/03/3.19.20-attested-EO-N-33-20-COVID-19-HEALTH-ORDER.pdf</a>                                                                                                                             |
| Lake  | 22-Mar-20 | <a href="http://health.co.lake.ca.us/Assets/Departments/Health/Public+Health+Division/COVID-19/Order+of+the+Health+Officer+No.+C20-3-A1.pdf">http://health.co.lake.ca.us/Assets/Departments/Health/Public+Health+Division/COVID-19/Order+of+the+Health+Officer+No.+C20-3-A1.pdf</a>                                                                       |
| Lake  | 26-Mar-20 | <a href="http://health.co.lake.ca.us/Assets/Departments/Health/Public+Health+Division/COVID-19/A+Lake+County-Focused+Coronavirus+Update+3-26-2020.pdf">http://health.co.lake.ca.us/Assets/Departments/Health/Public+Health+Division/COVID-19/A+Lake+County-Focused+Coronavirus+Update+3-26-2020.pdf</a>                                                   |
| Lake  | 30-Mar-20 | <a href="http://health.co.lake.ca.us/Assets/Departments/Health/Public+Health+Division/COVID-19/Lake+County+Order+C20-1+(A1)+English.pdf">http://health.co.lake.ca.us/Assets/Departments/Health/Public+Health+Division/COVID-19/Lake+County+Order+C20-1+(A1)+English.pdf</a>                                                                               |
| Lake  | 5-Apr-20  | <a href="http://health.co.lake.ca.us/Assets/Departments/Health/Public+Health+Division/COVID-19/FirstCase.pdf">http://health.co.lake.ca.us/Assets/Departments/Health/Public+Health+Division/COVID-19/FirstCase.pdf</a>                                                                                                                                     |
| Lake  | 6-Apr-20  | <a href="http://health.co.lake.ca.us/Assets/Departments/Health/Public+Health+Division/COVID-19/sip040620.pdf">http://health.co.lake.ca.us/Assets/Departments/Health/Public+Health+Division/COVID-19/sip040620.pdf</a>                                                                                                                                     |
| Lake  | 6-Apr-20  | <a href="http://health.co.lake.ca.us/Assets/Departments/Health/Public+Health+Division/COVID-19/school040620.pdf">http://health.co.lake.ca.us/Assets/Departments/Health/Public+Health+Division/COVID-19/school040620.pdf</a>                                                                                                                               |
| Lake  | 8-Apr-20  | <a href="http://health.co.lake.ca.us/Assets/Departments/Health/Public+Health+Division/COVID-19/Third+Coronavirus+Case+in+Lake+County.pdf">http://health.co.lake.ca.us/Assets/Departments/Health/Public+Health+Division/COVID-19/Third+Coronavirus+Case+in+Lake+County.pdf</a>                                                                             |
| Lake  | 13-Apr-20 | <a href="http://health.co.lake.ca.us/Assets/Departments/Health/Public+Health+Division/COVID-19/Masking+Strongly+Encouraged+When+in+Public.pdf">http://health.co.lake.ca.us/Assets/Departments/Health/Public+Health+Division/COVID-19/Masking+Strongly+Encouraged+When+in+Public.pdf</a>                                                                   |
| Lake  | 23-Apr-20 | <a href="http://health.co.lake.ca.us/Assets/Departments/Health/Public+Health+Division/COVID-19/update042320.pdf">http://health.co.lake.ca.us/Assets/Departments/Health/Public+Health+Division/COVID-19/update042320.pdf</a>                                                                                                                               |
| Lake  | 24-Apr-20 | <a href="http://health.co.lake.ca.us/Assets/Departments/Health/Public+Health+Division/COVID-19/ORDER+OF+THE+HEALTH+OFFICER+No.+C20-3\$!3b+A5.pdf">http://health.co.lake.ca.us/Assets/Departments/Health/Public+Health+Division/COVID-19/ORDER+OF+THE+HEALTH+OFFICER+No.+C20-3\$!3b+A5.pdf</a>                                                             |
| Lake  | 1-May-20  | <a href="http://www.lakecountyc.ca.gov/Assets/Departments/Health/Public+Health+Division/COVID-19/COVIDhealthordernoC20-04finaldraftfullyexecuted.pdf">http://www.lakecountyc.ca.gov/Assets/Departments/Health/Public+Health+Division/COVID-19/COVIDhealthordernoC20-04finaldraftfullyexecuted.pdf</a>                                                     |
| Lake  | 8-May-20  | <a href="http://www.lakecountyc.ca.gov/Assets/Departments/Health/Public+Health+Division/COVID-19/HO_Order_C20-5_Fully_Executed.pdf">http://www.lakecountyc.ca.gov/Assets/Departments/Health/Public+Health+Division/COVID-19/HO_Order_C20-5_Fully_Executed.pdf</a>                                                                                         |
| Lake  | 18-May-20 | <a href="http://health.co.lake.ca.us/Assets/Departments/Health/Public+Health+Division/COVID-19/051820.pdf">http://health.co.lake.ca.us/Assets/Departments/Health/Public+Health+Division/COVID-19/051820.pdf</a>                                                                                                                                           |

|        |           |                                                                                                                                                                                                                                                                                                                                                                                                                                                                                                                                                                                       |
|--------|-----------|---------------------------------------------------------------------------------------------------------------------------------------------------------------------------------------------------------------------------------------------------------------------------------------------------------------------------------------------------------------------------------------------------------------------------------------------------------------------------------------------------------------------------------------------------------------------------------------|
| Lake   | 21-May-20 | <a href="http://health.co.lake.ca.us/Assets/Departments/Health/Public+Health+Division/COVID-19/20-06.pdf">http://health.co.lake.ca.us/Assets/Departments/Health/Public+Health+Division/COVID-19/20-06.pdf</a>                                                                                                                                                                                                                                                                                                                                                                         |
| Lake   | 26-May-20 | <a href="http://health.co.lake.ca.us/Assets/Departments/Health/Public+Health+Division/COVID-19/Salons052620.pdf">http://health.co.lake.ca.us/Assets/Departments/Health/Public+Health+Division/COVID-19/Salons052620.pdf</a>                                                                                                                                                                                                                                                                                                                                                           |
| Lake   | 28-May-20 | <a href="http://health.co.lake.ca.us/Assets/Departments/Health/Public+Health+Division/COVID-19/C20-06A1.pdf">http://health.co.lake.ca.us/Assets/Departments/Health/Public+Health+Division/COVID-19/C20-06A1.pdf</a>                                                                                                                                                                                                                                                                                                                                                                   |
| Lake   | 4-Jun-20  | <a href="http://health.co.lake.ca.us/Assets/Departments/Health/Public+Health+Division/COVID-19/IndoorDining060420.pdf">http://health.co.lake.ca.us/Assets/Departments/Health/Public+Health+Division/COVID-19/IndoorDining060420.pdf</a>                                                                                                                                                                                                                                                                                                                                               |
| Lake   | 9-Jun-20  | <a href="http://health.co.lake.ca.us/Assets/Departments/Health/Public+Health+Division/COVID-19/13+Business+Sectors+to+Reopen+or+Expand+this+Friday-June+12.pdf">http://health.co.lake.ca.us/Assets/Departments/Health/Public+Health+Division/COVID-19/13+Business+Sectors+to+Reopen+or+Expand+this+Friday-June+12.pdf</a>                                                                                                                                                                                                                                                             |
| Lake   | 18-Jun-20 | <a href="https://www.cdph.ca.gov/Programs/CID/DCDC/CDPH%20Document%20Library/COVID-19/Guidance-for-Face-Coverings_06-18-2020.pdf">https://www.cdph.ca.gov/Programs/CID/DCDC/CDPH%20Document%20Library/COVID-19/Guidance-for-Face-Coverings_06-18-2020.pdf</a>                                                                                                                                                                                                                                                                                                                         |
| Lake   | 18-Jun-20 | <a href="http://health.co.lake.ca.us/Assets/Departments/Health/Public+Health+Division/COVID-19/Update061820.pdf">http://health.co.lake.ca.us/Assets/Departments/Health/Public+Health+Division/COVID-19/Update061820.pdf</a>                                                                                                                                                                                                                                                                                                                                                           |
| Lake   | 1-Jul-20  | <a href="http://health.co.lake.ca.us/Assets/Departments/Health/Public+Health+Division/Press+Releases/2020/2020-07-01+coronavirus+update.pdf">http://health.co.lake.ca.us/Assets/Departments/Health/Public+Health+Division/Press+Releases/2020/2020-07-01+coronavirus+update.pdf</a>                                                                                                                                                                                                                                                                                                   |
| Lake   | 13-Jul-20 | <a href="https://www.latimes.com/california/story/2020-07-13/newsom-california-county-rollback-reopening-coronavirus">https://www.latimes.com/california/story/2020-07-13/newsom-california-county-rollback-reopening-coronavirus</a>                                                                                                                                                                                                                                                                                                                                                 |
| Lake   | 28-Aug-20 | <a href="https://projects.sfchronicle.com/2020/coronavirus-map/california-reopening/">https://projects.sfchronicle.com/2020/coronavirus-map/california-reopening/</a>                                                                                                                                                                                                                                                                                                                                                                                                                 |
| Lake   | 8-Oct-20  | <a href="http://health.co.lake.ca.us/Assets/Departments/Health/Public+Health+Division/COVID-19/Order+No+C20-07.pdf">http://health.co.lake.ca.us/Assets/Departments/Health/Public+Health+Division/COVID-19/Order+No+C20-07.pdf</a>                                                                                                                                                                                                                                                                                                                                                     |
| Lake   | 9-Oct-20  | <a href="https://wp.sbcounty.gov/cao/countywire/?p=9160#:~:text=Private%20outdoor%20gatherings%20of%20three%20households%20now%20allowed%20throughout%20the%20county%2C%20state,-Published%20October%209&amp;text=Private%20outdoor%20gatherings%20of%20people,Gavin%20Newsom%20on%20Friday.">https://wp.sbcounty.gov/cao/countywire/?p=9160#:~:text=Private%20outdoor%20gatherings%20of%20three%20households%20now%20allowed%20throughout%20the%20county%2C%20state,-Published%20October%209&amp;text=Private%20outdoor%20gatherings%20of%20people,Gavin%20Newsom%20on%20Friday.</a> |
| Lake   | 13-Nov-20 | <a href="https://www.cdph.ca.gov/Programs/CID/DCDC/Pages/COVID-19/Guidance-for-the-Prevention-of-COVID-19-Transmission-for-Gatherings-November-2020.aspx">https://www.cdph.ca.gov/Programs/CID/DCDC/Pages/COVID-19/Guidance-for-the-Prevention-of-COVID-19-Transmission-for-Gatherings-November-2020.aspx</a>                                                                                                                                                                                                                                                                         |
| Lake   | 16-Nov-20 | <a href="https://www.cdph.ca.gov/Programs/CID/DCDC/Pages/COVID-19/guidance-for-face-coverings.aspx">https://www.cdph.ca.gov/Programs/CID/DCDC/Pages/COVID-19/guidance-for-face-coverings.aspx</a>                                                                                                                                                                                                                                                                                                                                                                                     |
| Lake   | 28-Nov-20 | <a href="https://www.lakeconews.com/news/67432-state-moves-lake-county-into-most-restricted-covid-19-tier-local-hospitalizations-increase">https://www.lakeconews.com/news/67432-state-moves-lake-county-into-most-restricted-covid-19-tier-local-hospitalizations-increase</a>                                                                                                                                                                                                                                                                                                       |
| Lassen | 16-Mar-20 | <a href="https://www.lassennews.com/lassen-county-schools-to-close-over-covid-19-concerns/">https://www.lassennews.com/lassen-county-schools-to-close-over-covid-19-concerns/</a>                                                                                                                                                                                                                                                                                                                                                                                                     |
| Lassen | 19-Mar-20 | <a href="https://www.lassennews.com/governor-orders-california-residents-to-stay-home-stop-spread/">https://www.lassennews.com/governor-orders-california-residents-to-stay-home-stop-spread/</a>                                                                                                                                                                                                                                                                                                                                                                                     |
| Lassen | 20-Mar-20 | <a href="https://img1.wsimg.com/blobby/go/8d6d4276-21d3-45f9-8f79-a3d8db78ca1e/downloads/PHDeclaration.pdf?ver=1584896778031">https://img1.wsimg.com/blobby/go/8d6d4276-21d3-45f9-8f79-a3d8db78ca1e/downloads/PHDeclaration.pdf?ver=1584896778031</a>                                                                                                                                                                                                                                                                                                                                 |
| Lassen | 7-Apr-20  | <a href="https://img1.wsimg.com/blobby/go/8d6d4276-21d3-45f9-8f79-a3d8db78ca1e/downloads/Health%20Officer%20guidance%20on%20face%20covering.pdf?ver=1586386451973">https://img1.wsimg.com/blobby/go/8d6d4276-21d3-45f9-8f79-a3d8db78ca1e/downloads/Health%20Officer%20guidance%20on%20face%20covering.pdf?ver=1586386451973</a>                                                                                                                                                                                                                                                       |
| Lassen | 9-Apr-20  | <a href="https://img1.wsimg.com/blobby/go/8d6d4276-21d3-45f9-8f79-a3d8db78ca1e/downloads/Health%20Officer%20Quarantine%20Order%204.7.2020.pdf?ver=1586386451973">https://img1.wsimg.com/blobby/go/8d6d4276-21d3-45f9-8f79-a3d8db78ca1e/downloads/Health%20Officer%20Quarantine%20Order%204.7.2020.pdf?ver=1586386451973</a>                                                                                                                                                                                                                                                           |
| Lassen | 9-Apr-20  | <a href="https://img1.wsimg.com/blobby/go/8d6d4276-21d3-45f9-8f79-a3d8db78ca1e/downloads/Isolation%20Order%20April%207%2C%202020.pdf?ver=1586386451973">https://img1.wsimg.com/blobby/go/8d6d4276-21d3-45f9-8f79-a3d8db78ca1e/downloads/Isolation%20Order%20April%207%2C%202020.pdf?ver=1586386451973</a>                                                                                                                                                                                                                                                                             |
| Lassen | 8-May-20  | <a href="https://www.latimes.com/california/story/2020-05-08/these-are-the-california-businesses-that-can-reopen-and-these-are-the-rules">https://www.latimes.com/california/story/2020-05-08/these-are-the-california-businesses-that-can-reopen-and-these-are-the-rules</a>                                                                                                                                                                                                                                                                                                         |
| Lassen | 12-May-20 | <a href="https://www.bizjournals.com/sacramento/news/2020/05/12/placer-county-approved-to-further-reopen.html">https://www.bizjournals.com/sacramento/news/2020/05/12/placer-county-approved-to-further-reopen.html</a>                                                                                                                                                                                                                                                                                                                                                               |
| Lassen | 26-May-20 | <a href="https://www.manatt.com/Manatt/media/Media/PDF/Health-Officers-Order-Retracting-the-Lassen-1.pdf">https://www.manatt.com/Manatt/media/Media/PDF/Health-Officers-Order-Retracting-the-Lassen-1.pdf</a>                                                                                                                                                                                                                                                                                                                                                                         |
| Lassen | 26-May-20 | <a href="https://www.actionnewsnow.com/content/news/California-allows-some-reopening-of-barbershops-hair-salons-570775791.html">https://www.actionnewsnow.com/content/news/California-allows-some-reopening-of-barbershops-hair-salons-570775791.html</a>                                                                                                                                                                                                                                                                                                                             |
| Lassen | 28-May-20 | <a href="https://www.lassennews.com/korver-terminates-local-health-order-allows-county-to-return-to-phase-2b/">https://www.lassennews.com/korver-terminates-local-health-order-allows-county-to-return-to-phase-2b/</a>                                                                                                                                                                                                                                                                                                                                                               |
| Lassen | 5-Jun-20  | <a href="https://sacramento.cbslocal.com/2020/06/05/california-reopen-gyms-sports-bars-daycamp/">https://sacramento.cbslocal.com/2020/06/05/california-reopen-gyms-sports-bars-daycamp/</a>                                                                                                                                                                                                                                                                                                                                                                                           |
| Lassen | 13-Jun-20 | <a href="https://apnews.com/e0b91103b33f3896c89d0845f5b7bcf#:~:text=SACRAMENTO%2C%20Calif.,new%20state%20guidance%20issued%20Friday.">https://apnews.com/e0b91103b33f3896c89d0845f5b7bcf#:~:text=SACRAMENTO%2C%20Calif.,new%20state%20guidance%20issued%20Friday.</a>                                                                                                                                                                                                                                                                                                                 |

|             |           |                                                                                                                                                                                                                                                                                                                                                                                                                                                                                                                                                                                       |
|-------------|-----------|---------------------------------------------------------------------------------------------------------------------------------------------------------------------------------------------------------------------------------------------------------------------------------------------------------------------------------------------------------------------------------------------------------------------------------------------------------------------------------------------------------------------------------------------------------------------------------------|
| Lassen      | 18-Jun-20 | <a href="https://www.cdph.ca.gov/Programs/CID/DCDC/CDPH%20Document%20Library/COVID-19/Guidance-for-Face-Coverings_06-18-2020.pdf">https://www.cdph.ca.gov/Programs/CID/DCDC/CDPH%20Document%20Library/COVID-19/Guidance-for-Face-Coverings_06-18-2020.pdf</a>                                                                                                                                                                                                                                                                                                                         |
| Lassen      | 30-Jun-20 | <a href="https://lassencares.org/local-press-releases">https://lassencares.org/local-press-releases</a>                                                                                                                                                                                                                                                                                                                                                                                                                                                                               |
| Lassen      | 13-Jul-20 | <a href="https://www.lassennews.com/governor-orders-the-closing-of-some-indoor-business-operations-statewide/">https://www.lassennews.com/governor-orders-the-closing-of-some-indoor-business-operations-statewide/</a>                                                                                                                                                                                                                                                                                                                                                               |
| Lassen      | 28-Aug-20 | <a href="https://projects.sfchronicle.com/2020/coronavirus-map/california-reopening/">https://projects.sfchronicle.com/2020/coronavirus-map/california-reopening/</a>                                                                                                                                                                                                                                                                                                                                                                                                                 |
| Lassen      | 22-Sep-20 | <a href="https://projects.sfchronicle.com/2020/coronavirus-map/california-reopening/">https://projects.sfchronicle.com/2020/coronavirus-map/california-reopening/</a>                                                                                                                                                                                                                                                                                                                                                                                                                 |
| Lassen      | 9-Oct-20  | <a href="https://wp.sbcounty.gov/cao/countywire/?p=9160#:~:text=Private%20outdoor%20gatherings%20of%20three%20households%20now%20allowed%20throughout%20the%20county%2C%20state,-Published%20October%209&amp;text=Private%20outdoor%20gatherings%20of%20people,Gavin%20Newsom%20on%20Friday.">https://wp.sbcounty.gov/cao/countywire/?p=9160#:~:text=Private%20outdoor%20gatherings%20of%20three%20households%20now%20allowed%20throughout%20the%20county%2C%20state,-Published%20October%209&amp;text=Private%20outdoor%20gatherings%20of%20people,Gavin%20Newsom%20on%20Friday.</a> |
| Lassen      | 13-Nov-20 | <a href="https://www.cdph.ca.gov/Programs/CID/DCDC/Pages/COVID-19/Guidance-for-the-Prevention-of-COVID-19-Transmission-for-Gatherings-November-2020.aspx">https://www.cdph.ca.gov/Programs/CID/DCDC/Pages/COVID-19/Guidance-for-the-Prevention-of-COVID-19-Transmission-for-Gatherings-November-2020.aspx</a>                                                                                                                                                                                                                                                                         |
| Lassen      | 16-Nov-20 | <a href="https://www.cdph.ca.gov/Programs/CID/DCDC/Pages/COVID-19/guidance-for-face-coverings.aspx">https://www.cdph.ca.gov/Programs/CID/DCDC/Pages/COVID-19/guidance-for-face-coverings.aspx</a>                                                                                                                                                                                                                                                                                                                                                                                     |
| Lassen      | 24-Nov-20 | <a href="https://www.kcra.com/article/california-covid-tiers-update-nov-24/34774234">https://www.kcra.com/article/california-covid-tiers-update-nov-24/34774234</a>                                                                                                                                                                                                                                                                                                                                                                                                                   |
| Los Angeles | 4-Mar-20  | <a href="https://clkrep.lacity.org/onlinedocs/2020/20-0291_reso_03-04-2020.pdf">https://clkrep.lacity.org/onlinedocs/2020/20-0291_reso_03-04-2020.pdf</a>                                                                                                                                                                                                                                                                                                                                                                                                                             |
| Los Angeles | 4-Mar-20  | <a href="https://dcba.lacounty.gov/noevictions/#:~:text=The%20Los%20Angeles%20County%20Temporary,inclusing%20mobile%20home%20space%20renters.&amp;text=The%20moratorium%20may%20be%20extended,month%2Dto%2Dmonth%20basis.">https://dcba.lacounty.gov/noevictions/#:~:text=The%20Los%20Angeles%20County%20Temporary,inclusing%20mobile%20home%20space%20renters.&amp;text=The%20moratorium%20may%20be%20extended,month%2Dto%2Dmonth%20basis.</a>                                                                                                                                       |
| Los Angeles | 15-Mar-20 | <a href="http://publichealth.lacounty.gov/phcommon/public/media/mediapubHPdetail.cfm?cur=cur&amp;prid=2267&amp;row=25&amp;start=251">http://publichealth.lacounty.gov/phcommon/public/media/mediapubHPdetail.cfm?cur=cur&amp;prid=2267&amp;row=25&amp;start=251</a>                                                                                                                                                                                                                                                                                                                   |
| Los Angeles | 16-Mar-20 | <a href="https://www.weho.org/home/showdocument?id=44008">https://www.weho.org/home/showdocument?id=44008</a>                                                                                                                                                                                                                                                                                                                                                                                                                                                                         |
| Los Angeles | 19-Mar-20 | <a href="https://www.gov.ca.gov/wp-content/uploads/2020/03/3.19.20-attested-EO-N-33-20-COVID-19-HEALTH-ORDER.pdf">https://www.gov.ca.gov/wp-content/uploads/2020/03/3.19.20-attested-EO-N-33-20-COVID-19-HEALTH-ORDER.pdf</a>                                                                                                                                                                                                                                                                                                                                                         |
| Los Angeles | 19-Mar-20 | <a href="http://file.lacounty.gov/SDSInter/lac/1070029_COVID-19_SaferAtHome_HealthOfficerOrder_20200319_Signed.pdf">http://file.lacounty.gov/SDSInter/lac/1070029_COVID-19_SaferAtHome_HealthOfficerOrder_20200319_Signed.pdf</a>                                                                                                                                                                                                                                                                                                                                                     |
| Los Angeles | 21-Mar-20 | <a href="https://web.archive.org/web/20200322155714/http://publichealth.lacounty.gov/media/Coronavirus/COVID-19_March%2021-HOOrder-7_00_FINAL2.pdf">https://web.archive.org/web/20200322155714/http://publichealth.lacounty.gov/media/Coronavirus/COVID-19_March%2021-HOOrder-7_00_FINAL2.pdf</a>                                                                                                                                                                                                                                                                                     |
| Los Angeles | 25-Mar-20 | <a href="https://web.archive.org/web/20200329131315/http://www.publichealth.lacounty.gov/media/Coronavirus/HOO_Coronavirus_BlanketIsolation_03.25.20.pdf">https://web.archive.org/web/20200329131315/http://www.publichealth.lacounty.gov/media/Coronavirus/HOO_Coronavirus_BlanketIsolation_03.25.20.pdf</a>                                                                                                                                                                                                                                                                         |
| Los Angeles | 25-Mar-20 | <a href="https://web.archive.org/web/20200329131248/http://www.publichealth.lacounty.gov/media/Coronavirus/HOO_Coronavirus_Blanket_Quarantine_03.25.20.pdf">https://web.archive.org/web/20200329131248/http://www.publichealth.lacounty.gov/media/Coronavirus/HOO_Coronavirus_Blanket_Quarantine_03.25.20.pdf</a>                                                                                                                                                                                                                                                                     |
| Los Angeles | 27-Mar-20 | <a href="https://web.archive.org/web/20200329131230/http://www.publichealth.lacounty.gov/media/Coronavirus/HOO_BeachesandTrails_3.27.20_FINAL.pdf">https://web.archive.org/web/20200329131230/http://www.publichealth.lacounty.gov/media/Coronavirus/HOO_BeachesandTrails_3.27.20_FINAL.pdf</a>                                                                                                                                                                                                                                                                                       |
| Los Angeles | 31-Mar-20 | <a href="http://publichealth.lacounty.gov/phcommon/public/media/mediapubhpdetail.cfm?prid=2290">http://publichealth.lacounty.gov/phcommon/public/media/mediapubhpdetail.cfm?prid=2290</a>                                                                                                                                                                                                                                                                                                                                                                                             |
| Los Angeles | 5-Apr-20  | <a href="http://publichealth.lacounty.gov/phcommon/public/media/mediapubHPdetail.cfm?cur=cur&amp;prid=2298&amp;row=25&amp;start=226">http://publichealth.lacounty.gov/phcommon/public/media/mediapubHPdetail.cfm?cur=cur&amp;prid=2298&amp;row=25&amp;start=226</a>                                                                                                                                                                                                                                                                                                                   |
| Los Angeles | 10-Apr-20 | <a href="https://web.archive.org/web/20200417205027/http://publichealth.lacounty.gov/media/Coronavirus/HOO_Safer_at_Home_Order_for_Control_of_COVID_04102020.pdf">https://web.archive.org/web/20200417205027/http://publichealth.lacounty.gov/media/Coronavirus/HOO_Safer_at_Home_Order_for_Control_of_COVID_04102020.pdf</a>                                                                                                                                                                                                                                                         |
| Los Angeles | 24-Apr-20 | <a href="https://web.archive.org/web/20200430163648/http://publichealth.lacounty.gov/media/Coronavirus/docs/HOO/HOO_Coronavirus_LicensedFacilities_04.24.20.pdf">https://web.archive.org/web/20200430163648/http://publichealth.lacounty.gov/media/Coronavirus/docs/HOO/HOO_Coronavirus_LicensedFacilities_04.24.20.pdf</a>                                                                                                                                                                                                                                                           |
| Los Angeles | 3-May-20  | <a href="http://www.publichealth.lacounty.gov/phcommon/public/media/mediapubhpdetail.cfm?prid=2356">http://www.publichealth.lacounty.gov/phcommon/public/media/mediapubhpdetail.cfm?prid=2356</a>                                                                                                                                                                                                                                                                                                                                                                                     |
| Los Angeles | 7-May-20  | <a href="http://publichealth.lacounty.gov/phcommon/public/media/mediapubhpdetail.cfm?prid=2362">http://publichealth.lacounty.gov/phcommon/public/media/mediapubhpdetail.cfm?prid=2362</a>                                                                                                                                                                                                                                                                                                                                                                                             |
| Los Angeles | 13-May-20 | <a href="https://web.archive.org/web/20200515160939/http://publichealth.lacounty.gov/media/Coronavirus/docs/HOO/HOO_Safer_at_Home_Order_for_Control_of_COVID_20200513.pdf">https://web.archive.org/web/20200515160939/http://publichealth.lacounty.gov/media/Coronavirus/docs/HOO/HOO_Safer_at_Home_Order_for_Control_of_COVID_20200513.pdf</a>                                                                                                                                                                                                                                       |
| Los Angeles | 22-May-20 | <a href="https://web.archive.org/web/20200523002426/http://publichealth.lacounty.gov/media/coronavirus/docs/HOO/HOO_Order_20200522_Final.pdf">https://web.archive.org/web/20200523002426/http://publichealth.lacounty.gov/media/coronavirus/docs/HOO/HOO_Order_20200522_Final.pdf</a>                                                                                                                                                                                                                                                                                                 |

|             |           |                                                                                                                                                                                                                                                                                                                                                                                                                             |
|-------------|-----------|-----------------------------------------------------------------------------------------------------------------------------------------------------------------------------------------------------------------------------------------------------------------------------------------------------------------------------------------------------------------------------------------------------------------------------|
| Los Angeles | 26-May-20 | <a href="https://web.archive.org/web/20200529162345/http://publichealth.lacounty.gov/media/Coronavirus/docs/HOO/HO_Order_Reopening_Safer_at_Work_and_in_the_Community_05262020_FINAL.pdf">https://web.archive.org/web/20200529162345/http://publichealth.lacounty.gov/media/Coronavirus/docs/HOO/HO_Order_Reopening_Safer_at_Work_and_in_the_Community_05262020_FINAL.pdf</a>                                               |
| Los Angeles | 29-May-20 | <a href="https://web.archive.org/web/20200605194811/http://publichealth.lacounty.gov/media/Coronavirus/docs/HOO/HO_Order_COVID-19_Safer_at_Work_and_in_the_Community_05292020_FINAL_WithAppendices.pdf">https://web.archive.org/web/20200605194811/http://publichealth.lacounty.gov/media/Coronavirus/docs/HOO/HO_Order_COVID-19_Safer_at_Work_and_in_the_Community_05292020_FINAL_WithAppendices.pdf</a>                   |
| Los Angeles | 1-Jun-20  | <a href="http://publichealth.lacounty.gov/acd/docs/COVHomeQuarantine.pdf">http://publichealth.lacounty.gov/acd/docs/COVHomeQuarantine.pdf</a>                                                                                                                                                                                                                                                                               |
| Los Angeles | 11-Jun-20 | <a href="https://web.archive.org/web/20200612162345/http://publichealth.lacounty.gov/media/Coronavirus/docs/HOO/HO_Order_COVID-19_Safer_at_Work_and_in_the_Community_-_Phase%203_06112020_WITH%20APPENDICES.pdf">https://web.archive.org/web/20200612162345/http://publichealth.lacounty.gov/media/Coronavirus/docs/HOO/HO_Order_COVID-19_Safer_at_Work_and_in_the_Community_-_Phase%203_06112020_WITH%20APPENDICES.pdf</a> |
| Los Angeles | 18-Jun-20 | <a href="https://web.archive.org/web/20200619165546/http://publichealth.lacounty.gov/media/Coronavirus/docs/HOO/HOO_COVID-19_Safer_at_Work_and_in_the_Community-Phase%203_06182020_WITH_APPENDICES.pdf">https://web.archive.org/web/20200619165546/http://publichealth.lacounty.gov/media/Coronavirus/docs/HOO/HOO_COVID-19_Safer_at_Work_and_in_the_Community-Phase%203_06182020_WITH_APPENDICES.pdf</a>                   |
| Los Angeles | 18-Jun-20 | <a href="https://www.cdph.ca.gov/Programs/CID/DCDC/CDPH%20Document%20Library/COVID-19/Guidance-for-Face-Coverings_06-18-2020.pdf">https://www.cdph.ca.gov/Programs/CID/DCDC/CDPH%20Document%20Library/COVID-19/Guidance-for-Face-Coverings_06-18-2020.pdf</a>                                                                                                                                                               |
| Los Angeles | 28-Jun-20 | <a href="http://publichealth.lacounty.gov/phcommon/public/media/mediapubhpdetail.cfm?prid=2471">http://publichealth.lacounty.gov/phcommon/public/media/mediapubhpdetail.cfm?prid=2471</a>                                                                                                                                                                                                                                   |
| Los Angeles | 29-Jun-20 | <a href="https://web.archive.org/web/20200702042345/http://publichealth.lacounty.gov/media/Coronavirus/docs/HOO/HO%20Order_Beaches%20and%20Fireworks_06292020.pdf">https://web.archive.org/web/20200702042345/http://publichealth.lacounty.gov/media/Coronavirus/docs/HOO/HO%20Order_Beaches%20and%20Fireworks_06292020.pdf</a>                                                                                             |
| Los Angeles | 1-Jul-20  | <a href="http://publichealth.lacounty.gov/phcommon/public/media/mediapubhpdetail.cfm?prid=2477">http://publichealth.lacounty.gov/phcommon/public/media/mediapubhpdetail.cfm?prid=2477</a>                                                                                                                                                                                                                                   |
| Los Angeles | 8-Jul-20  | <a href="https://web.archive.org/web/20200715155211/http://publichealth.lacounty.gov/media/coronavirus/docs/HOO/HOO_DiagnosticTesting_HealthcareFacilities.pdf">https://web.archive.org/web/20200715155211/http://publichealth.lacounty.gov/media/coronavirus/docs/HOO/HOO_DiagnosticTesting_HealthcareFacilities.pdf</a>                                                                                                   |
| Los Angeles | 13-Jul-20 | <a href="https://www.latimes.com/california/story/2020-07-13/newsom-california-county-rollback-reopening-coronavirus">https://www.latimes.com/california/story/2020-07-13/newsom-california-county-rollback-reopening-coronavirus</a>                                                                                                                                                                                       |
| Los Angeles | 13-Jul-20 | <a href="http://publichealth.lacounty.gov/phcommon/public/media/mediapubdetail.cfm?unit=media&amp;ou=ph&amp;prog=media&amp;cur=cur&amp;prid=2503&amp;row=25&amp;start=26">http://publichealth.lacounty.gov/phcommon/public/media/mediapubdetail.cfm?unit=media&amp;ou=ph&amp;prog=media&amp;cur=cur&amp;prid=2503&amp;row=25&amp;start=26</a>                                                                               |
| Los Angeles | 17-Jul-20 | <a href="https://www.cdph.ca.gov/Programs/CID/DCDC/CDPH%20Document%20Library/COVID-19/Schools%20Reopening%20Recommendations.pdf">https://www.cdph.ca.gov/Programs/CID/DCDC/CDPH%20Document%20Library/COVID-19/Schools%20Reopening%20Recommendations.pdf</a>                                                                                                                                                                 |
| Los Angeles | 18-Jul-20 | <a href="https://web.archive.org/web/20200719230526/http://publichealth.lacounty.gov/media/Coronavirus/docs/HOO/2020_07_18_HOO_SaferAtHome_Schools.pdf">https://web.archive.org/web/20200719230526/http://publichealth.lacounty.gov/media/Coronavirus/docs/HOO/2020_07_18_HOO_SaferAtHome_Schools.pdf</a>                                                                                                                   |
| Los Angeles | 20-Jul-20 | <a href="http://publichealth.lacounty.gov/phcommon/public/media/mediapubHPdetail.cfm?cur=cur&amp;prid=2521&amp;row=25&amp;start=1">http://publichealth.lacounty.gov/phcommon/public/media/mediapubHPdetail.cfm?cur=cur&amp;prid=2521&amp;row=25&amp;start=1</a>                                                                                                                                                             |
| Los Angeles | 23-Jul-20 | <a href="http://publichealth.lacounty.gov/media/Coronavirus/docs/HOO/HOO_Coronavirus_Blanket_Quarantine.pdf">http://publichealth.lacounty.gov/media/Coronavirus/docs/HOO/HOO_Coronavirus_Blanket_Quarantine.pdf</a>                                                                                                                                                                                                         |
| Los Angeles | 12-Aug-20 | <a href="http://publichealth.lacounty.gov/media/Coronavirus/docs/HOO/2020.08.12_HOO_Safer%20at%20Home_Higher%20Ed.pdf">http://publichealth.lacounty.gov/media/Coronavirus/docs/HOO/2020.08.12_HOO_Safer%20at%20Home_Higher%20Ed.pdf</a>                                                                                                                                                                                     |
| Los Angeles | 28-Aug-20 | <a href="https://www.cdph.ca.gov/Programs/CID/DCDC/CDPH%20Document%20Library/COVID-19/8-28-20_Order-Plan-Reducing-COVID19-Adjusting-Permitted-Sectors-Signed.pdf">https://www.cdph.ca.gov/Programs/CID/DCDC/CDPH%20Document%20Library/COVID-19/8-28-20_Order-Plan-Reducing-COVID19-Adjusting-Permitted-Sectors-Signed.pdf</a>                                                                                               |
| Los Angeles | 2-Sep-20  | <a href="https://web.archive.org/web/20200917040743if_/http://www.publichealth.lacounty.gov/media/Coronavirus/docs/HOO/FAQ-SaferatWorkandCommunityOrder.pdf">https://web.archive.org/web/20200917040743if_/http://www.publichealth.lacounty.gov/media/Coronavirus/docs/HOO/FAQ-SaferatWorkandCommunityOrder.pdf</a>                                                                                                         |
| Los Angeles | 14-Sep-20 | <a href="http://publichealth.lacounty.gov/media/Coronavirus/docs/HOO/2020_09_04_HOO_Safer_at_Home.pdf">http://publichealth.lacounty.gov/media/Coronavirus/docs/HOO/2020_09_04_HOO_Safer_at_Home.pdf</a>                                                                                                                                                                                                                     |
| Los Angeles | 22-Sep-20 | <a href="https://files.covid19.ca.gov/pdf/guidance-expanded-personal-care-services--en.pdf">https://files.covid19.ca.gov/pdf/guidance-expanded-personal-care-services--en.pdf</a>                                                                                                                                                                                                                                           |
| Los Angeles | 1-Oct-20  | <a href="http://publichealth.lacounty.gov/phcommon/public/media/mediapubhpdetail.cfm?prid=2719">http://publichealth.lacounty.gov/phcommon/public/media/mediapubhpdetail.cfm?prid=2719</a>                                                                                                                                                                                                                                   |
| Los Angeles | 5-Oct-20  | <a href="http://publichealth.lacounty.gov/media/Coronavirus/docs/HOO/HOO_CommunityCareFacilities.pdf">http://publichealth.lacounty.gov/media/Coronavirus/docs/HOO/HOO_CommunityCareFacilities.pdf</a>                                                                                                                                                                                                                       |
| Los Angeles | 5-Oct-20  | <a href="http://publichealth.lacounty.gov/phcommon/public/media/mediapubhpdetail.cfm?prid=2719">http://publichealth.lacounty.gov/phcommon/public/media/mediapubhpdetail.cfm?prid=2719</a>                                                                                                                                                                                                                                   |
| Los Angeles | 5-Oct-20  | <a href="http://publichealth.lacounty.gov/media/Coronavirus/docs/HOO/HOO_SkilledNursingFacilities.pdf">http://publichealth.lacounty.gov/media/Coronavirus/docs/HOO/HOO_SkilledNursingFacilities.pdf</a>                                                                                                                                                                                                                     |
| Los Angeles | 7-Oct-20  | <a href="http://publichealth.lacounty.gov/phcommon/public/media/mediapubhpdetail.cfm?prid=2719">http://publichealth.lacounty.gov/phcommon/public/media/mediapubhpdetail.cfm?prid=2719</a>                                                                                                                                                                                                                                   |

|             |           |                                                                                                                                                                                                                                                                 |
|-------------|-----------|-----------------------------------------------------------------------------------------------------------------------------------------------------------------------------------------------------------------------------------------------------------------|
| Los Angeles | 14-Oct-20 | <a href="http://publichealth.lacounty.gov/media/Coronavirus/docs/HOO/2020_10_23_HOO_Safer_at_Home.pdf">http://publichealth.lacounty.gov/media/Coronavirus/docs/HOO/2020_10_23_HOO_Safer_at_Home.pdf</a>                                                         |
| Los Angeles | 23-Oct-20 | <a href="http://publichealth.lacounty.gov/media/Coronavirus/docs/HOO/2020_10_23_HOO_Safer_at_Home.pdf">http://publichealth.lacounty.gov/media/Coronavirus/docs/HOO/2020_10_23_HOO_Safer_at_Home.pdf</a>                                                         |
| Los Angeles | 23-Oct-20 | <a href="http://publichealth.lacounty.gov/media/Coronavirus/docs/HOO/2020_10_23_HOO_Breweries_and_Wineries.pdf">http://publichealth.lacounty.gov/media/Coronavirus/docs/HOO/2020_10_23_HOO_Breweries_and_Wineries.pdf</a>                                       |
| Los Angeles | 13-Nov-20 | <a href="http://publichealth.lacounty.gov/media/Coronavirus/docs/people/GuidanceGatherings.pdf">http://publichealth.lacounty.gov/media/Coronavirus/docs/people/GuidanceGatherings.pdf</a>                                                                       |
| Los Angeles | 19-Nov-20 | <a href="https://www.cdph.ca.gov/Programs/CID/DCDC/Pages/COVID-19/limited-stay-at-home-order.aspx">https://www.cdph.ca.gov/Programs/CID/DCDC/Pages/COVID-19/limited-stay-at-home-order.aspx</a>                                                                 |
| Los Angeles | 25-Nov-20 | <a href="http://publichealth.lacounty.gov/media/Coronavirus/docs/HOO/HOO_SaferatHome_SurgeResponse.pdf">http://publichealth.lacounty.gov/media/Coronavirus/docs/HOO/HOO_SaferatHome_SurgeResponse.pdf</a>                                                       |
| Los Angeles | 27-Nov-20 | <a href="http://www.publichealth.lacounty.gov/phcommon/public/media/mediapubhpdetail.cfm?prid=2830">http://www.publichealth.lacounty.gov/phcommon/public/media/mediapubhpdetail.cfm?prid=2830</a>                                                               |
| Los Angeles | 5-Dec-20  | <a href="https://www.gov.ca.gov/wp-content/uploads/2020/12/12.3.20-Stay-at-Home-Order-ICU-Scenario.pdf">https://www.gov.ca.gov/wp-content/uploads/2020/12/12.3.20-Stay-at-Home-Order-ICU-Scenario.pdf</a>                                                       |
| Los Angeles | 30-Dec-20 | <a href="http://publichealth.lacounty.gov/media/Coronavirus/docs/HOO/HOO_SaferatHome_SurgeResponse.pdf">http://publichealth.lacounty.gov/media/Coronavirus/docs/HOO/HOO_SaferatHome_SurgeResponse.pdf</a>                                                       |
| Madera      | 16-Mar-20 | <a href="https://www.yourcentralvalley.com/life-health/health/coronavirus/madera-county-declares-local-health-emergency/">https://www.yourcentralvalley.com/life-health/health/coronavirus/madera-county-declares-local-health-emergency/</a>                   |
| Madera      | 19-Mar-20 | <a href="https://www.maderacounty.com/home/showdocument?id=20276">https://www.maderacounty.com/home/showdocument?id=20276</a>                                                                                                                                   |
| Madera      | 19-Mar-20 | <a href="https://www.gov.ca.gov/wp-content/uploads/2020/03/3.19.20-attested-EO-N-33-20-COVID-19-HEALTH-ORDER.pdf">https://www.gov.ca.gov/wp-content/uploads/2020/03/3.19.20-attested-EO-N-33-20-COVID-19-HEALTH-ORDER.pdf</a>                                   |
| Madera      | 19-Mar-20 | <a href="https://web.archive.org/web/20200407015126/https://www.maderacounty.com/home/showdocument?id=20430">https://web.archive.org/web/20200407015126/https://www.maderacounty.com/home/showdocument?id=20430</a>                                             |
| Madera      | 9-Apr-20  | <a href="https://web.archive.org/web/20200513075304/https://www.maderacounty.com/Home/ShowDocument?id=20534">https://web.archive.org/web/20200513075304/https://www.maderacounty.com/Home/ShowDocument?id=20534</a>                                             |
| Madera      | 14-Apr-20 | <a href="https://web.archive.org/web/20200613111921/https://www.maderacounty.com/home/showdocument?id=20664">https://web.archive.org/web/20200613111921/https://www.maderacounty.com/home/showdocument?id=20664</a>                                             |
| Madera      | 5-May-20  | <a href="https://calmatters.org/newsletters/whatmatters/2020/05/coronavirus-when-will-california-open-business-retail-restaurant/">https://calmatters.org/newsletters/whatmatters/2020/05/coronavirus-when-will-california-open-business-retail-restaurant/</a> |
| Madera      | 20-May-20 | <a href="https://www.maderacounty.com/home/showdocument?id=21036">https://www.maderacounty.com/home/showdocument?id=21036</a>                                                                                                                                   |
| Madera      | 27-May-20 | <a href="https://www.maderacounty.com/home/showdocument?id=21127">https://www.maderacounty.com/home/showdocument?id=21127</a>                                                                                                                                   |
| Madera      | 1-Jun-20  | <a href="https://web.archive.org/web/20200708075834/https://www.maderacounty.com/home/showdocument?id=21095">https://web.archive.org/web/20200708075834/https://www.maderacounty.com/home/showdocument?id=21095</a>                                             |
| Madera      | 5-Jun-20  | <a href="https://web.archive.org/web/20200608181615/https://covid19.ca.gov/pdf/guidance-hair-salons.pdf">https://web.archive.org/web/20200608181615/https://covid19.ca.gov/pdf/guidance-hair-salons.pdf</a>                                                     |
| Madera      | 12-Jun-20 | <a href="https://www.yourcentralvalley.com/news/madera-county-enters-stage-3-of-state-reopening-roadmap/">https://www.yourcentralvalley.com/news/madera-county-enters-stage-3-of-state-reopening-roadmap/</a>                                                   |
| Madera      | 18-Jun-20 | <a href="https://www.cdph.ca.gov/Programs/CID/DCDC/CDPH%20Document%20Library/COVID-19/Guidance-for-Face-Coverings_06-18-2020.pdf">https://www.cdph.ca.gov/Programs/CID/DCDC/CDPH%20Document%20Library/COVID-19/Guidance-for-Face-Coverings_06-18-2020.pdf</a>   |
| Madera      | 19-Jun-20 | <a href="https://www.yourcentralvalley.com/news/madera-county-enters-stage-3-of-state-reopening-roadmap/">https://www.yourcentralvalley.com/news/madera-county-enters-stage-3-of-state-reopening-roadmap/</a>                                                   |
| Madera      | 1-Jul-20  | <a href="https://www.maderacounty.com/home/showdocument?id=21277">https://www.maderacounty.com/home/showdocument?id=21277</a>                                                                                                                                   |
| Madera      | 7-Jul-20  | <a href="https://abc30.com/business-madera-county-closure-coronavirus/6305810/">https://abc30.com/business-madera-county-closure-coronavirus/6305810/</a>                                                                                                       |
| Madera      | 13-Jul-20 | <a href="https://www.maderacounty.com/home/showdocument?id=21490">https://www.maderacounty.com/home/showdocument?id=21490</a>                                                                                                                                   |
| Madera      | 13-Jul-20 | <a href="https://www.latimes.com/california/story/2020-07-13/newsom-california-county-rollback-reopening-coronavirus">https://www.latimes.com/california/story/2020-07-13/newsom-california-county-rollback-reopening-coronavirus</a>                           |

|        |           |                                                                                                                                                                                                                                                                                                                                                                                                                                                                                                                                                                                       |
|--------|-----------|---------------------------------------------------------------------------------------------------------------------------------------------------------------------------------------------------------------------------------------------------------------------------------------------------------------------------------------------------------------------------------------------------------------------------------------------------------------------------------------------------------------------------------------------------------------------------------------|
| Madera | 17-Jul-20 | <a href="https://www.cdph.ca.gov/Programs/CID/DCDC/CDPH%20Document%20Library/COVID-19/Schools%20Reopening%20Recommendations.pdf">https://www.cdph.ca.gov/Programs/CID/DCDC/CDPH%20Document%20Library/COVID-19/Schools%20Reopening%20Recommendations.pdf</a>                                                                                                                                                                                                                                                                                                                           |
| Madera | 28-Aug-20 | <a href="https://abc7news.com/ca-reopneing-phases-covid19cagov-gavin-newsom-update-california-salon-reopening/6393805/">https://abc7news.com/ca-reopneing-phases-covid19cagov-gavin-newsom-update-california-salon-reopening/6393805/</a>                                                                                                                                                                                                                                                                                                                                             |
| Madera | 22-Sep-20 | <a href="https://files.covid19.ca.gov/pdf/guidance-expanded-personal-care-services--en.pdf">https://files.covid19.ca.gov/pdf/guidance-expanded-personal-care-services--en.pdf</a>                                                                                                                                                                                                                                                                                                                                                                                                     |
| Madera | 23-Sep-20 | <a href="https://www.maderacounty.com/home/showdocument?id=22284">https://www.maderacounty.com/home/showdocument?id=22284</a>                                                                                                                                                                                                                                                                                                                                                                                                                                                         |
| Madera | 9-Oct-20  | <a href="https://wp.sbcounty.gov/cao/countywire/?p=9160#:~:text=Private%20outdoor%20gatherings%20of%20three%20households%20now%20allowed%20throughout%20the%20county%2C%20state,-Published%20October%209&amp;text=Private%20outdoor%20gatherings%20of%20people,Gavin%20Newsom%20on%20Friday.">https://wp.sbcounty.gov/cao/countywire/?p=9160#:~:text=Private%20outdoor%20gatherings%20of%20three%20households%20now%20allowed%20throughout%20the%20county%2C%20state,-Published%20October%209&amp;text=Private%20outdoor%20gatherings%20of%20people,Gavin%20Newsom%20on%20Friday.</a> |
| Madera | 16-Nov-20 | <a href="https://www.cdph.ca.gov/Programs/CID/DCDC/Pages/COVID-19/guidance-for-face-coverings.aspx">https://www.cdph.ca.gov/Programs/CID/DCDC/Pages/COVID-19/guidance-for-face-coverings.aspx</a>                                                                                                                                                                                                                                                                                                                                                                                     |
| Madera | 19-Nov-20 | <a href="https://www.cdph.ca.gov/Programs/CID/DCDC/Pages/COVID-19/limited-stay-at-home-order.aspx">https://www.cdph.ca.gov/Programs/CID/DCDC/Pages/COVID-19/limited-stay-at-home-order.aspx</a>                                                                                                                                                                                                                                                                                                                                                                                       |
| Madera | 5-Dec-20  | <a href="https://www.gov.ca.gov/wp-content/uploads/2020/12/12.3.20-Stay-at-Home-Order-ICU-Scenario.pdf">https://www.gov.ca.gov/wp-content/uploads/2020/12/12.3.20-Stay-at-Home-Order-ICU-Scenario.pdf</a>                                                                                                                                                                                                                                                                                                                                                                             |
| Marin  | 3-Mar-20  | <a href="https://www.marincounty.org/-/media/files/maringov/board-actions/2020/march/200310hhslocalhealthemergencycovidltr.pdf?la=en">https://www.marincounty.org/-/media/files/maringov/board-actions/2020/march/200310hhslocalhealthemergencycovidltr.pdf?la=en</a>                                                                                                                                                                                                                                                                                                                 |
| Marin  | 9-Mar-20  | <a href="https://www.marincounty.org/main/county-press-releases/press-releases/2020/hhs-covidgatherings-030920">https://www.marincounty.org/main/county-press-releases/press-releases/2020/hhs-covidgatherings-030920</a>                                                                                                                                                                                                                                                                                                                                                             |
| Marin  | 13-Mar-20 | <a href="https://coronavirus.marinhhs.org/sites/default/files/2020-03/Press%20Release%2020200313%20-%20HHS%20-%20COVID%20School%20Suspension.pdf">https://coronavirus.marinhhs.org/sites/default/files/2020-03/Press%20Release%2020200313%20-%20HHS%20-%20COVID%20School%20Suspension.pdf</a>                                                                                                                                                                                                                                                                                         |
| Marin  | 16-Mar-20 | <a href="https://www.marincounty.org/main/county-press-releases/press-releases/2020/hhs-covid-shelterinplace-031620">https://www.marincounty.org/main/county-press-releases/press-releases/2020/hhs-covid-shelterinplace-031620</a>                                                                                                                                                                                                                                                                                                                                                   |
| Marin  | 19-Mar-20 | <a href="https://www.gov.ca.gov/wp-content/uploads/2020/03/3.19.20-attested-EO-N-33-20-COVID-19-HEALTH-ORDER.pdf">https://www.gov.ca.gov/wp-content/uploads/2020/03/3.19.20-attested-EO-N-33-20-COVID-19-HEALTH-ORDER.pdf</a>                                                                                                                                                                                                                                                                                                                                                         |
| Marin  | 19-Mar-20 | <a href="https://www.marincounty.org/main/county-press-releases/press-releases/2020/cao-covid-tenantprotections-031920">https://www.marincounty.org/main/county-press-releases/press-releases/2020/cao-covid-tenantprotections-031920</a>                                                                                                                                                                                                                                                                                                                                             |
| Marin  | 24-Mar-20 | <a href="https://www.marincounty.org/main/county-press-releases/press-releases/2020/hhs-covid-parksclosure-032220">https://www.marincounty.org/main/county-press-releases/press-releases/2020/hhs-covid-parksclosure-032220</a>                                                                                                                                                                                                                                                                                                                                                       |
| Marin  | 24-Mar-20 | <a href="https://coronavirus.marinhhs.org/sites/default/files/2020-03/orderno-c19-10.pdf">https://coronavirus.marinhhs.org/sites/default/files/2020-03/orderno-c19-10.pdf</a>                                                                                                                                                                                                                                                                                                                                                                                                         |
| Marin  | 25-Mar-20 | <a href="https://patch.com/california/walnutcreek/contra-costa-county-school-closure-extended-through-may-1">https://patch.com/california/walnutcreek/contra-costa-county-school-closure-extended-through-may-1</a>                                                                                                                                                                                                                                                                                                                                                                   |
| Marin  | 31-Mar-20 | <a href="https://coronavirus.marinhhs.org/sites/default/files/2020-04/3.31-updated-parks-closure-order_-002-final-ada-check-accessible_1.pdf">https://coronavirus.marinhhs.org/sites/default/files/2020-04/3.31-updated-parks-closure-order_-002-final-ada-check-accessible_1.pdf</a>                                                                                                                                                                                                                                                                                                 |
| Marin  | 31-Mar-20 | <a href="https://coronavirus.marinhhs.org/sites/default/files/2020-04/marin_final-superseding-shelter-in-place-order-accessible_0.pdf">https://coronavirus.marinhhs.org/sites/default/files/2020-04/marin_final-superseding-shelter-in-place-order-accessible_0.pdf</a>                                                                                                                                                                                                                                                                                                               |
| Marin  | 9-Apr-20  | <a href="https://coronavirus.marinhhs.org/sites/default/files/2020-04/short-term-rental-order2-ls.pdf">https://coronavirus.marinhhs.org/sites/default/files/2020-04/short-term-rental-order2-ls.pdf</a>                                                                                                                                                                                                                                                                                                                                                                               |
| Marin  | 17-Apr-20 | <a href="https://coronavirus.marinhhs.org/marin-public-health-order-face-coverings-41720">https://coronavirus.marinhhs.org/marin-public-health-order-face-coverings-41720</a>                                                                                                                                                                                                                                                                                                                                                                                                         |
| Marin  | 28-Apr-20 | <a href="https://sanfrancisco.cbslocal.com/2020/04/29/marin-county-expands-eviction-protections-coronavirus-covid-19-emergency/">https://sanfrancisco.cbslocal.com/2020/04/29/marin-county-expands-eviction-protections-coronavirus-covid-19-emergency/</a>                                                                                                                                                                                                                                                                                                                           |
| Marin  | 29-Apr-20 | <a href="https://coronavirus.marinhhs.org/executive-summary-may-4-2020-shelter-order">https://coronavirus.marinhhs.org/executive-summary-may-4-2020-shelter-order</a>                                                                                                                                                                                                                                                                                                                                                                                                                 |
| Marin  | 14-May-20 | <a href="https://www.marinij.com/2020/05/18/marin-retail-stores-reopen-amid-new-spike-in-virus-cases/">https://www.marinij.com/2020/05/18/marin-retail-stores-reopen-amid-new-spike-in-virus-cases/</a>                                                                                                                                                                                                                                                                                                                                                                               |
| Marin  | 15-May-20 | <a href="https://coronavirus.marinhhs.org/parks-order-effective-5182020">https://coronavirus.marinhhs.org/parks-order-effective-5182020</a>                                                                                                                                                                                                                                                                                                                                                                                                                                           |
| Marin  | 20-May-20 | <a href="https://coronavirus.marinhhs.org/public-health-emergency-quarantine-order-52020">https://coronavirus.marinhhs.org/public-health-emergency-quarantine-order-52020</a>                                                                                                                                                                                                                                                                                                                                                                                                         |
| Marin  | 20-May-20 | <a href="https://coronavirus.marinhhs.org/public-health-emergency-isolation-order-52020">https://coronavirus.marinhhs.org/public-health-emergency-isolation-order-52020</a>                                                                                                                                                                                                                                                                                                                                                                                                           |
| Marin  | 29-May-20 | <a href="https://www.marincounty.org/main/county-press-releases/press-releases/2020/hhs-covid-reopening-052920">https://www.marincounty.org/main/county-press-releases/press-releases/2020/hhs-covid-reopening-052920</a>                                                                                                                                                                                                                                                                                                                                                             |



|          |           |                                                                                                                                                                                                                                                                                                                                                                                                                                                                                                                                                                                       |
|----------|-----------|---------------------------------------------------------------------------------------------------------------------------------------------------------------------------------------------------------------------------------------------------------------------------------------------------------------------------------------------------------------------------------------------------------------------------------------------------------------------------------------------------------------------------------------------------------------------------------------|
| Marin    | 29-May-20 | <a href="https://coronavirus.marinhhs.org/parks-order-effective-june-1-2020">https://coronavirus.marinhhs.org/parks-order-effective-june-1-2020</a>                                                                                                                                                                                                                                                                                                                                                                                                                                   |
| Marin    | 5-Jun-20  | <a href="https://www.marincounty.org/main/county-press-releases/press-releases/2020/hhs-covid-phase2additions-060520">https://www.marincounty.org/main/county-press-releases/press-releases/2020/hhs-covid-phase2additions-060520</a>                                                                                                                                                                                                                                                                                                                                                 |
| Marin    | 8-Jun-20  | <a href="https://coronavirus.marinhhs.org/covid-19-testing-residents-and-personnel-certain-residential-facilities">https://coronavirus.marinhhs.org/covid-19-testing-residents-and-personnel-certain-residential-facilities</a>                                                                                                                                                                                                                                                                                                                                                       |
| Marin    | 11-Jun-20 | <a href="https://www.marincounty.org/main/county-press-releases/press-releases/2020/hhs-covid-mr-reopeningretail-061120">https://www.marincounty.org/main/county-press-releases/press-releases/2020/hhs-covid-mr-reopeningretail-061120</a>                                                                                                                                                                                                                                                                                                                                           |
| Marin    | 18-Jun-20 | <a href="https://www.cdph.ca.gov/Programs/CID/DCDC/CDPH%20Document%20Library/COVID-19/Guidance-for-Face-Coverings_06-18-2020.pdf">https://www.cdph.ca.gov/Programs/CID/DCDC/CDPH%20Document%20Library/COVID-19/Guidance-for-Face-Coverings_06-18-2020.pdf</a>                                                                                                                                                                                                                                                                                                                         |
| Marin    | 19-Jun-20 | <a href="https://www.marincounty.org/main/county-press-releases/press-releases/2020/hhs-covid-social-bubbles-061920">https://www.marincounty.org/main/county-press-releases/press-releases/2020/hhs-covid-social-bubbles-061920</a>                                                                                                                                                                                                                                                                                                                                                   |
| Marin    | 26-Jun-20 | <a href="https://www.marinij.com/2020/06/29/marin-allows-indoor-dining-haircuts-under-limited-reopening-plan/">https://www.marinij.com/2020/06/29/marin-allows-indoor-dining-haircuts-under-limited-reopening-plan/</a>                                                                                                                                                                                                                                                                                                                                                               |
| Marin    | 28-Jun-20 | <a href="https://www.marincounty.org/main/county-press-releases/press-releases/2020/cda-covid- evictionmoratorium-072820">https://www.marincounty.org/main/county-press-releases/press-releases/2020/cda-covid- evictionmoratorium-072820</a>                                                                                                                                                                                                                                                                                                                                         |
| Marin    | 5-Jul-20  | <a href="https://www.marincounty.org/main/county-press-releases/press-releases/2020/hhs-covid-indoordining-070520">https://www.marincounty.org/main/county-press-releases/press-releases/2020/hhs-covid-indoordining-070520</a>                                                                                                                                                                                                                                                                                                                                                       |
| Marin    | 13-Jul-20 | <a href="https://www.marincounty.org/main/county-press-releases/press-releases/2020/hhs-covid-indoorbusiness-071320">https://www.marincounty.org/main/county-press-releases/press-releases/2020/hhs-covid-indoorbusiness-071320</a>                                                                                                                                                                                                                                                                                                                                                   |
| Marin    | 13-Jul-20 | <a href="https://www.cdph.ca.gov/Programs/OPA/Pages/NR20-158.aspx">https://www.cdph.ca.gov/Programs/OPA/Pages/NR20-158.aspx</a>                                                                                                                                                                                                                                                                                                                                                                                                                                                       |
| Marin    | 17-Jul-20 | <a href="https://www.cdph.ca.gov/Programs/CID/DCDC/CDPH%20Document%20Library/COVID-19/Schools%20Reopening%20Recommendations.pdf">https://www.cdph.ca.gov/Programs/CID/DCDC/CDPH%20Document%20Library/COVID-19/Schools%20Reopening%20Recommendations.pdf</a>                                                                                                                                                                                                                                                                                                                           |
| Marin    | 21-Jul-20 | <a href="https://www.mercurynews.com/2020/07/22/coronavirus-marin-county-votes-to-impose-fines-on-violators-of-public-health-orders/">https://www.mercurynews.com/2020/07/22/coronavirus-marin-county-votes-to-impose-fines-on-violators-of-public-health-orders/</a>                                                                                                                                                                                                                                                                                                                 |
| Marin    | 10-Aug-20 | <a href="https://www.marincounty.org/main/county-press-releases/press-releases/2020/hhs-covid-personalserviceopen-081020">https://www.marincounty.org/main/county-press-releases/press-releases/2020/hhs-covid-personalserviceopen-081020</a>                                                                                                                                                                                                                                                                                                                                         |
| Marin    | 28-Aug-20 | <a href="https://abc7news.com/ca-reopneing-phases-covid19cagov-gavin-newsom-update-california-salon-reopening/6393805/">https://abc7news.com/ca-reopneing-phases-covid19cagov-gavin-newsom-update-california-salon-reopening/6393805/</a>                                                                                                                                                                                                                                                                                                                                             |
| Marin    | 15-Sep-20 | <a href="https://projects.sfchronicle.com/2020/coronavirus-map/california-reopening/">https://projects.sfchronicle.com/2020/coronavirus-map/california-reopening/</a>                                                                                                                                                                                                                                                                                                                                                                                                                 |
| Marin    | 9-Oct-20  | <a href="https://wp.sbcounty.gov/cao/countywire/?p=9160#:~:text=Private%20outdoor%20gatherings%20of%20three%20households%20now%20allowed%20throughout%20the%20county%2C%20state,-Published%20October%209&amp;text=Private%20outdoor%20gatherings%20of%20people,Gavin%20Newsom%20on%20Friday.">https://wp.sbcounty.gov/cao/countywire/?p=9160#:~:text=Private%20outdoor%20gatherings%20of%20three%20households%20now%20allowed%20throughout%20the%20county%2C%20state,-Published%20October%209&amp;text=Private%20outdoor%20gatherings%20of%20people,Gavin%20Newsom%20on%20Friday.</a> |
| Marin    | 27-Oct-20 | <a href="https://coronavirus.marinhhs.org/risk-reduction-order">https://coronavirus.marinhhs.org/risk-reduction-order</a>                                                                                                                                                                                                                                                                                                                                                                                                                                                             |
| Marin    | 27-Oct-20 | <a href="https://projects.sfchronicle.com/2020/coronavirus-map/california-reopening/">https://projects.sfchronicle.com/2020/coronavirus-map/california-reopening/</a>                                                                                                                                                                                                                                                                                                                                                                                                                 |
| Marin    | 13-Nov-20 | <a href="https://www.cdph.ca.gov/Programs/CID/DCDC/Pages/COVID-19/Guidance-for-the-Prevention-of-COVID-19-Transmission-for-Gatherings-November-2020.aspx">https://www.cdph.ca.gov/Programs/CID/DCDC/Pages/COVID-19/Guidance-for-the-Prevention-of-COVID-19-Transmission-for-Gatherings-November-2020.aspx</a>                                                                                                                                                                                                                                                                         |
| Marin    | 17-Nov-20 | <a href="https://kmph.com/news/local/40-california-counties-in-purple-tier-including-the-central-valley">https://kmph.com/news/local/40-california-counties-in-purple-tier-including-the-central-valley</a>                                                                                                                                                                                                                                                                                                                                                                           |
| Marin    | 20-Nov-20 | <a href="https://coronavirus.marinhhs.org/gatherings">https://coronavirus.marinhhs.org/gatherings</a>                                                                                                                                                                                                                                                                                                                                                                                                                                                                                 |
| Marin    | 4-Dec-20  | <a href="https://www.nbcbayarea.com/news/coronavirus/when-will-new-coronavirus-stay-at-home-order-impact-bay-area/2415063/">https://www.nbcbayarea.com/news/coronavirus/when-will-new-coronavirus-stay-at-home-order-impact-bay-area/2415063/</a>                                                                                                                                                                                                                                                                                                                                     |
| Marin    | 5-Dec-20  | <a href="https://coronavirus.marinhhs.org/updated-guidelines-quarantine">https://coronavirus.marinhhs.org/updated-guidelines-quarantine</a>                                                                                                                                                                                                                                                                                                                                                                                                                                           |
| Marin    | 16-Dec-20 | <a href="https://www.gov.ca.gov/wp-content/uploads/2020/12/12.3.20-Stay-at-Home-Order-ICU-Scenario.pdf">https://www.gov.ca.gov/wp-content/uploads/2020/12/12.3.20-Stay-at-Home-Order-ICU-Scenario.pdf</a>                                                                                                                                                                                                                                                                                                                                                                             |
| Mariposa | 13-Mar-20 | <a href="https://www.mariposacounty.org/DocumentCenter/View/82782/Final-Signed_-_Health-Officer-Order-for-Large-Scale-Events-and-Mass-Gatherings-31320_BoS-Attachment">https://www.mariposacounty.org/DocumentCenter/View/82782/Final-Signed_-_Health-Officer-Order-for-Large-Scale-Events-and-Mass-Gatherings-31320_BoS-Attachment</a>                                                                                                                                                                                                                                               |
| Mariposa | 17-Mar-20 | <a href="https://www.mariposacounty.org/DocumentCenter/View/82804/COUNTY_COVID-19_Local_Emergency_Proclamation_Mariposa_17Mar2020">https://www.mariposacounty.org/DocumentCenter/View/82804/COUNTY_COVID-19_Local_Emergency_Proclamation_Mariposa_17Mar2020</a>                                                                                                                                                                                                                                                                                                                       |
| Mariposa | 17-Mar-20 | <a href="https://www.mariposacounty.org/DocumentCenter/View/82814/31720_-_Health-Officer-Order-for-Large-Scale-Events-and-Mass-Gatherings-UPDATE-50">https://www.mariposacounty.org/DocumentCenter/View/82814/31720_-_Health-Officer-Order-for-Large-Scale-Events-and-Mass-Gatherings-UPDATE-50</a>                                                                                                                                                                                                                                                                                   |

|           |           |                                                                                                                                                                                                                                                                                                                                                                                                                                                                                                                                                                                     |
|-----------|-----------|-------------------------------------------------------------------------------------------------------------------------------------------------------------------------------------------------------------------------------------------------------------------------------------------------------------------------------------------------------------------------------------------------------------------------------------------------------------------------------------------------------------------------------------------------------------------------------------|
| Mariposa  | 19-Mar-20 | <a href="https://www.gov.ca.gov/wp-content/uploads/2020/03/3.19.20-attested-EO-N-33-20-COVID-19-HEALTH-ORDER.pdf">https://www.gov.ca.gov/wp-content/uploads/2020/03/3.19.20-attested-EO-N-33-20-COVID-19-HEALTH-ORDER.pdf</a>                                                                                                                                                                                                                                                                                                                                                       |
| Mariposa  | 25-Mar-20 | <a href="http://www.mariposacounty.org/DocumentCenter/View/83924/Public-Health-Officer-Order---Febrile-Respiratory-Illness-32520?bidId=">http://www.mariposacounty.org/DocumentCenter/View/83924/Public-Health-Officer-Order---Febrile-Respiratory-Illness-32520?bidId=</a>                                                                                                                                                                                                                                                                                                         |
| Mariposa  | 3-Apr-20  | <a href="http://www.mariposacounty.org/DocumentCenter/View/84045/Quarantine-HOO?bidId=">http://www.mariposacounty.org/DocumentCenter/View/84045/Quarantine-HOO?bidId=</a>                                                                                                                                                                                                                                                                                                                                                                                                           |
| Mariposa  | 3-Apr-20  | <a href="http://www.mariposacounty.org/DocumentCenter/View/84043/Isolate-HOO?bidId=">http://www.mariposacounty.org/DocumentCenter/View/84043/Isolate-HOO?bidId=</a>                                                                                                                                                                                                                                                                                                                                                                                                                 |
| Mariposa  | 6-Apr-20  | <a href="http://www.mariposacounty.org/DocumentCenter/View/84044/Lodging-HOO?bidId=">http://www.mariposacounty.org/DocumentCenter/View/84044/Lodging-HOO?bidId=</a>                                                                                                                                                                                                                                                                                                                                                                                                                 |
| Mariposa  | 7-May-20  | <a href="https://www.cdph.ca.gov/Programs/CID/DCDC/CDPH%20Document%20Library/COVID-19/SHO%20Order%205-7-2020.pdf">https://www.cdph.ca.gov/Programs/CID/DCDC/CDPH%20Document%20Library/COVID-19/SHO%20Order%205-7-2020.pdf</a>                                                                                                                                                                                                                                                                                                                                                       |
| Mariposa  | 14-May-20 | <a href="https://www.mercurynews.com/2020/05/14/coronavirus-county-near-bay-area-among-18-to-get-go-ahead-on-phase-2-reopening/">https://www.mercurynews.com/2020/05/14/coronavirus-county-near-bay-area-among-18-to-get-go-ahead-on-phase-2-reopening/</a>                                                                                                                                                                                                                                                                                                                         |
| Mariposa  | 26-May-20 | <a href="https://www.vcstar.com/story/news/2020/05/26/coronavirus-california-approves-reopening-barbershops-hair-salons/5261851002/">https://www.vcstar.com/story/news/2020/05/26/coronavirus-california-approves-reopening-barbershops-hair-salons/5261851002/</a>                                                                                                                                                                                                                                                                                                                 |
| Mariposa  | 8-Jun-20  | <a href="http://www.mariposacounty.org/DocumentCenter/View/85165/61120-Health-Officer-Order-Short-Term-Lodging?bidId=">http://www.mariposacounty.org/DocumentCenter/View/85165/61120-Health-Officer-Order-Short-Term-Lodging?bidId=</a>                                                                                                                                                                                                                                                                                                                                             |
| Mariposa  | 11-Jun-20 | <a href="https://ktla.com/news/california/california-reopens-to-tourists-but-with-changes-to-hotels-zoos-and-more/#:~:text=The%20state%20is%20giving%20the,Gov.&amp;text=Newsom%20issued%20a%20stay%20at,stores%20and%20restaurants%20to%20reop">https://ktla.com/news/california/california-reopens-to-tourists-but-with-changes-to-hotels-zoos-and-more/#:~:text=The%20state%20is%20giving%20the,Gov.&amp;text=Newsom%20issued%20a%20stay%20at,stores%20and%20restaurants%20to%20reop</a>                                                                                         |
| Mariposa  | 18-Jun-20 | <a href="https://www.cdph.ca.gov/Programs/CID/DCDC/CDPH%20Document%20Library/COVID-19/Guidance-for-Face-Coverings_06-18-2020.pdf">https://www.cdph.ca.gov/Programs/CID/DCDC/CDPH%20Document%20Library/COVID-19/Guidance-for-Face-Coverings_06-18-2020.pdf</a>                                                                                                                                                                                                                                                                                                                       |
| Mariposa  | 19-Jun-20 | <a href="https://apnews.com/e0b91103b33ff3896c89d0845f5b7bcf">https://apnews.com/e0b91103b33ff3896c89d0845f5b7bcf</a>                                                                                                                                                                                                                                                                                                                                                                                                                                                               |
| Mariposa  | 13-Jul-20 | <a href="https://www.latimes.com/california/story/2020-07-13/newsom-california-county-rollback-reopening-coronavirus">https://www.latimes.com/california/story/2020-07-13/newsom-california-county-rollback-reopening-coronavirus</a>                                                                                                                                                                                                                                                                                                                                               |
| Mariposa  | 3-Aug-20  | <a href="https://www.mariposacounty.org/DocumentCenter/View/85979/Revised-HOO---FRI---8-3-2020?bidId=">https://www.mariposacounty.org/DocumentCenter/View/85979/Revised-HOO---FRI---8-3-2020?bidId=</a>                                                                                                                                                                                                                                                                                                                                                                             |
| Mariposa  | 28-Aug-20 | <a href="https://www.mariposacounty.org/DocumentCenter/View/86196/Revised-HOO-Short-Term-Lodging?bidId=">https://www.mariposacounty.org/DocumentCenter/View/86196/Revised-HOO-Short-Term-Lodging?bidId=</a>                                                                                                                                                                                                                                                                                                                                                                         |
| Mariposa  | 28-Aug-20 | <a href="https://projects.sfchronicle.com/2020/coronavirus-map/california-reopening/">https://projects.sfchronicle.com/2020/coronavirus-map/california-reopening/</a>                                                                                                                                                                                                                                                                                                                                                                                                               |
| Mariposa  | 23-Sep-20 | <a href="https://projects.sfchronicle.com/2020/coronavirus-map/california-reopening/">https://projects.sfchronicle.com/2020/coronavirus-map/california-reopening/</a>                                                                                                                                                                                                                                                                                                                                                                                                               |
| Mariposa  | 25-Sep-20 | <a href="https://www.mariposacounty.org/DocumentCenter/View/86372/Revision-of-Health-Officer-Order-on-Short-Term-Lodging-2020-09-25">https://www.mariposacounty.org/DocumentCenter/View/86372/Revision-of-Health-Officer-Order-on-Short-Term-Lodging-2020-09-25</a>                                                                                                                                                                                                                                                                                                                 |
| Mariposa  | 9-Oct-20  | <a href="https://wp.sbcounty.gov/cao/countywire/?p=9160#:~:text=Private%20outdoor%20gatherings%20of%20three%20households%20now%20allowed%20throughout%20the%20county%2C%20state,-Published%20October%209&amp;text=Private%20outdoor%20gatherings%20of%20people,Gavin%20Newsom%20on%20Friday">https://wp.sbcounty.gov/cao/countywire/?p=9160#:~:text=Private%20outdoor%20gatherings%20of%20three%20households%20now%20allowed%20throughout%20the%20county%2C%20state,-Published%20October%209&amp;text=Private%20outdoor%20gatherings%20of%20people,Gavin%20Newsom%20on%20Friday</a> |
| Mariposa  | 13-Nov-20 | <a href="https://www.cdph.ca.gov/Programs/CID/DCDC/Pages/COVID-19/Guidance-for-the-Prevention-of-COVID-19-Transmission-for-Gatherings-November-2020.aspx">https://www.cdph.ca.gov/Programs/CID/DCDC/Pages/COVID-19/Guidance-for-the-Prevention-of-COVID-19-Transmission-for-Gatherings-November-2020.aspx</a>                                                                                                                                                                                                                                                                       |
| Mariposa  | 16-Nov-20 | <a href="https://www.cdph.ca.gov/Programs/CID/DCDC/Pages/COVID-19/guidance-for-face-coverings.aspx">https://www.cdph.ca.gov/Programs/CID/DCDC/Pages/COVID-19/guidance-for-face-coverings.aspx</a>                                                                                                                                                                                                                                                                                                                                                                                   |
| Mariposa  | 24-Nov-20 | <a href="https://www.kcra.com/article/california-covid-tiers-update-nov-24/34774234">https://www.kcra.com/article/california-covid-tiers-update-nov-24/34774234</a>                                                                                                                                                                                                                                                                                                                                                                                                                 |
| Mariposa  | 28-Nov-20 | <a href="https://abc30.com/mariposa-county-tier-changing-tiers-what/8309987/">https://abc30.com/mariposa-county-tier-changing-tiers-what/8309987/</a>                                                                                                                                                                                                                                                                                                                                                                                                                               |
| Mariposa  | 5-Dec-20  | <a href="https://www.gov.ca.gov/wp-content/uploads/2020/12/12.3.20-Stay-at-Home-Order-ICU-Scenario.pdf">https://www.gov.ca.gov/wp-content/uploads/2020/12/12.3.20-Stay-at-Home-Order-ICU-Scenario.pdf</a>                                                                                                                                                                                                                                                                                                                                                                           |
| Mariposa  | 7-Dec-20  | <a href="https://www.mariposacounty.org/DocumentCenter/View/87452/Revision-of-Health-Officers-Order-on-Short-Term-Lodging-December-7th-?bidId=">https://www.mariposacounty.org/DocumentCenter/View/87452/Revision-of-Health-Officers-Order-on-Short-Term-Lodging-December-7th-?bidId=</a>                                                                                                                                                                                                                                                                                           |
| Mariposa  | 22-Dec-20 | <a href="https://www.mariposacounty.org/DocumentCenter/View/87519/Health-Officers-Order-on-Restaurants-and-Dining-12222020?bidId=">https://www.mariposacounty.org/DocumentCenter/View/87519/Health-Officers-Order-on-Restaurants-and-Dining-12222020?bidId=</a>                                                                                                                                                                                                                                                                                                                     |
| Mendocino | 4-Mar-20  | <a href="https://www.mendocinocounty.org/Home/Components/News/News/4001/626?backlist=%2F">https://www.mendocinocounty.org/Home/Components/News/News/4001/626?backlist=%2F</a>                                                                                                                                                                                                                                                                                                                                                                                                       |
| Mendocino | 17-Mar-20 | <a href="https://www.mendocinocounty.org/home/showdocument?id=33062">https://www.mendocinocounty.org/home/showdocument?id=33062</a>                                                                                                                                                                                                                                                                                                                                                                                                                                                 |

|           |           |                                                                                                                                                                                                                                                               |
|-----------|-----------|---------------------------------------------------------------------------------------------------------------------------------------------------------------------------------------------------------------------------------------------------------------|
| Mendocino | 18-Mar-20 | <a href="https://www.mendocinocounty.org/home/showdocument?id=33103">https://www.mendocinocounty.org/home/showdocument?id=33103</a>                                                                                                                           |
| Mendocino | 19-Mar-20 | <a href="https://www.gov.ca.gov/wp-content/uploads/2020/03/3.19.20-attested-EO-N-33-20-COVID-19-HEALTH-ORDER.pdf">https://www.gov.ca.gov/wp-content/uploads/2020/03/3.19.20-attested-EO-N-33-20-COVID-19-HEALTH-ORDER.pdf</a>                                 |
| Mendocino | 22-Mar-20 | <a href="https://www.mendocinocounty.org/home/showdocument?id=33379">https://www.mendocinocounty.org/home/showdocument?id=33379</a>                                                                                                                           |
| Mendocino | 24-Mar-20 | <a href="https://web.archive.org/web/20200401221128/https://www.mendocinocounty.org/home/showdocument?id=33277">https://web.archive.org/web/20200401221128/https://www.mendocinocounty.org/home/showdocument?id=33277</a>                                     |
| Mendocino | 28-Mar-20 | <a href="https://www.mendocinocounty.org/Home/Components/News/News/4058/626?npage=3&amp;arch=1">https://www.mendocinocounty.org/Home/Components/News/News/4058/626?npage=3&amp;arch=1</a>                                                                     |
| Mendocino | 3-Apr-20  | <a href="https://www.mendocinocounty.org/Home/Components/News/News/4069/626?npage=2&amp;arch=1">https://www.mendocinocounty.org/Home/Components/News/News/4069/626?npage=2&amp;arch=1</a>                                                                     |
| Mendocino | 10-Apr-20 | <a href="https://www.mendocinocounty.org/home/showdocument?id=33692">https://www.mendocinocounty.org/home/showdocument?id=33692</a>                                                                                                                           |
| Mendocino | 24-Apr-20 | <a href="https://www.mendocinocounty.org/home/showdocument?id=35043">https://www.mendocinocounty.org/home/showdocument?id=35043</a>                                                                                                                           |
| Mendocino | 24-Apr-20 | <a href="https://www.mendocinocounty.org/home/showdocument?id=35041">https://www.mendocinocounty.org/home/showdocument?id=35041</a>                                                                                                                           |
| Mendocino | 8-May-20  | <a href="https://www.mendocinocounty.org/home/showdocument?id=35374">https://www.mendocinocounty.org/home/showdocument?id=35374</a>                                                                                                                           |
| Mendocino | 15-May-20 | <a href="https://www.mendocinocounty.org/Home/Components/News/News/5117/626?arch=1">https://www.mendocinocounty.org/Home/Components/News/News/5117/626?arch=1</a>                                                                                             |
| Mendocino | 22-May-20 | <a href="https://www.mendocinocounty.org/Home/Components/News/News/5127/626?arch=1">https://www.mendocinocounty.org/Home/Components/News/News/5127/626?arch=1</a>                                                                                             |
| Mendocino | 28-May-20 | <a href="https://www.mendocinocounty.org/Home/Components/News/News/5137/626?arch=1">https://www.mendocinocounty.org/Home/Components/News/News/5137/626?arch=1</a>                                                                                             |
| Mendocino | 11-Jun-20 | <a href="https://www.mendocinocounty.org/Home/Components/News/News/5143/626?npage=2">https://www.mendocinocounty.org/Home/Components/News/News/5143/626?npage=2</a>                                                                                           |
| Mendocino | 18-Jun-20 | <a href="https://www.cdph.ca.gov/Programs/CID/DCDC/CDPH%20Document%20Library/COVID-19/Guidance-for-Face-Coverings_06-18-2020.pdf">https://www.cdph.ca.gov/Programs/CID/DCDC/CDPH%20Document%20Library/COVID-19/Guidance-for-Face-Coverings_06-18-2020.pdf</a> |
| Mendocino | 19-Jun-20 | <a href="https://www.mendocinocounty.org/Home/Components/News/News/5149/626?npage=2">https://www.mendocinocounty.org/Home/Components/News/News/5149/626?npage=2</a>                                                                                           |
| Mendocino | 1-Jul-20  | <a href="https://www.mendocinocounty.org/Home/Components/News/News/5153/626?npage=2">https://www.mendocinocounty.org/Home/Components/News/News/5153/626?npage=2</a>                                                                                           |
| Mendocino | 2-Jul-20  | <a href="https://www.mendocinocounty.org/home/showdocument?id=36531">https://www.mendocinocounty.org/home/showdocument?id=36531</a>                                                                                                                           |
| Mendocino | 10-Jul-20 | <a href="https://www.mendocinocounty.org/home/showdocument?id=35368">https://www.mendocinocounty.org/home/showdocument?id=35368</a>                                                                                                                           |
| Mendocino | 13-Jul-20 | <a href="https://www.latimes.com/california/story/2020-07-13/newsom-california-county-rollback-reopening-coronavirus">https://www.latimes.com/california/story/2020-07-13/newsom-california-county-rollback-reopening-coronavirus</a>                         |
| Mendocino | 17-Jul-20 | <a href="https://www.mendocinocounty.org/Home/Components/News/News/5181/626?npage=2">https://www.mendocinocounty.org/Home/Components/News/News/5181/626?npage=2</a>                                                                                           |
| Mendocino | 3-Aug-20  | <a href="https://www.mendocinocounty.org/home/showdocument?id=36663">https://www.mendocinocounty.org/home/showdocument?id=36663</a>                                                                                                                           |
| Mendocino | 3-Aug-20  | <a href="https://www.mendocinocounty.org/home/showdocument?id=36661">https://www.mendocinocounty.org/home/showdocument?id=36661</a>                                                                                                                           |
| Mendocino | 13-Aug-20 | <a href="https://www.mendocinocounty.org/home/showdocument?id=37143">https://www.mendocinocounty.org/home/showdocument?id=37143</a>                                                                                                                           |
| Mendocino | 28-Aug-20 | <a href="https://www.mendocinocounty.org/home/showdocument?id=37430">https://www.mendocinocounty.org/home/showdocument?id=37430</a>                                                                                                                           |
| Mendocino | 22-Sep-20 | <a href="https://www.mendocinocounty.org/home/showdocument?id=37424">https://www.mendocinocounty.org/home/showdocument?id=37424</a>                                                                                                                           |

|           |           |                                                                                                                                                                                                                                                                                                                                                                                                                                                                                                                                                                                       |
|-----------|-----------|---------------------------------------------------------------------------------------------------------------------------------------------------------------------------------------------------------------------------------------------------------------------------------------------------------------------------------------------------------------------------------------------------------------------------------------------------------------------------------------------------------------------------------------------------------------------------------------|
| Mendocino | 22-Sep-20 | <a href="https://files.covid19.ca.gov/pdf/guidance-expanded-personal-care-services--en.pdf">https://files.covid19.ca.gov/pdf/guidance-expanded-personal-care-services--en.pdf</a>                                                                                                                                                                                                                                                                                                                                                                                                     |
| Mendocino | 9-Oct-20  | <a href="https://wp.sbcounty.gov/cao/countywire/?p=9160#:~:text=Private%20outdoor%20gatherings%20of%20three%20households%20now%20allowed%20throughout%20the%20county%2C%20state,-Published%20October%209&amp;text=Private%20outdoor%20gatherings%20of%20people,Gavin%20Newsom%20on%20Friday.">https://wp.sbcounty.gov/cao/countywire/?p=9160#:~:text=Private%20outdoor%20gatherings%20of%20three%20households%20now%20allowed%20throughout%20the%20county%2C%20state,-Published%20October%209&amp;text=Private%20outdoor%20gatherings%20of%20people,Gavin%20Newsom%20on%20Friday.</a> |
| Mendocino | 16-Oct-20 | <a href="https://www.mendocinocounty.org/home/showdocument?id=38488">https://www.mendocinocounty.org/home/showdocument?id=38488</a>                                                                                                                                                                                                                                                                                                                                                                                                                                                   |
| Mendocino | 27-Oct-20 | <a href="https://projects.sfchronicle.com/2020/coronavirus-map/california-reopening/">https://projects.sfchronicle.com/2020/coronavirus-map/california-reopening/</a>                                                                                                                                                                                                                                                                                                                                                                                                                 |
| Mendocino | 3-Nov-20  | <a href="https://www.mendocinocounty.org/home/showpublisheddocument?id=38850">https://www.mendocinocounty.org/home/showpublisheddocument?id=38850</a>                                                                                                                                                                                                                                                                                                                                                                                                                                 |
| Mendocino | 12-Nov-20 | <a href="https://www.mendocinocounty.org/home/showpublisheddocument?id=39041">https://www.mendocinocounty.org/home/showpublisheddocument?id=39041</a>                                                                                                                                                                                                                                                                                                                                                                                                                                 |
| Mendocino | 17-Nov-20 | <a href="https://kmp.com/news/local/40-california-counties-in-purple-tier-including-the-central-valley">https://kmp.com/news/local/40-california-counties-in-purple-tier-including-the-central-valley</a>                                                                                                                                                                                                                                                                                                                                                                             |
| Mendocino | 17-Nov-20 | <a href="https://www.mendocinocounty.org/home/showpublisheddocument?id=38488">https://www.mendocinocounty.org/home/showpublisheddocument?id=38488</a>                                                                                                                                                                                                                                                                                                                                                                                                                                 |
| Mendocino | 19-Nov-20 | <a href="https://www.cdph.ca.gov/Programs/CID/DCDC/Pages/COVID-19/limited-stay-at-home-order.aspx">https://www.cdph.ca.gov/Programs/CID/DCDC/Pages/COVID-19/limited-stay-at-home-order.aspx</a>                                                                                                                                                                                                                                                                                                                                                                                       |
| Mendocino | 16-Dec-20 | <a href="https://www.mendocinocounty.org/home/showpublisheddocument?id=39041">https://www.mendocinocounty.org/home/showpublisheddocument?id=39041</a>                                                                                                                                                                                                                                                                                                                                                                                                                                 |
| Merced    | 13-Mar-20 | <a href="https://www.cityofmerced.org/Home/Components/News/News/922/17">https://www.cityofmerced.org/Home/Components/News/News/922/17</a>                                                                                                                                                                                                                                                                                                                                                                                                                                             |
| Merced    | 19-Mar-20 | <a href="https://www.gov.ca.gov/wp-content/uploads/2020/03/3.19.20-attested-EO-N-33-20-COVID-19-HEALTH-ORDER.pdf">https://www.gov.ca.gov/wp-content/uploads/2020/03/3.19.20-attested-EO-N-33-20-COVID-19-HEALTH-ORDER.pdf</a>                                                                                                                                                                                                                                                                                                                                                         |
| Merced    | 20-Mar-20 | <a href="https://reopenmercedcounty.com/wp-content/uploads/2020/05/2020-03-20-HealthOrder.pdf">https://reopenmercedcounty.com/wp-content/uploads/2020/05/2020-03-20-HealthOrder.pdf</a>                                                                                                                                                                                                                                                                                                                                                                                               |
| Merced    | 21-Mar-20 | <a href="https://www.co.merced.ca.us/DocumentCenter/View/23835/Press-Release-3-21-2020-Limited-Public-Access-to-Merced-County-Buildings?bidId=">https://www.co.merced.ca.us/DocumentCenter/View/23835/Press-Release-3-21-2020-Limited-Public-Access-to-Merced-County-Buildings?bidId=</a>                                                                                                                                                                                                                                                                                             |
| Merced    | 7-Apr-20  | <a href="https://www.co.merced.ca.us/DocumentCenter/View/24108/Health-Officer-Order-472020?bidId=">https://www.co.merced.ca.us/DocumentCenter/View/24108/Health-Officer-Order-472020?bidId=</a>                                                                                                                                                                                                                                                                                                                                                                                       |
| Merced    | 7-Apr-20  | <a href="https://www.co.merced.ca.us/DocumentCenter/View/24109/Press-Release---New-Health-Order-482020?bidId=">https://www.co.merced.ca.us/DocumentCenter/View/24109/Press-Release---New-Health-Order-482020?bidId=</a>                                                                                                                                                                                                                                                                                                                                                               |
| Merced    | 8-Apr-20  | <a href="https://www.co.merced.ca.us/DocumentCenter/View/24127/Press-Release---New-Health-Order-Imposes-Stricter-Directives-to-Ensure-Health-and-Safety-482020?bidId=">https://www.co.merced.ca.us/DocumentCenter/View/24127/Press-Release---New-Health-Order-Imposes-Stricter-Directives-to-Ensure-Health-and-Safety-482020?bidId=</a>                                                                                                                                                                                                                                               |
| Merced    | 17-Apr-20 | <a href="https://www.co.merced.ca.us/DocumentCenter/View/24261/Health-Order-Amended-41720?bidId=">https://www.co.merced.ca.us/DocumentCenter/View/24261/Health-Order-Amended-41720?bidId=</a>                                                                                                                                                                                                                                                                                                                                                                                         |
| Merced    | 24-Apr-20 | <a href="https://www.co.merced.ca.us/DocumentCenter/View/24363/Press-Release-with-Health-Order-Amended-April-4-2020?bidId=">https://www.co.merced.ca.us/DocumentCenter/View/24363/Press-Release-with-Health-Order-Amended-April-4-2020?bidId=</a>                                                                                                                                                                                                                                                                                                                                     |
| Merced    | 8-May-20  | <a href="https://www.co.merced.ca.us/DocumentCenter/View/23832/Stay-at-Home-Order-5820?bidId=">https://www.co.merced.ca.us/DocumentCenter/View/23832/Stay-at-Home-Order-5820?bidId=</a>                                                                                                                                                                                                                                                                                                                                                                                               |
| Merced    | 20-May-20 | <a href="https://www.co.merced.ca.us/DocumentCenter/View/24679/Press-Release---Merced-County-Department-of-Public-Health-Attestation-Approved-to-Move-into-Stage-25-52020?bidId=">https://www.co.merced.ca.us/DocumentCenter/View/24679/Press-Release---Merced-County-Department-of-Public-Health-Attestation-Approved-to-Move-into-Stage-25-52020?bidId=</a>                                                                                                                                                                                                                         |
| Merced    | 12-Jun-20 | <a href="https://www.co.merced.ca.us/DocumentCenter/View/24890/Press-Release---Merced-County-Revises-Stay-At-Home-Order-into-Stay-Safe-Order-6122020">https://www.co.merced.ca.us/DocumentCenter/View/24890/Press-Release---Merced-County-Revises-Stay-At-Home-Order-into-Stay-Safe-Order-6122020</a>                                                                                                                                                                                                                                                                                 |
| Merced    | 18-Jun-20 | <a href="https://www.cdph.ca.gov/Programs/CID/DCDC/CDPH%20Document%20Library/COVID-19/Guidance-for-Face-Coverings_06-18-2020.pdf">https://www.cdph.ca.gov/Programs/CID/DCDC/CDPH%20Document%20Library/COVID-19/Guidance-for-Face-Coverings_06-18-2020.pdf</a>                                                                                                                                                                                                                                                                                                                         |
| Merced    | 19-Jun-20 | <a href="https://www.co.merced.ca.us/DocumentCenter/View/24890/Press-Release---Merced-County-Revises-Stay-At-Home-Order-into-Stay-Safe-Order-6122020">https://www.co.merced.ca.us/DocumentCenter/View/24890/Press-Release---Merced-County-Revises-Stay-At-Home-Order-into-Stay-Safe-Order-6122020</a>                                                                                                                                                                                                                                                                                 |
| Merced    | 2-Jul-20  | <a href="https://reopenmercedcounty.com/wp-content/uploads/2020/07/2020-07-02-OrderOfTheHealthOfficer-Guidance.pdf">https://reopenmercedcounty.com/wp-content/uploads/2020/07/2020-07-02-OrderOfTheHealthOfficer-Guidance.pdf</a>                                                                                                                                                                                                                                                                                                                                                     |
| Merced    | 10-Jul-20 | <a href="https://www.co.merced.ca.us/DocumentCenter/View/25080/Press-Release---Merced-County-Revises-Stay-Safe-Health-Order-to-Limit-Youth-Sports-7102020?bidId=">https://www.co.merced.ca.us/DocumentCenter/View/25080/Press-Release---Merced-County-Revises-Stay-Safe-Health-Order-to-Limit-Youth-Sports-7102020?bidId=</a>                                                                                                                                                                                                                                                         |
| Merced    | 13-Jul-20 | <a href="https://www.latimes.com/california/story/2020-07-13/newsom-california-county-rollback-reopening-coronavirus">https://www.latimes.com/california/story/2020-07-13/newsom-california-county-rollback-reopening-coronavirus</a>                                                                                                                                                                                                                                                                                                                                                 |

|        |           |                                                                                                                                                                                                                                                                                                                                                                                                                                                                                                                                                                                       |
|--------|-----------|---------------------------------------------------------------------------------------------------------------------------------------------------------------------------------------------------------------------------------------------------------------------------------------------------------------------------------------------------------------------------------------------------------------------------------------------------------------------------------------------------------------------------------------------------------------------------------------|
| Merced | 13-Jul-20 | <a href="https://www.mercedsunstar.com/news/coronavirus/article244204737.html">https://www.mercedsunstar.com/news/coronavirus/article244204737.html</a>                                                                                                                                                                                                                                                                                                                                                                                                                               |
| Merced | 17-Jul-20 | <a href="https://www.cdph.ca.gov/Programs/CID/DCDC/CDPH%20Document%20Library/COVID-19/Schools%20Reopening%20Recommendations.pdf">https://www.cdph.ca.gov/Programs/CID/DCDC/CDPH%20Document%20Library/COVID-19/Schools%20Reopening%20Recommendations.pdf</a>                                                                                                                                                                                                                                                                                                                           |
| Merced | 17-Jul-20 | <a href="https://www.co.merced.ca.us/DocumentCenter/View/25137/Statement-Regarding-COVID-19-Tracing-In-Merced-County-71720?bidId=">https://www.co.merced.ca.us/DocumentCenter/View/25137/Statement-Regarding-COVID-19-Tracing-In-Merced-County-71720?bidId=</a>                                                                                                                                                                                                                                                                                                                       |
| Merced | 20-Jul-20 | <a href="https://reopenmercedcounty.com/wp-content/uploads/2020/07/2020-07-20-OrderOfTheHealthOfficerGuidance.pdf">https://reopenmercedcounty.com/wp-content/uploads/2020/07/2020-07-20-OrderOfTheHealthOfficerGuidance.pdf</a>                                                                                                                                                                                                                                                                                                                                                       |
| Merced | 4-Aug-20  | <a href="https://www.co.merced.ca.us/DocumentCenter/View/25308/ORDER-OF-THE-HEALTH-OFFICER-8-4-2020-signed-with-Worship-Services?bidId=">https://www.co.merced.ca.us/DocumentCenter/View/25308/ORDER-OF-THE-HEALTH-OFFICER-8-4-2020-signed-with-Worship-Services?bidId=</a>                                                                                                                                                                                                                                                                                                           |
| Merced | 28-Aug-20 | <a href="https://abc7news.com/ca-reopneing-phases-covid19cagov-gavin-newsom-update-california-salon-reopening/6393805/">https://abc7news.com/ca-reopneing-phases-covid19cagov-gavin-newsom-update-california-salon-reopening/6393805/</a>                                                                                                                                                                                                                                                                                                                                             |
| Merced | 22-Sep-20 | <a href="https://files.covid19.ca.gov/pdf/guidance-expanded-personal-care-services--en.pdf">https://files.covid19.ca.gov/pdf/guidance-expanded-personal-care-services--en.pdf</a>                                                                                                                                                                                                                                                                                                                                                                                                     |
| Merced | 6-Oct-20  | <a href="https://www.mercedsunstar.com/news/article246263045.html">https://www.mercedsunstar.com/news/article246263045.html</a>                                                                                                                                                                                                                                                                                                                                                                                                                                                       |
| Merced | 9-Oct-20  | <a href="https://wp.sbcounty.gov/cao/countywire/?p=9160#:~:text=Private%20outdoor%20gatherings%20of%20three%20households%20now%20allowed%20throughout%20the%20county%2C%20state,-Published%20October%209&amp;text=Private%20outdoor%20gatherings%20of%20people,Gavin%20Newsom%20on%20Friday.">https://wp.sbcounty.gov/cao/countywire/?p=9160#:~:text=Private%20outdoor%20gatherings%20of%20three%20households%20now%20allowed%20throughout%20the%20county%2C%20state,-Published%20October%209&amp;text=Private%20outdoor%20gatherings%20of%20people,Gavin%20Newsom%20on%20Friday.</a> |
| Merced | 13-Nov-20 | <a href="https://www.cdph.ca.gov/Programs/CID/DCDC/Pages/COVID-19/Guidance-for-the-Prevention-of-COVID-19-Transmission-for-Gatherings-November-2020.aspx">https://www.cdph.ca.gov/Programs/CID/DCDC/Pages/COVID-19/Guidance-for-the-Prevention-of-COVID-19-Transmission-for-Gatherings-November-2020.aspx</a>                                                                                                                                                                                                                                                                         |
| Merced | 17-Nov-20 | <a href="https://kmpb.com/news/local/40-california-counties-in-purple-tier-including-the-central-valley">https://kmpb.com/news/local/40-california-counties-in-purple-tier-including-the-central-valley</a>                                                                                                                                                                                                                                                                                                                                                                           |
| Merced | 19-Nov-20 | <a href="https://www.cdph.ca.gov/Programs/CID/DCDC/Pages/COVID-19/limited-stay-at-home-order.aspx">https://www.cdph.ca.gov/Programs/CID/DCDC/Pages/COVID-19/limited-stay-at-home-order.aspx</a>                                                                                                                                                                                                                                                                                                                                                                                       |
| Merced | 5-Dec-20  | <a href="https://www.gov.ca.gov/wp-content/uploads/2020/12/12.3.20-Stay-at-Home-Order-ICU-Scenario.pdf">https://www.gov.ca.gov/wp-content/uploads/2020/12/12.3.20-Stay-at-Home-Order-ICU-Scenario.pdf</a>                                                                                                                                                                                                                                                                                                                                                                             |
| Modoc  | 9-Mar-20  | <a href="https://www.facebook.com/ModocCountyPublicHealth/photos/pcb.2799060100149284/2798968786825082">https://www.facebook.com/ModocCountyPublicHealth/photos/pcb.2799060100149284/2798968786825082</a>                                                                                                                                                                                                                                                                                                                                                                             |
| Modoc  | 12-Mar-20 | <a href="https://www.facebook.com/153688004804447/photos/a.484636461709598/1428202944019607/">https://www.facebook.com/153688004804447/photos/a.484636461709598/1428202944019607/</a>                                                                                                                                                                                                                                                                                                                                                                                                 |
| Modoc  | 12-Mar-20 | <a href="https://www.facebook.com/ModocCountyPublicHealth/photos/pcb.2801778459877448/2801776966544264">https://www.facebook.com/ModocCountyPublicHealth/photos/pcb.2801778459877448/2801776966544264</a>                                                                                                                                                                                                                                                                                                                                                                             |
| Modoc  | 19-Mar-20 | <a href="https://www.gov.ca.gov/wp-content/uploads/2020/03/3.19.20-attested-EO-N-33-20-COVID-19-HEALTH-ORDER.pdf">https://www.gov.ca.gov/wp-content/uploads/2020/03/3.19.20-attested-EO-N-33-20-COVID-19-HEALTH-ORDER.pdf</a>                                                                                                                                                                                                                                                                                                                                                         |
| Modoc  | 1-May-20  | <a href="https://www.facebook.com/ModocCountyPublicHealth/photos/pcb.2910134455708514/2910133465708613">https://www.facebook.com/ModocCountyPublicHealth/photos/pcb.2910134455708514/2910133465708613</a>                                                                                                                                                                                                                                                                                                                                                                             |
| Modoc  | 7-May-20  | <a href="https://www.facebook.com/ModocCountyPublicHealth/photos/a.401716119883706/2930453737009919/">https://www.facebook.com/ModocCountyPublicHealth/photos/a.401716119883706/2930453737009919/</a>                                                                                                                                                                                                                                                                                                                                                                                 |
| Modoc  | 18-May-20 | <a href="https://www.facebook.com/ModocCountyPublicHealth/photos/a.401716119883706/2960639163991376/">https://www.facebook.com/ModocCountyPublicHealth/photos/a.401716119883706/2960639163991376/</a>                                                                                                                                                                                                                                                                                                                                                                                 |
| Modoc  | 6-Jun-20  | <a href="https://www.facebook.com/ModocCountyPublicHealth/photos/a.401716119883706/3007021099353182/">https://www.facebook.com/ModocCountyPublicHealth/photos/a.401716119883706/3007021099353182/</a>                                                                                                                                                                                                                                                                                                                                                                                 |
| Modoc  | 18-Jun-20 | <a href="https://www.cdph.ca.gov/Programs/CID/DCDC/CDPH%20Document%20Library/COVID-19/Guidance-for-Face-Coverings_06-18-2020.pdf">https://www.cdph.ca.gov/Programs/CID/DCDC/CDPH%20Document%20Library/COVID-19/Guidance-for-Face-Coverings_06-18-2020.pdf</a>                                                                                                                                                                                                                                                                                                                         |
| Modoc  | 19-Jun-20 | <a href="https://www.facebook.com/ModocCountyPublicHealth/photos/a.401716119883706/3039761872745771/">https://www.facebook.com/ModocCountyPublicHealth/photos/a.401716119883706/3039761872745771/</a>                                                                                                                                                                                                                                                                                                                                                                                 |
| Modoc  | 13-Jul-20 | <a href="https://www.latimes.com/california/story/2020-07-13/newsom-california-county-rollback-reopening-coronavirus">https://www.latimes.com/california/story/2020-07-13/newsom-california-county-rollback-reopening-coronavirus</a>                                                                                                                                                                                                                                                                                                                                                 |
| Modoc  | 28-Jul-20 | <a href="https://modohealthservices.org/docs/forms/home-isolation-guidance.pdf">https://modohealthservices.org/docs/forms/home-isolation-guidance.pdf</a>                                                                                                                                                                                                                                                                                                                                                                                                                             |
| Modoc  | 28-Jul-20 | <a href="https://modohealthservices.org/docs/forms/home-quarantine-guidance.pdf">https://modohealthservices.org/docs/forms/home-quarantine-guidance.pdf</a>                                                                                                                                                                                                                                                                                                                                                                                                                           |
| Modoc  | 29-Jul-20 | <a href="https://modohealthservices.org/public-health-news/260-modoc-county-contact-tracing">https://modohealthservices.org/public-health-news/260-modoc-county-contact-tracing</a>                                                                                                                                                                                                                                                                                                                                                                                                   |
| Modoc  | 11-Aug-20 | <a href="https://modohealthservices.org/docs/forms/school-re-opening-guidance.pdf">https://modohealthservices.org/docs/forms/school-re-opening-guidance.pdf</a>                                                                                                                                                                                                                                                                                                                                                                                                                       |

|       |           |                                                                                                                                                                                                                                                                                                                                                                                                                                                                                                                                                                                       |
|-------|-----------|---------------------------------------------------------------------------------------------------------------------------------------------------------------------------------------------------------------------------------------------------------------------------------------------------------------------------------------------------------------------------------------------------------------------------------------------------------------------------------------------------------------------------------------------------------------------------------------|
| Modoc | 28-Aug-20 | <a href="https://projects.sfchronicle.com/2020/coronavirus-map/california-reopening/">https://projects.sfchronicle.com/2020/coronavirus-map/california-reopening/</a>                                                                                                                                                                                                                                                                                                                                                                                                                 |
| Modoc | 9-Oct-20  | <a href="https://wp.sbcounty.gov/cao/countywire/?p=9160#:~:text=Private%20outdoor%20gatherings%20of%20three%20households%20now%20allowed%20throughout%20the%20county%2C%20state,-Published%20October%209&amp;text=Private%20outdoor%20gatherings%20of%20people,Gavin%20Newsom%20on%20Friday.">https://wp.sbcounty.gov/cao/countywire/?p=9160#:~:text=Private%20outdoor%20gatherings%20of%20three%20households%20now%20allowed%20throughout%20the%20county%2C%20state,-Published%20October%209&amp;text=Private%20outdoor%20gatherings%20of%20people,Gavin%20Newsom%20on%20Friday.</a> |
| Modoc | 10-Nov-20 | <a href="https://www.latimes.com/california/story/2020-11-10/california-coronavirus-cases-climb-more-counties-expected-strict-reopenings">https://www.latimes.com/california/story/2020-11-10/california-coronavirus-cases-climb-more-counties-expected-strict-reopenings</a>                                                                                                                                                                                                                                                                                                         |
| Modoc | 13-Nov-20 | <a href="https://www.cdph.ca.gov/Programs/CID/DCDC/Pages/COVID-19/Guidance-for-the-Prevention-of-COVID-19-Transmission-for-Gatherings-November-2020.aspx">https://www.cdph.ca.gov/Programs/CID/DCDC/Pages/COVID-19/Guidance-for-the-Prevention-of-COVID-19-Transmission-for-Gatherings-November-2020.aspx</a>                                                                                                                                                                                                                                                                         |
| Modoc | 16-Nov-20 | <a href="https://www.cdph.ca.gov/Programs/CID/DCDC/Pages/COVID-19/guidance-for-face-coverings.aspx">https://www.cdph.ca.gov/Programs/CID/DCDC/Pages/COVID-19/guidance-for-face-coverings.aspx</a>                                                                                                                                                                                                                                                                                                                                                                                     |
| Modoc | 17-Nov-20 | <a href="https://modohealthservices.org/corona-virus">https://modohealthservices.org/corona-virus</a>                                                                                                                                                                                                                                                                                                                                                                                                                                                                                 |
| Modoc | 28-Nov-20 | <a href="https://kmpb.com/news/local/40-california-counties-in-purple-tier-including-the-central-valley">https://kmpb.com/news/local/40-california-counties-in-purple-tier-including-the-central-valley</a>                                                                                                                                                                                                                                                                                                                                                                           |
| Mono  | 15-Mar-20 | <a href="https://coronavirus.monocounty.ca.gov/datasets/a7adb68377ed4f16862263010c229387">https://coronavirus.monocounty.ca.gov/datasets/a7adb68377ed4f16862263010c229387</a>                                                                                                                                                                                                                                                                                                                                                                                                         |
| Mono  | 17-Mar-20 | <a href="https://webapps.mono.ca.gov/COVIDDocs/Directives/Health-officer-order-prohibiting-gatheringsMar172020.pdf">https://webapps.mono.ca.gov/COVIDDocs/Directives/Health-officer-order-prohibiting-gatheringsMar172020.pdf</a>                                                                                                                                                                                                                                                                                                                                                     |
| Mono  | 17-Mar-20 | <a href="https://webapps.mono.ca.gov/COVIDDocs/Directives/Health-officer-order-closing-bars-and-in-house-dining-March172020.pdf">https://webapps.mono.ca.gov/COVIDDocs/Directives/Health-officer-order-closing-bars-and-in-house-dining-March172020.pdf</a>                                                                                                                                                                                                                                                                                                                           |
| Mono  | 19-Mar-20 | <a href="https://www.gov.ca.gov/wp-content/uploads/2020/03/3.19.20-attested-EO-N-33-20-COVID-19-HEALTH-ORDER.pdf">https://www.gov.ca.gov/wp-content/uploads/2020/03/3.19.20-attested-EO-N-33-20-COVID-19-HEALTH-ORDER.pdf</a>                                                                                                                                                                                                                                                                                                                                                         |
| Mono  | 21-Mar-20 | <a href="https://webapps.mono.ca.gov/COVIDDocs//PublicResources/Unified%20Command%20%20Guidance%20on%20Short-term%20Rentals.pdf">https://webapps.mono.ca.gov/COVIDDocs//PublicResources/Unified%20Command%20%20Guidance%20on%20Short-term%20Rentals.pdf</a>                                                                                                                                                                                                                                                                                                                           |
| Mono  | 24-Mar-20 | <a href="https://webapps.mono.ca.gov/COVIDDocs/Directives/Public%20Health%20Order_3-24-2020.pdf">https://webapps.mono.ca.gov/COVIDDocs/Directives/Public%20Health%20Order_3-24-2020.pdf</a>                                                                                                                                                                                                                                                                                                                                                                                           |
| Mono  | 1-Apr-20  | <a href="https://webapps.mono.ca.gov/coviddocs/Directives/Public%20Health%20Order%20for%20Short-Term%20Rentals%20Amended.pdf">https://webapps.mono.ca.gov/coviddocs/Directives/Public%20Health%20Order%20for%20Short-Term%20Rentals%20Amended.pdf</a>                                                                                                                                                                                                                                                                                                                                 |
| Mono  | 13-Apr-20 | <a href="https://webapps.mono.ca.gov/coviddocs/PressReleases/PR-Face%20Coverings%20Required%20for%20Essential%20Workers_4-13-2020.pdf">https://webapps.mono.ca.gov/coviddocs/PressReleases/PR-Face%20Coverings%20Required%20for%20Essential%20Workers_4-13-2020.pdf</a>                                                                                                                                                                                                                                                                                                               |
| Mono  | 30-Apr-20 | <a href="https://webapps.mono.ca.gov/COVIDDocs//PressReleases/4.30.20_Order_Face%20Coverings%20in%20Public%20For%20All.pdf">https://webapps.mono.ca.gov/COVIDDocs//PressReleases/4.30.20_Order_Face%20Coverings%20in%20Public%20For%20All.pdf</a>                                                                                                                                                                                                                                                                                                                                     |
| Mono  | 2-May-20  | <a href="https://webapps.mono.ca.gov/COVIDDocs//Directives/Health%20Order_New%20Isolation%20Period_5-2-2020.pdf">https://webapps.mono.ca.gov/COVIDDocs//Directives/Health%20Order_New%20Isolation%20Period_5-2-2020.pdf</a>                                                                                                                                                                                                                                                                                                                                                           |
| Mono  | 6-May-20  | <a href="https://www.sierrawave.net/1st-modification-of-stay-at-home-order-retail-ops-with-curbside-pickup/">https://www.sierrawave.net/1st-modification-of-stay-at-home-order-retail-ops-with-curbside-pickup/</a>                                                                                                                                                                                                                                                                                                                                                                   |
| Mono  | 18-May-20 | <a href="https://webapps.mono.ca.gov/COVIDDocs//Directives/Short-Term-Rental-Order-Extension-2020-05-18-English.pdf">https://webapps.mono.ca.gov/COVIDDocs//Directives/Short-Term-Rental-Order-Extension-2020-05-18-English.pdf</a>                                                                                                                                                                                                                                                                                                                                                   |
| Mono  | 20-May-20 | <a href="https://coronavirus.monocounty.ca.gov/pages/reopening-updates">https://coronavirus.monocounty.ca.gov/pages/reopening-updates</a>                                                                                                                                                                                                                                                                                                                                                                                                                                             |
| Mono  | 27-May-20 | <a href="https://coronavirus.monocounty.ca.gov/datasets/6a0311c0cd5e476b88635ea8e5638cc2">https://coronavirus.monocounty.ca.gov/datasets/6a0311c0cd5e476b88635ea8e5638cc2</a>                                                                                                                                                                                                                                                                                                                                                                                                         |
| Mono  | 28-May-20 | <a href="https://webapps.mono.ca.gov/COVIDDocs//Directives/Order-Private%20Campgrounds%20and%20RV%20Park%20Guidance_2020-05-29.pdf">https://webapps.mono.ca.gov/COVIDDocs//Directives/Order-Private%20Campgrounds%20and%20RV%20Park%20Guidance_2020-05-29.pdf</a>                                                                                                                                                                                                                                                                                                                     |
| Mono  | 11-Jun-20 | <a href="https://ktla.com/news/california/california-reopens-to-tourists-but-with-changes-to-hotels-zoos-and-more/#:~:text=The%20state%20is%20giving%20the,Gov.&amp;text=Newsom%20issued%20a%20stay%20at%20home,stores%20and%20restaurants%20to%20reopn.">https://ktla.com/news/california/california-reopens-to-tourists-but-with-changes-to-hotels-zoos-and-more/#:~:text=The%20state%20is%20giving%20the,Gov.&amp;text=Newsom%20issued%20a%20stay%20at%20home,stores%20and%20restaurants%20to%20reopn.</a>                                                                         |
| Mono  | 11-Jun-20 | <a href="https://webapps.mono.ca.gov/COVIDDocs//Directives/06-11-2020-Order%20requiring%20that%20all%20businesses%20resuming%20operations%20comply%20with%20guidelines%20issued%20by%20the%20Local%20Health%20Officer.pdf">https://webapps.mono.ca.gov/COVIDDocs//Directives/06-11-2020-Order%20requiring%20that%20all%20businesses%20resuming%20operations%20comply%20with%20guidelines%20issued%20by%20the%20Local%20Health%20Officer.pdf</a>                                                                                                                                       |
| Mono  | 16-Jun-20 | <a href="https://webapps.mono.ca.gov/COVIDDocs//Directives/Campgrounds-RV%20Rescission-%20June%202016%202020.pdf">https://webapps.mono.ca.gov/COVIDDocs//Directives/Campgrounds-RV%20Rescission-%20June%202016%202020.pdf</a>                                                                                                                                                                                                                                                                                                                                                         |
| Mono  | 18-Jun-20 | <a href="https://www.sierrawave.net/mono-county-additional-personal-services-permitted-to-open-friday-june-19/">https://www.sierrawave.net/mono-county-additional-personal-services-permitted-to-open-friday-june-19/</a>                                                                                                                                                                                                                                                                                                                                                             |
| Mono  | 18-Jun-20 | <a href="https://webapps.mono.ca.gov/COVIDDocs//Directives/Rescission%20-%20Town%20lodging%20opening06-18-20FINAL.pdf">https://webapps.mono.ca.gov/COVIDDocs//Directives/Rescission%20-%20Town%20lodging%20opening06-18-20FINAL.pdf</a>                                                                                                                                                                                                                                                                                                                                               |
| Mono  | 18-Jun-20 | <a href="https://www.cdph.ca.gov/Programs/CID/DCDC/CDPH%20Document%20Library/COVID-19/Guidance-for-Face-Coverings_06-18-2020.pdf">https://www.cdph.ca.gov/Programs/CID/DCDC/CDPH%20Document%20Library/COVID-19/Guidance-for-Face-Coverings_06-18-2020.pdf</a>                                                                                                                                                                                                                                                                                                                         |

|          |           |                                                                                                                                                                                                                                                                                                                                                                                                                                                                                                                                                                                       |
|----------|-----------|---------------------------------------------------------------------------------------------------------------------------------------------------------------------------------------------------------------------------------------------------------------------------------------------------------------------------------------------------------------------------------------------------------------------------------------------------------------------------------------------------------------------------------------------------------------------------------------|
| Mono     | 27-Jun-20 | <a href="https://webapps.mono.ca.gov/coviddocs/Directives/Public%20Health%20Order-Immediate%20Closure%20of%20Tiger%20Bar%20in%20June%20Lake_6-27-2020.pdf">https://webapps.mono.ca.gov/coviddocs/Directives/Public%20Health%20Order-Immediate%20Closure%20of%20Tiger%20Bar%20in%20June%20Lake_6-27-2020.pdf</a>                                                                                                                                                                                                                                                                       |
| Mono     | 29-Jun-20 | <a href="https://webapps.mono.ca.gov/coviddocs/Directives/Public%20Health%20Officer%20Order,%20Revised%20Bar%20Rules%2006-29-2020.pdf">https://webapps.mono.ca.gov/coviddocs/Directives/Public%20Health%20Officer%20Order,%20Revised%20Bar%20Rules%2006-29-2020.pdf</a>                                                                                                                                                                                                                                                                                                               |
| Mono     | 29-Jun-20 | <a href="https://webapps.mono.ca.gov/coviddocs/Directives/Revised%20face%20covering%20Order%20June%2029.pdf">https://webapps.mono.ca.gov/coviddocs/Directives/Revised%20face%20covering%20Order%20June%2029.pdf</a>                                                                                                                                                                                                                                                                                                                                                                   |
| Mono     | 13-Jul-20 | <a href="https://www.latimes.com/california/story/2020-07-13/newsom-california-county-rollback-reopening-coronavirus">https://www.latimes.com/california/story/2020-07-13/newsom-california-county-rollback-reopening-coronavirus</a>                                                                                                                                                                                                                                                                                                                                                 |
| Mono     | 13-Jul-20 | <a href="https://webapps.mono.ca.gov/coviddocs/Directives/Contract%20Tracing%20Cooperation%20Rrder%20July%209%202020.pdf">https://webapps.mono.ca.gov/coviddocs/Directives/Contract%20Tracing%20Cooperation%20Rrder%20July%209%202020.pdf</a>                                                                                                                                                                                                                                                                                                                                         |
| Mono     | 20-Jul-20 | <a href="https://webapps.mono.ca.gov/coviddocs/Directives/Public%20Health%20Officer%20Order-Mammoth%20restaurant%20testing%20illness%20screening%20and%20education_7-20-2020.pdf">https://webapps.mono.ca.gov/coviddocs/Directives/Public%20Health%20Officer%20Order-Mammoth%20restaurant%20testing%20illness%20screening%20and%20education_7-20-2020.pdf</a>                                                                                                                                                                                                                         |
| Mono     | 23-Jul-20 | <a href="https://www.sierrawave.net/more-bad-news-for-mono-county-officially-on-states-monitoring-list/">https://www.sierrawave.net/more-bad-news-for-mono-county-officially-on-states-monitoring-list/</a>                                                                                                                                                                                                                                                                                                                                                                           |
| Mono     | 25-Jul-20 | <a href="https://webapps.mono.ca.gov/COIDDocs//Directives/Health%20Officer%20Order_Stellar%20Brew_07-25-2020.pdf">https://webapps.mono.ca.gov/COIDDocs//Directives/Health%20Officer%20Order_Stellar%20Brew_07-25-2020.pdf</a>                                                                                                                                                                                                                                                                                                                                                         |
| Mono     | 31-Jul-20 | <a href="https://webapps.mono.ca.gov/coviddocs/Directives/Gatherings-Clarification%20and%20Size%20Limits%20July%2031.pdf">https://webapps.mono.ca.gov/coviddocs/Directives/Gatherings-Clarification%20and%20Size%20Limits%20July%2031.pdf</a>                                                                                                                                                                                                                                                                                                                                         |
| Mono     | 11-Aug-20 | <a href="https://webapps.mono.ca.gov/coviddocs/Directives/Health%20Officer%20Order_Short%20Term%20Lodging_FINAL_8-11-2020.pdf">https://webapps.mono.ca.gov/coviddocs/Directives/Health%20Officer%20Order_Short%20Term%20Lodging_FINAL_8-11-2020.pdf</a>                                                                                                                                                                                                                                                                                                                               |
| Mono     | 14-Aug-20 | <a href="https://webapps.mono.ca.gov/COIDDocs//Directives/Updated%20COVID%20isolation%20guidance%20Aug%2014%202020.pdf">https://webapps.mono.ca.gov/COIDDocs//Directives/Updated%20COVID%20isolation%20guidance%20Aug%2014%202020.pdf</a>                                                                                                                                                                                                                                                                                                                                             |
| Mono     | 28-Aug-20 | <a href="https://projects.sfchronicle.com/2020/coronavirus-map/california-reopening/">https://projects.sfchronicle.com/2020/coronavirus-map/california-reopening/</a>                                                                                                                                                                                                                                                                                                                                                                                                                 |
| Mono     | 1-Sep-20  | <a href="https://webapps.mono.ca.gov/COIDDocs//Directives/Health%20Officer%20Order_Screening%20for%20illness%20in%20employees%208-31-2020.pdf">https://webapps.mono.ca.gov/COIDDocs//Directives/Health%20Officer%20Order_Screening%20for%20illness%20in%20employees%208-31-2020.pdf</a>                                                                                                                                                                                                                                                                                               |
| Mono     | 9-Oct-20  | <a href="https://wp.sbcounty.gov/cao/countywire/?p=9160#:~:text=Private%20outdoor%20gatherings%20of%20three%20households%20now%20allowed%20throughout%20the%20county%2C%20state,-Published%20October%209&amp;text=Private%20outdoor%20gatherings%20of%20people,Gavin%20Newsom%20on%20Friday.">https://wp.sbcounty.gov/cao/countywire/?p=9160#:~:text=Private%20outdoor%20gatherings%20of%20three%20households%20now%20allowed%20throughout%20the%20county%2C%20state,-Published%20October%209&amp;text=Private%20outdoor%20gatherings%20of%20people,Gavin%20Newsom%20on%20Friday.</a> |
| Mono     | 22-Oct-20 | <a href="https://webapps.mono.ca.gov/COIDDocs//Directives/Health%20Officer%20Order_Gatherings_Update%20on%20Restrictions_10-22-2020.pdf">https://webapps.mono.ca.gov/COIDDocs//Directives/Health%20Officer%20Order_Gatherings_Update%20on%20Restrictions_10-22-2020.pdf</a>                                                                                                                                                                                                                                                                                                           |
| Mono     | 17-Nov-20 | <a href="https://kmph.com/news/local/40-california-counties-in-purple-tier-including-the-central-valley">https://kmph.com/news/local/40-california-counties-in-purple-tier-including-the-central-valley</a>                                                                                                                                                                                                                                                                                                                                                                           |
| Mono     | 22-Nov-20 | <a href="https://webapps.mono.ca.gov/coviddocs/Directives/Health%20Officer%20Order_Access%20to%20Essential%20Businesses_11-22-2020.pdf">https://webapps.mono.ca.gov/coviddocs/Directives/Health%20Officer%20Order_Access%20to%20Essential%20Businesses_11-22-2020.pdf</a>                                                                                                                                                                                                                                                                                                             |
| Mono     | 1-Dec-20  | <a href="https://www.kcra.com/article/another-county-moves-into-californias-most-restrictive-covid-tier/34839906">https://www.kcra.com/article/another-county-moves-into-californias-most-restrictive-covid-tier/34839906</a>                                                                                                                                                                                                                                                                                                                                                         |
| Mono     | 5-Dec-20  | <a href="https://www.gov.ca.gov/wp-content/uploads/2020/12/12.3.20-Stay-at-Home-Order-ICU-Scenario.pdf">https://www.gov.ca.gov/wp-content/uploads/2020/12/12.3.20-Stay-at-Home-Order-ICU-Scenario.pdf</a>                                                                                                                                                                                                                                                                                                                                                                             |
| Mono     | 5-Dec-20  | <a href="https://webapps.mono.ca.gov/coviddocs/PressReleases/Health%20Officer%20Order_Clarification%20of%20CDPH%20Regional%20Stay-at-Home%20Order%20as%20Related%20to%20Lodging%20Facilities_12-5-2020.pdf">https://webapps.mono.ca.gov/coviddocs/PressReleases/Health%20Officer%20Order_Clarification%20of%20CDPH%20Regional%20Stay-at-Home%20Order%20as%20Related%20to%20Lodging%20Facilities_12-5-2020.pdf</a>                                                                                                                                                                     |
| Mono     | 16-Dec-20 | <a href="https://webapps.mono.ca.gov/COIDDocs//Directives/Quarantine%20Guidance%20modification%20Dec%2016%202020.pdf">https://webapps.mono.ca.gov/COIDDocs//Directives/Quarantine%20Guidance%20modification%20Dec%2016%202020.pdf</a>                                                                                                                                                                                                                                                                                                                                                 |
| Monterey | 6-Mar-20  | <a href="https://www.co.monterey.ca.us/Home/Components/News/News/6095/1336">https://www.co.monterey.ca.us/Home/Components/News/News/6095/1336</a>                                                                                                                                                                                                                                                                                                                                                                                                                                     |
| Monterey | 16-Mar-20 | <a href="https://www.kion546.com/news/2020/03/16/law-enforcement-and-jails-taking-precautions-to-stop-spread-of-coronavirus/">https://www.kion546.com/news/2020/03/16/law-enforcement-and-jails-taking-precautions-to-stop-spread-of-coronavirus/</a>                                                                                                                                                                                                                                                                                                                                 |
| Monterey | 17-Mar-20 | <a href="http://www.montereycountyweekly.com/blogs/news_blog/monterey-county-supervisors-unanimously-approve-covid-19-eviction-protections-through-may-31/article_f59a93f4-6883-11ea-b8d8-273de6f38555.html">http://www.montereycountyweekly.com/blogs/news_blog/monterey-county-supervisors-unanimously-approve-covid-19-eviction-protections-through-may-31/article_f59a93f4-6883-11ea-b8d8-273de6f38555.html</a>                                                                                                                                                                   |
| Monterey | 17-Mar-20 | <a href="https://www.co.monterey.ca.us/home/showdocument?id=87957">https://www.co.monterey.ca.us/home/showdocument?id=87957</a>                                                                                                                                                                                                                                                                                                                                                                                                                                                       |
| Monterey | 18-Mar-20 | <a href="https://kion546.com/news/2020/03/18/monterey-county-eoc-rises-to-level-2-to-support-coronavirus-response/">https://kion546.com/news/2020/03/18/monterey-county-eoc-rises-to-level-2-to-support-coronavirus-response/</a>                                                                                                                                                                                                                                                                                                                                                     |
| Monterey | 19-Mar-20 | <a href="https://www.gov.ca.gov/wp-content/uploads/2020/03/3.19.20-attested-EO-N-33-20-COVID-19-HEALTH-ORDER.pdf">https://www.gov.ca.gov/wp-content/uploads/2020/03/3.19.20-attested-EO-N-33-20-COVID-19-HEALTH-ORDER.pdf</a>                                                                                                                                                                                                                                                                                                                                                         |

|          |           |                                                                                                                                                                                                                                                                                                                                                                                                                                                                                                                                                                                       |
|----------|-----------|---------------------------------------------------------------------------------------------------------------------------------------------------------------------------------------------------------------------------------------------------------------------------------------------------------------------------------------------------------------------------------------------------------------------------------------------------------------------------------------------------------------------------------------------------------------------------------------|
| Monterey | 3-Apr-20  | <a href="https://www.co.monterey.ca.us/Home/Components/News/News/6199/1336">https://www.co.monterey.ca.us/Home/Components/News/News/6199/1336</a>                                                                                                                                                                                                                                                                                                                                                                                                                                     |
| Monterey | 6-Apr-20  | <a href="https://kion546.com/health/coronavirus/2020/04/06/monterey-county-eoc-rises-to-highest-activation-level-in-response-to-coronavirus/">https://kion546.com/health/coronavirus/2020/04/06/monterey-county-eoc-rises-to-highest-activation-level-in-response-to-coronavirus/</a>                                                                                                                                                                                                                                                                                                 |
| Monterey | 24-Apr-20 | <a href="https://www.co.monterey.ca.us/home/showdocument?id=90081">https://www.co.monterey.ca.us/home/showdocument?id=90081</a>                                                                                                                                                                                                                                                                                                                                                                                                                                                       |
| Monterey | 28-Apr-20 | <a href="https://www.co.monterey.ca.us/home/showdocument?id=90136">https://www.co.monterey.ca.us/home/showdocument?id=90136</a>                                                                                                                                                                                                                                                                                                                                                                                                                                                       |
| Monterey | 1-May-20  | <a href="https://www.co.monterey.ca.us/home/showdocument?id=90238">https://www.co.monterey.ca.us/home/showdocument?id=90238</a>                                                                                                                                                                                                                                                                                                                                                                                                                                                       |
| Monterey | 3-May-20  | <a href="https://www.co.monterey.ca.us/Home/ShowDocument?id=90242">https://www.co.monterey.ca.us/Home/ShowDocument?id=90242</a>                                                                                                                                                                                                                                                                                                                                                                                                                                                       |
| Monterey | 8-May-20  | <a href="https://www.co.monterey.ca.us/home/showdocument?id=90318">https://www.co.monterey.ca.us/home/showdocument?id=90318</a>                                                                                                                                                                                                                                                                                                                                                                                                                                                       |
| Monterey | 18-May-20 | <a href="https://www.co.monterey.ca.us/home/showdocument?id=90631">https://www.co.monterey.ca.us/home/showdocument?id=90631</a>                                                                                                                                                                                                                                                                                                                                                                                                                                                       |
| Monterey | 19-May-20 | <a href="https://kion546.com/health/coronavirus/2020/05/19/monterey-county-extends-eviction-moratorium-through-july/">https://kion546.com/health/coronavirus/2020/05/19/monterey-county-extends-eviction-moratorium-through-july/</a>                                                                                                                                                                                                                                                                                                                                                 |
| Monterey | 26-May-20 | <a href="https://www.co.monterey.ca.us/home/showdocument?id=90709">https://www.co.monterey.ca.us/home/showdocument?id=90709</a>                                                                                                                                                                                                                                                                                                                                                                                                                                                       |
| Monterey | 8-Jun-20  | <a href="https://www.co.monterey.ca.us/Home/Components/News/News/7389/1336">https://www.co.monterey.ca.us/Home/Components/News/News/7389/1336</a>                                                                                                                                                                                                                                                                                                                                                                                                                                     |
| Monterey | 11-Jun-20 | <a href="https://www.co.monterey.ca.us/home/showdocument?id=91020">https://www.co.monterey.ca.us/home/showdocument?id=91020</a>                                                                                                                                                                                                                                                                                                                                                                                                                                                       |
| Monterey | 11-Jun-20 | <a href="https://www.co.monterey.ca.us/home/showdocument?id=91024">https://www.co.monterey.ca.us/home/showdocument?id=91024</a>                                                                                                                                                                                                                                                                                                                                                                                                                                                       |
| Monterey | 16-Jun-20 | <a href="https://www.co.monterey.ca.us/Home/Components/News/News/7410/1336">https://www.co.monterey.ca.us/Home/Components/News/News/7410/1336</a>                                                                                                                                                                                                                                                                                                                                                                                                                                     |
| Monterey | 18-Jun-20 | <a href="https://www.co.monterey.ca.us/home/showdocument?id=92314">https://www.co.monterey.ca.us/home/showdocument?id=92314</a>                                                                                                                                                                                                                                                                                                                                                                                                                                                       |
| Monterey | 18-Jun-20 | <a href="https://www.cdph.ca.gov/Programs/CID/DCDC/CDPH%20Document%20Library/COVID-19/Guidance-for-Face-Coverings_06-18-2020.pdf">https://www.cdph.ca.gov/Programs/CID/DCDC/CDPH%20Document%20Library/COVID-19/Guidance-for-Face-Coverings_06-18-2020.pdf</a>                                                                                                                                                                                                                                                                                                                         |
| Monterey | 2-Jul-20  | <a href="https://www.co.monterey.ca.us/Home/Components/News/News/7445/1336#:~:text=In%20a%20coordinated%20public%20health,through%20Sunday%2C%20July%205th.">https://www.co.monterey.ca.us/Home/Components/News/News/7445/1336#:~:text=In%20a%20coordinated%20public%20health,through%20Sunday%2C%20July%205th.</a>                                                                                                                                                                                                                                                                   |
| Monterey | 6-Jul-20  | <a href="https://www.thecalifornian.com/story/news/2020/07/06/monterey-county-california-close-bars-indoor-services-restaurants-amid-covid-19-surge/5386215002">https://www.thecalifornian.com/story/news/2020/07/06/monterey-county-california-close-bars-indoor-services-restaurants-amid-covid-19-surge/5386215002</a>                                                                                                                                                                                                                                                             |
| Monterey | 13-Jul-20 | <a href="https://www.latimes.com/california/story/2020-07-13/newsom-california-county-rollback-reopening-coronavirus">https://www.latimes.com/california/story/2020-07-13/newsom-california-county-rollback-reopening-coronavirus</a>                                                                                                                                                                                                                                                                                                                                                 |
| Monterey | 28-Jul-20 | <a href="https://www.co.monterey.ca.us/government/departments-a-h/health/diseases/2019-novel-coronavirus-covid-19/health-officer-shelter-in-place-order/health-officer-order-face-coverings">https://www.co.monterey.ca.us/government/departments-a-h/health/diseases/2019-novel-coronavirus-covid-19/health-officer-shelter-in-place-order/health-officer-order-face-coverings</a>                                                                                                                                                                                                   |
| Monterey | 28-Aug-20 | <a href="https://abc7news.com/ca-reopneing-phases-covid19cagov-gavin-newsom-update-california-salon-reopening/6393805/">https://abc7news.com/ca-reopneing-phases-covid19cagov-gavin-newsom-update-california-salon-reopening/6393805/</a>                                                                                                                                                                                                                                                                                                                                             |
| Monterey | 22-Sep-20 | <a href="https://files.covid19.ca.gov/pdf/guidance-expanded-personal-care-services--en.pdf">https://files.covid19.ca.gov/pdf/guidance-expanded-personal-care-services--en.pdf</a>                                                                                                                                                                                                                                                                                                                                                                                                     |
| Monterey | 9-Oct-20  | <a href="https://wp.sbcounty.gov/cao/countywire/?p=9160#:~:text=Private%20outdoor%20gatherings%20of%20three%20households%20now%20allowed%20throughout%20the%20county%2C%20State,-Published%20October%209&amp;text=Private%20outdoor%20gatherings%20of%20people,Gavin%20Newsom%20on%20Friday.">https://wp.sbcounty.gov/cao/countywire/?p=9160#:~:text=Private%20outdoor%20gatherings%20of%20three%20households%20now%20allowed%20throughout%20the%20county%2C%20State,-Published%20October%209&amp;text=Private%20outdoor%20gatherings%20of%20people,Gavin%20Newsom%20on%20Friday.</a> |
| Monterey | 19-Nov-20 | <a href="https://www.cdph.ca.gov/Programs/CID/DCDC/Pages/COVID-19/limited-stay-at-home-order.aspx">https://www.cdph.ca.gov/Programs/CID/DCDC/Pages/COVID-19/limited-stay-at-home-order.aspx</a>                                                                                                                                                                                                                                                                                                                                                                                       |
| Monterey | 9-Dec-20  | <a href="https://www.co.monterey.ca.us/home/showpublisheddocument?id=98430">https://www.co.monterey.ca.us/home/showpublisheddocument?id=98430</a>                                                                                                                                                                                                                                                                                                                                                                                                                                     |
| Monterey | 16-Dec-20 | <a href="https://www.gov.ca.gov/wp-content/uploads/2020/12/12.3.20-Stay-at-Home-Order-ICU-Scenario.pdf">https://www.gov.ca.gov/wp-content/uploads/2020/12/12.3.20-Stay-at-Home-Order-ICU-Scenario.pdf</a>                                                                                                                                                                                                                                                                                                                                                                             |



|      |           |                                                                                                                                                                                                                                                                                                                                                                                                                                                                                                                                                                                       |
|------|-----------|---------------------------------------------------------------------------------------------------------------------------------------------------------------------------------------------------------------------------------------------------------------------------------------------------------------------------------------------------------------------------------------------------------------------------------------------------------------------------------------------------------------------------------------------------------------------------------------|
| Napa | 12-Mar-20 | <a href="https://www.countyofnapa.org/CivicAlerts.aspx?AID=142#:~:text=Karen%20Relucio%2C%20Napa%20County%20Public,confirmed%20cases%20at%20this%20time.&amp;text=Newsom%20announced%20that%20California%20public,updated%20directive%20on%20mass%20gatherings.">https://www.countyofnapa.org/CivicAlerts.aspx?AID=142#:~:text=Karen%20Relucio%2C%20Napa%20County%20Public,confirmed%20cases%20at%20this%20time.&amp;text=Newsom%20announced%20that%20California%20public,updated%20directive%20on%20mass%20gatherings.</a>                                                           |
| Napa | 17-Mar-20 | <a href="https://www.countyofnapa.org/DocumentCenter/View/16673/Health-Officer-Order-3-17-2020-PDF">https://www.countyofnapa.org/DocumentCenter/View/16673/Health-Officer-Order-3-17-2020-PDF</a>                                                                                                                                                                                                                                                                                                                                                                                     |
| Napa | 18-Mar-20 | <a href="https://www.countyofnapa.org/DocumentCenter/View/16687/3-18-2020-Shelter-at-Home-Order">https://www.countyofnapa.org/DocumentCenter/View/16687/3-18-2020-Shelter-at-Home-Order</a>                                                                                                                                                                                                                                                                                                                                                                                           |
| Napa | 19-Mar-20 | <a href="https://www.gov.ca.gov/wp-content/uploads/2020/03/3.19.20-attested-EO-N-33-20-COVID-19-HEALTH-ORDER.pdf">https://www.gov.ca.gov/wp-content/uploads/2020/03/3.19.20-attested-EO-N-33-20-COVID-19-HEALTH-ORDER.pdf</a>                                                                                                                                                                                                                                                                                                                                                         |
| Napa | 24-Mar-20 | <a href="https://www.countyofnapa.org/DocumentCenter/View/16784/3-24-20-Health-Officer-Order-Lab-Reporting">https://www.countyofnapa.org/DocumentCenter/View/16784/3-24-20-Health-Officer-Order-Lab-Reporting</a>                                                                                                                                                                                                                                                                                                                                                                     |
| Napa | 2-Apr-20  | <a href="https://www.mercurynews.com/2020/04/22/coronavirus-napa-county-eases-some-shelter-in-place-restrictions-ahead-of-schedule/">https://www.mercurynews.com/2020/04/22/coronavirus-napa-county-eases-some-shelter-in-place-restrictions-ahead-of-schedule/</a>                                                                                                                                                                                                                                                                                                                   |
| Napa | 22-Apr-20 | <a href="https://www.nbcbayarea.com/news/coronavirus/napa-county-loosens-coronavirus-restrictions-for-golf-courses-construction/2277550/">https://www.nbcbayarea.com/news/coronavirus/napa-county-loosens-coronavirus-restrictions-for-golf-courses-construction/2277550/</a>                                                                                                                                                                                                                                                                                                         |
| Napa | 8-May-20  | <a href="https://www.countyofnapa.org/CivicAlerts.aspx?AID=163">https://www.countyofnapa.org/CivicAlerts.aspx?AID=163</a>                                                                                                                                                                                                                                                                                                                                                                                                                                                             |
| Napa | 19-May-20 | <a href="https://napavalleyregister.com/news/local/restaurants-in-napa-county-begin-reopening-process/article_ca127fbf-33cc-505b-9532-9517b13b6030.html">https://napavalleyregister.com/news/local/restaurants-in-napa-county-begin-reopening-process/article_ca127fbf-33cc-505b-9532-9517b13b6030.html</a>                                                                                                                                                                                                                                                                           |
| Napa | 26-May-20 | <a href="https://www.countyofnapa.org/CivicAlerts.aspx?AID=167">https://www.countyofnapa.org/CivicAlerts.aspx?AID=167</a>                                                                                                                                                                                                                                                                                                                                                                                                                                                             |
| Napa | 4-Jun-20  | <a href="https://www.countyofnapa.org/CivicAlerts.aspx?AID=172">https://www.countyofnapa.org/CivicAlerts.aspx?AID=172</a>                                                                                                                                                                                                                                                                                                                                                                                                                                                             |
| Napa | 5-Jun-20  | <a href="https://napavalleyregister.com/news/local/napa-county-oks-wineries-to-reopen-to-public/article_0d79105f-a1c9-582b-8e40-fd3275375133.html">https://napavalleyregister.com/news/local/napa-county-oks-wineries-to-reopen-to-public/article_0d79105f-a1c9-582b-8e40-fd3275375133.html</a>                                                                                                                                                                                                                                                                                       |
| Napa | 17-Jun-20 | <a href="https://www.countyofnapa.org/DocumentCenter/View/18044/Blanket-Quarantine-Directive_English-and-Spanish">https://www.countyofnapa.org/DocumentCenter/View/18044/Blanket-Quarantine-Directive_English-and-Spanish</a>                                                                                                                                                                                                                                                                                                                                                         |
| Napa | 17-Jun-20 | <a href="https://www.countyofnapa.org/DocumentCenter/View/18045/Blanket-Isolation-Directive_English-and-Spanish">https://www.countyofnapa.org/DocumentCenter/View/18045/Blanket-Isolation-Directive_English-and-Spanish</a>                                                                                                                                                                                                                                                                                                                                                           |
| Napa | 18-Jun-20 | <a href="https://www.countyofnapa.org/DocumentCenter/View/18144/Shelter-at-Home-Order-No-20-06-6182020?bidId=">https://www.countyofnapa.org/DocumentCenter/View/18144/Shelter-at-Home-Order-No-20-06-6182020?bidId=</a>                                                                                                                                                                                                                                                                                                                                                               |
| Napa | 18-Jun-20 | <a href="https://www.cdph.ca.gov/Programs/CID/DCDC/CDPH%20Document%20Library/COVID-19/Guidance-for-Face-Coverings_06-18-2020.pdf">https://www.cdph.ca.gov/Programs/CID/DCDC/CDPH%20Document%20Library/COVID-19/Guidance-for-Face-Coverings_06-18-2020.pdf</a>                                                                                                                                                                                                                                                                                                                         |
| Napa | 19-Jun-20 | <a href="https://patch.com/california/napavalley/gyms-nail-salons-among-napa-county-businesses-allowed-reopen">https://patch.com/california/napavalley/gyms-nail-salons-among-napa-county-businesses-allowed-reopen</a>                                                                                                                                                                                                                                                                                                                                                               |
| Napa | 8-Jul-20  | <a href="https://www.countyofnapa.org/DocumentCenter/View/17112/Shelter-at-Home-Order-7-8-2020--?bidId=">https://www.countyofnapa.org/DocumentCenter/View/17112/Shelter-at-Home-Order-7-8-2020--?bidId=</a>                                                                                                                                                                                                                                                                                                                                                                           |
| Napa | 13-Jul-20 | <a href="https://www.latimes.com/california/story/2020-07-13/newsom-california-county-rollback-reopening-coronavirus">https://www.latimes.com/california/story/2020-07-13/newsom-california-county-rollback-reopening-coronavirus</a>                                                                                                                                                                                                                                                                                                                                                 |
| Napa | 13-Jul-20 | <a href="https://covid19.ca.gov/roadmap-counties/">https://covid19.ca.gov/roadmap-counties/</a>                                                                                                                                                                                                                                                                                                                                                                                                                                                                                       |
| Napa | 14-Jul-20 | <a href="https://www.countyofnapa.org/DocumentCenter/View/18139/07142020-Final-Urgency-Enforcement-Ordinance">https://www.countyofnapa.org/DocumentCenter/View/18139/07142020-Final-Urgency-Enforcement-Ordinance</a>                                                                                                                                                                                                                                                                                                                                                                 |
| Napa | 17-Jul-20 | <a href="https://www.cdph.ca.gov/Programs/CID/DCDC/CDPH%20Document%20Library/COVID-19/Schools%20Reopening%20Recommendations.pdf">https://www.cdph.ca.gov/Programs/CID/DCDC/CDPH%20Document%20Library/COVID-19/Schools%20Reopening%20Recommendations.pdf</a>                                                                                                                                                                                                                                                                                                                           |
| Napa | 28-Aug-20 | <a href="https://projects.sfchronicle.com/2020/coronavirus-map/california-reopening/">https://projects.sfchronicle.com/2020/coronavirus-map/california-reopening/</a>                                                                                                                                                                                                                                                                                                                                                                                                                 |
| Napa | 2-Oct-20  | <a href="https://www.countyofnapa.org/DocumentCenter/View/19094/Rescission-of-Health-Officer-Facilities-Order-20-02">https://www.countyofnapa.org/DocumentCenter/View/19094/Rescission-of-Health-Officer-Facilities-Order-20-02</a>                                                                                                                                                                                                                                                                                                                                                   |
| Napa | 9-Oct-20  | <a href="https://wp.sbcounty.gov/cao/countywire/?p=9160#:~:text=Private%20outdoor%20gatherings%20of%20three%20households%20now%20allowed%20throughout%20the%20county%2C%20state,-Published%20October%209&amp;text=Private%20outdoor%20gatherings%20of%20people,Gavin%20Newsom%20on%20Friday.">https://wp.sbcounty.gov/cao/countywire/?p=9160#:~:text=Private%20outdoor%20gatherings%20of%20three%20households%20now%20allowed%20throughout%20the%20county%2C%20state,-Published%20October%209&amp;text=Private%20outdoor%20gatherings%20of%20people,Gavin%20Newsom%20on%20Friday.</a> |
| Napa | 13-Nov-20 | <a href="https://www.cdph.ca.gov/Programs/CID/DCDC/Pages/COVID-19/Guidance-for-the-Prevention-of-COVID-19-Transmission-for-Gatherings-November-2020.aspx">https://www.cdph.ca.gov/Programs/CID/DCDC/Pages/COVID-19/Guidance-for-the-Prevention-of-COVID-19-Transmission-for-Gatherings-November-2020.aspx</a>                                                                                                                                                                                                                                                                         |
| Napa | 17-Nov-20 | <a href="https://kmpb.com/news/local/40-california-counties-in-purple-tier-including-the-central-valley">https://kmpb.com/news/local/40-california-counties-in-purple-tier-including-the-central-valley</a>                                                                                                                                                                                                                                                                                                                                                                           |
| Napa | 19-Nov-20 | <a href="https://www.cdph.ca.gov/Programs/CID/DCDC/Pages/COVID-19/limited-stay-at-home-order.aspx">https://www.cdph.ca.gov/Programs/CID/DCDC/Pages/COVID-19/limited-stay-at-home-order.aspx</a>                                                                                                                                                                                                                                                                                                                                                                                       |

|        |           |                                                                                                                                                                                                                                                                                                                                                                                                                                                                                                                                                                                       |
|--------|-----------|---------------------------------------------------------------------------------------------------------------------------------------------------------------------------------------------------------------------------------------------------------------------------------------------------------------------------------------------------------------------------------------------------------------------------------------------------------------------------------------------------------------------------------------------------------------------------------------|
| Napa   | 16-Dec-20 | <a href="https://www.gov.ca.gov/wp-content/uploads/2020/12/12.3.20-Stay-at-Home-Order-ICU-Scenario.pdf">https://www.gov.ca.gov/wp-content/uploads/2020/12/12.3.20-Stay-at-Home-Order-ICU-Scenario.pdf</a>                                                                                                                                                                                                                                                                                                                                                                             |
| Nevada | 4-Mar-20  | <a href="https://www.mynevadacounty.com/CivicAlerts.aspx?AID=2801">https://www.mynevadacounty.com/CivicAlerts.aspx?AID=2801</a>                                                                                                                                                                                                                                                                                                                                                                                                                                                       |
| Nevada | 16-Mar-20 | <a href="https://www.mynevadacounty.com/CivicAlerts.aspx?AID=2827">https://www.mynevadacounty.com/CivicAlerts.aspx?AID=2827</a>                                                                                                                                                                                                                                                                                                                                                                                                                                                       |
| Nevada | 18-Mar-20 | <a href="https://www.mynevadacounty.com/CivicAlerts.aspx?AID=2839">https://www.mynevadacounty.com/CivicAlerts.aspx?AID=2839</a>                                                                                                                                                                                                                                                                                                                                                                                                                                                       |
| Nevada | 19-Mar-20 | <a href="https://www.gov.ca.gov/wp-content/uploads/2020/03/3.19.20-attested-EO-N-33-20-COVID-19-HEALTH-ORDER.pdf">https://www.gov.ca.gov/wp-content/uploads/2020/03/3.19.20-attested-EO-N-33-20-COVID-19-HEALTH-ORDER.pdf</a>                                                                                                                                                                                                                                                                                                                                                         |
| Nevada | 24-Mar-20 | <a href="https://web.archive.org/web/20200330111420/https://www.mynevadacounty.com/CivicAlerts.aspx?AID=2856">https://web.archive.org/web/20200330111420/https://www.mynevadacounty.com/CivicAlerts.aspx?AID=2856</a>                                                                                                                                                                                                                                                                                                                                                                 |
| Nevada | 7-Apr-20  | <a href="https://web.archive.org/web/20200524095813/https://www.mynevadacounty.com/CivicAlerts.aspx?AID=2879">https://web.archive.org/web/20200524095813/https://www.mynevadacounty.com/CivicAlerts.aspx?AID=2879</a>                                                                                                                                                                                                                                                                                                                                                                 |
| Nevada | 7-Apr-20  | <a href="https://web.archive.org/web/20200524095813/https://www.mynevadacounty.com/CivicAlerts.aspx?AID=2879">https://web.archive.org/web/20200524095813/https://www.mynevadacounty.com/CivicAlerts.aspx?AID=2879</a>                                                                                                                                                                                                                                                                                                                                                                 |
| Nevada | 13-Apr-20 | <a href="https://www.mynevadacounty.com/CivicAlerts.aspx?AID=2891">https://www.mynevadacounty.com/CivicAlerts.aspx?AID=2891</a>                                                                                                                                                                                                                                                                                                                                                                                                                                                       |
| Nevada | 15-Apr-20 | <a href="https://web.archive.org/web/20200523234101/https://www.mynevadacounty.com/DocumentCenter/View/34027/PHO-Order-Stay-at-Home-April-15-002">https://web.archive.org/web/20200523234101/https://www.mynevadacounty.com/DocumentCenter/View/34027/PHO-Order-Stay-at-Home-April-15-002</a>                                                                                                                                                                                                                                                                                         |
| Nevada | 27-Apr-20 | <a href="https://web.archive.org/web/20200524095642/https://www.mynevadacounty.com/DocumentCenter/View/34152/42720-Order-with-Guidance-Documents">https://web.archive.org/web/20200524095642/https://www.mynevadacounty.com/DocumentCenter/View/34152/42720-Order-with-Guidance-Documents</a>                                                                                                                                                                                                                                                                                         |
| Nevada | 4-May-20  | <a href="https://www.mynevadacounty.com/CivicAlerts.aspx?AID=2987">https://www.mynevadacounty.com/CivicAlerts.aspx?AID=2987</a>                                                                                                                                                                                                                                                                                                                                                                                                                                                       |
| Nevada | 12-May-20 | <a href="https://www.mynevadacounty.com/CivicAlerts.aspx?AID=3010">https://www.mynevadacounty.com/CivicAlerts.aspx?AID=3010</a>                                                                                                                                                                                                                                                                                                                                                                                                                                                       |
| Nevada | 21-May-20 | <a href="https://www.mynevadacounty.com/DocumentCenter/View/34512/05-21-20-Revised-STR-Order---Signed?bidId=">https://www.mynevadacounty.com/DocumentCenter/View/34512/05-21-20-Revised-STR-Order---Signed?bidId=</a>                                                                                                                                                                                                                                                                                                                                                                 |
| Nevada | 27-May-20 | <a href="https://www.mynevadacounty.com/CivicAlerts.aspx?AID=3038">https://www.mynevadacounty.com/CivicAlerts.aspx?AID=3038</a>                                                                                                                                                                                                                                                                                                                                                                                                                                                       |
| Nevada | 12-Jun-20 | <a href="https://www.mynevadacounty.com/DocumentCenter/View/34027/PHO-Rescinds-Order-Stay-at-Home?bidId=">https://www.mynevadacounty.com/DocumentCenter/View/34027/PHO-Rescinds-Order-Stay-at-Home?bidId=</a>                                                                                                                                                                                                                                                                                                                                                                         |
| Nevada | 12-Jun-20 | <a href="https://www.mynevadacounty.com/CivicAlerts.aspx?AID=3069">https://www.mynevadacounty.com/CivicAlerts.aspx?AID=3069</a>                                                                                                                                                                                                                                                                                                                                                                                                                                                       |
| Nevada | 18-Jun-20 | <a href="https://www.cdph.ca.gov/Programs/CID/DCDC/CDPH%20Document%20Library/COVID-19/Guidance-for-Face-Coverings_06-18-2020.pdf">https://www.cdph.ca.gov/Programs/CID/DCDC/CDPH%20Document%20Library/COVID-19/Guidance-for-Face-Coverings_06-18-2020.pdf</a>                                                                                                                                                                                                                                                                                                                         |
| Nevada | 19-Jun-20 | <a href="https://www.8newsnow.com/news/local-news/california-to-allow-nail-salons-to-reopen-starting-june-19/">https://www.8newsnow.com/news/local-news/california-to-allow-nail-salons-to-reopen-starting-june-19/</a>                                                                                                                                                                                                                                                                                                                                                               |
| Nevada | 7-Jul-20  | <a href="https://www.mynevadacounty.com/DocumentCenter/View/33967/COVID-19-Quarantine-Order-Revised-July-9-2020?bidId=">https://www.mynevadacounty.com/DocumentCenter/View/33967/COVID-19-Quarantine-Order-Revised-July-9-2020?bidId=</a>                                                                                                                                                                                                                                                                                                                                             |
| Nevada | 8-Jul-20  | <a href="https://www.mynevadacounty.com/DocumentCenter/View/33968/COVID-19-Home-Isolation-Order-Revised-July-10-2020?bidId=">https://www.mynevadacounty.com/DocumentCenter/View/33968/COVID-19-Home-Isolation-Order-Revised-July-10-2020?bidId=</a>                                                                                                                                                                                                                                                                                                                                   |
| Nevada | 13-Jul-20 | <a href="https://www.mynevadacounty.com/CivicAlerts.aspx?AID=3137">https://www.mynevadacounty.com/CivicAlerts.aspx?AID=3137</a>                                                                                                                                                                                                                                                                                                                                                                                                                                                       |
| Nevada | 28-Aug-20 | <a href="https://projects.sfchronicle.com/2020/coronavirus-map/california-reopening/">https://projects.sfchronicle.com/2020/coronavirus-map/california-reopening/</a>                                                                                                                                                                                                                                                                                                                                                                                                                 |
| Nevada | 22-Sep-20 | <a href="https://www.mynevadacounty.com/CivicAlerts.aspx?AID=3268">https://www.mynevadacounty.com/CivicAlerts.aspx?AID=3268</a>                                                                                                                                                                                                                                                                                                                                                                                                                                                       |
| Nevada | 9-Oct-20  | <a href="https://wp.sbcounty.gov/cao/countywire/?p=9160#:~:text=Private%20outdoor%20gatherings%20of%20three%20households%20now%20allowed%20throughout%20the%20county%2C%20state,-Published%20October%209&amp;text=Private%20outdoor%20gatherings%20of%20people,Gavin%20Newsom%20on%20Friday.">https://wp.sbcounty.gov/cao/countywire/?p=9160#:~:text=Private%20outdoor%20gatherings%20of%20three%20households%20now%20allowed%20throughout%20the%20county%2C%20state,-Published%20October%209&amp;text=Private%20outdoor%20gatherings%20of%20people,Gavin%20Newsom%20on%20Friday.</a> |
| Nevada | 13-Nov-20 | <a href="https://www.cdph.ca.gov/Programs/CID/DCDC/Pages/COVID-19/Guidance-for-the-Prevention-of-COVID-19-Transmission-for-Gatherings-November-2020.aspx">https://www.cdph.ca.gov/Programs/CID/DCDC/Pages/COVID-19/Guidance-for-the-Prevention-of-COVID-19-Transmission-for-Gatherings-November-2020.aspx</a>                                                                                                                                                                                                                                                                         |
| Nevada | 16-Nov-20 | <a href="https://www.cdph.ca.gov/Programs/CID/DCDC/Pages/COVID-19/guidance-for-face-coverings.aspx">https://www.cdph.ca.gov/Programs/CID/DCDC/Pages/COVID-19/guidance-for-face-coverings.aspx</a>                                                                                                                                                                                                                                                                                                                                                                                     |
| Nevada | 17-Nov-20 | <a href="https://kmph.com/news/local/40-california-counties-in-purple-tier-including-the-central-valley">https://kmph.com/news/local/40-california-counties-in-purple-tier-including-the-central-valley</a>                                                                                                                                                                                                                                                                                                                                                                           |

|        |           |                                                                                                                                                                                                                                                                                                                                                                                                                                                                                             |
|--------|-----------|---------------------------------------------------------------------------------------------------------------------------------------------------------------------------------------------------------------------------------------------------------------------------------------------------------------------------------------------------------------------------------------------------------------------------------------------------------------------------------------------|
| Nevada | 19-Nov-20 | <a href="https://www.cdph.ca.gov/Programs/CID/DCDC/Pages/COVID-19/limited-stay-at-home-order.aspx">https://www.cdph.ca.gov/Programs/CID/DCDC/Pages/COVID-19/limited-stay-at-home-order.aspx</a>                                                                                                                                                                                                                                                                                             |
| Nevada | 9-Dec-20  | <a href="https://www.gov.ca.gov/wp-content/uploads/2020/12/12.3.20-Stay-at-Home-Order-ICU-Scenario.pdf">https://www.gov.ca.gov/wp-content/uploads/2020/12/12.3.20-Stay-at-Home-Order-ICU-Scenario.pdf</a>                                                                                                                                                                                                                                                                                   |
| Orange | 26-Feb-20 | <a href="https://www.latimes.com/socal/daily-pilot/news/story/2020-02-26/orange-county-declaring-a-local-emergency-about-coronavirus">https://www.latimes.com/socal/daily-pilot/news/story/2020-02-26/orange-county-declaring-a-local-emergency-about-coronavirus</a>                                                                                                                                                                                                                       |
| Orange | 17-Mar-20 | <a href="https://voiceofoc.org/wp-content/uploads/2020/03/OC-health-order-against-gatherings-issued-March-17-2020.pdf">https://voiceofoc.org/wp-content/uploads/2020/03/OC-health-order-against-gatherings-issued-March-17-2020.pdf</a>                                                                                                                                                                                                                                                     |
| Orange | 18-Mar-20 | <a href="https://1ccaxf2hhhh1jcwiktlicz7-wpengine.netdna-ssl.com/wp-content/uploads/2020/03/EOC-Press-Release-10-Amended-Order.pdf">https://1ccaxf2hhhh1jcwiktlicz7-wpengine.netdna-ssl.com/wp-content/uploads/2020/03/EOC-Press-Release-10-Amended-Order.pdf</a>                                                                                                                                                                                                                           |
| Orange | 19-Mar-20 | <a href="https://www.gov.ca.gov/wp-content/uploads/2020/03/3.19.20-attested-EO-N-33-20-COVID-19-HEALTH-ORDER.pdf">https://www.gov.ca.gov/wp-content/uploads/2020/03/3.19.20-attested-EO-N-33-20-COVID-19-HEALTH-ORDER.pdf</a>                                                                                                                                                                                                                                                               |
| Orange | 30-Mar-20 | <a href="https://www.cityoforange.org/DocumentCenter/View/10870/EOC-Health-order">https://www.cityoforange.org/DocumentCenter/View/10870/EOC-Health-order</a>                                                                                                                                                                                                                                                                                                                               |
| Orange | 9-Apr-20  | <a href="https://web.archive.org/web/20200420173158/https://ocovid19.ochealthinfo.com/article/oc-health-officers-orders-recommendations">https://web.archive.org/web/20200420173158/https://ocovid19.ochealthinfo.com/article/oc-health-officers-orders-recommendations</a>                                                                                                                                                                                                                 |
| Orange | 21-Apr-20 | <a href="https://www.ocregister.com/2020/04/21/coronavirus-orange-county-to-require-grocery-and-other-retail-workers-to-wear-masks/">https://www.ocregister.com/2020/04/21/coronavirus-orange-county-to-require-grocery-and-other-retail-workers-to-wear-masks/</a>                                                                                                                                                                                                                         |
| Orange | 30-Apr-20 | <a href="https://abc7.com/newsom-closes-beaches-california-beach-covid-19-coronavirus/6140014/">https://abc7.com/newsom-closes-beaches-california-beach-covid-19-coronavirus/6140014/</a>                                                                                                                                                                                                                                                                                                   |
| Orange | 6-May-20  | <a href="https://www.latimes.com/california/story/2020-05-06/beachgoers-rejoice-as-orange-countys-coastline-reopens-under-deal-with-newsom">https://www.latimes.com/california/story/2020-05-06/beachgoers-rejoice-as-orange-countys-coastline-reopens-under-deal-with-newsom</a>                                                                                                                                                                                                           |
| Orange | 22-May-20 | <a href="https://www.ocregister.com/2020/06/07/how-orange-county-leaders-could-resolve-raging-debate-over-coronavirus-mask-use/">https://www.ocregister.com/2020/06/07/how-orange-county-leaders-could-resolve-raging-debate-over-coronavirus-mask-use/</a>                                                                                                                                                                                                                                 |
| Orange | 22-May-20 | <a href="https://web.archive.org/web/20200527225010/https://ocovid19.ochealthinfo.com/article/oc-health-officers-orders-recommendations">https://web.archive.org/web/20200527225010/https://ocovid19.ochealthinfo.com/article/oc-health-officers-orders-recommendations</a>                                                                                                                                                                                                                 |
| Orange | 28-May-20 | <a href="https://web.archive.org/web/20200605123337/https://ocovid19.ochealthinfo.com/article/oc-health-officers-orders-recommendations">https://web.archive.org/web/20200605123337/https://ocovid19.ochealthinfo.com/article/oc-health-officers-orders-recommendations</a>                                                                                                                                                                                                                 |
| Orange | 11-Jun-20 | <a href="https://voiceofoc.org/2020/06/orange-county-officials-no-longer-require-masks-during-coronavirus-pandemic/">https://voiceofoc.org/2020/06/orange-county-officials-no-longer-require-masks-during-coronavirus-pandemic/</a>                                                                                                                                                                                                                                                         |
| Orange | 12-Jun-20 | <a href="https://web.archive.org/web/20200615145157/https://ocovid19.ochealthinfo.com/article/oc-health-officers-orders-recommendations">https://web.archive.org/web/20200615145157/https://ocovid19.ochealthinfo.com/article/oc-health-officers-orders-recommendations</a>                                                                                                                                                                                                                 |
| Orange | 18-Jun-20 | <a href="https://www.cdph.ca.gov/Programs/CID/DCDC/CDPH%20Document%20Library/COVID-19/Guidance-for-Face-Coverings_06-18-2020.pdf">https://www.cdph.ca.gov/Programs/CID/DCDC/CDPH%20Document%20Library/COVID-19/Guidance-for-Face-Coverings_06-18-2020.pdf</a>                                                                                                                                                                                                                               |
| Orange | 19-Jun-20 | <a href="https://web.archive.org/web/20200624034321/https://ocovid19.ochealthinfo.com/article/oc-health-officers-orders-recommendations">https://web.archive.org/web/20200624034321/https://ocovid19.ochealthinfo.com/article/oc-health-officers-orders-recommendations</a>                                                                                                                                                                                                                 |
| Orange | 1-Jul-20  | <a href="https://web.archive.org/web/20200701232206/https://ocovid19.ochealthinfo.com/article/oc-health-officers-orders-recommendations">https://web.archive.org/web/20200701232206/https://ocovid19.ochealthinfo.com/article/oc-health-officers-orders-recommendations</a>                                                                                                                                                                                                                 |
| Orange | 1-Jul-20  | <a href="https://mailchi.mp/ochca/sectorclosure">https://mailchi.mp/ochca/sectorclosure</a>                                                                                                                                                                                                                                                                                                                                                                                                 |
| Orange | 3-Jul-20  | <a href="https://ocovid19.ochealthinfo.com/acting-county-health-officer-issues-amended-orders-and-strong-recommendations-support-closures">https://ocovid19.ochealthinfo.com/acting-county-health-officer-issues-amended-orders-and-strong-recommendations-support-closures</a>                                                                                                                                                                                                             |
| Orange | 8-Jul-20  | <a href="https://voiceofoc.org/2020/07/county-postpones-youth-sports-activities-following-letter-from-oc-department-of-education/">https://voiceofoc.org/2020/07/county-postpones-youth-sports-activities-following-letter-from-oc-department-of-education/</a>                                                                                                                                                                                                                             |
| Orange | 13-Jul-20 | <a href="https://ocovid19.ochealthinfo.com/article/oc-health-officers-orders-recommendations">https://ocovid19.ochealthinfo.com/article/oc-health-officers-orders-recommendations</a>                                                                                                                                                                                                                                                                                                       |
| Orange | 17-Jul-20 | <a href="https://www.cdph.ca.gov/Programs/CID/DCDC/CDPH%20Document%20Library/COVID-19/Schools%20Reopening%20Recommendations.pdf">https://www.cdph.ca.gov/Programs/CID/DCDC/CDPH%20Document%20Library/COVID-19/Schools%20Reopening%20Recommendations.pdf</a>                                                                                                                                                                                                                                 |
| Orange | 28-Aug-20 | <a href="https://abc7news.com/ca-reopneing-phases-covid19cagov-gavin-newsom-update-california-salon-reopening/6393805/">https://abc7news.com/ca-reopneing-phases-covid19cagov-gavin-newsom-update-california-salon-reopening/6393805/</a>                                                                                                                                                                                                                                                   |
| Orange | 8-Sep-20  | <a href="https://ocovid19.ochealthinfo.com/article/oc-health-officers-orders-recommendations">https://ocovid19.ochealthinfo.com/article/oc-health-officers-orders-recommendations</a>                                                                                                                                                                                                                                                                                                       |
| Orange | 9-Oct-20  | <a href="https://www.cdph.ca.gov/Programs/CID/DCDC/Pages/COVID-19/CDPH-Guidance-for-the-Prevention-of-COVID-19-Transmission-for-Gatherings-10-09.aspx#:~:text=Gatherings%20that%20include%20more%20than,interact%20with%20stable%20over%20time.">https://www.cdph.ca.gov/Programs/CID/DCDC/Pages/COVID-19/CDPH-Guidance-for-the-Prevention-of-COVID-19-Transmission-for-Gatherings-10-09.aspx#:~:text=Gatherings%20that%20include%20more%20than,interact%20with%20stable%20over%20time.</a> |
| Orange | 13-Nov-20 | <a href="https://www.cdph.ca.gov/Programs/CID/DCDC/Pages/COVID-19/Guidance-for-the-Prevention-of-COVID-19-Transmission-for-Gatherings-November-2020.aspx">https://www.cdph.ca.gov/Programs/CID/DCDC/Pages/COVID-19/Guidance-for-the-Prevention-of-COVID-19-Transmission-for-Gatherings-November-2020.aspx</a>                                                                                                                                                                               |

|        |           |                                                                                                                                                                                                                                                                                                                                                                                                                                                                                                                                                                                       |
|--------|-----------|---------------------------------------------------------------------------------------------------------------------------------------------------------------------------------------------------------------------------------------------------------------------------------------------------------------------------------------------------------------------------------------------------------------------------------------------------------------------------------------------------------------------------------------------------------------------------------------|
| Orange | 16-Nov-20 | <a href="https://www.cdph.ca.gov/Programs/CID/DCDC/Pages/COVID-19/guidance-for-face-coverings.aspx">https://www.cdph.ca.gov/Programs/CID/DCDC/Pages/COVID-19/guidance-for-face-coverings.aspx</a>                                                                                                                                                                                                                                                                                                                                                                                     |
| Orange | 17-Nov-20 | <a href="https://kmp.com/news/local/40-california-counties-in-purple-tier-including-the-central-valley">https://kmp.com/news/local/40-california-counties-in-purple-tier-including-the-central-valley</a>                                                                                                                                                                                                                                                                                                                                                                             |
| Orange | 19-Nov-20 | <a href="https://www.cdph.ca.gov/Programs/CID/DCDC/Pages/COVID-19/limited-stay-at-home-order.aspx">https://www.cdph.ca.gov/Programs/CID/DCDC/Pages/COVID-19/limited-stay-at-home-order.aspx</a>                                                                                                                                                                                                                                                                                                                                                                                       |
| Orange | 20-Nov-20 | <a href="https://occovid19.ochealthinfo.com/article/oc-health-officers-orders-recommendations">https://occovid19.ochealthinfo.com/article/oc-health-officers-orders-recommendations</a>                                                                                                                                                                                                                                                                                                                                                                                               |
| Orange | 5-Dec-20  | <a href="https://voiceofoc.org/2020/12/state-orders-regional-shutdown-covering-orange-county-and-socal-as-coronavirus-hospitalizations-skyrocket/">https://voiceofoc.org/2020/12/state-orders-regional-shutdown-covering-orange-county-and-socal-as-coronavirus-hospitalizations-skyrocket/</a>                                                                                                                                                                                                                                                                                       |
| Orange | 17-Dec-20 | <a href="https://occovid19.ochealthinfo.com/article/oc-health-officers-orders-recommendations">https://occovid19.ochealthinfo.com/article/oc-health-officers-orders-recommendations</a>                                                                                                                                                                                                                                                                                                                                                                                               |
| Placer | 3-Mar-20  | <a href="https://www.placer.ca.gov/6437/Placer-County-confirms-second-case-of-CO">https://www.placer.ca.gov/6437/Placer-County-confirms-second-case-of-CO</a>                                                                                                                                                                                                                                                                                                                                                                                                                         |
| Placer | 10-Mar-20 | <a href="https://www.placer.ca.gov/6454/Recommend-COVID-19-mitigation">https://www.placer.ca.gov/6454/Recommend-COVID-19-mitigation</a>                                                                                                                                                                                                                                                                                                                                                                                                                                               |
| Placer | 16-Mar-20 | <a href="https://www.placer.ca.gov/6468/Placer-limits-counter-service">https://www.placer.ca.gov/6468/Placer-limits-counter-service</a>                                                                                                                                                                                                                                                                                                                                                                                                                                               |
| Placer | 19-Mar-20 | <a href="https://www.gov.ca.gov/wp-content/uploads/2020/03/3.19.20-attested-EO-N-33-20-COVID-19-HEALTH-ORDER.pdf">https://www.gov.ca.gov/wp-content/uploads/2020/03/3.19.20-attested-EO-N-33-20-COVID-19-HEALTH-ORDER.pdf</a>                                                                                                                                                                                                                                                                                                                                                         |
| Placer | 19-Mar-20 | <a href="https://www.placer.ca.gov/DocumentCenter/View/43269/PlacerCounty-COVID-19-Directive">https://www.placer.ca.gov/DocumentCenter/View/43269/PlacerCounty-COVID-19-Directive</a>                                                                                                                                                                                                                                                                                                                                                                                                 |
| Placer | 24-Mar-20 | <a href="https://www.placer.ca.gov/6493/COVID-19-clarity-for-short-term-rental-o">https://www.placer.ca.gov/6493/COVID-19-clarity-for-short-term-rental-o</a>                                                                                                                                                                                                                                                                                                                                                                                                                         |
| Placer | 3-Apr-20  | <a href="https://www.placer.ca.gov/6524/Face-coverings-now-recommended-for-publi">https://www.placer.ca.gov/6524/Face-coverings-now-recommended-for-publi</a>                                                                                                                                                                                                                                                                                                                                                                                                                         |
| Placer | 10-Apr-20 | <a href="https://www.placer.ca.gov/DocumentCenter/View/43731/COVID19-Health-Officer-Order-FINAL-41020-with-Appendix">https://www.placer.ca.gov/DocumentCenter/View/43731/COVID19-Health-Officer-Order-FINAL-41020-with-Appendix</a>                                                                                                                                                                                                                                                                                                                                                   |
| Placer | 16-Apr-20 | <a href="https://www.placer.ca.gov/DocumentCenter/View/43966/Amended-Health-Officer-Order-41620">https://www.placer.ca.gov/DocumentCenter/View/43966/Amended-Health-Officer-Order-41620</a>                                                                                                                                                                                                                                                                                                                                                                                           |
| Placer | 8-May-20  | <a href="https://www.placer.ca.gov/6594/Placer-submits-reopening-documents">https://www.placer.ca.gov/6594/Placer-submits-reopening-documents</a>                                                                                                                                                                                                                                                                                                                                                                                                                                     |
| Placer | 12-May-20 | <a href="https://www.placer.ca.gov/6596/Placer-receives-local-variance-from-stat">https://www.placer.ca.gov/6596/Placer-receives-local-variance-from-stat</a>                                                                                                                                                                                                                                                                                                                                                                                                                         |
| Placer | 25-May-20 | <a href="https://www.placer.ca.gov/6614/Placer-asks-to-move-to-Stage-3">https://www.placer.ca.gov/6614/Placer-asks-to-move-to-Stage-3</a>                                                                                                                                                                                                                                                                                                                                                                                                                                             |
| Placer | 26-May-20 | <a href="https://sacramento.cbslocal.com/2020/05/26/hair-salons-barbershops-reopen/">https://sacramento.cbslocal.com/2020/05/26/hair-salons-barbershops-reopen/</a>                                                                                                                                                                                                                                                                                                                                                                                                                   |
| Placer | 9-Jun-20  | <a href="https://www.placer.ca.gov/6645/Placer-moves-into-Stage-3">https://www.placer.ca.gov/6645/Placer-moves-into-Stage-3</a>                                                                                                                                                                                                                                                                                                                                                                                                                                                       |
| Placer | 18-Jun-20 | <a href="https://www.cdph.ca.gov/Programs/CID/DCDC/CDPH%20Document%20Library/COVID-19/Guidance-for-Face-Coverings_06-18-2020.pdf">https://www.cdph.ca.gov/Programs/CID/DCDC/CDPH%20Document%20Library/COVID-19/Guidance-for-Face-Coverings_06-18-2020.pdf</a>                                                                                                                                                                                                                                                                                                                         |
| Placer | 18-Jun-20 | <a href="https://www.rosevilletoday.com/news/roseville/open-placer-county-personal-care-services/">https://www.rosevilletoday.com/news/roseville/open-placer-county-personal-care-services/</a>                                                                                                                                                                                                                                                                                                                                                                                       |
| Placer | 11-Jul-20 | <a href="https://www.placer.ca.gov/6709/State-orders-several-business-to-close-i">https://www.placer.ca.gov/6709/State-orders-several-business-to-close-i</a>                                                                                                                                                                                                                                                                                                                                                                                                                         |
| Placer | 13-Jul-20 | <a href="https://www.latimes.com/california/story/2020-07-13/newsom-california-county-rollback-reopening-coronavirus">https://www.latimes.com/california/story/2020-07-13/newsom-california-county-rollback-reopening-coronavirus</a>                                                                                                                                                                                                                                                                                                                                                 |
| Placer | 28-Aug-20 | <a href="https://abc7news.com/ca-reopneing-phases-covid19cagov-gavin-newsom-update-california-salon-reopening/6393805/">https://abc7news.com/ca-reopneing-phases-covid19cagov-gavin-newsom-update-california-salon-reopening/6393805/</a>                                                                                                                                                                                                                                                                                                                                             |
| Placer | 8-Sep-20  | <a href="https://projects.sfchronicle.com/2020/coronavirus-map/california-reopening/">https://projects.sfchronicle.com/2020/coronavirus-map/california-reopening/</a>                                                                                                                                                                                                                                                                                                                                                                                                                 |
| Placer | 9-Oct-20  | <a href="https://wp.sbcounty.gov/cao/countywire/?p=9160#:~:text=Private%20outdoor%20gatherings%20of%20three%20households%20now%20allowed%20throughout%20the%20county%2C%20state,-Published%20October%209&amp;text=Private%20outdoor%20gatherings%20of%20people,Gavin%20Newsom%20on%20Friday.">https://wp.sbcounty.gov/cao/countywire/?p=9160#:~:text=Private%20outdoor%20gatherings%20of%20three%20households%20now%20allowed%20throughout%20the%20county%2C%20state,-Published%20October%209&amp;text=Private%20outdoor%20gatherings%20of%20people,Gavin%20Newsom%20on%20Friday.</a> |
| Placer | 13-Oct-20 | <a href="https://www.abc10.com/article/news/health/coronavirus/placer-county-businesses-welcome-relief-brought-with-new-orange-tier-status/103-17fe3d18-8331-4294-98c0-fab9b29f53ed">https://www.abc10.com/article/news/health/coronavirus/placer-county-businesses-welcome-relief-brought-with-new-orange-tier-status/103-17fe3d18-8331-4294-98c0-fab9b29f53ed</a>                                                                                                                                                                                                                   |

|        |           |                                                                                                                                                                                                                                                                                                                                                                                                                                                                                                                                                                                       |
|--------|-----------|---------------------------------------------------------------------------------------------------------------------------------------------------------------------------------------------------------------------------------------------------------------------------------------------------------------------------------------------------------------------------------------------------------------------------------------------------------------------------------------------------------------------------------------------------------------------------------------|
| Placer | 8-Nov-20  | <a href="https://www.abc10.com/article/news/health/coronavirus/coronavirus-numbers/placer-county-tier-status/103-220f1dc2-6b54-4d0a-b1e5-1bf5bff984af">https://www.abc10.com/article/news/health/coronavirus/coronavirus-numbers/placer-county-tier-status/103-220f1dc2-6b54-4d0a-b1e5-1bf5bff984af</a>                                                                                                                                                                                                                                                                               |
| Placer | 13-Nov-20 | <a href="https://www.cdph.ca.gov/Programs/CID/DCDC/Pages/COVID-19/Guidance-for-the-Prevention-of-COVID-19-Transmission-for-Gatherings-November-2020.aspx">https://www.cdph.ca.gov/Programs/CID/DCDC/Pages/COVID-19/Guidance-for-the-Prevention-of-COVID-19-Transmission-for-Gatherings-November-2020.aspx</a>                                                                                                                                                                                                                                                                         |
| Placer | 16-Nov-20 | <a href="https://www.cdph.ca.gov/Programs/CID/DCDC/Pages/COVID-19/guidance-for-face-coverings.aspx">https://www.cdph.ca.gov/Programs/CID/DCDC/Pages/COVID-19/guidance-for-face-coverings.aspx</a>                                                                                                                                                                                                                                                                                                                                                                                     |
| Placer | 17-Nov-20 | <a href="https://kmpb.com/news/local/40-california-counties-in-purple-tier-including-the-central-valley">https://kmpb.com/news/local/40-california-counties-in-purple-tier-including-the-central-valley</a>                                                                                                                                                                                                                                                                                                                                                                           |
| Placer | 19-Nov-20 | <a href="https://www.cdph.ca.gov/Programs/CID/DCDC/Pages/COVID-19/limited-stay-at-home-order.aspx">https://www.cdph.ca.gov/Programs/CID/DCDC/Pages/COVID-19/limited-stay-at-home-order.aspx</a>                                                                                                                                                                                                                                                                                                                                                                                       |
| Placer | 9-Dec-20  | <a href="https://www.gov.ca.gov/wp-content/uploads/2020/12/12.3.20-Stay-at-Home-Order-ICU-Scenario.pdf">https://www.gov.ca.gov/wp-content/uploads/2020/12/12.3.20-Stay-at-Home-Order-ICU-Scenario.pdf</a>                                                                                                                                                                                                                                                                                                                                                                             |
| Plumas | 16-Mar-20 | <a href="https://www.plumascounty.us/DocumentCenter/View/25702/31620-Declaration-of-Local-Health-Emergency-signed-by-MS-MD">https://www.plumascounty.us/DocumentCenter/View/25702/31620-Declaration-of-Local-Health-Emergency-signed-by-MS-MD</a>                                                                                                                                                                                                                                                                                                                                     |
| Plumas | 19-Mar-20 | <a href="https://www.gov.ca.gov/wp-content/uploads/2020/03/3.19.20-attested-EO-N-33-20-COVID-19-HEALTH-ORDER.pdf">https://www.gov.ca.gov/wp-content/uploads/2020/03/3.19.20-attested-EO-N-33-20-COVID-19-HEALTH-ORDER.pdf</a>                                                                                                                                                                                                                                                                                                                                                         |
| Plumas | 8-Apr-20  | <a href="https://www.plumascounty.us/DocumentCenter/View/25918/Guidance-for-Stay-Home-and-Non-essential-Travel-and-Self-Quarantine---DA_PCPHA_PCSO-FINAL">https://www.plumascounty.us/DocumentCenter/View/25918/Guidance-for-Stay-Home-and-Non-essential-Travel-and-Self-Quarantine---DA_PCPHA_PCSO-FINAL</a>                                                                                                                                                                                                                                                                         |
| Plumas | 6-May-20  | <a href="https://www.plumascounty.us/DocumentCenter/View/26176/PCPHA-Health-Officer-Order-Face-Covering-Final-Signature">https://www.plumascounty.us/DocumentCenter/View/26176/PCPHA-Health-Officer-Order-Face-Covering-Final-Signature</a>                                                                                                                                                                                                                                                                                                                                           |
| Plumas | 8-May-20  | <a href="https://www.plumascounty.us/DocumentCenter/View/26201/Plumas-Countys-Plan-for-Moving-Through-Stage-2">https://www.plumascounty.us/DocumentCenter/View/26201/Plumas-Countys-Plan-for-Moving-Through-Stage-2</a>                                                                                                                                                                                                                                                                                                                                                               |
| Plumas | 13-May-20 | <a href="https://www.plumascounty.us/DocumentCenter/View/26241/PCPHA-Health-Officer-Order-Face-Covering-Modified-Signature">https://www.plumascounty.us/DocumentCenter/View/26241/PCPHA-Health-Officer-Order-Face-Covering-Modified-Signature</a>                                                                                                                                                                                                                                                                                                                                     |
| Plumas | 15-May-20 | <a href="https://www.plumasnews.com/plumas-restaurants-and-retail-reopen-for-on-site-service/">https://www.plumasnews.com/plumas-restaurants-and-retail-reopen-for-on-site-service/</a>                                                                                                                                                                                                                                                                                                                                                                                               |
| Plumas | 26-May-20 | <a href="https://www.plumasnews.com/churches-and-hair-salons-to-reopen-in-plumas/">https://www.plumasnews.com/churches-and-hair-salons-to-reopen-in-plumas/</a>                                                                                                                                                                                                                                                                                                                                                                                                                       |
| Plumas | 2-Jun-20  | <a href="https://www.plumascounty.us/DocumentCenter/View/26327/20200602-Revised-Guidance-for-Staying-Home-FINAL">https://www.plumascounty.us/DocumentCenter/View/26327/20200602-Revised-Guidance-for-Staying-Home-FINAL</a>                                                                                                                                                                                                                                                                                                                                                           |
| Plumas | 6-Jun-20  | <a href="https://www.plumascounty.us/DocumentCenter/View/26364/20200605-PSA-State-Issues-Guidance-for-Stage-3-Businesses-and-Activites-FINAL">https://www.plumascounty.us/DocumentCenter/View/26364/20200605-PSA-State-Issues-Guidance-for-Stage-3-Businesses-and-Activites-FINAL</a>                                                                                                                                                                                                                                                                                                 |
| Plumas | 12-Jun-20 | <a href="https://www.plumascounty.us/DocumentCenter/View/26487/20200613-PSA-State-Issues-Guidance-to-Expand-Personal-Services-for-Stage-3-Businesses">https://www.plumascounty.us/DocumentCenter/View/26487/20200613-PSA-State-Issues-Guidance-to-Expand-Personal-Services-for-Stage-3-Businesses</a>                                                                                                                                                                                                                                                                                 |
| Plumas | 18-Jun-20 | <a href="https://www.cdph.ca.gov/Programs/CID/DCDC/CDPH%20Document%20Library/COVID-19/Guidance-for-Face-Coverings_06-18-2020.pdf">https://www.cdph.ca.gov/Programs/CID/DCDC/CDPH%20Document%20Library/COVID-19/Guidance-for-Face-Coverings_06-18-2020.pdf</a>                                                                                                                                                                                                                                                                                                                         |
| Plumas | 13-Jul-20 | <a href="https://www.latimes.com/california/story/2020-07-13/newsom-california-county-rollback-reopening-coronavirus">https://www.latimes.com/california/story/2020-07-13/newsom-california-county-rollback-reopening-coronavirus</a>                                                                                                                                                                                                                                                                                                                                                 |
| Plumas | 28-Aug-20 | <a href="https://www.plumasnews.com/plumas-county-lands-in-tier-3-on-governors-new-reopening-plan/">https://www.plumasnews.com/plumas-county-lands-in-tier-3-on-governors-new-reopening-plan/</a>                                                                                                                                                                                                                                                                                                                                                                                     |
| Plumas | 6-Oct-20  | <a href="https://www.abc10.com/article/news/health/coronavirus/coronavirus-numbers/el-dorado-plumas-yuba-county-coronavirus-tier-list-california/103-31994e3a-5e4e-472f-9fdf-ee639e0d5b20">https://www.abc10.com/article/news/health/coronavirus/coronavirus-numbers/el-dorado-plumas-yuba-county-coronavirus-tier-list-california/103-31994e3a-5e4e-472f-9fdf-ee639e0d5b20</a>                                                                                                                                                                                                       |
| Plumas | 9-Oct-20  | <a href="https://wp.sbcounty.gov/cao/countywire/?p=9160#:~:text=Private%20outdoor%20gatherings%20of%20three%20households%20now%20allowed%20throughout%20the%20county%2C%20state,-Published%20October%209&amp;text=Private%20outdoor%20gatherings%20of%20people,Gavin%20Newsom%20on%20Friday.">https://wp.sbcounty.gov/cao/countywire/?p=9160#:~:text=Private%20outdoor%20gatherings%20of%20three%20households%20now%20allowed%20throughout%20the%20county%2C%20state,-Published%20October%209&amp;text=Private%20outdoor%20gatherings%20of%20people,Gavin%20Newsom%20on%20Friday.</a> |
| Plumas | 4-Nov-20  | <a href="https://www.kcra.com/article/californias-covid-tiers-update-will-happen-nov-4/34564799">https://www.kcra.com/article/californias-covid-tiers-update-will-happen-nov-4/34564799</a>                                                                                                                                                                                                                                                                                                                                                                                           |
| Plumas | 13-Nov-20 | <a href="https://www.cdph.ca.gov/Programs/CID/DCDC/Pages/COVID-19/Guidance-for-the-Prevention-of-COVID-19-Transmission-for-Gatherings-November-2020.aspx">https://www.cdph.ca.gov/Programs/CID/DCDC/Pages/COVID-19/Guidance-for-the-Prevention-of-COVID-19-Transmission-for-Gatherings-November-2020.aspx</a>                                                                                                                                                                                                                                                                         |
| Plumas | 16-Nov-20 | <a href="https://www.cdph.ca.gov/Programs/CID/DCDC/Pages/COVID-19/guidance-for-face-coverings.aspx">https://www.cdph.ca.gov/Programs/CID/DCDC/Pages/COVID-19/guidance-for-face-coverings.aspx</a>                                                                                                                                                                                                                                                                                                                                                                                     |
| Plumas | 17-Nov-20 | <a href="https://kmpb.com/news/local/40-california-counties-in-purple-tier-including-the-central-valley">https://kmpb.com/news/local/40-california-counties-in-purple-tier-including-the-central-valley</a>                                                                                                                                                                                                                                                                                                                                                                           |
| Plumas | 28-Nov-20 | <a href="https://www.plumascounty.us/DocumentCenter/View/28626/20201128-PSA-Plumas-County-moves-to-Purple-Tier-FINAL">https://www.plumascounty.us/DocumentCenter/View/28626/20201128-PSA-Plumas-County-moves-to-Purple-Tier-FINAL</a>                                                                                                                                                                                                                                                                                                                                                 |
| Plumas | 9-Dec-20  | <a href="https://www.gov.ca.gov/wp-content/uploads/2020/12/12.3.20-Stay-at-Home-Order-ICU-Scenario.pdf">https://www.gov.ca.gov/wp-content/uploads/2020/12/12.3.20-Stay-at-Home-Order-ICU-Scenario.pdf</a>                                                                                                                                                                                                                                                                                                                                                                             |

|           |           |                                                                                                                                                                                                                                                                                                                                                                                                                                             |
|-----------|-----------|---------------------------------------------------------------------------------------------------------------------------------------------------------------------------------------------------------------------------------------------------------------------------------------------------------------------------------------------------------------------------------------------------------------------------------------------|
| Riverside | 30-Jan-20 | <a href="https://www.rivcoph.org/Portals/0/Coronavirus%20update%201.30.20.pdf?ver=2020-01-30-111343-893">https://www.rivcoph.org/Portals/0/Coronavirus%20update%201.30.20.pdf?ver=2020-01-30-111343-893</a>                                                                                                                                                                                                                                 |
| Riverside | 8-Mar-20  | <a href="https://www.rivcoph.org/Portals/0/3-8-2020_Public_Health_Emergency.pdf">https://www.rivcoph.org/Portals/0/3-8-2020_Public_Health_Emergency.pdf</a>                                                                                                                                                                                                                                                                                 |
| Riverside | 10-Mar-20 | <a href="https://www.rivcoph.org/Portals/0/Documents/CoronaVirus/kaiser_order.pdf">https://www.rivcoph.org/Portals/0/Documents/CoronaVirus/kaiser_order.pdf</a>                                                                                                                                                                                                                                                                             |
| Riverside | 12-Mar-20 | <a href="https://www.rivcoph.org/Portals/0/Documents/CoronaVirus/FILE_7803.pdf">https://www.rivcoph.org/Portals/0/Documents/CoronaVirus/FILE_7803.pdf</a>                                                                                                                                                                                                                                                                                   |
| Riverside | 13-Mar-20 | <a href="https://www.rivcoph.org/Portals/0/Documents/CoronaVirus/31320Schoolclosurenewsrelease.pdf">https://www.rivcoph.org/Portals/0/Documents/CoronaVirus/31320Schoolclosurenewsrelease.pdf</a>                                                                                                                                                                                                                                           |
| Riverside | 14-Mar-20 | <a href="https://www.rivcoph.org/Portals/0/Documents/CoronaVirus/DayCare.pdf">https://www.rivcoph.org/Portals/0/Documents/CoronaVirus/DayCare.pdf</a>                                                                                                                                                                                                                                                                                       |
| Riverside | 16-Mar-20 | <a href="https://www.rivcoph.org/Portals/0/Documents/CoronaVirus/SharpMFD_20200316.pdf">https://www.rivcoph.org/Portals/0/Documents/CoronaVirus/SharpMFD_20200316.pdf</a>                                                                                                                                                                                                                                                                   |
| Riverside | 17-Mar-20 | <a href="https://www.rivcoph.org/Portals/0/Documents/CoronaVirus/31720Countyofficesclosed.pdf">https://www.rivcoph.org/Portals/0/Documents/CoronaVirus/31720Countyofficesclosed.pdf</a>                                                                                                                                                                                                                                                     |
| Riverside | 18-Mar-20 | <a href="https://www.rivcoph.org/Portals/0/Documents/CoronaVirus/MessagetoFoodfacilitiesregardingoccupancy.pdf">https://www.rivcoph.org/Portals/0/Documents/CoronaVirus/MessagetoFoodfacilitiesregardingoccupancy.pdf</a>                                                                                                                                                                                                                   |
| Riverside | 19-Mar-20 | <a href="https://www.gov.ca.gov/wp-content/uploads/2020/03/3.19.20-attested-EO-N-33-20-COVID-19-HEALTH-ORDER.pdf">https://www.gov.ca.gov/wp-content/uploads/2020/03/3.19.20-attested-EO-N-33-20-COVID-19-HEALTH-ORDER.pdf</a>                                                                                                                                                                                                               |
| Riverside | 27-Mar-20 | <a href="https://www.rivcoph.org/Portals/0/Documents/CoronaVirus/3.27.20%20short%20term%20rental%20order.pdf?ver=2020-03-27-142950-717&amp;timestamp=1585344596380">https://www.rivcoph.org/Portals/0/Documents/CoronaVirus/3.27.20%20short%20term%20rental%20order.pdf?ver=2020-03-27-142950-717&amp;timestamp=1585344596380</a>                                                                                                           |
| Riverside | 31-Mar-20 | <a href="https://www.rivcoph.org/Portals/0/Documents/CoronaVirus/3.31.20%20Cover%20the%20face.pdf?ver=2020-03-31-153911-673&amp;timestamp=1585694356072">https://www.rivcoph.org/Portals/0/Documents/CoronaVirus/3.31.20%20Cover%20the%20face.pdf?ver=2020-03-31-153911-673&amp;timestamp=1585694356072</a>                                                                                                                                 |
| Riverside | 1-Apr-20  | <a href="https://www.rivcoph.org/Portals/0/Documents/CoronaVirus/4.1.20_RV_news_release.pdf?ver=2020-04-01-191108-617&amp;timestamp=1585793565007">https://www.rivcoph.org/Portals/0/Documents/CoronaVirus/4.1.20_RV_news_release.pdf?ver=2020-04-01-191108-617&amp;timestamp=1585793565007</a>                                                                                                                                             |
| Riverside | 2-Apr-20  | <a href="https://www.rivcoph.org/Portals/0/Documents/CoronaVirus/4.2.20_School_closure_news_release.pdf?ver=2020-04-02-105537-177&amp;timestamp=1585850157471">https://www.rivcoph.org/Portals/0/Documents/CoronaVirus/4.2.20_School_closure_news_release.pdf?ver=2020-04-02-105537-177&amp;timestamp=1585850157471</a>                                                                                                                     |
| Riverside | 2-Apr-20  | <a href="https://www.rivcoph.org/Portals/0/Documents/CoronaVirus/4220Golfcoursesclosed.pdf?ver=2020-04-02-165307-550&amp;timestamp=1585871620617">https://www.rivcoph.org/Portals/0/Documents/CoronaVirus/4220Golfcoursesclosed.pdf?ver=2020-04-02-165307-550&amp;timestamp=1585871620617</a>                                                                                                                                               |
| Riverside | 3-Apr-20  | <a href="https://www.rivcoph.org/Portals/0/Documents/CoronaVirus/Riv-EOC_20200403_093140.pdf?ver=2020-04-03-111731-413&amp;timestamp=1585937891846">https://www.rivcoph.org/Portals/0/Documents/CoronaVirus/Riv-EOC_20200403_093140.pdf?ver=2020-04-03-111731-413&amp;timestamp=1585937891846</a>                                                                                                                                           |
| Riverside | 4-Apr-20  | <a href="https://www.rivcoph.org/Portals/0/Documents/CoronaVirus/April/4.4.20_HO_order_face_coverings.pdf?ver=2020-04-04-172943-200&amp;timestamp=1586046633879">https://www.rivcoph.org/Portals/0/Documents/CoronaVirus/April/4.4.20_HO_order_face_coverings.pdf?ver=2020-04-04-172943-200&amp;timestamp=1586046633879</a>                                                                                                                 |
| Riverside | 6-Apr-20  | <a href="https://www.rivcoph.org/Portals/0/Documents/CoronaVirus/April/News/4620shorttermlodgingextensiontoJune19.pdf?ver=2020-04-06-171747-380&amp;timestamp=1586218672278">https://www.rivcoph.org/Portals/0/Documents/CoronaVirus/April/News/4620shorttermlodgingextensiontoJune19.pdf?ver=2020-04-06-171747-380&amp;timestamp=1586218672278</a>                                                                                         |
| Riverside | 10-Apr-20 | <a href="https://www.rivcoph.org/Portals/0/Documents/CoronaVirus/April/News/April_10.pdf?ver=2020-04-11-105351-463&amp;timestamp=1586627749323">https://www.rivcoph.org/Portals/0/Documents/CoronaVirus/April/News/April_10.pdf?ver=2020-04-11-105351-463&amp;timestamp=1586627749323</a>                                                                                                                                                   |
| Riverside | 20-Apr-20 | <a href="https://www.rivcoph.org/Portals/0/Documents/CoronaVirus/April/News/4.20.20_golf_reopened_with_restrictions.pdf?ver=2020-04-20-165910-117&amp;timestamp=1587427206024">https://www.rivcoph.org/Portals/0/Documents/CoronaVirus/April/News/4.20.20_golf_reopened_with_restrictions.pdf?ver=2020-04-20-165910-117&amp;timestamp=1587427206024</a>                                                                                     |
| Riverside | 29-Apr-20 | <a href="https://www.rivcoph.org/Portals/0/Documents/CoronaVirus/April/PHOrders/PHO_Order_Stay_at_Home_Order_5.1.20.pdf?ver=2020-04-29-140642-993&amp;timestamp=1588194829599">https://www.rivcoph.org/Portals/0/Documents/CoronaVirus/April/PHOrders/PHO_Order_Stay_at_Home_Order_5.1.20.pdf?ver=2020-04-29-140642-993&amp;timestamp=1588194829599</a>                                                                                     |
| Riverside | 6-May-20  | <a href="https://www.rivcoph.org/Portals/0/Documents/CoronaVirus/May/News/5.6.20%20pool%20guidelines%20news%20release.pdf?ver=2020-05-06-154326-803&amp;timestamp=1588805036539">https://www.rivcoph.org/Portals/0/Documents/CoronaVirus/May/News/5.6.20%20pool%20guidelines%20news%20release.pdf?ver=2020-05-06-154326-803&amp;timestamp=1588805036539</a>                                                                                 |
| Riverside | 7-May-20  | <a href="https://www.rivcoph.org/Portals/0/Documents/CoronaVirus/May/News/5.7.20_biz_opening_news_release.pdf?ver=2020-05-08-091415-380&amp;timestamp=1588954458521">https://www.rivcoph.org/Portals/0/Documents/CoronaVirus/May/News/5.7.20_biz_opening_news_release.pdf?ver=2020-05-08-091415-380&amp;timestamp=1588954458521</a>                                                                                                         |
| Riverside | 8-May-20  | <a href="https://www.rivcoph.org/Portals/0/Documents/CoronaVirus/May/News/May_8_news.pdf?ver=2020-05-09-073616-897&amp;timestamp=1589035018474">https://www.rivcoph.org/Portals/0/Documents/CoronaVirus/May/News/May_8_news.pdf?ver=2020-05-09-073616-897&amp;timestamp=1589035018474</a>                                                                                                                                                   |
| Riverside | 21-May-20 | <a href="https://www.rivcoph.org/Portals/0/Documents/CoronaVirus/May/News/Riverside%20County%20progresses%20toward%20re-opening.pdf?ver=2020-05-22-155933-353&amp;timestamp=1590188379863">https://www.rivcoph.org/Portals/0/Documents/CoronaVirus/May/News/Riverside%20County%20progresses%20toward%20re-opening.pdf?ver=2020-05-22-155933-353&amp;timestamp=1590188379863</a>                                                             |
| Riverside | 26-May-20 | <a href="https://rivcoph.org/Portals/0/Documents/CoronaVirus/May/News/5.26.20_hair_salons_news_release_2.pdf?ver=2020-05-26-171857-070&amp;timestamp=1590538773739">https://rivcoph.org/Portals/0/Documents/CoronaVirus/May/News/5.26.20_hair_salons_news_release_2.pdf?ver=2020-05-26-171857-070&amp;timestamp=1590538773739</a>                                                                                                           |
| Riverside | 10-Jun-20 | <a href="https://www.pe.com/2020/06/10/riverside-county-bars-hotels-gyms-movie-theaters-can-reopen/">https://www.pe.com/2020/06/10/riverside-county-bars-hotels-gyms-movie-theaters-can-reopen/</a>                                                                                                                                                                                                                                         |
| Riverside | 17-Jun-20 | <a href="https://www.pe.com/2020/06/17/riverside-county-nail-salons-tattoo-shops-can-reopen-june-19/#:~:text=Personal%20care%20businesses%2C%20including%20nail,reopenings%20from%20novel%20coronavirus%20restrictions.">https://www.pe.com/2020/06/17/riverside-county-nail-salons-tattoo-shops-can-reopen-june-19/#:~:text=Personal%20care%20businesses%2C%20including%20nail,reopenings%20from%20novel%20coronavirus%20restrictions.</a> |

|            |           |                                                                                                                                                                                                                                                                                                                                                                                                                                                                                             |
|------------|-----------|---------------------------------------------------------------------------------------------------------------------------------------------------------------------------------------------------------------------------------------------------------------------------------------------------------------------------------------------------------------------------------------------------------------------------------------------------------------------------------------------|
| Riverside  | 18-Jun-20 | <a href="https://www.cdph.ca.gov/Programs/CID/DCDC/CDPH%20Document%20Library/COVID-19/Guidance-for-Face-Coverings_06-18-2020.pdf">https://www.cdph.ca.gov/Programs/CID/DCDC/CDPH%20Document%20Library/COVID-19/Guidance-for-Face-Coverings_06-18-2020.pdf</a>                                                                                                                                                                                                                               |
| Riverside  | 29-Jun-20 | <a href="https://www.rivcoph.org/Portals/0/Documents/CoronaVirus/June/PHOrders/ORDER_CLOSING_ALL_BREWPUBS_BARS_AND_PUBS_FINAL_signed.PDF?ver=2020-06-29-150220-000&amp;timestamp=1593468180829">https://www.rivcoph.org/Portals/0/Documents/CoronaVirus/June/PHOrders/ORDER_CLOSING_ALL_BREWPUBS_BARS_AND_PUBS_FINAL_signed.PDF?ver=2020-06-29-150220-000&amp;timestamp=1593468180829</a>                                                                                                   |
| Riverside  | 1-Jul-20  | <a href="https://www.cdph.ca.gov/Programs/OPA/Pages/NR20-143.aspx">https://www.cdph.ca.gov/Programs/OPA/Pages/NR20-143.aspx</a>                                                                                                                                                                                                                                                                                                                                                             |
| Riverside  | 7-Jul-20  | <a href="https://www.countyofriverside.us/NewsHighlights/TabId/96/ArtMID/487/ArticleID/516/Health-officials-need-cooperation-with-contact-tracers.aspx#gsc.tab=0">https://www.countyofriverside.us/NewsHighlights/TabId/96/ArtMID/487/ArticleID/516/Health-officials-need-cooperation-with-contact-tracers.aspx#gsc.tab=0</a>                                                                                                                                                               |
| Riverside  | 13-Jul-20 | <a href="https://www.cdph.ca.gov/Programs/OPA/Pages/NR20-158.aspx">https://www.cdph.ca.gov/Programs/OPA/Pages/NR20-158.aspx</a>                                                                                                                                                                                                                                                                                                                                                             |
| Riverside  | 13-Jul-20 | <a href="https://www.latimes.com/california/story/2020-07-13/newsom-california-county-rollback-reopening-coronavirus">https://www.latimes.com/california/story/2020-07-13/newsom-california-county-rollback-reopening-coronavirus</a>                                                                                                                                                                                                                                                       |
| Riverside  | 17-Jul-20 | <a href="https://www.cdph.ca.gov/Programs/CID/DCDC/CDPH%20Document%20Library/COVID-19/Schools%20Reopening%20Recommendations.pdf">https://www.cdph.ca.gov/Programs/CID/DCDC/CDPH%20Document%20Library/COVID-19/Schools%20Reopening%20Recommendations.pdf</a>                                                                                                                                                                                                                                 |
| Riverside  | 28-Aug-20 | <a href="https://abc7news.com/ca-reopneing-phases-covid19cagov-gavin-newsom-update-california-salon-reopening/6393805/">https://abc7news.com/ca-reopneing-phases-covid19cagov-gavin-newsom-update-california-salon-reopening/6393805/</a>                                                                                                                                                                                                                                                   |
| Riverside  | 22-Sep-20 | <a href="https://projects.sfchronicle.com/2020/coronavirus-map/california-reopening/">https://projects.sfchronicle.com/2020/coronavirus-map/california-reopening/</a>                                                                                                                                                                                                                                                                                                                       |
| Riverside  | 9-Oct-20  | <a href="https://www.cdph.ca.gov/Programs/CID/DCDC/Pages/COVID-19/CDPH-Guidance-for-the-Prevention-of-COVID-19-Transmission-for-Gatherings-10-09.aspx#:~:text=Gatherings%20that%20include%20more%20than,interact%20with%20stable%20over%20time.">https://www.cdph.ca.gov/Programs/CID/DCDC/Pages/COVID-19/CDPH-Guidance-for-the-Prevention-of-COVID-19-Transmission-for-Gatherings-10-09.aspx#:~:text=Gatherings%20that%20include%20more%20than,interact%20with%20stable%20over%20time.</a> |
| Riverside  | 20-Oct-20 | <a href="https://www.rivcoph.org/Portals/0/Documents/CoronaVirus/October/News/10.20.20_moving_back_to_purple_2.pdf?ver=2020-10-20-124311-007&amp;timestamp=1603222997998">https://www.rivcoph.org/Portals/0/Documents/CoronaVirus/October/News/10.20.20_moving_back_to_purple_2.pdf?ver=2020-10-20-124311-007&amp;timestamp=1603222997998</a>                                                                                                                                               |
| Riverside  | 16-Nov-20 | <a href="https://www.cdph.ca.gov/Programs/CID/DCDC/Pages/COVID-19/guidance-for-face-coverings.aspx">https://www.cdph.ca.gov/Programs/CID/DCDC/Pages/COVID-19/guidance-for-face-coverings.aspx</a>                                                                                                                                                                                                                                                                                           |
| Riverside  | 19-Nov-20 | <a href="https://www.cdph.ca.gov/Programs/CID/DCDC/Pages/COVID-19/limited-stay-at-home-order.aspx">https://www.cdph.ca.gov/Programs/CID/DCDC/Pages/COVID-19/limited-stay-at-home-order.aspx</a>                                                                                                                                                                                                                                                                                             |
| Riverside  | 5-Dec-20  | <a href="https://www.gov.ca.gov/wp-content/uploads/2020/12/12.3.20-Stay-at-Home-Order-ICU-Scenario.pdf">https://www.gov.ca.gov/wp-content/uploads/2020/12/12.3.20-Stay-at-Home-Order-ICU-Scenario.pdf</a>                                                                                                                                                                                                                                                                                   |
| Sacramento | 5-Mar-20  | <a href="https://www.saccounty.net/COVID-19/Documents/Small%20Biz%20resources/Proclamation%20of%20PH%20Emergency.PDF">https://www.saccounty.net/COVID-19/Documents/Small%20Biz%20resources/Proclamation%20of%20PH%20Emergency.PDF</a>                                                                                                                                                                                                                                                       |
| Sacramento | 15-Mar-20 | <a href="https://www.saccounty.net/COVID-19/Documents/Statement%20on%20mitigation%20strategy%203.15.pdf">https://www.saccounty.net/COVID-19/Documents/Statement%20on%20mitigation%20strategy%203.15.pdf</a>                                                                                                                                                                                                                                                                                 |
| Sacramento | 19-Mar-20 | <a href="https://www.gov.ca.gov/wp-content/uploads/2020/03/3.19.20-attested-EO-N-33-20-COVID-19-HEALTH-ORDER.pdf">https://www.gov.ca.gov/wp-content/uploads/2020/03/3.19.20-attested-EO-N-33-20-COVID-19-HEALTH-ORDER.pdf</a>                                                                                                                                                                                                                                                               |
| Sacramento | 19-Mar-20 | <a href="https://www.saccounty.net/COVID-19/Documents/20200319_HO_Signed_Stay_at_Home_Order.pdf">https://www.saccounty.net/COVID-19/Documents/20200319_HO_Signed_Stay_at_Home_Order.pdf</a>                                                                                                                                                                                                                                                                                                 |
| Sacramento | 7-Apr-20  | <a href="https://www.saccounty.net/COVID-19/Documents/April7_ExecutedHealthOrder_SignedNewStayathomeOrder-FINAL.pdf">https://www.saccounty.net/COVID-19/Documents/April7_ExecutedHealthOrder_SignedNewStayathomeOrder-FINAL.pdf</a>                                                                                                                                                                                                                                                         |
| Sacramento | 1-May-20  | <a href="https://www.saccounty.net/COVID-19/Documents/May1_ExecutedHealthOrder_SignedNewStayathomeOrder-FINAL.pdf">https://www.saccounty.net/COVID-19/Documents/May1_ExecutedHealthOrder_SignedNewStayathomeOrder-FINAL.pdf</a>                                                                                                                                                                                                                                                             |
| Sacramento | 22-May-20 | <a href="https://www.saccounty.net/COVID-19/Documents/2020-05-22%20Health%20Order%20Stay%20at%20Home%20SIGNED.pdf">https://www.saccounty.net/COVID-19/Documents/2020-05-22%20Health%20Order%20Stay%20at%20Home%20SIGNED.pdf</a>                                                                                                                                                                                                                                                             |
| Sacramento | 26-May-20 | <a href="https://www.saccounty.net/COVID-19/Documents/2020-05-26%20Health%20Order%20Stay%20at%20Home%20May%2026%2c%202020%20SIGNED.pdf">https://www.saccounty.net/COVID-19/Documents/2020-05-26%20Health%20Order%20Stay%20at%20Home%20May%2026%2c%202020%20SIGNED.pdf</a>                                                                                                                                                                                                                   |
| Sacramento | 12-Jun-20 | <a href="https://www.saccounty.net/COVID-19/Documents/2020-06-12-HealthOrderStayatHome-SIGNED.pdf">https://www.saccounty.net/COVID-19/Documents/2020-06-12-HealthOrderStayatHome-SIGNED.pdf</a>                                                                                                                                                                                                                                                                                             |
| Sacramento | 18-Jun-20 | <a href="https://www.cdph.ca.gov/Programs/CID/DCDC/CDPH%20Document%20Library/COVID-19/Guidance-for-Face-Coverings_06-18-2020.pdf">https://www.cdph.ca.gov/Programs/CID/DCDC/CDPH%20Document%20Library/COVID-19/Guidance-for-Face-Coverings_06-18-2020.pdf</a>                                                                                                                                                                                                                               |
| Sacramento | 19-Jun-20 | <a href="https://www.saccounty.net/COVID-19/Documents/2020-06-19%20-%20Health%20Order%20Stay%20at%20Home%20-%20signed.pdf">https://www.saccounty.net/COVID-19/Documents/2020-06-19%20-%20Health%20Order%20Stay%20at%20Home%20-%20signed.pdf</a>                                                                                                                                                                                                                                             |
| Sacramento | 29-Jun-20 | <a href="https://www.saccounty.net/COVID-19/Documents/2020-06-29-HO-StayatHome.pdf">https://www.saccounty.net/COVID-19/Documents/2020-06-29-HO-StayatHome.pdf</a>                                                                                                                                                                                                                                                                                                                           |
| Sacramento | 1-Jul-20  | <a href="https://www.saccounty.net/COVID-19/Documents/7%202020%20Public%20Health%20Order.pdf">https://www.saccounty.net/COVID-19/Documents/7%202020%20Public%20Health%20Order.pdf</a>                                                                                                                                                                                                                                                                                                       |

|            |           |                                                                                                                                                                                                                                                                                                                                                                                                                                                                                                                                                                                       |
|------------|-----------|---------------------------------------------------------------------------------------------------------------------------------------------------------------------------------------------------------------------------------------------------------------------------------------------------------------------------------------------------------------------------------------------------------------------------------------------------------------------------------------------------------------------------------------------------------------------------------------|
| Sacramento | 13-Jul-20 | <a href="https://www.latimes.com/california/story/2020-07-13/newsom-california-county-rollback-reopening-coronavirus">https://www.latimes.com/california/story/2020-07-13/newsom-california-county-rollback-reopening-coronavirus</a>                                                                                                                                                                                                                                                                                                                                                 |
| Sacramento | 14-Jul-20 | <a href="https://www.saccounty.net/COVID-19/Documents/2020-07-14_StayatHomeOrder.pdf">https://www.saccounty.net/COVID-19/Documents/2020-07-14_StayatHomeOrder.pdf</a>                                                                                                                                                                                                                                                                                                                                                                                                                 |
| Sacramento | 17-Jul-20 | <a href="https://www.cdph.ca.gov/Programs/CID/DCDC/CDPH%20Document%20Library/COVID-19/Schools%20Reopening%20Recommendations.pdf">https://www.cdph.ca.gov/Programs/CID/DCDC/CDPH%20Document%20Library/COVID-19/Schools%20Reopening%20Recommendations.pdf</a>                                                                                                                                                                                                                                                                                                                           |
| Sacramento | 20-Aug-20 | <a href="https://www.saccounty.net/COVID-19/Documents/Ordered%20Closure%20of%20Schools%20in%20Sacramento%20County%20-%202020-2020.pdf">https://www.saccounty.net/COVID-19/Documents/Ordered%20Closure%20of%20Schools%20in%20Sacramento%20County%20-%202020-2020.pdf</a>                                                                                                                                                                                                                                                                                                               |
| Sacramento | 28-Aug-20 | <a href="https://www.saccounty.net/COVID-19/Documents/Ordered%20Closure%20of%20Schools%20in%20Sacramento%20County%20-%202020-28-2020.pdf">https://www.saccounty.net/COVID-19/Documents/Ordered%20Closure%20of%20Schools%20in%20Sacramento%20County%20-%202020-28-2020.pdf</a>                                                                                                                                                                                                                                                                                                         |
| Sacramento | 28-Aug-20 | <a href="https://abc7news.com/ca-reopneing-phases-covid19cagov-gavin-newsom-update-california-salon-reopening/6393805/">https://abc7news.com/ca-reopneing-phases-covid19cagov-gavin-newsom-update-california-salon-reopening/6393805/</a>                                                                                                                                                                                                                                                                                                                                             |
| Sacramento | 31-Aug-20 | <a href="https://www.saccounty.net/COVID-19/Documents/2020-08-31_Sacramento_County_Health_Order.pdf">https://www.saccounty.net/COVID-19/Documents/2020-08-31_Sacramento_County_Health_Order.pdf</a>                                                                                                                                                                                                                                                                                                                                                                                   |
| Sacramento | 22-Sep-20 | <a href="https://files.covid19.ca.gov/pdf/guidance-expanded-personal-care-services--en.pdf">https://files.covid19.ca.gov/pdf/guidance-expanded-personal-care-services--en.pdf</a>                                                                                                                                                                                                                                                                                                                                                                                                     |
| Sacramento | 23-Sep-20 | <a href="https://www.saccounty.net/COVID-19/Documents/20201013_Sacramento_County_Health_Order.pdf">https://www.saccounty.net/COVID-19/Documents/20201013_Sacramento_County_Health_Order.pdf</a>                                                                                                                                                                                                                                                                                                                                                                                       |
| Sacramento | 29-Sep-20 | <a href="https://www.saccounty.net/news/latest-news/Pages/Lowering-Risk-New-SacCounty-Red-Tier-Health-Order.aspx">https://www.saccounty.net/news/latest-news/Pages/Lowering-Risk-New-SacCounty-Red-Tier-Health-Order.aspx</a>                                                                                                                                                                                                                                                                                                                                                         |
| Sacramento | 9-Oct-20  | <a href="https://wp.sbcounty.gov/cao/countywire/?p=9160#:~:text=Private%20outdoor%20gatherings%20of%20three%20households%20now%20allowed%20throughout%20the%20county%2C%20state,-Published%20October%209&amp;text=Private%20outdoor%20gatherings%20of%20people,Gavin%20Newsom%20on%20Friday.">https://wp.sbcounty.gov/cao/countywire/?p=9160#:~:text=Private%20outdoor%20gatherings%20of%20three%20households%20now%20allowed%20throughout%20the%20county%2C%20state,-Published%20October%209&amp;text=Private%20outdoor%20gatherings%20of%20people,Gavin%20Newsom%20on%20Friday.</a> |
| Sacramento | 13-Oct-20 | <a href="https://www.saccounty.net/COVID-19/Documents/20201013_Sacramento_County_Health_Order.pdf">https://www.saccounty.net/COVID-19/Documents/20201013_Sacramento_County_Health_Order.pdf</a>                                                                                                                                                                                                                                                                                                                                                                                       |
| Sacramento | 10-Nov-20 | <a href="https://www.latimes.com/california/story/2020-11-10/california-coronavirus-cases-climb-more-counties-expected-strict-reopenings">https://www.latimes.com/california/story/2020-11-10/california-coronavirus-cases-climb-more-counties-expected-strict-reopenings</a>                                                                                                                                                                                                                                                                                                         |
| Sacramento | 13-Nov-20 | <a href="https://www.saccounty.net/COVID-19/Documents/20201113_Sacramento_County_Health_Order.pdf">https://www.saccounty.net/COVID-19/Documents/20201113_Sacramento_County_Health_Order.pdf</a>                                                                                                                                                                                                                                                                                                                                                                                       |
| Sacramento | 16-Nov-20 | <a href="https://www.cdph.ca.gov/Programs/CID/DCDC/Pages/COVID-19/guidance-for-face-coverings.aspx">https://www.cdph.ca.gov/Programs/CID/DCDC/Pages/COVID-19/guidance-for-face-coverings.aspx</a>                                                                                                                                                                                                                                                                                                                                                                                     |
| Sacramento | 19-Nov-20 | <a href="https://www.cdph.ca.gov/Programs/CID/DCDC/Pages/COVID-19/limited-stay-at-home-order.aspx">https://www.cdph.ca.gov/Programs/CID/DCDC/Pages/COVID-19/limited-stay-at-home-order.aspx</a>                                                                                                                                                                                                                                                                                                                                                                                       |
| Sacramento | 9-Dec-20  | <a href="https://www.gov.ca.gov/wp-content/uploads/2020/12/12.3.20-Stay-at-Home-Order-ICU-Scenario.pdf">https://www.gov.ca.gov/wp-content/uploads/2020/12/12.3.20-Stay-at-Home-Order-ICU-Scenario.pdf</a>                                                                                                                                                                                                                                                                                                                                                                             |
| Sacramento | 9-Dec-20  | <a href="https://www.saccounty.net/COVID-19/Documents/20201209_Sacramento_County_Health_Order_Regional_Stay_Home_Order.pdf">https://www.saccounty.net/COVID-19/Documents/20201209_Sacramento_County_Health_Order_Regional_Stay_Home_Order.pdf</a>                                                                                                                                                                                                                                                                                                                                     |
| San Benito | 29-Jan-20 | <a href="https://hhsa.cosb.us/wp-content/uploads/2020/01/SBC-PH-Monitors-2019-Novel-Coronavirus-PR-20200129-vFinal.pdf">https://hhsa.cosb.us/wp-content/uploads/2020/01/SBC-PH-Monitors-2019-Novel-Coronavirus-PR-20200129-vFinal.pdf</a>                                                                                                                                                                                                                                                                                                                                             |
| San Benito | 2-Feb-20  | <a href="https://hhsa.cosb.us/wp-content/uploads/2020/02/Two-cases-of-2019-Novel-Coronavirus-2019-nCoV02022020HAVFinal.pdf">https://hhsa.cosb.us/wp-content/uploads/2020/02/Two-cases-of-2019-Novel-Coronavirus-2019-nCoV02022020HAVFinal.pdf</a>                                                                                                                                                                                                                                                                                                                                     |
| San Benito | 4-Mar-20  | <a href="https://hhsa.cosb.us/wp-content/uploads/2020/03/2019-Novel-Coronavirus-Update-on-Community-Preparation-from-the-Health-Officer.pdf">https://hhsa.cosb.us/wp-content/uploads/2020/03/2019-Novel-Coronavirus-Update-on-Community-Preparation-from-the-Health-Officer.pdf</a>                                                                                                                                                                                                                                                                                                   |
| San Benito | 6-Mar-20  | <a href="https://hhsa.cosb.us/wp-content/uploads/2020/03/CoVid19-Press-release-en-3-6-2020.pdf">https://hhsa.cosb.us/wp-content/uploads/2020/03/CoVid19-Press-release-en-3-6-2020.pdf</a>                                                                                                                                                                                                                                                                                                                                                                                             |
| San Benito | 17-Mar-20 | <a href="https://hhsa.cosb.us/wp-content/uploads/2020/03/Order-of-the-Health-Officer-031720.pdf">https://hhsa.cosb.us/wp-content/uploads/2020/03/Order-of-the-Health-Officer-031720.pdf</a>                                                                                                                                                                                                                                                                                                                                                                                           |
| San Benito | 19-Mar-20 | <a href="https://www.gov.ca.gov/wp-content/uploads/2020/03/3.19.20-attested-EO-N-33-20-COVID-19-HEALTH-ORDER.pdf">https://www.gov.ca.gov/wp-content/uploads/2020/03/3.19.20-attested-EO-N-33-20-COVID-19-HEALTH-ORDER.pdf</a>                                                                                                                                                                                                                                                                                                                                                         |
| San Benito | 31-Mar-20 | <a href="https://hhsa.cosb.us/wp-content/uploads/2020/04/Shelter-in-Place-Order-from-the-Health-Officer033120-sm.pdf">https://hhsa.cosb.us/wp-content/uploads/2020/04/Shelter-in-Place-Order-from-the-Health-Officer033120-sm.pdf</a>                                                                                                                                                                                                                                                                                                                                                 |
| San Benito | 24-Apr-20 | <a href="https://hhsa.cosb.us/wp-content/uploads/2020/04/FaceCovering-PR-FAQ-Eng-Esp-v1.pdf">https://hhsa.cosb.us/wp-content/uploads/2020/04/FaceCovering-PR-FAQ-Eng-Esp-v1.pdf</a>                                                                                                                                                                                                                                                                                                                                                                                                   |



|                 |           |                                                                                                                                                                                                                                                                                                                                                                                                                                                                                                                                                                                       |
|-----------------|-----------|---------------------------------------------------------------------------------------------------------------------------------------------------------------------------------------------------------------------------------------------------------------------------------------------------------------------------------------------------------------------------------------------------------------------------------------------------------------------------------------------------------------------------------------------------------------------------------------|
| San Benito      | 24-Apr-20 | <a href="https://hhsa.cosb.us/wp-content/uploads/2020/04/Amended-Order-1.pdf">https://hhsa.cosb.us/wp-content/uploads/2020/04/Amended-Order-1.pdf</a>                                                                                                                                                                                                                                                                                                                                                                                                                                 |
| San Benito      | 8-May-20  | <a href="https://hhsa.cosb.us/wp-content/uploads/2020/06/SBC-combined-Eng-Esp.pdf">https://hhsa.cosb.us/wp-content/uploads/2020/06/SBC-combined-Eng-Esp.pdf</a>                                                                                                                                                                                                                                                                                                                                                                                                                       |
| San Benito      | 13-May-20 | <a href="https://hhsa.cosb.us/wp-content/uploads/2020/06/pio-37-2020-Eng-Esp.pdf">https://hhsa.cosb.us/wp-content/uploads/2020/06/pio-37-2020-Eng-Esp.pdf</a>                                                                                                                                                                                                                                                                                                                                                                                                                         |
| San Benito      | 26-May-20 | <a href="https://hhsa.cosb.us/wp-content/uploads/2020/06/SBC-Hair-Salons-Barber-Shops-pio-40-2020-Eng-Esp.pdf">https://hhsa.cosb.us/wp-content/uploads/2020/06/SBC-Hair-Salons-Barber-Shops-pio-40-2020-Eng-Esp.pdf</a>                                                                                                                                                                                                                                                                                                                                                               |
| San Benito      | 9-Jun-20  | <a href="https://hhsa.cosb.us/wp-content/uploads/2020/06/pio-45-2020-Eng-Esp.pdf">https://hhsa.cosb.us/wp-content/uploads/2020/06/pio-45-2020-Eng-Esp.pdf</a>                                                                                                                                                                                                                                                                                                                                                                                                                         |
| San Benito      | 12-Jun-20 | <a href="https://hhsa.cosb.us/wp-content/uploads/2020/06/pio-47-2020.pdf">https://hhsa.cosb.us/wp-content/uploads/2020/06/pio-47-2020.pdf</a>                                                                                                                                                                                                                                                                                                                                                                                                                                         |
| San Benito      | 18-Jun-20 | <a href="https://hhsa.cosb.us/wp-content/uploads/2020/06/Order-Rescinding-Previous-Face-Cover-order-06-18-2020.pdf">https://hhsa.cosb.us/wp-content/uploads/2020/06/Order-Rescinding-Previous-Face-Cover-order-06-18-2020.pdf</a>                                                                                                                                                                                                                                                                                                                                                     |
| San Benito      | 18-Jun-20 | <a href="https://www.cdph.ca.gov/Programs/CID/DCDC/CDPH%20Document%20Library/COVID-19/Guidance-for-Face-Coverings_06-18-2020.pdf">https://www.cdph.ca.gov/Programs/CID/DCDC/CDPH%20Document%20Library/COVID-19/Guidance-for-Face-Coverings_06-18-2020.pdf</a>                                                                                                                                                                                                                                                                                                                         |
| San Benito      | 9-Jul-20  | <a href="https://hhsa.cosb.us/publichealth/communicable-disease/covid19-press-release/covid19-pr-2020-07-09-closure-of-certain-activities/">https://hhsa.cosb.us/publichealth/communicable-disease/covid19-press-release/covid19-pr-2020-07-09-closure-of-certain-activities/</a>                                                                                                                                                                                                                                                                                                     |
| San Benito      | 13-Jul-20 | <a href="https://www.latimes.com/california/story/2020-07-13/newsom-california-county-rollback-reopening-coronavirus">https://www.latimes.com/california/story/2020-07-13/newsom-california-county-rollback-reopening-coronavirus</a>                                                                                                                                                                                                                                                                                                                                                 |
| San Benito      | 13-Jul-20 | <a href="https://hhsa.cosb.us/publichealth/communicable-disease/covid19-press-release/covid19-pr-20200713-governor-newsom-orders-closures-effective-immediately/">https://hhsa.cosb.us/publichealth/communicable-disease/covid19-press-release/covid19-pr-20200713-governor-newsom-orders-closures-effective-immediately/</a>                                                                                                                                                                                                                                                         |
| San Benito      | 17-Jul-20 | <a href="https://www.cdph.ca.gov/Programs/CID/DCDC/CDPH%20Document%20Library/COVID-19/Schools%20Reopening%20Recommendations.pdf">https://www.cdph.ca.gov/Programs/CID/DCDC/CDPH%20Document%20Library/COVID-19/Schools%20Reopening%20Recommendations.pdf</a>                                                                                                                                                                                                                                                                                                                           |
| San Benito      | 7-Aug-20  | <a href="https://hhsa.cosb.us/wp-content/uploads/2020/08/Youth-Sports-Only-Press-Release-8.7.20-Draft.pdf">https://hhsa.cosb.us/wp-content/uploads/2020/08/Youth-Sports-Only-Press-Release-8.7.20-Draft.pdf</a>                                                                                                                                                                                                                                                                                                                                                                       |
| San Benito      | 28-Aug-20 | <a href="https://abc7news.com/ca-reopneing-phases-covid19cagov-gavin-newsom-update-california-salon-reopening/6393805/">https://abc7news.com/ca-reopneing-phases-covid19cagov-gavin-newsom-update-california-salon-reopening/6393805/</a>                                                                                                                                                                                                                                                                                                                                             |
| San Benito      | 22-Sep-20 | <a href="https://files.covid19.ca.gov/pdf/guidance-expanded-personal-care-services--en.pdf">https://files.covid19.ca.gov/pdf/guidance-expanded-personal-care-services--en.pdf</a>                                                                                                                                                                                                                                                                                                                                                                                                     |
| San Benito      | 9-Oct-20  | <a href="https://wp.sbcounty.gov/cao/countywire/?p=9160#:~:text=Private%20outdoor%20gatherings%20of%20three%20households%20now%20allowed%20throughout%20the%20county%2C%20state,-Published%20October%209&amp;text=Private%20outdoor%20gatherings%20of%20people,Gavin%20Newsom%20on%20Friday.">https://wp.sbcounty.gov/cao/countywire/?p=9160#:~:text=Private%20outdoor%20gatherings%20of%20three%20households%20now%20allowed%20throughout%20the%20county%2C%20state,-Published%20October%209&amp;text=Private%20outdoor%20gatherings%20of%20people,Gavin%20Newsom%20on%20Friday.</a> |
| San Benito      | 13-Oct-20 | <a href="https://hhsa.cosb.us/wp-content/uploads/2020/10/Tier-2-Advancement-Press-Release-Final-eng-esp-vFinal.pdf">https://hhsa.cosb.us/wp-content/uploads/2020/10/Tier-2-Advancement-Press-Release-Final-eng-esp-vFinal.pdf</a>                                                                                                                                                                                                                                                                                                                                                     |
| San Benito      | 13-Nov-20 | <a href="https://www.cdph.ca.gov/Programs/CID/DCDC/Pages/COVID-19/Guidance-for-the-Prevention-of-COVID-19-Transmission-for-Gatherings-November-2020.aspx">https://www.cdph.ca.gov/Programs/CID/DCDC/Pages/COVID-19/Guidance-for-the-Prevention-of-COVID-19-Transmission-for-Gatherings-November-2020.aspx</a>                                                                                                                                                                                                                                                                         |
| San Benito      | 16-Nov-20 | <a href="https://www.cdph.ca.gov/Programs/CID/DCDC/Pages/COVID-19/guidance-for-face-coverings.aspx">https://www.cdph.ca.gov/Programs/CID/DCDC/Pages/COVID-19/guidance-for-face-coverings.aspx</a>                                                                                                                                                                                                                                                                                                                                                                                     |
| San Benito      | 17-Nov-20 | <a href="https://kmp.com/news/local/40-california-counties-in-purple-tier-including-the-central-valley">https://kmp.com/news/local/40-california-counties-in-purple-tier-including-the-central-valley</a>                                                                                                                                                                                                                                                                                                                                                                             |
| San Benito      | 19-Nov-20 | <a href="https://www.cdph.ca.gov/Programs/CID/DCDC/Pages/COVID-19/limited-stay-at-home-order.aspx">https://www.cdph.ca.gov/Programs/CID/DCDC/Pages/COVID-19/limited-stay-at-home-order.aspx</a>                                                                                                                                                                                                                                                                                                                                                                                       |
| San Benito      | 5-Dec-20  | <a href="https://www.gov.ca.gov/wp-content/uploads/2020/12/12.3.20-Stay-at-Home-Order-ICU-Scenario.pdf">https://www.gov.ca.gov/wp-content/uploads/2020/12/12.3.20-Stay-at-Home-Order-ICU-Scenario.pdf</a>                                                                                                                                                                                                                                                                                                                                                                             |
| San Bernardi no | 10-Mar-20 | <a href="https://wp.sbcounty.gov/cao/countywire/?p=5448">https://wp.sbcounty.gov/cao/countywire/?p=5448</a>                                                                                                                                                                                                                                                                                                                                                                                                                                                                           |
| San Bernardi no | 10-Mar-20 | <a href="https://wp.sbcounty.gov/dph/wp-content/uploads/sites/7/2020/03/Health-Officer-Order-Mandated-COVID-19-Reporting.pdf">https://wp.sbcounty.gov/dph/wp-content/uploads/sites/7/2020/03/Health-Officer-Order-Mandated-COVID-19-Reporting.pdf</a>                                                                                                                                                                                                                                                                                                                                 |
| San Bernardi no | 12-Mar-20 | <a href="https://wp.sbcounty.gov/dph/wp-content/uploads/sites/7/2020/03/NR-Health-Officer-orders-cancellation-of-large-gatherings-no-local-cases-in-County.pdf">https://wp.sbcounty.gov/dph/wp-content/uploads/sites/7/2020/03/NR-Health-Officer-orders-cancellation-of-large-gatherings-no-local-cases-in-County.pdf</a>                                                                                                                                                                                                                                                             |

|                |           |                                                                                                                                                                                                                                                                                                               |
|----------------|-----------|---------------------------------------------------------------------------------------------------------------------------------------------------------------------------------------------------------------------------------------------------------------------------------------------------------------|
| San Bernardino | 17-Mar-20 | <a href="https://wp.sbcounty.gov/dph/wp-content/uploads/sites/7/2020/03/Order-canceling-ALL-gatherings-FINAL.pdf">https://wp.sbcounty.gov/dph/wp-content/uploads/sites/7/2020/03/Order-canceling-ALL-gatherings-FINAL.pdf</a>                                                                                 |
| San Bernardino | 19-Mar-20 | <a href="https://www.gov.ca.gov/wp-content/uploads/2020/03/3.19.20-attested-EO-N-33-20-COVID-19-HEALTH-ORDER.pdf">https://www.gov.ca.gov/wp-content/uploads/2020/03/3.19.20-attested-EO-N-33-20-COVID-19-HEALTH-ORDER.pdf</a>                                                                                 |
| San Bernardino | 27-Mar-20 | <a href="https://wp.sbcounty.gov/dph/wp-content/uploads/sites/7/2020/04/Clarification-on-the-Order-Related-to-Lodging-Facilities.pdf">https://wp.sbcounty.gov/dph/wp-content/uploads/sites/7/2020/04/Clarification-on-the-Order-Related-to-Lodging-Facilities.pdf</a>                                         |
| San Bernardino | 2-Apr-20  | <a href="https://wp.sbcounty.gov/cao/countywire/?p=5794">https://wp.sbcounty.gov/cao/countywire/?p=5794</a>                                                                                                                                                                                                   |
| San Bernardino | 6-Apr-20  | <a href="https://wp.sbcounty.gov/dph/wp-content/uploads/sites/7/2020/04/order-040620.pdf">https://wp.sbcounty.gov/dph/wp-content/uploads/sites/7/2020/04/order-040620.pdf</a>                                                                                                                                 |
| San Bernardino | 7-Apr-20  | <a href="https://wp.sbcounty.gov/dph/wp-content/uploads/sites/7/2020/04/SKM_C45820040714190.pdf">https://wp.sbcounty.gov/dph/wp-content/uploads/sites/7/2020/04/SKM_C45820040714190.pdf</a>                                                                                                                   |
| San Bernardino | 17-Apr-20 | <a href="http://www.sbcounty.gov/Uploads/CAO/Feature/Content/Omnibus_Health_Officer_Order_4-17-20.pdf">http://www.sbcounty.gov/Uploads/CAO/Feature/Content/Omnibus_Health_Officer_Order_4-17-20.pdf</a>                                                                                                       |
| San Bernardino | 23-Apr-20 | <a href="https://sbccovid19.com/wp-content/uploads/sites/41/2020/04/Omnibus-Health-Officer-Order-Outdoor-Recreation-4.23.20-Final.pdf">https://sbccovid19.com/wp-content/uploads/sites/41/2020/04/Omnibus-Health-Officer-Order-Outdoor-Recreation-4.23.20-Final.pdf</a>                                       |
| San Bernardino | 8-May-20  | <a href="http://www.sbcounty.gov/Uploads/CAO/Feature/Content/SKM_C65820050815110.pdf">http://www.sbcounty.gov/Uploads/CAO/Feature/Content/SKM_C65820050815110.pdf</a>                                                                                                                                         |
| San Bernardino | 8-May-20  | <a href="https://sbccovid19.com/wp-content/uploads/sites/41/2020/05/LTCF-Order-5-8-20.pdf">https://sbccovid19.com/wp-content/uploads/sites/41/2020/05/LTCF-Order-5-8-20.pdf</a>                                                                                                                               |
| San Bernardino | 15-May-20 | <a href="https://wp.sbcounty.gov/cao/countywire/?p=6822">https://wp.sbcounty.gov/cao/countywire/?p=6822</a>                                                                                                                                                                                                   |
| San Bernardino | 20-May-20 | <a href="https://sbccovid19.com/wp-content/uploads/sites/41/2020/05/Optum-Serve-Order-signed-05.20.20.pdf">https://sbccovid19.com/wp-content/uploads/sites/41/2020/05/Optum-Serve-Order-signed-05.20.20.pdf</a>                                                                                               |
| San Bernardino | 22-May-20 | <a href="https://wp.sbcounty.gov/cao/countywire/?p=7067">https://wp.sbcounty.gov/cao/countywire/?p=7067</a>                                                                                                                                                                                                   |
| San Bernardino | 29-May-20 | <a href="https://sbccovid19.com/wp-content/uploads/sites/41/2020/06/Health-Officer-Order-Authorizing-Business-to-Deny-Service-without-Face-Coverings.pdf">https://sbccovid19.com/wp-content/uploads/sites/41/2020/06/Health-Officer-Order-Authorizing-Business-to-Deny-Service-without-Face-Coverings.pdf</a> |
| San Bernardino | 18-Jun-20 | <a href="https://www.cdph.ca.gov/Programs/CID/DCDC/CDPH%20Document%20Library/COVID-19/Guidance-for-Face-Coverings_06-18-2020.pdf">https://www.cdph.ca.gov/Programs/CID/DCDC/CDPH%20Document%20Library/COVID-19/Guidance-for-Face-Coverings_06-18-2020.pdf</a>                                                 |
| San Bernardino | 1-Jul-20  | <a href="https://sbccovid19.com/wp-content/uploads/sites/41/2020/07/Health-Order-re-Face-Coverings.pdf">https://sbccovid19.com/wp-content/uploads/sites/41/2020/07/Health-Order-re-Face-Coverings.pdf</a>                                                                                                     |
| San Bernardino | 1-Jul-20  | <a href="https://sbccovid19.com/wp-content/uploads/sites/41/2020/07/Order-Closing-Indoor-Services-and-Sectors-San-Bernardino.pdf">https://sbccovid19.com/wp-content/uploads/sites/41/2020/07/Order-Closing-Indoor-Services-and-Sectors-San-Bernardino.pdf</a>                                                 |

|                 |           |                                                                                                                                                                                                                                                                                                                                                                                                                                                                                                                                                                                       |
|-----------------|-----------|---------------------------------------------------------------------------------------------------------------------------------------------------------------------------------------------------------------------------------------------------------------------------------------------------------------------------------------------------------------------------------------------------------------------------------------------------------------------------------------------------------------------------------------------------------------------------------------|
| San Bernardi no | 13-Jul-20 | <a href="https://www.latimes.com/california/story/2020-07-13/newsom-california-county-rollback-reopening-coronavirus">https://www.latimes.com/california/story/2020-07-13/newsom-california-county-rollback-reopening-coronavirus</a>                                                                                                                                                                                                                                                                                                                                                 |
| San Bernardi no | 13-Jul-20 | <a href="https://wp.sbcounty.gov/cao/countywire/?p=8046">https://wp.sbcounty.gov/cao/countywire/?p=8046</a>                                                                                                                                                                                                                                                                                                                                                                                                                                                                           |
| San Bernardi no | 17-Jul-20 | <a href="https://www.cdph.ca.gov/Programs/CID/DCDC/CDPH%20Document%20Library/COVID-19/Schools%20Reopening%20Recommendations.pdf">https://www.cdph.ca.gov/Programs/CID/DCDC/CDPH%20Document%20Library/COVID-19/Schools%20Reopening%20Recommendations.pdf</a>                                                                                                                                                                                                                                                                                                                           |
| San Bernardi no | 28-Aug-20 | <a href="https://abc7news.com/ca-reopneing-phases-covid19cagov-gavin-newsom-update-california-salon-reopening/6393805/">https://abc7news.com/ca-reopneing-phases-covid19cagov-gavin-newsom-update-california-salon-reopening/6393805/</a>                                                                                                                                                                                                                                                                                                                                             |
| San Bernardi no | 22-Sep-20 | <a href="https://files.covid19.ca.gov/pdf/guidance-expanded-personal-care-services--en.pdf">https://files.covid19.ca.gov/pdf/guidance-expanded-personal-care-services--en.pdf</a>                                                                                                                                                                                                                                                                                                                                                                                                     |
| San Bernardi no | 9-Oct-20  | <a href="https://wp.sbcounty.gov/cao/countywire/?p=9160#:~:text=Private%20outdoor%20gatherings%20of%20three%20households%20now%20allowed%20throughout%20the%20county%2C%20state,-Published%20October%209&amp;text=Private%20outdoor%20gatherings%20of%20people,Gavin%20Newsom%20on%20Friday.">https://wp.sbcounty.gov/cao/countywire/?p=9160#:~:text=Private%20outdoor%20gatherings%20of%20three%20households%20now%20allowed%20throughout%20the%20county%2C%20state,-Published%20October%209&amp;text=Private%20outdoor%20gatherings%20of%20people,Gavin%20Newsom%20on%20Friday.</a> |
| San Bernardi no | 16-Nov-20 | <a href="https://www.cdph.ca.gov/Programs/CID/DCDC/Pages/COVID-19/guidance-for-face-coverings.aspx">https://www.cdph.ca.gov/Programs/CID/DCDC/Pages/COVID-19/guidance-for-face-coverings.aspx</a>                                                                                                                                                                                                                                                                                                                                                                                     |
| San Bernardi no | 19-Nov-20 | <a href="https://www.cdph.ca.gov/Programs/CID/DCDC/Pages/COVID-19/limited-stay-at-home-order.aspx">https://www.cdph.ca.gov/Programs/CID/DCDC/Pages/COVID-19/limited-stay-at-home-order.aspx</a>                                                                                                                                                                                                                                                                                                                                                                                       |
| San Bernardi no | 5-Dec-20  | <a href="https://www.gov.ca.gov/wp-content/uploads/2020/12/12.3.20-Stay-at-Home-Order-ICU-Scenario.pdf">https://www.gov.ca.gov/wp-content/uploads/2020/12/12.3.20-Stay-at-Home-Order-ICU-Scenario.pdf</a>                                                                                                                                                                                                                                                                                                                                                                             |
| San Diego       | 14-Feb-20 | <a href="https://www.kusi.com/county-declares-local-state-of-emergency-in-response-to-the-coronavirus-in-san-diego/">https://www.kusi.com/county-declares-local-state-of-emergency-in-response-to-the-coronavirus-in-san-diego/</a>                                                                                                                                                                                                                                                                                                                                                   |
| San Diego       | 20-Feb-20 | <a href="https://www.kpbs.org/news/2020/feb/20/san-diego-county-extends-coronavirus-emergency/">https://www.kpbs.org/news/2020/feb/20/san-diego-county-extends-coronavirus-emergency/</a>                                                                                                                                                                                                                                                                                                                                                                                             |
| San Diego       | 12-Mar-20 | <a href="https://www.sandiegocounty.gov/content/dam/sdc/hhsa/programs/phs/Epidemiology/OrderoftheHealthOfficer_COVID.pdf">https://www.sandiegocounty.gov/content/dam/sdc/hhsa/programs/phs/Epidemiology/OrderoftheHealthOfficer_COVID.pdf</a>                                                                                                                                                                                                                                                                                                                                         |
| San Diego       | 16-Mar-20 | <a href="https://www.countynewscenter.com/county-widens-ban-on-gatherings-covid-19-cases-reach-55/">https://www.countynewscenter.com/county-widens-ban-on-gatherings-covid-19-cases-reach-55/</a>                                                                                                                                                                                                                                                                                                                                                                                     |
| San Diego       | 18-Mar-20 | <a href="https://www.cityofelcajon.us/home/showdocument?id=21710">https://www.cityofelcajon.us/home/showdocument?id=21710</a>                                                                                                                                                                                                                                                                                                                                                                                                                                                         |
| San Diego       | 19-Mar-20 | <a href="https://www.gov.ca.gov/wp-content/uploads/2020/03/3.19.20-attested-EO-N-33-20-COVID-19-HEALTH-ORDER.pdf">https://www.gov.ca.gov/wp-content/uploads/2020/03/3.19.20-attested-EO-N-33-20-COVID-19-HEALTH-ORDER.pdf</a>                                                                                                                                                                                                                                                                                                                                                         |
| San Diego       | 27-Mar-20 | <a href="https://www.cityofelcajon.us/home/showdocument?id=21753">https://www.cityofelcajon.us/home/showdocument?id=21753</a>                                                                                                                                                                                                                                                                                                                                                                                                                                                         |
| San Diego       | 30-Mar-20 | <a href="https://web.archive.org/web/20200331034011/https://www.sandiegocounty.gov/content/dam/sdc/hhsa/programs/phs/Epidemiology/HealthOrderCruiseShipDisembarkation.pdf">https://web.archive.org/web/20200331034011/https://www.sandiegocounty.gov/content/dam/sdc/hhsa/programs/phs/Epidemiology/HealthOrderCruiseShipDisembarkation.pdf</a>                                                                                                                                                                                                                                       |
| San Diego       | 30-Mar-20 | <a href="https://web.archive.org/web/20200331030809/https://www.sandiegocounty.gov/content/dam/sdc/hhsa/programs/phs/Epidemiology/HealthOrderCruiseShipDocking.pdf">https://web.archive.org/web/20200331030809/https://www.sandiegocounty.gov/content/dam/sdc/hhsa/programs/phs/Epidemiology/HealthOrderCruiseShipDocking.pdf</a>                                                                                                                                                                                                                                                     |
| San Diego       | 3-Apr-20  | <a href="https://www.cityofelcajon.us/home/showdocument?id=21767">https://www.cityofelcajon.us/home/showdocument?id=21767</a>                                                                                                                                                                                                                                                                                                                                                                                                                                                         |
| San Diego       | 7-Apr-20  | <a href="https://web.archive.org/web/20200425124026/https://www.sandiegocounty.gov/content/dam/sdc/hhsa/programs/phs/Epidemiology/covid19/HealthOfficerOrder-Quarantine.pdf">https://web.archive.org/web/20200425124026/https://www.sandiegocounty.gov/content/dam/sdc/hhsa/programs/phs/Epidemiology/covid19/HealthOfficerOrder-Quarantine.pdf</a>                                                                                                                                                                                                                                   |
| San Diego       | 17-Apr-20 | <a href="https://web.archive.org/web/20200425124005/https://www.sandiegocounty.gov/content/dam/sdc/hhsa/programs/phs/Epidemiology/covid19/HealthOfficerOrder-Isolation.pdf">https://web.archive.org/web/20200425124005/https://www.sandiegocounty.gov/content/dam/sdc/hhsa/programs/phs/Epidemiology/covid19/HealthOfficerOrder-Isolation.pdf</a>                                                                                                                                                                                                                                     |
| San Diego       | 26-Apr-20 | <a href="https://www.nbcsandiego.com/news/local/county-clears-way-for-beaches-to-reopen-at-cities-discretion/2312616/">https://www.nbcsandiego.com/news/local/county-clears-way-for-beaches-to-reopen-at-cities-discretion/2312616/</a>                                                                                                                                                                                                                                                                                                                                               |

|           |           |                                                                                                                                                                                                                                                                                                                                                                         |
|-----------|-----------|-------------------------------------------------------------------------------------------------------------------------------------------------------------------------------------------------------------------------------------------------------------------------------------------------------------------------------------------------------------------------|
| San Diego | 30-Apr-20 | <a href="https://www.nbcsandiego.com/news/local/face-coverings-required-for-all-san-diegans-on-may-1-heres-what-to-know/2316204/">https://www.nbcsandiego.com/news/local/face-coverings-required-for-all-san-diegans-on-may-1-heres-what-to-know/2316204/</a>                                                                                                           |
| San Diego | 7-May-20  | <a href="https://www.cityofelcajon.us/home/showdocument?id=22863">https://www.cityofelcajon.us/home/showdocument?id=22863</a>                                                                                                                                                                                                                                           |
| San Diego | 20-May-20 | <a href="https://www.sandiegouniontribune.com/news/story/2020-05-20/coronavirus-summary-may-20">https://www.sandiegouniontribune.com/news/story/2020-05-20/coronavirus-summary-may-20</a>                                                                                                                                                                               |
| San Diego | 26-May-20 | <a href="https://www.sandiegouniontribune.com/news/story/2020-05-26/coronavirus-summary-may-26-barber-shops-hair-salons-get-ok-to-reopen-theme-parks-targeted-july-1">https://www.sandiegouniontribune.com/news/story/2020-05-26/coronavirus-summary-may-26-barber-shops-hair-salons-get-ok-to-reopen-theme-parks-targeted-july-1</a>                                   |
| San Diego | 29-May-20 | <a href="https://web.archive.org/web/20200531093636/https://www.sandiegocounty.gov/content/dam/sdc/hhsa/programs/phs/Epidemiology/HealthOfficerOrderCOVID19.pdf">https://web.archive.org/web/20200531093636/https://www.sandiegocounty.gov/content/dam/sdc/hhsa/programs/phs/Epidemiology/HealthOfficerOrderCOVID19.pdf</a>                                             |
| San Diego | 8-Jun-20  | <a href="https://www.nbcsandiego.com/news/local/gyms-bars-museums-hotels-more-can-reopen-friday-sd-county-says/2342823/">https://www.nbcsandiego.com/news/local/gyms-bars-museums-hotels-more-can-reopen-friday-sd-county-says/2342823/</a>                                                                                                                             |
| San Diego | 18-Jun-20 | <a href="https://www.cdph.ca.gov/Programs/CID/DCDC/CDPH%20Document%20Library/COVID-19/Guidance-for-Face-Coverings_06-18-2020.pdf">https://www.cdph.ca.gov/Programs/CID/DCDC/CDPH%20Document%20Library/COVID-19/Guidance-for-Face-Coverings_06-18-2020.pdf</a>                                                                                                           |
| San Diego | 18-Jun-20 | <a href="https://web.archive.org/web/20200626170415/https://www.sandiegocounty.gov/content/dam/sdc/hhsa/programs/phs/Epidemiology/HealthOfficerOrderCOVID19.pdf">https://web.archive.org/web/20200626170415/https://www.sandiegocounty.gov/content/dam/sdc/hhsa/programs/phs/Epidemiology/HealthOfficerOrderCOVID19.pdf</a>                                             |
| San Diego | 29-Jun-20 | <a href="https://www.cbs8.com/article/news/health/coronavirus/san-diego-county-restaurants-to-close-by-10-pm-starting-july-1/509-495333c-2796-4e30-b891-3e4d51691032">https://www.cbs8.com/article/news/health/coronavirus/san-diego-county-restaurants-to-close-by-10-pm-starting-july-1/509-495333c-2796-4e30-b891-3e4d51691032</a>                                   |
| San Diego | 6-Jul-20  | <a href="https://web.archive.org/web/20200712180136/https://www.sandiegocounty.gov/content/dam/sdc/hhsa/programs/phs/Epidemiology/HealthOfficerOrderCOVID19.pdf">https://web.archive.org/web/20200712180136/https://www.sandiegocounty.gov/content/dam/sdc/hhsa/programs/phs/Epidemiology/HealthOfficerOrderCOVID19.pdf</a>                                             |
| San Diego | 13-Jul-20 | <a href="https://www.latimes.com/california/story/2020-07-13/newsom-california-county-rollback-reopening-coronavirus">https://www.latimes.com/california/story/2020-07-13/newsom-california-county-rollback-reopening-coronavirus</a>                                                                                                                                   |
| San Diego | 13-Jul-20 | <a href="https://www.kpbs.org/news/2020/jul/13/more-indoor-businesses-orderd-close-san-diego-new/">https://www.kpbs.org/news/2020/jul/13/more-indoor-businesses-orderd-close-san-diego-new/</a>                                                                                                                                                                         |
| San Diego | 14-Jul-20 | <a href="https://www.sdsheriff.net/newsroom/links/le-response-coronavirus.pdf">https://www.sdsheriff.net/newsroom/links/le-response-coronavirus.pdf</a>                                                                                                                                                                                                                 |
| San Diego | 17-Jul-20 | <a href="https://www.cdph.ca.gov/Programs/CID/DCDC/CDPH%20Document%20Library/COVID-19/Schools%20Reopening%20Recommendations.pdf">https://www.cdph.ca.gov/Programs/CID/DCDC/CDPH%20Document%20Library/COVID-19/Schools%20Reopening%20Recommendations.pdf</a>                                                                                                             |
| San Diego | 24-Jul-20 | <a href="https://www.sandiegocounty.gov/content/dam/sdc/hhsa/programs/phs/Epidemiology/covid19/HealthOfficerOrder-Quarantine.pdf?pkid=10">https://www.sandiegocounty.gov/content/dam/sdc/hhsa/programs/phs/Epidemiology/covid19/HealthOfficerOrder-Quarantine.pdf?pkid=10</a>                                                                                           |
| San Diego | 29-Jul-20 | <a href="https://www.sandiegocounty.gov/content/dam/sdc/hhsa/programs/phs/Epidemiology/HealthOfficerOrderCOVID19.pdf">https://www.sandiegocounty.gov/content/dam/sdc/hhsa/programs/phs/Epidemiology/HealthOfficerOrderCOVID19.pdf</a>                                                                                                                                   |
| San Diego | 22-Aug-20 | <a href="https://www.sandiegocounty.gov/content/dam/sdc/hhsa/programs/phs/Epidemiology/HealthOfficerOrderCOVID19.pdf">https://www.sandiegocounty.gov/content/dam/sdc/hhsa/programs/phs/Epidemiology/HealthOfficerOrderCOVID19.pdf</a>                                                                                                                                   |
| San Diego | 28-Aug-20 | <a href="https://projects.sfchronicle.com/2020/coronavirus-map/california-reopening/">https://projects.sfchronicle.com/2020/coronavirus-map/california-reopening/</a>                                                                                                                                                                                                   |
| San Diego | 31-Aug-20 | <a href="https://www.sandiegocounty.gov/content/dam/sdc/hhsa/programs/phs/Epidemiology/covid19/covid19PHOrders/PUBLIC_HEALTH_ORDER_EFFECTIVE_DATE_09.01.20_EXECUTED_DATE_08.31.20.pdf">https://www.sandiegocounty.gov/content/dam/sdc/hhsa/programs/phs/Epidemiology/covid19/covid19PHOrders/PUBLIC_HEALTH_ORDER_EFFECTIVE_DATE_09.01.20_EXECUTED_DATE_08.31.20.pdf</a> |
| San Diego | 10-Sep-20 | <a href="https://www.sandiegocounty.gov/content/dam/sdc/hhsa/programs/phs/Epidemiology/HealthOfficerOrderCOVID19.pdf">https://www.sandiegocounty.gov/content/dam/sdc/hhsa/programs/phs/Epidemiology/HealthOfficerOrderCOVID19.pdf</a>                                                                                                                                   |
| San Diego | 9-Oct-20  | <a href="https://www.sandiegocounty.gov/content/dam/sdc/hhsa/programs/phs/Epidemiology/HealthOfficerOrderCOVID19.pdf">https://www.sandiegocounty.gov/content/dam/sdc/hhsa/programs/phs/Epidemiology/HealthOfficerOrderCOVID19.pdf</a>                                                                                                                                   |
| San Diego | 10-Nov-20 | <a href="https://www.latimes.com/california/story/2020-11-10/california-coronavirus-cases-climb-more-counties-expected-strict-reopenings">https://www.latimes.com/california/story/2020-11-10/california-coronavirus-cases-climb-more-counties-expected-strict-reopenings</a>                                                                                           |
| San Diego | 20-Nov-20 | <a href="https://www.sandiegocounty.gov/content/dam/sdc/hhsa/programs/phs/Epidemiology/HealthOfficerOrderCOVID19.pdf">https://www.sandiegocounty.gov/content/dam/sdc/hhsa/programs/phs/Epidemiology/HealthOfficerOrderCOVID19.pdf</a>                                                                                                                                   |
| San Diego | 5-Dec-20  | <a href="https://www.gov.ca.gov/wp-content/uploads/2020/12/12.3.20-Stay-at-Home-Order-ICU-Scenario.pdf">https://www.gov.ca.gov/wp-content/uploads/2020/12/12.3.20-Stay-at-Home-Order-ICU-Scenario.pdf</a>                                                                                                                                                               |
| San Diego | 5-Dec-20  | <a href="https://web.archive.org/web/20201206022841/https://www.sandiegocounty.gov/content/dam/sdc/hhsa/programs/phs/Epidemiology/HealthOfficerOrderCOVID19.pdf">https://web.archive.org/web/20201206022841/https://www.sandiegocounty.gov/content/dam/sdc/hhsa/programs/phs/Epidemiology/HealthOfficerOrderCOVID19.pdf</a>                                             |
| San Diego | 9-Dec-20  | <a href="https://www.sandiegocounty.gov/content/dam/sdc/hhsa/programs/phs/Epidemiology/HealthOfficerOrderCOVID19.pdf">https://www.sandiegocounty.gov/content/dam/sdc/hhsa/programs/phs/Epidemiology/HealthOfficerOrderCOVID19.pdf</a>                                                                                                                                   |

|               |           |                                                                                                                                                                                                                                                                                                 |
|---------------|-----------|-------------------------------------------------------------------------------------------------------------------------------------------------------------------------------------------------------------------------------------------------------------------------------------------------|
| San Francisco | 25-Feb-20 | <a href="https://www.sfdph.org/dph/alerts/files/PR-COVID-02.25.20_Public_Health_Update_Novel_Coronavirus.pdf">https://www.sfdph.org/dph/alerts/files/PR-COVID-02.25.20_Public_Health_Update_Novel_Coronavirus.pdf</a>                                                                           |
| San Francisco | 3-Mar-20  | <a href="https://www.sfdph.org/dph/alerts/files/HealthOfficerLocalEmergencyDeclaration-03062020.pdf">https://www.sfdph.org/dph/alerts/files/HealthOfficerLocalEmergencyDeclaration-03062020.pdf</a>                                                                                             |
| San Francisco | 6-Mar-20  | <a href="https://www.sfdph.org/dph/alerts/files/HealthOfficerLocalEmergencyDeclaration-03062020.pdf">https://www.sfdph.org/dph/alerts/files/HealthOfficerLocalEmergencyDeclaration-03062020.pdf</a>                                                                                             |
| San Francisco | 7-Mar-20  | <a href="https://www.sfdph.org/dph/alerts/files/OrderProhibitingGatherings-City-OwnedLocations-Order-C19-02-03072020.pdf">https://www.sfdph.org/dph/alerts/files/OrderProhibitingGatherings-City-OwnedLocations-Order-C19-02-03072020.pdf</a>                                                   |
| San Francisco | 10-Mar-20 | <a href="https://www.sfdph.org/dph/alerts/files/OrderC19-04-signed.pdf">https://www.sfdph.org/dph/alerts/files/OrderC19-04-signed.pdf</a>                                                                                                                                                       |
| San Francisco | 10-Mar-20 | <a href="https://www.sfdph.org/dph/alerts/files/OrderExcludingVisitorstoSNFs-OrderC19-03-03102020.pdf">https://www.sfdph.org/dph/alerts/files/OrderExcludingVisitorstoSNFs-OrderC19-03-03102020.pdf</a>                                                                                         |
| San Francisco | 11-Mar-20 | <a href="https://www.sfdph.org/dph/alerts/files/PR-COVID-LargeEvents_COVID-19-03112020.pdf">https://www.sfdph.org/dph/alerts/files/PR-COVID-LargeEvents_COVID-19-03112020.pdf</a>                                                                                                               |
| San Francisco | 13-Mar-20 | <a href="https://www.sfdph.org/dph/alerts/files/PR-COVID-EvictionMoratorium-COVID-19-03132020.pdf">https://www.sfdph.org/dph/alerts/files/PR-COVID-EvictionMoratorium-COVID-19-03132020.pdf</a>                                                                                                 |
| San Francisco | 13-Mar-20 | <a href="https://www.sfdph.org/dph/alerts/files/Order-Prohibiting-Large-Gatherings(Order%20C19-05b)-031320.pdf">https://www.sfdph.org/dph/alerts/files/Order-Prohibiting-Large-Gatherings(Order%20C19-05b)-031320.pdf</a>                                                                       |
| San Francisco | 16-Mar-20 | <a href="https://web.archive.org/web/20200320130233/https://www.sfdph.org/dph/alerts/files/HealthOrderC19-07-%20Shelter-in-Place.pdf">https://web.archive.org/web/20200320130233/https://www.sfdph.org/dph/alerts/files/HealthOrderC19-07-%20Shelter-in-Place.pdf</a>                           |
| San Francisco | 17-Mar-20 | <a href="https://www.sfdph.org/dph/alerts/files/Order-C19-08-ProhibitingElectiveSurgery.pdf">https://www.sfdph.org/dph/alerts/files/Order-C19-08-ProhibitingElectiveSurgery.pdf</a>                                                                                                             |
| San Francisco | 18-Mar-20 | <a href="https://www.sfdph.org/dph/alerts/files/Order-C19-09-ExcludingVisitorstoARFs-RCFEs-03192020.pdf">https://www.sfdph.org/dph/alerts/files/Order-C19-09-ExcludingVisitorstoARFs-RCFEs-03192020.pdf</a>                                                                                     |
| San Francisco | 19-Mar-20 | <a href="https://www.gov.ca.gov/wp-content/uploads/2020/03/3.19.20-attested-EO-N-33-20-COVID-19-HEALTH-ORDER.pdf">https://www.gov.ca.gov/wp-content/uploads/2020/03/3.19.20-attested-EO-N-33-20-COVID-19-HEALTH-ORDER.pdf</a>                                                                   |
| San Francisco | 24-Mar-20 | <a href="https://www.sfdph.org/dph/alerts/files/PR-COVID-MediaStatementLabReportingOrder-032420.pdf">https://www.sfdph.org/dph/alerts/files/PR-COVID-MediaStatementLabReportingOrder-032420.pdf</a>                                                                                             |
| San Francisco | 24-Mar-20 | <a href="https://www.sfdph.org/dph/alerts/files/Order-C19-11-ProtectiveQuarantineLHH-03262020.pdf">https://www.sfdph.org/dph/alerts/files/Order-C19-11-ProtectiveQuarantineLHH-03262020.pdf</a>                                                                                                 |
| San Francisco | 25-Mar-20 | <a href="https://www.sfexaminer.com/news/san-francisco-bay-area-schools-extend-closure-another-month/">https://www.sfexaminer.com/news/san-francisco-bay-area-schools-extend-closure-another-month/</a>                                                                                         |
| San Francisco | 31-Mar-20 | <a href="https://web.archive.org/web/20200405015905/https://www.sfdph.org/dph/alerts/files/HealthOfficerOrder-C19-07b-ShelterInPlace-03312020.pdf">https://web.archive.org/web/20200405015905/https://www.sfdph.org/dph/alerts/files/HealthOfficerOrder-C19-07b-ShelterInPlace-03312020.pdf</a> |
| San Francisco | 2-Apr-20  | <a href="https://www.sfdph.org/dph/alerts/files/PR-COVID-DEM-Advisory-CCSF-04022020.pdf">https://www.sfdph.org/dph/alerts/files/PR-COVID-DEM-Advisory-CCSF-04022020.pdf</a>                                                                                                                     |
| San Francisco | 17-Apr-20 | <a href="https://web.archive.org/web/20200418181627/https://www.sfdph.org/dph/alerts/files/OrderNoC19-12-RequiringFaceCovering-04172020.pdf">https://web.archive.org/web/20200418181627/https://www.sfdph.org/dph/alerts/files/OrderNoC19-12-RequiringFaceCovering-04172020.pdf</a>             |
| San Francisco | 29-Apr-20 | <a href="https://sfmayor.org/article/san-francisco-and-bay-area-extend-stay-home-order-through-end-may">https://sfmayor.org/article/san-francisco-and-bay-area-extend-stay-home-order-through-end-may</a>                                                                                       |
| San Francisco | 7-May-20  | <a href="https://www.sfdph.org/dph/alerts/files/Order-C19-13-SNF-Testing-Cooperation-and-Reporting.pdf">https://www.sfdph.org/dph/alerts/files/Order-C19-13-SNF-Testing-Cooperation-and-Reporting.pdf</a>                                                                                       |
| San Francisco | 15-May-20 | <a href="https://www.sfdph.org/dph/alerts/files/OrderC19-08b-ElectiveSurgeriesRoutineAppointments-05152020.pdf">https://www.sfdph.org/dph/alerts/files/OrderC19-08b-ElectiveSurgeriesRoutineAppointments-05152020.pdf</a>                                                                       |
| San Francisco | 17-May-20 | <a href="https://web.archive.org/web/20200528202613/https://www.sfdph.org/dph/alerts/files/HealthOfficerOrderC19-07d-ShelterInPlace-05172020.pdf">https://web.archive.org/web/20200528202613/https://www.sfdph.org/dph/alerts/files/HealthOfficerOrderC19-07d-ShelterInPlace-05172020.pdf</a>   |
| San Francisco | 22-May-20 | <a href="https://www.sfdph.org/dph/alerts/files/C19-07e-Shelter-in-Place-Health-Order-as-revised.pdf">https://www.sfdph.org/dph/alerts/files/C19-07e-Shelter-in-Place-Health-Order-as-revised.pdf</a>                                                                                           |
| San Francisco | 26-May-20 | <a href="https://www.sfdph.org/dph/alerts/files/Order-C19-06-Visitors-to-Hospitals.pdf">https://www.sfdph.org/dph/alerts/files/Order-C19-06-Visitors-to-Hospitals.pdf</a>                                                                                                                       |
| San Francisco | 28-May-20 | <a href="https://www.sfdph.org/dph/alerts/files/Order-No-C19-12b-RequiringFaceCoverings-05282020.pdf">https://www.sfdph.org/dph/alerts/files/Order-No-C19-12b-RequiringFaceCoverings-05282020.pdf</a>                                                                                           |

|               |           |                                                                                                                                                                                                                                                                                                                                                                                                                                                                                                                                                                                       |
|---------------|-----------|---------------------------------------------------------------------------------------------------------------------------------------------------------------------------------------------------------------------------------------------------------------------------------------------------------------------------------------------------------------------------------------------------------------------------------------------------------------------------------------------------------------------------------------------------------------------------------------|
| San Francisco | 1-Jun-20  | <a href="https://www.sfdph.org/dph/alerts/files/Directive-2020-10-Curbside-Pickup.pdf">https://www.sfdph.org/dph/alerts/files/Directive-2020-10-Curbside-Pickup.pdf</a>                                                                                                                                                                                                                                                                                                                                                                                                               |
| San Francisco | 11-Jun-20 | <a href="https://www.sfdph.org/dph/alerts/files/C19-07e-Shelter-in-Place-Health-Order-as-revised.pdf">https://www.sfdph.org/dph/alerts/files/C19-07e-Shelter-in-Place-Health-Order-as-revised.pdf</a>                                                                                                                                                                                                                                                                                                                                                                                 |
| San Francisco | 15-Jun-20 | <a href="https://sfmayor.org/article/san-francisco-moves-next-phase-reopening">https://sfmayor.org/article/san-francisco-moves-next-phase-reopening</a>                                                                                                                                                                                                                                                                                                                                                                                                                               |
| San Francisco | 18-Jun-20 | <a href="https://www.cdph.ca.gov/Programs/CID/DCDC/CDPH%20Document%20Library/COVID-19/Guidance-for-Face-Coverings_06-18-2020.pdf">https://www.cdph.ca.gov/Programs/CID/DCDC/CDPH%20Document%20Library/COVID-19/Guidance-for-Face-Coverings_06-18-2020.pdf</a>                                                                                                                                                                                                                                                                                                                         |
| San Francisco | 25-Jun-20 | <a href="https://www.sfdph.org/dph/alerts/files/Order-C19-14-Postmortem-Testing.pdf">https://www.sfdph.org/dph/alerts/files/Order-C19-14-Postmortem-Testing.pdf</a>                                                                                                                                                                                                                                                                                                                                                                                                                   |
| San Francisco | 2-Jul-20  | <a href="https://www.sfdph.org/dph/alerts/files/PR-SF-Asks-Residents-to-Stay-Home-for-July4.pdf">https://www.sfdph.org/dph/alerts/files/PR-SF-Asks-Residents-to-Stay-Home-for-July4.pdf</a>                                                                                                                                                                                                                                                                                                                                                                                           |
| San Francisco | 13-Jul-20 | <a href="https://www.latimes.com/california/story/2020-07-13/newsom-california-county-rollback-reopening-coronavirus">https://www.latimes.com/california/story/2020-07-13/newsom-california-county-rollback-reopening-coronavirus</a>                                                                                                                                                                                                                                                                                                                                                 |
| San Francisco | 13-Jul-20 | <a href="https://www.sfdph.org/dph/alerts/files/C19-07f-Shelter-in-Place-Health-Order.pdf">https://www.sfdph.org/dph/alerts/files/C19-07f-Shelter-in-Place-Health-Order.pdf</a>                                                                                                                                                                                                                                                                                                                                                                                                       |
| San Francisco | 15-Jul-20 | <a href="https://www.sfgate.com/bayarea/article/San-Francisco-Zoo-visit-open-covid-19-15411053.php">https://www.sfgate.com/bayarea/article/San-Francisco-Zoo-visit-open-covid-19-15411053.php</a>                                                                                                                                                                                                                                                                                                                                                                                     |
| San Francisco | 20-Jul-20 | <a href="https://www.nbcbayarea.com/news/local/san-francisco/san-francisco-businesses-forced-to-shut-down-again/2329504/">https://www.nbcbayarea.com/news/local/san-francisco/san-francisco-businesses-forced-to-shut-down-again/2329504/</a>                                                                                                                                                                                                                                                                                                                                         |
| San Francisco | 22-Jul-20 | <a href="https://www.sfdph.org/dph/alerts/files/Order-C19-12-Face-Coverings.pdf">https://www.sfdph.org/dph/alerts/files/Order-C19-12-Face-Coverings.pdf</a>                                                                                                                                                                                                                                                                                                                                                                                                                           |
| San Francisco | 13-Aug-20 | <a href="https://www.sfdph.org/dph/alerts/files/Order-C19-15-Health-Facility-and-Provider-Testing.pdf">https://www.sfdph.org/dph/alerts/files/Order-C19-15-Health-Facility-and-Provider-Testing.pdf</a>                                                                                                                                                                                                                                                                                                                                                                               |
| San Francisco | 14-Aug-20 | <a href="https://www.sfdph.org/dph/alerts/files/C19-07g-Shelter-in-Place-Health-Order.pdf">https://www.sfdph.org/dph/alerts/files/C19-07g-Shelter-in-Place-Health-Order.pdf</a>                                                                                                                                                                                                                                                                                                                                                                                                       |
| San Francisco | 28-Aug-20 | <a href="https://projects.sfchronicle.com/2020/coronavirus-map/california-reopening/">https://projects.sfchronicle.com/2020/coronavirus-map/california-reopening/</a>                                                                                                                                                                                                                                                                                                                                                                                                                 |
| San Francisco | 1-Sep-20  | <a href="https://www.bizjournals.com/sanfrancisco/news/2020/09/01/sf-opens-malls-mayor-breed-september-reopen.html">https://www.bizjournals.com/sanfrancisco/news/2020/09/01/sf-opens-malls-mayor-breed-september-reopen.html</a>                                                                                                                                                                                                                                                                                                                                                     |
| San Francisco | 9-Sep-20  | <a href="https://www.kron4.com/news/bay-area/gyms-reopen-outdoors-in-san-francisco/">https://www.kron4.com/news/bay-area/gyms-reopen-outdoors-in-san-francisco/</a>                                                                                                                                                                                                                                                                                                                                                                                                                   |
| San Francisco | 14-Sep-20 | <a href="https://www.sfdph.org/dph/alerts/files/C19-07i-Shelter-in-Place-Health-Order.pdf">https://www.sfdph.org/dph/alerts/files/C19-07i-Shelter-in-Place-Health-Order.pdf</a>                                                                                                                                                                                                                                                                                                                                                                                                       |
| San Francisco | 21-Sep-20 | <a href="https://www.sfchronicle.com/bayarea/article/SF-reopening-calendar-Dates-when-restaurants-15301361.php">https://www.sfchronicle.com/bayarea/article/SF-reopening-calendar-Dates-when-restaurants-15301361.php</a>                                                                                                                                                                                                                                                                                                                                                             |
| San Francisco | 29-Sep-20 | <a href="https://www.sfgate.com/bayarea/article/San-Francisco-red-orange-tier-update-Dr-Ghaly-15606598.php">https://www.sfgate.com/bayarea/article/San-Francisco-red-orange-tier-update-Dr-Ghaly-15606598.php</a>                                                                                                                                                                                                                                                                                                                                                                     |
| San Francisco | 7-Oct-20  | <a href="https://www.sfgate.com/bayarea/article/San-Francisco-red-orange-tier-update-Dr-Ghaly-15606598.php">https://www.sfgate.com/bayarea/article/San-Francisco-red-orange-tier-update-Dr-Ghaly-15606598.php</a>                                                                                                                                                                                                                                                                                                                                                                     |
| San Francisco | 9-Oct-20  | <a href="https://wp.sbcounty.gov/cao/countywire/?p=9160#:~:text=Private%20outdoor%20gatherings%20of%20three%20households%20now%20allowed%20throughout%20the%20county%2C%20state,-Published%20October%209&amp;text=Private%20outdoor%20gatherings%20of%20people,Gavin%20Newsom%20on%20Friday.">https://wp.sbcounty.gov/cao/countywire/?p=9160#:~:text=Private%20outdoor%20gatherings%20of%20three%20households%20now%20allowed%20throughout%20the%20county%2C%20state,-Published%20October%209&amp;text=Private%20outdoor%20gatherings%20of%20people,Gavin%20Newsom%20on%20Friday.</a> |
| San Francisco | 14-Oct-20 | <a href="https://sanfrancisco.cbslocal.com/2020/10/14/covid-reopening-san-francisco-allows-children-to-return-to-citys-playgrounds/">https://sanfrancisco.cbslocal.com/2020/10/14/covid-reopening-san-francisco-allows-children-to-return-to-citys-playgrounds/</a>                                                                                                                                                                                                                                                                                                                   |
| San Francisco | 20-Oct-20 | <a href="https://sfmayor.org/article/san-francisco-continues-reopening-expanded-business-operations-and-activities">https://sfmayor.org/article/san-francisco-continues-reopening-expanded-business-operations-and-activities</a>                                                                                                                                                                                                                                                                                                                                                     |
| San Francisco | 20-Oct-20 | <a href="https://www.sfdph.org/dph/alerts/files/Directive-2020-19-Outdoor-Gatherings.pdf">https://www.sfdph.org/dph/alerts/files/Directive-2020-19-Outdoor-Gatherings.pdf</a>                                                                                                                                                                                                                                                                                                                                                                                                         |
| San Francisco | 27-Oct-20 | <a href="https://www.sfdph.org/dph/alerts/files/C19-07-Shelter-in-Place-Health-Order.pdf">https://www.sfdph.org/dph/alerts/files/C19-07-Shelter-in-Place-Health-Order.pdf</a>                                                                                                                                                                                                                                                                                                                                                                                                         |
| San Francisco | 6-Nov-20  | <a href="https://www.sfdph.org/dph/alerts/files/Order-C19-15-Health-Facility-and-Provider-Testing.pdf">https://www.sfdph.org/dph/alerts/files/Order-C19-15-Health-Facility-and-Provider-Testing.pdf</a>                                                                                                                                                                                                                                                                                                                                                                               |

|               |           |                                                                                                                                                                                                                                                                                                                                                                                                               |
|---------------|-----------|---------------------------------------------------------------------------------------------------------------------------------------------------------------------------------------------------------------------------------------------------------------------------------------------------------------------------------------------------------------------------------------------------------------|
| San Francisco | 10-Nov-20 | <a href="https://sfmayor.org/article/san-francisco-roll-back-select-activities-response-increase-covid-19-cases">https://sfmayor.org/article/san-francisco-roll-back-select-activities-response-increase-covid-19-cases</a>                                                                                                                                                                                   |
| San Francisco | 16-Nov-20 | <a href="https://www.sfdph.org/dph/alerts/files/C19-07-Shelter-in-Place-Health-Order.pdf">https://www.sfdph.org/dph/alerts/files/C19-07-Shelter-in-Place-Health-Order.pdf</a>                                                                                                                                                                                                                                 |
| San Francisco | 28-Nov-20 | <a href="https://sf.gov/news/sf-assigned-states-purple-tier-will-roll-back-many-non-essential-activities">https://sf.gov/news/sf-assigned-states-purple-tier-will-roll-back-many-non-essential-activities</a>                                                                                                                                                                                                 |
| San Francisco | 4-Dec-20  | <a href="https://www.nbcbayarea.com/news/coronavirus/when-will-new-coronavirus-stay-at-home-order-impact-bay-area/2415063/">https://www.nbcbayarea.com/news/coronavirus/when-will-new-coronavirus-stay-at-home-order-impact-bay-area/2415063/</a>                                                                                                                                                             |
| San Francisco | 9-Dec-20  | <a href="https://www.sfdph.org/dph/alerts/files/C19-07-Shelter-in-Place-Health-Order.pdf">https://www.sfdph.org/dph/alerts/files/C19-07-Shelter-in-Place-Health-Order.pdf</a>                                                                                                                                                                                                                                 |
| San Francisco | 11-Dec-20 | <a href="https://www.sfdph.org/dph/alerts/files/Order-C19-16-Hospitals-Data.pdf">https://www.sfdph.org/dph/alerts/files/Order-C19-16-Hospitals-Data.pdf</a>                                                                                                                                                                                                                                                   |
| San Francisco | 16-Dec-20 | <a href="https://www.sfdph.org/dph/alerts/files/Order-C19-17-Surge-Related-Travel-Quarantine.pdf">https://www.sfdph.org/dph/alerts/files/Order-C19-17-Surge-Related-Travel-Quarantine.pdf</a>                                                                                                                                                                                                                 |
| San Francisco | 16-Dec-20 | <a href="https://www.gov.ca.gov/wp-content/uploads/2020/12/12.3.20-Stay-at-Home-Order-ICU-Scenario.pdf">https://www.gov.ca.gov/wp-content/uploads/2020/12/12.3.20-Stay-at-Home-Order-ICU-Scenario.pdf</a>                                                                                                                                                                                                     |
| San Francisco | 22-Dec-20 | <a href="https://www.sfdph.org/dph/alerts/files/Order-C19-12-Face-Coverings.pdf">https://www.sfdph.org/dph/alerts/files/Order-C19-12-Face-Coverings.pdf</a>                                                                                                                                                                                                                                                   |
| San Joaquin   | 12-Mar-20 | <a href="https://www.sjgov.org/covid19/declaration_of_local_health_emergency_covid-19__032020.pdf">https://www.sjgov.org/covid19/declaration_of_local_health_emergency_covid-19__032020.pdf</a>                                                                                                                                                                                                               |
| San Joaquin   | 13-Mar-20 | <a href="https://www.sjgov.org/WorkArea/DownloadAsset.aspx?id=32430">https://www.sjgov.org/WorkArea/DownloadAsset.aspx?id=32430</a>                                                                                                                                                                                                                                                                           |
| San Joaquin   | 13-Mar-20 | <a href="http://www.sjcphs.org/assets/20200313_SJCPHS%20Guidance%20for%20Schools%20Childcare_Providers%20COVID-19.pdf">http://www.sjcphs.org/assets/20200313_SJCPHS%20Guidance%20for%20Schools%20Childcare_Providers%20COVID-19.pdf</a>                                                                                                                                                                       |
| San Joaquin   | 15-Mar-20 | <a href="https://web.archive.org/web/20200401021059/http://www.sjcphs.org/assets/20200315_HN_Order%20of%20The%20Health%20Officer%20COVID-19.pdf">https://web.archive.org/web/20200401021059/http://www.sjcphs.org/assets/20200315_HN_Order%20of%20The%20Health%20Officer%20COVID-19.pdf</a>                                                                                                                   |
| San Joaquin   | 17-Mar-20 | <a href="https://www.sjgov.org/WorkArea/DownloadAsset.aspx?id=32442">https://www.sjgov.org/WorkArea/DownloadAsset.aspx?id=32442</a>                                                                                                                                                                                                                                                                           |
| San Joaquin   | 18-Mar-20 | <a href="http://www.sjcphs.org/assets/20200319_PR_SJCPHS%20ANNOUNCES%20FIRST%20DEATHS%20IN%20THE%20COUNTY%20RELATED%20TO%20COVID-19.pdf">http://www.sjcphs.org/assets/20200319_PR_SJCPHS%20ANNOUNCES%20FIRST%20DEATHS%20IN%20THE%20COUNTY%20RELATED%20TO%20COVID-19.pdf</a>                                                                                                                                   |
| San Joaquin   | 19-Mar-20 | <a href="https://www.gov.ca.gov/wp-content/uploads/2020/03/3.19.20-attested-EO-N-33-20-COVID-19-HEALTH-ORDER.pdf">https://www.gov.ca.gov/wp-content/uploads/2020/03/3.19.20-attested-EO-N-33-20-COVID-19-HEALTH-ORDER.pdf</a>                                                                                                                                                                                 |
| San Joaquin   | 25-Mar-20 | <a href="https://www.recordnet.com/news/20200325/stockton-sj-close-all-parks-amid-coronavirus-pandemic">https://www.recordnet.com/news/20200325/stockton-sj-close-all-parks-amid-coronavirus-pandemic</a>                                                                                                                                                                                                     |
| San Joaquin   | 9-Apr-20  | <a href="http://www.sjcphs.org/assets/20200409%20PHS%20NR%20RECOMMENDATIONS%20FOR%20HOLIDAY%20CELEBRATIONS%20FAITH%20BASED%20SERVICES%20COVID%2019%20PANDEMI C.pdf">http://www.sjcphs.org/assets/20200409%20PHS%20NR%20RECOMMENDATIONS%20FOR%20HOLIDAY%20CELEBRATIONS%20FAITH%20BASED%20SERVICES%20COVID%2019%20PANDEMI C.pdf</a>                                                                             |
| San Joaquin   | 11-Apr-20 | <a href="http://www.sjcphs.org/assets/20200421_PR_Recommendations%20for%20Use%20of%20Face%20Coverings%20from%20SICPHS_Officer_Updated.pdf">http://www.sjcphs.org/assets/20200421_PR_Recommendations%20for%20Use%20of%20Face%20Coverings%20from%20SICPHS_Officer_Updated.pdf</a>                                                                                                                               |
| San Joaquin   | 14-Apr-20 | <a href="https://www.sanjoaquingeneral.org/media/20200414_Final%20Signed%20Order%20Stay%20at%20Home.pdf">https://www.sanjoaquingeneral.org/media/20200414_Final%20Signed%20Order%20Stay%20at%20Home.pdf</a>                                                                                                                                                                                                   |
| San Joaquin   | 24-Apr-20 | <a href="https://web.archive.org/web/20200503030828/http://www.sjcphs.org/assets/20200424_SJC%20New%20Public%20Health%20Order%20Update%20Requirements%20with%20Amendme nt%20to%20Order%20Exhibit%20A.pdf">https://web.archive.org/web/20200503030828/http://www.sjcphs.org/assets/20200424_SJC%20New%20Public%20Health%20Order%20Update%20Requirements%20with%20Amendme nt%20to%20Order%20Exhibit%20A.pdf</a> |
| San Joaquin   | 7-May-20  | <a href="http://www.sjcphs.org/documents/20200507_COVID-19%20Guidance%20for%20Businesses%20and%20Employers%2020200507.pdf">http://www.sjcphs.org/documents/20200507_COVID-19%20Guidance%20for%20Businesses%20and%20Employers%2020200507.pdf</a>                                                                                                                                                               |
| San Joaquin   | 8-May-20  | <a href="http://www.sjcphs.org/documents/20200508%20Combined%20Order%20and%20all%20attachments.pdf">http://www.sjcphs.org/documents/20200508%20Combined%20Order%20and%20all%20attachments.pdf</a>                                                                                                                                                                                                             |
| San Joaquin   | 12-May-20 | <a href="http://www.sjcphs.org/assets/20200513_PR_PHS%20CREATES%20VISUAL%20AID%20FOR%20ROADMAP%20TO%20RECOVERY%20FROM%20COVID-19%20PANDEMIC.pdf">http://www.sjcphs.org/assets/20200513_PR_PHS%20CREATES%20VISUAL%20AID%20FOR%20ROADMAP%20TO%20RECOVERY%20FROM%20COVID-19%20PANDEMIC.pdf</a>                                                                                                                   |
| San Joaquin   | 18-May-20 | <a href="https://www.escalontimes.com/news/county-parks-prepare-re-open-may-18/">https://www.escalontimes.com/news/county-parks-prepare-re-open-may-18/</a>                                                                                                                                                                                                                                                   |
| San Joaquin   | 21-May-20 | <a href="http://www.sjcphs.org/assets/20200522_SJC%20Attestation%20Press%20Release%20FINAL.pdf">http://www.sjcphs.org/assets/20200522_SJC%20Attestation%20Press%20Release%20FINAL.pdf</a>                                                                                                                                                                                                                     |

|                 |           |                                                                                                                                                                                                                                                                                                                                                                                                                                                                                                                                                                                       |
|-----------------|-----------|---------------------------------------------------------------------------------------------------------------------------------------------------------------------------------------------------------------------------------------------------------------------------------------------------------------------------------------------------------------------------------------------------------------------------------------------------------------------------------------------------------------------------------------------------------------------------------------|
| San Joaquin     | 26-May-20 | <a href="http://www.sjcphs.org/documents/20200526_PHO_Approval%20of%20religious%20services%20and%20activities%20at%20places%20of%20worship%20within%20SJC.pdf">http://www.sjcphs.org/documents/20200526_PHO_Approval%20of%20religious%20services%20and%20activities%20at%20places%20of%20worship%20within%20SJC.pdf</a>                                                                                                                                                                                                                                                               |
| San Joaquin     | 11-Jun-20 | <a href="https://www.sjgov.org/WorkArea/DownloadAsset.aspx?id=32463">https://www.sjgov.org/WorkArea/DownloadAsset.aspx?id=32463</a>                                                                                                                                                                                                                                                                                                                                                                                                                                                   |
| San Joaquin     | 16-Jun-20 | <a href="http://www.sjcphs.org/assets/20200616_PR_RevisedOrder_Gyms_6_16.pdf">http://www.sjcphs.org/assets/20200616_PR_RevisedOrder_Gyms_6_16.pdf</a>                                                                                                                                                                                                                                                                                                                                                                                                                                 |
| San Joaquin     | 18-Jun-20 | <a href="https://www.cdph.ca.gov/Programs/CID/DCDC/CDPH%20Document%20Library/COVID-19/Guidance-for-Face-Coverings_06-18-2020.pdf">https://www.cdph.ca.gov/Programs/CID/DCDC/CDPH%20Document%20Library/COVID-19/Guidance-for-Face-Coverings_06-18-2020.pdf</a>                                                                                                                                                                                                                                                                                                                         |
| San Joaquin     | 18-Jun-20 | <a href="http://www.sjcphs.org/assets/20200618_PR_RevisedOrder_Bucket2.pdf">http://www.sjcphs.org/assets/20200618_PR_RevisedOrder_Bucket2.pdf</a>                                                                                                                                                                                                                                                                                                                                                                                                                                     |
| San Joaquin     | 28-Jun-20 | <a href="https://sacramento.cbslocal.com/2020/06/28/newsom-counties-close-bars-san-joaquin/">https://sacramento.cbslocal.com/2020/06/28/newsom-counties-close-bars-san-joaquin/</a>                                                                                                                                                                                                                                                                                                                                                                                                   |
| San Joaquin     | 2-Jul-20  | <a href="http://www.sjready.org/assets/docs/covid/SJC_Order_Stay_at_Home_20200702.pdf">http://www.sjready.org/assets/docs/covid/SJC_Order_Stay_at_Home_20200702.pdf</a>                                                                                                                                                                                                                                                                                                                                                                                                               |
| San Joaquin     | 13-Jul-20 | <a href="https://www.latimes.com/california/story/2020-07-13/newsom-california-county-rollback-reopening-coronavirus">https://www.latimes.com/california/story/2020-07-13/newsom-california-county-rollback-reopening-coronavirus</a>                                                                                                                                                                                                                                                                                                                                                 |
| San Joaquin     | 13-Jul-20 | <a href="https://www.sjgov.org/covid19/docs/Stay-At-Home_Order_7-13-2020.pdf">https://www.sjgov.org/covid19/docs/Stay-At-Home_Order_7-13-2020.pdf</a>                                                                                                                                                                                                                                                                                                                                                                                                                                 |
| San Joaquin     | 17-Jul-20 | <a href="https://www.cdph.ca.gov/Programs/CID/DCDC/CDPH%20Document%20Library/COVID-19/Schools%20Reopening%20Recommendations.pdf">https://www.cdph.ca.gov/Programs/CID/DCDC/CDPH%20Document%20Library/COVID-19/Schools%20Reopening%20Recommendations.pdf</a>                                                                                                                                                                                                                                                                                                                           |
| San Joaquin     | 29-Jul-20 | <a href="https://www.sjgov.org/covid19/docs/school%20revision%207_29.pdf">https://www.sjgov.org/covid19/docs/school%20revision%207_29.pdf</a>                                                                                                                                                                                                                                                                                                                                                                                                                                         |
| San Joaquin     | 28-Aug-20 | <a href="https://www.sjgov.org/covid19/docs/sjc%20blueprint%20pr%208-28-20.pdf">https://www.sjgov.org/covid19/docs/sjc%20blueprint%20pr%208-28-20.pdf</a>                                                                                                                                                                                                                                                                                                                                                                                                                             |
| San Joaquin     | 22-Sep-20 | <a href="https://files.covid19.ca.gov/pdf/guidance-expanded-personal-care-services--en.pdf">https://files.covid19.ca.gov/pdf/guidance-expanded-personal-care-services--en.pdf</a>                                                                                                                                                                                                                                                                                                                                                                                                     |
| San Joaquin     | 29-Sep-20 | <a href="https://www.lodinews.com/news/article_1dd62202-02d5-11eb-932f-1b2e3ad3820a.html">https://www.lodinews.com/news/article_1dd62202-02d5-11eb-932f-1b2e3ad3820a.html</a>                                                                                                                                                                                                                                                                                                                                                                                                         |
| San Joaquin     | 9-Oct-20  | <a href="https://wp.sbcounty.gov/cao/countywire/?p=9160#:~:text=Private%20outdoor%20gatherings%20of%20three%20households%20now%20allowed%20throughout%20the%20county%2C%20state,-Published%20October%209&amp;text=Private%20outdoor%20gatherings%20of%20people,Gavin%20Newsom%20on%20Friday.">https://wp.sbcounty.gov/cao/countywire/?p=9160#:~:text=Private%20outdoor%20gatherings%20of%20three%20households%20now%20allowed%20throughout%20the%20county%2C%20state,-Published%20October%209&amp;text=Private%20outdoor%20gatherings%20of%20people,Gavin%20Newsom%20on%20Friday.</a> |
| San Joaquin     | 13-Nov-20 | <a href="https://www.cdph.ca.gov/Programs/CID/DCDC/Pages/COVID-19/Guidance-for-the-Prevention-of-COVID-19-Transmission-for-Gatherings-November-2020.aspx">https://www.cdph.ca.gov/Programs/CID/DCDC/Pages/COVID-19/Guidance-for-the-Prevention-of-COVID-19-Transmission-for-Gatherings-November-2020.aspx</a>                                                                                                                                                                                                                                                                         |
| San Joaquin     | 16-Nov-20 | <a href="https://www.cdph.ca.gov/Programs/CID/DCDC/Pages/COVID-19/guidance-for-face-coverings.aspx">https://www.cdph.ca.gov/Programs/CID/DCDC/Pages/COVID-19/guidance-for-face-coverings.aspx</a>                                                                                                                                                                                                                                                                                                                                                                                     |
| San Joaquin     | 17-Nov-20 | <a href="http://www.sjcphs.org/assets/20201116_PR_SJC%20Back%20Into%20Purple%20Tier.pdf">http://www.sjcphs.org/assets/20201116_PR_SJC%20Back%20Into%20Purple%20Tier.pdf</a>                                                                                                                                                                                                                                                                                                                                                                                                           |
| San Joaquin     | 19-Nov-20 | <a href="https://www.cdph.ca.gov/Programs/CID/DCDC/Pages/COVID-19/limited-stay-at-home-order.aspx">https://www.cdph.ca.gov/Programs/CID/DCDC/Pages/COVID-19/limited-stay-at-home-order.aspx</a>                                                                                                                                                                                                                                                                                                                                                                                       |
| San Joaquin     | 5-Dec-20  | <a href="https://www.gov.ca.gov/wp-content/uploads/2020/12/12.3.20-Stay-at-Home-Order-ICU-Scenario.pdf">https://www.gov.ca.gov/wp-content/uploads/2020/12/12.3.20-Stay-at-Home-Order-ICU-Scenario.pdf</a>                                                                                                                                                                                                                                                                                                                                                                             |
| San Luis Obispo | 11-Mar-20 | <a href="https://www.slocounty.ca.gov/Departments/Health-Agency/Public-Health/Department-News/COVID-19-Updates/Spartan-Race-Cancelled-at-Recommendation-of-County.aspx">https://www.slocounty.ca.gov/Departments/Health-Agency/Public-Health/Department-News/COVID-19-Updates/Spartan-Race-Cancelled-at-Recommendation-of-County.aspx</a>                                                                                                                                                                                                                                             |
| San Luis Obispo | 13-Mar-20 | <a href="https://www.slocounty.ca.gov/Departments/Health-Agency/Public-Health/Department-News/COVID-19-Updates/County-of-SLO-Declares-Public-Health-Emergency,-Lo.aspx">https://www.slocounty.ca.gov/Departments/Health-Agency/Public-Health/Department-News/COVID-19-Updates/County-of-SLO-Declares-Public-Health-Emergency,-Lo.aspx</a>                                                                                                                                                                                                                                             |
| San Luis Obispo | 16-Mar-20 | <a href="https://www.slocounty.ca.gov/Departments/Health-Agency/Public-Health/Department-News/COVID-19-Updates/SLO-County-Issues-Executive-Order-to-Limit-Spread.aspx">https://www.slocounty.ca.gov/Departments/Health-Agency/Public-Health/Department-News/COVID-19-Updates/SLO-County-Issues-Executive-Order-to-Limit-Spread.aspx</a>                                                                                                                                                                                                                                               |
| San Luis Obispo | 18-Mar-20 | <a href="https://www.emergencyslo.org/en/resources/Current-Emergency-Information/Documents/Local-Emergency-Order-and-Regulation-No.-4-COVID-19.pdf">https://www.emergencyslo.org/en/resources/Current-Emergency-Information/Documents/Local-Emergency-Order-and-Regulation-No.-4-COVID-19.pdf</a>                                                                                                                                                                                                                                                                                     |
| San Luis Obispo | 18-Mar-20 | <a href="https://www.slocounty.ca.gov/Departments/Health-Agency/Public-Health/Department-News/COVID-19-Updates/County-Issues-Order-Suspending-Evictions-for-Renta.aspx">https://www.slocounty.ca.gov/Departments/Health-Agency/Public-Health/Department-News/COVID-19-Updates/County-Issues-Order-Suspending-Evictions-for-Renta.aspx</a>                                                                                                                                                                                                                                             |
| San Luis Obispo | 18-Mar-20 | <a href="https://www.slocounty.ca.gov/Departments/Health-Agency/Public-Health/Department-News/COVID-19-Updates/County-of-San-Luis-Obispo-Public-Libraries-to-Clos.aspx">https://www.slocounty.ca.gov/Departments/Health-Agency/Public-Health/Department-News/COVID-19-Updates/County-of-San-Luis-Obispo-Public-Libraries-to-Clos.aspx</a>                                                                                                                                                                                                                                             |



|                 |           |                                                                                                                                                                                                                                                                                                                                                                                                                                                                                                                                                                                             |
|-----------------|-----------|---------------------------------------------------------------------------------------------------------------------------------------------------------------------------------------------------------------------------------------------------------------------------------------------------------------------------------------------------------------------------------------------------------------------------------------------------------------------------------------------------------------------------------------------------------------------------------------------|
| San Luis Obispo | 19-Mar-20 | <a href="https://www.gov.ca.gov/wp-content/uploads/2020/03/3.19.20-attested-EO-N-33-20-COVID-19-HEALTH-ORDER.pdf">https://www.gov.ca.gov/wp-content/uploads/2020/03/3.19.20-attested-EO-N-33-20-COVID-19-HEALTH-ORDER.pdf</a>                                                                                                                                                                                                                                                                                                                                                               |
| San Luis Obispo | 26-Mar-20 | <a href="https://www.slocounty.ca.gov/Departments/Health-Agency/Public-Health/Department-News/COVID-19-Updates/Actions-Taken-to-Limit-Access-to-Campgrounds-and-B.aspx">https://www.slocounty.ca.gov/Departments/Health-Agency/Public-Health/Department-News/COVID-19-Updates/Actions-Taken-to-Limit-Access-to-Campgrounds-and-B.aspx</a>                                                                                                                                                                                                                                                   |
| San Luis Obispo | 26-Mar-20 | <a href="https://www.slocounty.ca.gov/Departments/Health-Agency/Public-Health/Forms-Documents/Communications/COVID-19-Health-Officer-Orders/03-26-2020-Health-Officer-Order-No-1_residential-c.pdf">https://www.slocounty.ca.gov/Departments/Health-Agency/Public-Health/Forms-Documents/Communications/COVID-19-Health-Officer-Orders/03-26-2020-Health-Officer-Order-No-1_residential-c.pdf</a>                                                                                                                                                                                           |
| San Luis Obispo | 2-Apr-20  | <a href="https://www.slocounty.ca.gov/Departments/Health-Agency/Public-Health/Department-News/COVID-19-Updates/County-Continues-Executive-Order-to-Shelter-at-Hom.aspx">https://www.slocounty.ca.gov/Departments/Health-Agency/Public-Health/Department-News/COVID-19-Updates/County-Continues-Executive-Order-to-Shelter-at-Hom.aspx</a>                                                                                                                                                                                                                                                   |
| San Luis Obispo | 3-Apr-20  | <a href="https://www.slocounty.ca.gov/Departments/Health-Agency/Public-Health/Department-News/COVID-19-Updates/Important-Notice-Regarding-COVID-19-and-SLO-County.aspx">https://www.slocounty.ca.gov/Departments/Health-Agency/Public-Health/Department-News/COVID-19-Updates/Important-Notice-Regarding-COVID-19-and-SLO-County.aspx</a>                                                                                                                                                                                                                                                   |
| San Luis Obispo | 16-Apr-20 | <a href="https://www.slocounty.ca.gov/Departments/Health-Agency/Public-Health/Department-News/COVID-19-Updates/County-Continues-Executive-Order-to-Shelter-at-(1).aspx">https://www.slocounty.ca.gov/Departments/Health-Agency/Public-Health/Department-News/COVID-19-Updates/County-Continues-Executive-Order-to-Shelter-at-(1).aspx</a>                                                                                                                                                                                                                                                   |
| San Luis Obispo | 20-Apr-20 | <a href="https://www.slocounty.ca.gov/Departments/Health-Agency/Public-Health/Department-News/COVID-19-Updates/County-Provides-Guidance-on-Specific-Activities-Un.aspx">https://www.slocounty.ca.gov/Departments/Health-Agency/Public-Health/Department-News/COVID-19-Updates/County-Provides-Guidance-on-Specific-Activities-Un.aspx</a>                                                                                                                                                                                                                                                   |
| San Luis Obispo | 22-Apr-20 | <a href="https://www.slocounty.ca.gov/Departments/Health-Agency/Public-Health/Department-News/COVID-19-Updates/County-Clarifies-Shelter-at-Home-Order-Guidance.aspx">https://www.slocounty.ca.gov/Departments/Health-Agency/Public-Health/Department-News/COVID-19-Updates/County-Clarifies-Shelter-at-Home-Order-Guidance.aspx</a>                                                                                                                                                                                                                                                         |
| San Luis Obispo | 16-May-20 | <a href="https://www.emergencyslo.org/en/resourcesGeneral/Public-Health-Order-No.-6-1-ADA-Compliant.pdf">https://www.emergencyslo.org/en/resourcesGeneral/Public-Health-Order-No.-6-1-ADA-Compliant.pdf</a>                                                                                                                                                                                                                                                                                                                                                                                 |
| San Luis Obispo | 20-May-20 | <a href="https://www.slocounty.ca.gov/Departments/Health-Agency/Public-Health/Department-News/COVID-19-Updates/SLO-County-Can-Start-In-Store-Shopping,-Dining-in.aspx">https://www.slocounty.ca.gov/Departments/Health-Agency/Public-Health/Department-News/COVID-19-Updates/SLO-County-Can-Start-In-Store-Shopping,-Dining-in.aspx</a>                                                                                                                                                                                                                                                     |
| San Luis Obispo | 26-May-20 | <a href="https://www.slocounty.ca.gov/Departments/Health-Agency/Public-Health/Department-News/COVID-19-Updates/Places-of-Worship,-Hair-Salons-and-Barbershops-Can.aspx">https://www.slocounty.ca.gov/Departments/Health-Agency/Public-Health/Department-News/COVID-19-Updates/Places-of-Worship,-Hair-Salons-and-Barbershops-Can.aspx</a>                                                                                                                                                                                                                                                   |
| San Luis Obispo | 29-May-20 | <a href="https://www.slocounty.ca.gov/Departments/Health-Agency/Public-Health/Department-News/COVID-19-Updates/Select-County-Library-Branches-to-Begin-Staged-Reo.aspx">https://www.slocounty.ca.gov/Departments/Health-Agency/Public-Health/Department-News/COVID-19-Updates/Select-County-Library-Branches-to-Begin-Staged-Reo.aspx</a>                                                                                                                                                                                                                                                   |
| San Luis Obispo | 5-Jun-20  | <a href="https://www.slocounty.ca.gov/Departments/Health-Agency/Public-Health/Forms-Documents/Communications/COVID-19-Health-Officer-Orders/HEALTH-OFFICER-ORDER-VISITATION-(final)-(6-5-20).pdf">https://www.slocounty.ca.gov/Departments/Health-Agency/Public-Health/Forms-Documents/Communications/COVID-19-Health-Officer-Orders/HEALTH-OFFICER-ORDER-VISITATION-(final)-(6-5-20).pdf</a>                                                                                                                                                                                               |
| San Luis Obispo | 17-Jun-20 | <a href="https://www.slocounty.ca.gov/Departments/Health-Agency/Public-Health/Department-News/COVID-19-Updates/Personal-Care-Services-Can-Reopen-with-Modificatio.aspx">https://www.slocounty.ca.gov/Departments/Health-Agency/Public-Health/Department-News/COVID-19-Updates/Personal-Care-Services-Can-Reopen-with-Modificatio.aspx</a>                                                                                                                                                                                                                                                   |
| San Luis Obispo | 18-Jun-20 | <a href="https://www.cdph.ca.gov/Programs/CID/DCDC/CDPH%20Document%20Library/COVID-19/Guidance-for-Face-Coverings_06-18-2020.pdf">https://www.cdph.ca.gov/Programs/CID/DCDC/CDPH%20Document%20Library/COVID-19/Guidance-for-Face-Coverings_06-18-2020.pdf</a>                                                                                                                                                                                                                                                                                                                               |
| San Luis Obispo | 24-Jun-20 | <a href="https://www.slocounty.ca.gov/Departments/Health-Agency/Public-Health/Department-News/COVID-19-Updates/County-to-Triple-Contact-Tracing-Team-to-Help-in-F.aspx">https://www.slocounty.ca.gov/Departments/Health-Agency/Public-Health/Department-News/COVID-19-Updates/County-to-Triple-Contact-Tracing-Team-to-Help-in-F.aspx</a>                                                                                                                                                                                                                                                   |
| San Luis Obispo | 3-Jul-20  | <a href="https://www.emergencyslo.org/en/resourcesGeneral/Health-Officer-Order-No-3-Temporary-Bar-Closure---ADA.pdf">https://www.emergencyslo.org/en/resourcesGeneral/Health-Officer-Order-No-3-Temporary-Bar-Closure---ADA.pdf</a>                                                                                                                                                                                                                                                                                                                                                         |
| San Luis Obispo | 13-Jul-20 | <a href="https://www.slocounty.ca.gov/Departments/Health-Agency/Public-Health/Department-News/COVID-19-Updates/State-Orders-More-Business-Sector-Closures-for-SLO.aspx">https://www.slocounty.ca.gov/Departments/Health-Agency/Public-Health/Department-News/COVID-19-Updates/State-Orders-More-Business-Sector-Closures-for-SLO.aspx</a>                                                                                                                                                                                                                                                   |
| San Luis Obispo | 13-Jul-20 | <a href="https://www.latimes.com/california/story/2020-07-13/newsom-california-county-rollback-reopening-coronavirus">https://www.latimes.com/california/story/2020-07-13/newsom-california-county-rollback-reopening-coronavirus</a>                                                                                                                                                                                                                                                                                                                                                       |
| San Luis Obispo | 17-Jul-20 | <a href="https://www.cdph.ca.gov/Programs/CID/DCDC/CDPH%20Document%20Library/COVID-19/Schools%20Reopening%20Recommendations.pdf">https://www.cdph.ca.gov/Programs/CID/DCDC/CDPH%20Document%20Library/COVID-19/Schools%20Reopening%20Recommendations.pdf</a>                                                                                                                                                                                                                                                                                                                                 |
| San Luis Obispo | 28-Aug-20 | <a href="https://abc7news.com/ca-reopneing-phases-covid19cagov-gavin-newsom-update-california-salon-reopening/6393805/">https://abc7news.com/ca-reopneing-phases-covid19cagov-gavin-newsom-update-california-salon-reopening/6393805/</a>                                                                                                                                                                                                                                                                                                                                                   |
| San Luis Obispo | 21-Sep-20 | <a href="https://www.emergencyslo.org/en/resourcesGeneral/Rescission-of-Restriction-on-Visitors-to-Skilled-Nursing-Facilities.pdf">https://www.emergencyslo.org/en/resourcesGeneral/Rescission-of-Restriction-on-Visitors-to-Skilled-Nursing-Facilities.pdf</a>                                                                                                                                                                                                                                                                                                                             |
| San Luis Obispo | 22-Sep-20 | <a href="https://projects.sfchronicle.com/2020/coronavirus-map/california-reopening/">https://projects.sfchronicle.com/2020/coronavirus-map/california-reopening/</a>                                                                                                                                                                                                                                                                                                                                                                                                                       |
| San Luis Obispo | 9-Oct-20  | <a href="https://wp.sbcounty.gov/cao/countywire/?p=9160#:~:text=Private%20outdoor%20gatherings%20of%20three%20households%20now%20allowed%20t%20hroughout%20the%20county%2C%20state,-Published%20October%209&amp;text=Private%20outdoor%20gatherings%20of%20people,Gavin%20Newsom%20on%20Friday.">https://wp.sbcounty.gov/cao/countywire/?p=9160#:~:text=Private%20outdoor%20gatherings%20of%20three%20households%20now%20allowed%20t%20hroughout%20the%20county%2C%20state,-Published%20October%209&amp;text=Private%20outdoor%20gatherings%20of%20people,Gavin%20Newsom%20on%20Friday.</a> |
| San Luis Obispo | 28-Oct-20 | <a href="https://www.emergencyslo.org/en/resourcesGeneral/Health-Officer-Order-5.pdf">https://www.emergencyslo.org/en/resourcesGeneral/Health-Officer-Order-5.pdf</a>                                                                                                                                                                                                                                                                                                                                                                                                                       |
| San Luis Obispo | 28-Oct-20 | <a href="https://www.emergencyslo.org/en/resourcesGeneral/Health-Officer-Order-4.pdf">https://www.emergencyslo.org/en/resourcesGeneral/Health-Officer-Order-4.pdf</a>                                                                                                                                                                                                                                                                                                                                                                                                                       |

|                 |           |                                                                                                                                                                                                                                                                                                               |
|-----------------|-----------|---------------------------------------------------------------------------------------------------------------------------------------------------------------------------------------------------------------------------------------------------------------------------------------------------------------|
| San Luis Obispo | 13-Nov-20 | <a href="https://www.cdph.ca.gov/Programs/CID/DCDC/Pages/COVID-19/Guidance-for-the-Prevention-of-COVID-19-Transmission-for-Gatherings-November-2020.aspx">https://www.cdph.ca.gov/Programs/CID/DCDC/Pages/COVID-19/Guidance-for-the-Prevention-of-COVID-19-Transmission-for-Gatherings-November-2020.aspx</a> |
| San Luis Obispo | 16-Nov-20 | <a href="https://www.cdph.ca.gov/Programs/CID/DCDC/Pages/COVID-19/guidance-for-face-coverings.aspx">https://www.cdph.ca.gov/Programs/CID/DCDC/Pages/COVID-19/guidance-for-face-coverings.aspx</a>                                                                                                             |
| San Luis Obispo | 17-Nov-20 | <a href="https://kmpb.com/news/local/40-california-counties-in-purple-tier-including-the-central-valley">https://kmpb.com/news/local/40-california-counties-in-purple-tier-including-the-central-valley</a>                                                                                                   |
| San Luis Obispo | 19-Nov-20 | <a href="https://www.cdph.ca.gov/Programs/CID/DCDC/Pages/COVID-19/limited-stay-at-home-order.aspx">https://www.cdph.ca.gov/Programs/CID/DCDC/Pages/COVID-19/limited-stay-at-home-order.aspx</a>                                                                                                               |
| San Luis Obispo | 5-Dec-20  | <a href="https://www.gov.ca.gov/wp-content/uploads/2020/12/12.3.20-Stay-at-Home-Order-ICU-Scenario.pdf">https://www.gov.ca.gov/wp-content/uploads/2020/12/12.3.20-Stay-at-Home-Order-ICU-Scenario.pdf</a>                                                                                                     |
| San Mateo       | 5-Mar-20  | <a href="https://www.smchealth.org/health-officer-updates/march-5-2020-health-officer-statement">https://www.smchealth.org/health-officer-updates/march-5-2020-health-officer-statement</a>                                                                                                                   |
| San Mateo       | 10-Mar-20 | <a href="https://almanacnews.com/news/2020/03/10/san-mateo-county-in-state-of-emergency-due-to-coronavirus?isFollow=0">https://almanacnews.com/news/2020/03/10/san-mateo-county-in-state-of-emergency-due-to-coronavirus?isFollow=0</a>                                                                       |
| San Mateo       | 11-Mar-20 | <a href="https://www.smchealth.org/sites/main/files/file-attachments/31120_english.pdf?1585787563">https://www.smchealth.org/sites/main/files/file-attachments/31120_english.pdf?1585787563</a>                                                                                                               |
| San Mateo       | 12-Mar-20 | <a href="https://www.smchealth.org/sites/main/files/file-attachments/031220_english.pdf?1585787667">https://www.smchealth.org/sites/main/files/file-attachments/031220_english.pdf?1585787667</a>                                                                                                             |
| San Mateo       | 13-Mar-20 | <a href="https://www.smchealth.org/sites/main/files/file-attachments/031320_english.pdf?1585787754">https://www.smchealth.org/sites/main/files/file-attachments/031320_english.pdf?1585787754</a>                                                                                                             |
| San Mateo       | 14-Mar-20 | <a href="https://www.smchealth.org/sites/main/files/file-attachments/031420_english.pdf?1585787850">https://www.smchealth.org/sites/main/files/file-attachments/031420_english.pdf?1585787850</a>                                                                                                             |
| San Mateo       | 16-Mar-20 | <a href="https://www.smchealth.org/sites/main/files/file-attachments/031620_english.pdf?1585788135">https://www.smchealth.org/sites/main/files/file-attachments/031620_english.pdf?1585788135</a>                                                                                                             |
| San Mateo       | 19-Mar-20 | <a href="https://www.gov.ca.gov/wp-content/uploads/2020/03/3.19.20-attested-EO-N-33-20-COVID-19-HEALTH-ORDER.pdf">https://www.gov.ca.gov/wp-content/uploads/2020/03/3.19.20-attested-EO-N-33-20-COVID-19-HEALTH-ORDER.pdf</a>                                                                                 |
| San Mateo       | 24-Mar-20 | <a href="https://www.smchealth.org/sites/main/files/file-attachments/032420_english.pdf?1585788299">https://www.smchealth.org/sites/main/files/file-attachments/032420_english.pdf?1585788299</a>                                                                                                             |
| San Mateo       | 25-Mar-20 | <a href="https://www.mercurynews.com/2020/03/25/bay-area-counties-extend-school-closures-through-may-1/">https://www.mercurynews.com/2020/03/25/bay-area-counties-extend-school-closures-through-may-1/</a>                                                                                                   |
| San Mateo       | 31-Mar-20 | <a href="https://www.smchealth.org/sites/main/files/file-attachments/033120_english.pdf?1585788430">https://www.smchealth.org/sites/main/files/file-attachments/033120_english.pdf?1585788430</a>                                                                                                             |
| San Mateo       | 6-Apr-20  | <a href="https://www.smchealth.org/sites/main/files/file-attachments/ho_order_c19-7_home_quarantine_20200406.pdf?1586220378">https://www.smchealth.org/sites/main/files/file-attachments/ho_order_c19-7_home_quarantine_20200406.pdf?1586220378</a>                                                           |
| San Mateo       | 6-Apr-20  | <a href="https://www.smchealth.org/sites/main/files/file-attachments/ho_order_c19-6_home_isolation_20200406.pdf?1586220329">https://www.smchealth.org/sites/main/files/file-attachments/ho_order_c19-6_home_isolation_20200406.pdf?1586220329</a>                                                             |
| San Mateo       | 13-Apr-20 | <a href="https://www.smchealth.org/sites/main/files/file-attachments/ho_order_c19-3c_2nd_revised_20200413_1.pdf?1586906900">https://www.smchealth.org/sites/main/files/file-attachments/ho_order_c19-3c_2nd_revised_20200413_1.pdf?1586906900</a>                                                             |
| San Mateo       | 15-Apr-20 | <a href="https://www.smchealth.org/sites/main/files/file-attachments/ho_order_c19-1b_ltc_revised_20200415.pdf?1586994187">https://www.smchealth.org/sites/main/files/file-attachments/ho_order_c19-1b_ltc_revised_20200415.pdf?1586994187</a>                                                                 |
| San Mateo       | 17-Apr-20 | <a href="https://www.smchealth.org/sites/main/files/file-attachments/ho_order_c19-8_face_covering_20200417_copy.pdf?1587328957">https://www.smchealth.org/sites/main/files/file-attachments/ho_order_c19-8_face_covering_20200417_copy.pdf?1587328957</a>                                                     |
| San Mateo       | 29-Apr-20 | <a href="https://www.smchealth.org/sites/main/files/file-attachments/health_officer_order_revising_shelter_in_place_through_may_31_1.pdf?1588200596">https://www.smchealth.org/sites/main/files/file-attachments/health_officer_order_revising_shelter_in_place_through_may_31_1.pdf?1588200596</a>           |
| San Mateo       | 11-May-20 | <a href="https://www.smchealth.org/sites/main/files/file-attachments/ho_order_c19-9_allow_car_based_gathering_20200511.pdf?1589228227">https://www.smchealth.org/sites/main/files/file-attachments/ho_order_c19-9_allow_car_based_gathering_20200511.pdf?1589228227</a>                                       |
| San Mateo       | 13-May-20 | <a href="https://www.smchealth.org/sites/main/files/file-attachments/ho_order_c19-10_optum_test_sites_20200513.pdf?1589406725">https://www.smchealth.org/sites/main/files/file-attachments/ho_order_c19-10_optum_test_sites_20200513.pdf?1589406725</a>                                                       |
| San Mateo       | 13-May-20 | <a href="https://www.smchealth.org/sites/main/files/file-attachments/ho_order_c19-5d_shelter_in_place_20200515.pdf?1589577658">https://www.smchealth.org/sites/main/files/file-attachments/ho_order_c19-5d_shelter_in_place_20200515.pdf?1589577658</a>                                                       |
| San Mateo       | 14-May-20 | <a href="https://www.smchealth.org/sites/main/files/file-attachments/ho_order_c19-6b_home_isolation_revised_20200514.pdf?1589557344">https://www.smchealth.org/sites/main/files/file-attachments/ho_order_c19-6b_home_isolation_revised_20200514.pdf?1589557344</a>                                           |

|               |           |                                                                                                                                                                                                                                                                                                                                                                                                                                                                                                                                                                                       |
|---------------|-----------|---------------------------------------------------------------------------------------------------------------------------------------------------------------------------------------------------------------------------------------------------------------------------------------------------------------------------------------------------------------------------------------------------------------------------------------------------------------------------------------------------------------------------------------------------------------------------------------|
| San Mateo     | 19-May-20 | <a href="https://www.smchealth.org/sites/main/files/file-attachments/ho_order_c19-8b_face_covering_revised_final.pdf?1589988744">https://www.smchealth.org/sites/main/files/file-attachments/ho_order_c19-8b_face_covering_revised_final.pdf?1589988744</a>                                                                                                                                                                                                                                                                                                                           |
| San Mateo     | 20-May-20 | <a href="https://cmo.smcgov.org/press-release/may-20-2020-health-officer%E2%80%99s-phase-2-order-allows-childcare-safety-requirements">https://cmo.smcgov.org/press-release/may-20-2020-health-officer%E2%80%99s-phase-2-order-allows-childcare-safety-requirements</a>                                                                                                                                                                                                                                                                                                               |
| San Mateo     | 22-May-20 | <a href="https://www.smchealth.org/sites/main/files/file-attachments/ho_order_c19-5d_appendix_c-2_allowed_additional_activities_revised_20200522.pdf?1590196809">https://www.smchealth.org/sites/main/files/file-attachments/ho_order_c19-5d_appendix_c-2_allowed_additional_activities_revised_20200522.pdf?1590196809</a>                                                                                                                                                                                                                                                           |
| San Mateo     | 28-May-20 | <a href="https://www.smchealth.org/sites/main/files/file-attachments/ho_order_c19-5e_shelter_in_place_20200528.pdf?1590717370">https://www.smchealth.org/sites/main/files/file-attachments/ho_order_c19-5e_shelter_in_place_20200528.pdf?1590717370</a>                                                                                                                                                                                                                                                                                                                               |
| San Mateo     | 4-Jun-20  | <a href="https://www.smchealth.org/sites/main/files/file-attachments/ho_order_c19-5f_shelter_in_place_20200604.pdf?1591297523">https://www.smchealth.org/sites/main/files/file-attachments/ho_order_c19-5f_shelter_in_place_20200604.pdf?1591297523</a>                                                                                                                                                                                                                                                                                                                               |
| San Mateo     | 15-Jun-20 | <a href="https://www.smchealth.org/sites/main/files/file-attachments/ho_order_c19-1c_ltc_revised_updated_20200615.pdf?1592409252">https://www.smchealth.org/sites/main/files/file-attachments/ho_order_c19-1c_ltc_revised_updated_20200615.pdf?1592409252</a>                                                                                                                                                                                                                                                                                                                         |
| San Mateo     | 17-Jun-20 | <a href="https://www.smchealth.org/sites/main/files/file-attachments/ho_order_c19-11_20200617.pdf?1592431253">https://www.smchealth.org/sites/main/files/file-attachments/ho_order_c19-11_20200617.pdf?1592431253</a>                                                                                                                                                                                                                                                                                                                                                                 |
| San Mateo     | 18-Jun-20 | <a href="https://www.cdph.ca.gov/Programs/CID/DCDC/CDPH%20Document%20Library/COVID-19/Guidance-for-Face-Coverings_06-18-2020.pdf">https://www.cdph.ca.gov/Programs/CID/DCDC/CDPH%20Document%20Library/COVID-19/Guidance-for-Face-Coverings_06-18-2020.pdf</a>                                                                                                                                                                                                                                                                                                                         |
| San Mateo     | 19-Jun-20 | <a href="https://abc7news.com/nail-salons-san-mateo-county-when-can-open-i-get-my-nails-done-salon-reopening-bay-area/6256177/">https://abc7news.com/nail-salons-san-mateo-county-when-can-open-i-get-my-nails-done-salon-reopening-bay-area/6256177/</a>                                                                                                                                                                                                                                                                                                                             |
| San Mateo     | 13-Jul-20 | <a href="https://www.latimes.com/california/story/2020-07-13/newsom-california-county-rollback-reopening-coronavirus">https://www.latimes.com/california/story/2020-07-13/newsom-california-county-rollback-reopening-coronavirus</a>                                                                                                                                                                                                                                                                                                                                                 |
| San Mateo     | 14-Jul-20 | <a href="https://www.smchealth.org/health-officer-updates/order-health-officer-no-c19-1d-long-term-care-facilities-revised">https://www.smchealth.org/health-officer-updates/order-health-officer-no-c19-1d-long-term-care-facilities-revised</a>                                                                                                                                                                                                                                                                                                                                     |
| San Mateo     | 1-Aug-20  | <a href="https://abc7news.com/society/state-orders-san-mateo-co-to-close-specific-indoor-businesses-by-midnight/6347865/">https://abc7news.com/society/state-orders-san-mateo-co-to-close-specific-indoor-businesses-by-midnight/6347865/</a>                                                                                                                                                                                                                                                                                                                                         |
| San Mateo     | 4-Aug-20  | <a href="https://abc7news.com/health/these-ca-cities-will-fine-you-for-not-wearing-a-mask/6331672/">https://abc7news.com/health/these-ca-cities-will-fine-you-for-not-wearing-a-mask/6331672/</a>                                                                                                                                                                                                                                                                                                                                                                                     |
| San Mateo     | 28-Aug-20 | <a href="https://abc7news.com/ca-reopneing-phases-covid19cagov-gavin-newsom-update-california-salon-reopening/6393805/">https://abc7news.com/ca-reopneing-phases-covid19cagov-gavin-newsom-update-california-salon-reopening/6393805/</a>                                                                                                                                                                                                                                                                                                                                             |
| San Mateo     | 22-Sep-20 | <a href="https://projects.sfchronicle.com/2020/coronavirus-map/california-reopening/">https://projects.sfchronicle.com/2020/coronavirus-map/california-reopening/</a>                                                                                                                                                                                                                                                                                                                                                                                                                 |
| San Mateo     | 9-Oct-20  | <a href="https://wp.sbcounty.gov/cao/countywire/?p=9160#:~:text=Private%20outdoor%20gatherings%20of%20three%20households%20now%20allowed%20throughout%20the%20county%2C%20state,-Published%20October%209&amp;text=Private%20outdoor%20gatherings%20of%20people,Gavin%20Newsom%20on%20Friday.">https://wp.sbcounty.gov/cao/countywire/?p=9160#:~:text=Private%20outdoor%20gatherings%20of%20three%20households%20now%20allowed%20throughout%20the%20county%2C%20state,-Published%20October%209&amp;text=Private%20outdoor%20gatherings%20of%20people,Gavin%20Newsom%20on%20Friday.</a> |
| San Mateo     | 27-Oct-20 | <a href="https://cmo.smcgov.org/press-release/oct-27-2020-covid-19-update-state-moves-san-mateo-county-orange-tier">https://cmo.smcgov.org/press-release/oct-27-2020-covid-19-update-state-moves-san-mateo-county-orange-tier</a>                                                                                                                                                                                                                                                                                                                                                     |
| San Mateo     | 29-Oct-20 | <a href="https://www.smchealth.org/sites/main/files/file-attachments/ho_order_c19-7c_home_quarantine_revised_20201029.pdf?1604082896">https://www.smchealth.org/sites/main/files/file-attachments/ho_order_c19-7c_home_quarantine_revised_20201029.pdf?1604082896</a>                                                                                                                                                                                                                                                                                                                 |
| San Mateo     | 29-Oct-20 | <a href="https://www.smchealth.org/sites/main/files/file-attachments/ho_order_c19-6c_home_isolation_revised_20201029.pdf?1604082724">https://www.smchealth.org/sites/main/files/file-attachments/ho_order_c19-6c_home_isolation_revised_20201029.pdf?1604082724</a>                                                                                                                                                                                                                                                                                                                   |
| San Mateo     | 29-Oct-20 | <a href="https://www.smchealth.org/sites/main/files/file-attachments/ho_order_c19-1e_ltc_revised_20201029.pdf?1604014810">https://www.smchealth.org/sites/main/files/file-attachments/ho_order_c19-1e_ltc_revised_20201029.pdf?1604014810</a>                                                                                                                                                                                                                                                                                                                                         |
| San Mateo     | 13-Nov-20 | <a href="https://www.cdph.ca.gov/Programs/CID/DCDC/Pages/COVID-19/Guidance-for-the-Prevention-of-COVID-19-Transmission-for-Gatherings-November-2020.aspx">https://www.cdph.ca.gov/Programs/CID/DCDC/Pages/COVID-19/Guidance-for-the-Prevention-of-COVID-19-Transmission-for-Gatherings-November-2020.aspx</a>                                                                                                                                                                                                                                                                         |
| San Mateo     | 17-Nov-20 | <a href="https://kmpb.com/news/local/40-california-counties-in-purple-tier-including-the-central-valley">https://kmpb.com/news/local/40-california-counties-in-purple-tier-including-the-central-valley</a>                                                                                                                                                                                                                                                                                                                                                                           |
| San Mateo     | 28-Nov-20 | <a href="https://cmo.smcgov.org/press-release/nov-28-2020-indoor-dining-closes-outdoor-gatherings-only-state-moves-san-mateo-county">https://cmo.smcgov.org/press-release/nov-28-2020-indoor-dining-closes-outdoor-gatherings-only-state-moves-san-mateo-county</a>                                                                                                                                                                                                                                                                                                                   |
| San Mateo     | 16-Dec-20 | <a href="https://www.gov.ca.gov/wp-content/uploads/2020/12/12.3.20-Stay-at-Home-Order-ICU-Scenario.pdf">https://www.gov.ca.gov/wp-content/uploads/2020/12/12.3.20-Stay-at-Home-Order-ICU-Scenario.pdf</a>                                                                                                                                                                                                                                                                                                                                                                             |
| Santa Barbara | 12-Mar-20 | <a href="https://countyofsb.org/uploadedFiles/phd/PROGRAMS/Disease_Control/Corona/Declaration%20of%20Health%20Emergency%20for%20COVID-19.pdf">https://countyofsb.org/uploadedFiles/phd/PROGRAMS/Disease_Control/Corona/Declaration%20of%20Health%20Emergency%20for%20COVID-19.pdf</a>                                                                                                                                                                                                                                                                                                 |
| Santa Barbara | 17-Mar-20 | <a href="https://www.noozhawk.com/article/santa_barbara_bars_nightclubs_breweries_winerias_pubs_asked_to_shut_down">https://www.noozhawk.com/article/santa_barbara_bars_nightclubs_breweries_winerias_pubs_asked_to_shut_down</a>                                                                                                                                                                                                                                                                                                                                                     |

|               |           |                                                                                                                                                                                                                                                                                                                                                                                                   |
|---------------|-----------|---------------------------------------------------------------------------------------------------------------------------------------------------------------------------------------------------------------------------------------------------------------------------------------------------------------------------------------------------------------------------------------------------|
| Santa Barbara | 19-Mar-20 | <a href="https://www.gov.ca.gov/wp-content/uploads/2020/03/3.19.20-attested-EO-N-33-20-COVID-19-HEALTH-ORDER.pdf">https://www.gov.ca.gov/wp-content/uploads/2020/03/3.19.20-attested-EO-N-33-20-COVID-19-HEALTH-ORDER.pdf</a>                                                                                                                                                                     |
| Santa Barbara | 23-Mar-20 | <a href="https://countyofsb.org/uploadedFiles/phd/PROGRAMS/Disease_Control/Corona/Health%20Officer%20Order%20No.%202020-4.2.pdf">https://countyofsb.org/uploadedFiles/phd/PROGRAMS/Disease_Control/Corona/Health%20Officer%20Order%20No.%202020-4.2.pdf</a>                                                                                                                                       |
| Santa Barbara | 3-Apr-20  | <a href="https://countyofsb.org/uploadedFiles/phd/PROGRAMS/Disease_Control/Corona/Health%20Officer%20Order%20NO.%202020-6.pdf">https://countyofsb.org/uploadedFiles/phd/PROGRAMS/Disease_Control/Corona/Health%20Officer%20Order%20NO.%202020-6.pdf</a>                                                                                                                                           |
| Santa Barbara | 5-Apr-20  | <a href="https://countyofsb.org/uploadedFiles/phd/PROGRAMS/Disease_Control/Corona/HealthOfficer%20Order%204_5_2020.pdf">https://countyofsb.org/uploadedFiles/phd/PROGRAMS/Disease_Control/Corona/HealthOfficer%20Order%204_5_2020.pdf</a>                                                                                                                                                         |
| Santa Barbara | 10-Apr-20 | <a href="https://countyofsb.org/uploadedFiles/phd/PROGRAMS/Disease_Control/Corona/Signed%20HOO%20Amendment%20on%20Clarifications%20of%20Stay%20At%20Home%20Order%20for%20Selected%20Businesses.pdf">https://countyofsb.org/uploadedFiles/phd/PROGRAMS/Disease_Control/Corona/Signed%20HOO%20Amendment%20on%20Clarifications%20of%20Stay%20At%20Home%20Order%20for%20Selected%20Businesses.pdf</a> |
| Santa Barbara | 21-Apr-20 | <a href="https://countyofsb.org/uploadedFiles/phd/PROGRAMS/Disease_Control/Corona/4.21.2020%202020-9%20Supercedes%20and%20Replaces%20HO%202020-2.pdf">https://countyofsb.org/uploadedFiles/phd/PROGRAMS/Disease_Control/Corona/4.21.2020%202020-9%20Supercedes%20and%20Replaces%20HO%202020-2.pdf</a>                                                                                             |
| Santa Barbara | 24-Apr-20 | <a href="https://countyofsb.org/uploadedFiles/phd/PROGRAMS/Disease_Control/Corona/HO%20Order%202020-8%20Clarification%20of%20Essential%20Businesses.pdf">https://countyofsb.org/uploadedFiles/phd/PROGRAMS/Disease_Control/Corona/HO%20Order%202020-8%20Clarification%20of%20Essential%20Businesses.pdf</a>                                                                                       |
| Santa Barbara | 30-Apr-20 | <a href="https://countyofsb.org/uploadedFiles/phd/PROGRAMS/Disease_Control/Corona/Health%20Officer%20Order%20No.%202020-6.1.pdf">https://countyofsb.org/uploadedFiles/phd/PROGRAMS/Disease_Control/Corona/Health%20Officer%20Order%20No.%202020-6.1.pdf</a>                                                                                                                                       |
| Santa Barbara | 8-May-20  | <a href="https://countyofsb.org/uploadedFiles/phd/PROGRAMS/Disease_Control/Corona/Health%20Officer%20Order%20NO.%202020-8-1.pdf">https://countyofsb.org/uploadedFiles/phd/PROGRAMS/Disease_Control/Corona/Health%20Officer%20Order%20NO.%202020-8-1.pdf</a>                                                                                                                                       |
| Santa Barbara | 21-May-20 | <a href="http://www.countyofsb.org/uploadedFiles/phd/PROGRAMS/Disease_Control/Corona/HOO%202020-8-2Stage2.pdf">http://www.countyofsb.org/uploadedFiles/phd/PROGRAMS/Disease_Control/Corona/HOO%202020-8-2Stage2.pdf</a>                                                                                                                                                                           |
| Santa Barbara | 26-May-20 | <a href="http://countyofsb.org/uploadedFiles/phd/PROGRAMS/Disease_Control/Corona/HOO%202020-8-3.pdf">http://countyofsb.org/uploadedFiles/phd/PROGRAMS/Disease_Control/Corona/HOO%202020-8-3.pdf</a>                                                                                                                                                                                               |
| Santa Barbara | 31-May-20 | <a href="https://countyofsb.org/uploadedFiles/phd/PROGRAMS/Disease_Control/Corona/HOO%202020%204-3.pdf">https://countyofsb.org/uploadedFiles/phd/PROGRAMS/Disease_Control/Corona/HOO%202020%204-3.pdf</a>                                                                                                                                                                                         |
| Santa Barbara | 31-May-20 | <a href="https://countyofsb.org/uploadedFiles/phd/PROGRAMS/Disease_Control/Corona/HOO%202020%206-2.pdf">https://countyofsb.org/uploadedFiles/phd/PROGRAMS/Disease_Control/Corona/HOO%202020%206-2.pdf</a>                                                                                                                                                                                         |
| Santa Barbara | 31-May-20 | <a href="https://countyofsb.org/uploadedFiles/phd/PROGRAMS/Disease_Control/Corona/HOO%202020-11.pdf">https://countyofsb.org/uploadedFiles/phd/PROGRAMS/Disease_Control/Corona/HOO%202020-11.pdf</a>                                                                                                                                                                                               |
| Santa Barbara | 12-Jun-20 | <a href="https://countyofsb.org/uploadedFiles/phd/PROGRAMS/Disease_Control/Corona/HOO%202020-12.pdf">https://countyofsb.org/uploadedFiles/phd/PROGRAMS/Disease_Control/Corona/HOO%202020-12.pdf</a>                                                                                                                                                                                               |
| Santa Barbara | 12-Jun-20 | <a href="https://countyofsb.org/uploadedFiles/phd/PROGRAMS/Disease_Control/Corona/HOO%202020-11-1.pdf">https://countyofsb.org/uploadedFiles/phd/PROGRAMS/Disease_Control/Corona/HOO%202020-11-1.pdf</a>                                                                                                                                                                                           |
| Santa Barbara | 18-Jun-20 | <a href="https://www.cdph.ca.gov/Programs/CID/DCDC/CDPH%20Document%20Library/COVID-19/Guidance-for-Face-Coverings_06-18-2020.pdf">https://www.cdph.ca.gov/Programs/CID/DCDC/CDPH%20Document%20Library/COVID-19/Guidance-for-Face-Coverings_06-18-2020.pdf</a>                                                                                                                                     |
| Santa Barbara | 26-Jun-20 | <a href="https://countyofsb.org/uploadedFiles/phd/PROGRAMS/Disease_Control/Corona/HOO%202020-12-1.pdf">https://countyofsb.org/uploadedFiles/phd/PROGRAMS/Disease_Control/Corona/HOO%202020-12-1.pdf</a>                                                                                                                                                                                           |
| Santa Barbara | 29-Jun-20 | <a href="https://www.noozhawk.com/article/santa_barbara_county_orders_bars_closed_reports_96_new_covid_19_cases">https://www.noozhawk.com/article/santa_barbara_county_orders_bars_closed_reports_96_new_covid_19_cases</a>                                                                                                                                                                       |
| Santa Barbara | 2-Jul-20  | <a href="https://countyofsb.org/uploadedFiles/phd/PROGRAMS/Disease_Control/Corona/HOO%202020-12-3.pdf">https://countyofsb.org/uploadedFiles/phd/PROGRAMS/Disease_Control/Corona/HOO%202020-12-3.pdf</a>                                                                                                                                                                                           |
| Santa Barbara | 2-Jul-20  | <a href="https://countyofsb.org/uploadedFiles/phd/PROGRAMS/Disease_Control/Corona/HOO%202020-13%20Beach%20Closure.pdf">https://countyofsb.org/uploadedFiles/phd/PROGRAMS/Disease_Control/Corona/HOO%202020-13%20Beach%20Closure.pdf</a>                                                                                                                                                           |
| Santa Barbara | 6-Jul-20  | <a href="https://countyofsb.org/uploadedFiles/phd/PROGRAMS/Disease_Control/Corona/HOO%202002-12-4.pdf">https://countyofsb.org/uploadedFiles/phd/PROGRAMS/Disease_Control/Corona/HOO%202002-12-4.pdf</a>                                                                                                                                                                                           |
| Santa Barbara | 13-Jul-20 | <a href="https://www.latimes.com/california/story/2020-07-13/newsom-california-county-rollback-reopening-coronavirus">https://www.latimes.com/california/story/2020-07-13/newsom-california-county-rollback-reopening-coronavirus</a>                                                                                                                                                             |
| Santa Barbara | 14-Jul-20 | <a href="https://countyofsb.org/uploadedFiles/phd/PROGRAMS/Disease_Control/Corona/HOO%202020-12-5.pdf">https://countyofsb.org/uploadedFiles/phd/PROGRAMS/Disease_Control/Corona/HOO%202020-12-5.pdf</a>                                                                                                                                                                                           |
| Santa Barbara | 17-Jul-20 | <a href="https://www.cdph.ca.gov/Programs/CID/DCDC/CDPH%20Document%20Library/COVID-19/Schools%20Reopening%20Recommendations.pdf">https://www.cdph.ca.gov/Programs/CID/DCDC/CDPH%20Document%20Library/COVID-19/Schools%20Reopening%20Recommendations.pdf</a>                                                                                                                                       |
| Santa Barbara | 23-Jul-20 | <a href="https://countyofsb.org/uploadedFiles/phd/PROGRAMS/Disease_Control/Corona/HOO%202020-10-1.pdf">https://countyofsb.org/uploadedFiles/phd/PROGRAMS/Disease_Control/Corona/HOO%202020-10-1.pdf</a>                                                                                                                                                                                           |

|               |           |                                                                                                                                                                                                                                                                                                                                                                                                                                                                                                                                                                                       |
|---------------|-----------|---------------------------------------------------------------------------------------------------------------------------------------------------------------------------------------------------------------------------------------------------------------------------------------------------------------------------------------------------------------------------------------------------------------------------------------------------------------------------------------------------------------------------------------------------------------------------------------|
| Santa Barbara | 30-Jul-20 | <a href="https://countyofsb.org/uploadedFiles/phd/PROGRAMS/Disease_Control/Corona/HOO%202020-11-2.pdf">https://countyofsb.org/uploadedFiles/phd/PROGRAMS/Disease_Control/Corona/HOO%202020-11-2.pdf</a>                                                                                                                                                                                                                                                                                                                                                                               |
| Santa Barbara | 31-Jul-20 | <a href="https://countyofsb.org/uploadedFiles/phd/PROGRAMS/Disease_Control/Corona/HOO%202020-4-4.pdf">https://countyofsb.org/uploadedFiles/phd/PROGRAMS/Disease_Control/Corona/HOO%202020-4-4.pdf</a>                                                                                                                                                                                                                                                                                                                                                                                 |
| Santa Barbara | 31-Jul-20 | <a href="https://countyofsb.org/uploadedFiles/phd/PROGRAMS/Disease_Control/Corona/HOO%202020-6-3.pdf">https://countyofsb.org/uploadedFiles/phd/PROGRAMS/Disease_Control/Corona/HOO%202020-6-3.pdf</a>                                                                                                                                                                                                                                                                                                                                                                                 |
| Santa Barbara | 12-Aug-20 | <a href="https://countyofsb.org/uploadedFiles/phd/PROGRAMS/Disease_Control/Corona/HOO%202020-12-6.pdf">https://countyofsb.org/uploadedFiles/phd/PROGRAMS/Disease_Control/Corona/HOO%202020-12-6.pdf</a>                                                                                                                                                                                                                                                                                                                                                                               |
| Santa Barbara | 20-Aug-20 | <a href="https://countyofsb.org/uploadedFiles/phd/PROGRAMS/Disease_Control/Corona/HOO%202020-10-2.pdf">https://countyofsb.org/uploadedFiles/phd/PROGRAMS/Disease_Control/Corona/HOO%202020-10-2.pdf</a>                                                                                                                                                                                                                                                                                                                                                                               |
| Santa Barbara | 28-Aug-20 | <a href="https://countyofsb.org/uploadedFiles/phd/PROGRAMS/Disease_Control/Corona/HOO%202020-11-3.pdf">https://countyofsb.org/uploadedFiles/phd/PROGRAMS/Disease_Control/Corona/HOO%202020-11-3.pdf</a>                                                                                                                                                                                                                                                                                                                                                                               |
| Santa Barbara | 28-Aug-20 | <a href="https://abc7news.com/ca-reopneing-phases-covid19cagov-gavin-newsom-update-california-salon-reopening/6393805/">https://abc7news.com/ca-reopneing-phases-covid19cagov-gavin-newsom-update-california-salon-reopening/6393805/</a>                                                                                                                                                                                                                                                                                                                                             |
| Santa Barbara | 14-Sep-20 | <a href="https://countyofsb.org/uploadedFiles/phd/PROGRAMS/Disease_Control/Corona/HOO%202020%2014-1.pdf">https://countyofsb.org/uploadedFiles/phd/PROGRAMS/Disease_Control/Corona/HOO%202020%2014-1.pdf</a>                                                                                                                                                                                                                                                                                                                                                                           |
| Santa Barbara | 18-Sep-20 | <a href="https://countyofsb.org/uploadedFiles/phd/PROGRAMS/Disease_Control/Corona/HOO%202020-10-3.pdf">https://countyofsb.org/uploadedFiles/phd/PROGRAMS/Disease_Control/Corona/HOO%202020-10-3.pdf</a>                                                                                                                                                                                                                                                                                                                                                                               |
| Santa Barbara | 22-Sep-20 | <a href="https://files.covid19.ca.gov/pdf/guidance-expanded-personal-care-services--en.pdf">https://files.covid19.ca.gov/pdf/guidance-expanded-personal-care-services--en.pdf</a>                                                                                                                                                                                                                                                                                                                                                                                                     |
| Santa Barbara | 23-Sep-20 | <a href="https://countyofsb.org/uploadedFiles/phd/PROGRAMS/Disease_Control/Corona/HOO%202020-12-8.pdf">https://countyofsb.org/uploadedFiles/phd/PROGRAMS/Disease_Control/Corona/HOO%202020-12-8.pdf</a>                                                                                                                                                                                                                                                                                                                                                                               |
| Santa Barbara | 27-Sep-20 | <a href="https://countyofsb.org/uploadedFiles/phd/PROGRAMS/Disease_Control/Corona/HOO%202020%204-7.pdf">https://countyofsb.org/uploadedFiles/phd/PROGRAMS/Disease_Control/Corona/HOO%202020%204-7.pdf</a>                                                                                                                                                                                                                                                                                                                                                                             |
| Santa Barbara | 29-Sep-20 | <a href="https://countyofsb.org/uploadedFiles/phd/PROGRAMS/Disease_Control/Corona/HOO%202020%206-6.pdf">https://countyofsb.org/uploadedFiles/phd/PROGRAMS/Disease_Control/Corona/HOO%202020%206-6.pdf</a>                                                                                                                                                                                                                                                                                                                                                                             |
| Santa Barbara | 30-Sep-20 | <a href="https://countyofsb.org/uploadedFiles/phd/PROGRAMS/Disease_Control/Corona/HOO%202020%2012-9.pdf">https://countyofsb.org/uploadedFiles/phd/PROGRAMS/Disease_Control/Corona/HOO%202020%2012-9.pdf</a>                                                                                                                                                                                                                                                                                                                                                                           |
| Santa Barbara | 9-Oct-20  | <a href="https://wp.sbcounty.gov/cao/countywire/?p=9160#:~:text=Private%20outdoor%20gatherings%20of%20three%20households%20now%20allowed%20throughout%20the%20county%2C%20state,-Published%20October%209&amp;text=Private%20outdoor%20gatherings%20of%20people,Gavin%20Newsom%20on%20Friday.">https://wp.sbcounty.gov/cao/countywire/?p=9160#:~:text=Private%20outdoor%20gatherings%20of%20three%20households%20now%20allowed%20throughout%20the%20county%2C%20state,-Published%20October%209&amp;text=Private%20outdoor%20gatherings%20of%20people,Gavin%20Newsom%20on%20Friday.</a> |
| Santa Barbara | 13-Oct-20 | <a href="https://countyofsb.org/uploadedFiles/phd/PROGRAMS/Disease_Control/Corona/HOO%2014-2.pdf">https://countyofsb.org/uploadedFiles/phd/PROGRAMS/Disease_Control/Corona/HOO%2014-2.pdf</a>                                                                                                                                                                                                                                                                                                                                                                                         |
| Santa Barbara | 16-Oct-20 | <a href="https://publichealthsb.org/wp-content/uploads/2020/10/Health-Officer-Order-2020-12.12-Phased-Reopening-Within-Santa-Barbara-County.pdf">https://publichealthsb.org/wp-content/uploads/2020/10/Health-Officer-Order-2020-12.12-Phased-Reopening-Within-Santa-Barbara-County.pdf</a>                                                                                                                                                                                                                                                                                           |
| Santa Barbara | 17-Oct-20 | <a href="https://countyofsb.org/uploadedFiles/phd/PROGRAMS/Disease_Control/Corona/HOO%202020%2010-4.pdf">https://countyofsb.org/uploadedFiles/phd/PROGRAMS/Disease_Control/Corona/HOO%202020%2010-4.pdf</a>                                                                                                                                                                                                                                                                                                                                                                           |
| Santa Barbara | 24-Oct-20 | <a href="https://publichealthsb.org/wp-content/uploads/2020/10/HOO-2020-10-22-and-Attachments-.pdf">https://publichealthsb.org/wp-content/uploads/2020/10/HOO-2020-10-22-and-Attachments-.pdf</a>                                                                                                                                                                                                                                                                                                                                                                                     |
| Santa Barbara | 26-Oct-20 | <a href="https://publichealthsb.org/wp-content/uploads/2020/10/HO-Order-2020-4.8-Requirements-for-all-individuals-entering-critical-infrastructure-facilities.pdf">https://publichealthsb.org/wp-content/uploads/2020/10/HO-Order-2020-4.8-Requirements-for-all-individuals-entering-critical-infrastructure-facilities.pdf</a>                                                                                                                                                                                                                                                       |
| Santa Barbara | 28-Oct-20 | <a href="https://publichealthsb.org/wp-content/uploads/2020/10/HO-Order-2020-6.7-Requirements-for-all-individuals-entering-certain-licensed-facilities.pdf">https://publichealthsb.org/wp-content/uploads/2020/10/HO-Order-2020-6.7-Requirements-for-all-individuals-entering-certain-licensed-facilities.pdf</a>                                                                                                                                                                                                                                                                     |
| Santa Barbara | 4-Nov-20  | <a href="https://publichealthsb.org/wp-content/uploads/2020/11/Health-Officer-Order-No.-2020-11.6-Hospitals-Licensed-Residential-Facility-Visitor-Restrictions-for-the-Control-of-COVID-19.pdf">https://publichealthsb.org/wp-content/uploads/2020/11/Health-Officer-Order-No.-2020-11.6-Hospitals-Licensed-Residential-Facility-Visitor-Restrictions-for-the-Control-of-COVID-19.pdf</a>                                                                                                                                                                                             |
| Santa Barbara | 11-Nov-20 | <a href="https://publichealthsb.org/wp-content/uploads/2020/11/Health-Officer-Order-No.-2020-14.3-Signed.pdf">https://publichealthsb.org/wp-content/uploads/2020/11/Health-Officer-Order-No.-2020-14.3-Signed.pdf</a>                                                                                                                                                                                                                                                                                                                                                                 |
| Santa Barbara | 17-Nov-20 | <a href="https://countyofsb.org/uploadedFiles/phd/PROGRAMS/Disease_Control/Corona/HOO%202020-12-14.pdf">https://countyofsb.org/uploadedFiles/phd/PROGRAMS/Disease_Control/Corona/HOO%202020-12-14.pdf</a>                                                                                                                                                                                                                                                                                                                                                                             |
| Santa Barbara | 17-Nov-20 | <a href="https://kmph.com/news/local/40-california-counties-in-purple-tier-including-the-central-valley">https://kmph.com/news/local/40-california-counties-in-purple-tier-including-the-central-valley</a>                                                                                                                                                                                                                                                                                                                                                                           |
| Santa Barbara | 24-Nov-20 | <a href="https://countyofsb.org/uploadedFiles/phd/PROGRAMS/Disease_Control/Corona/HOO%202020-4-9.pdf">https://countyofsb.org/uploadedFiles/phd/PROGRAMS/Disease_Control/Corona/HOO%202020-4-9.pdf</a>                                                                                                                                                                                                                                                                                                                                                                                 |

|               |           |                                                                                                                                                                                                                                                           |
|---------------|-----------|-----------------------------------------------------------------------------------------------------------------------------------------------------------------------------------------------------------------------------------------------------------|
| Santa Barbara | 25-Nov-20 | <a href="https://countyofsb.org/uploadedFiles/phd/PROGRAMS/Disease_Control/Corona/HOO%202020-10-6.pdf">https://countyofsb.org/uploadedFiles/phd/PROGRAMS/Disease_Control/Corona/HOO%202020-10-6.pdf</a>                                                   |
| Santa Barbara | 26-Nov-20 | <a href="https://countyofsb.org/uploadedFiles/phd/PROGRAMS/Disease_Control/Corona/HOO%202020-6-8.pdf">https://countyofsb.org/uploadedFiles/phd/PROGRAMS/Disease_Control/Corona/HOO%202020-6-8.pdf</a>                                                     |
| Santa Barbara | 5-Dec-20  | <a href="https://www.gov.ca.gov/wp-content/uploads/2020/12/12.3.20-Stay-at-Home-Order-ICU-Scenario.pdf">https://www.gov.ca.gov/wp-content/uploads/2020/12/12.3.20-Stay-at-Home-Order-ICU-Scenario.pdf</a>                                                 |
| Santa Barbara | 10-Dec-20 | <a href="https://publichealthsb.org/wp-content/uploads/2020/12/Health-Officer-Order-No.-2020-14.4-Signed.pdf">https://publichealthsb.org/wp-content/uploads/2020/12/Health-Officer-Order-No.-2020-14.4-Signed.pdf</a>                                     |
| Santa Barbara | 23-Dec-20 | <a href="https://publichealthsb.org/wp-content/uploads/2020/12/Health-Officer-Order-No.-2020-4.10-Signed.pdf">https://publichealthsb.org/wp-content/uploads/2020/12/Health-Officer-Order-No.-2020-4.10-Signed.pdf</a>                                     |
| Santa Barbara | 23-Dec-20 | <a href="https://countyofsb.org/uploadedFiles/phd/PROGRAMS/Disease_Control/Corona/HOO%202020-12-17.pdf">https://countyofsb.org/uploadedFiles/phd/PROGRAMS/Disease_Control/Corona/HOO%202020-12-17.pdf</a>                                                 |
| Santa Barbara | 24-Dec-20 | <a href="https://publichealthsb.org/wp-content/uploads/2020/12/Health-Officer-Order-No.-2020-10.7-Signed.pdf">https://publichealthsb.org/wp-content/uploads/2020/12/Health-Officer-Order-No.-2020-10.7-Signed.pdf</a>                                     |
| Santa Barbara | 25-Dec-20 | <a href="https://publichealthsb.org/wp-content/uploads/2020/12/Health-Officer-Order-No.-2020-6.9-Signed.pdf">https://publichealthsb.org/wp-content/uploads/2020/12/Health-Officer-Order-No.-2020-6.9-Signed.pdf</a>                                       |
| Santa Clara   | 3-Feb-20  | <a href="https://www.kron4.com/health/coronavirus/coronavirus-outbreak-santa-clara-county-to-declare-local-health-emergency/">https://www.kron4.com/health/coronavirus/coronavirus-outbreak-santa-clara-county-to-declare-local-health-emergency/</a>     |
| Santa Clara   | 10-Feb-20 | <a href="https://www.kron4.com/health/coronavirus/coronavirus-outbreak-santa-clara-county-to-declare-local-health-emergency/">https://www.kron4.com/health/coronavirus/coronavirus-outbreak-santa-clara-county-to-declare-local-health-emergency/</a>     |
| Santa Clara   | 9-Mar-20  | <a href="https://www.sccgov.org/sites/covid19/Documents/03-09-20-Health-Officer-Order.pdf">https://www.sccgov.org/sites/covid19/Documents/03-09-20-Health-Officer-Order.pdf</a>                                                                           |
| Santa Clara   | 13-Mar-20 | <a href="https://www.nbcbayarea.com/news/local/santa-clara-county-to-announce-new-coronavirus-orders/2253905/">https://www.nbcbayarea.com/news/local/santa-clara-county-to-announce-new-coronavirus-orders/2253905/</a>                                   |
| Santa Clara   | 13-Mar-20 | <a href="https://www.sccgov.org/sites/covid19/Documents/03-13-20-Health-Officer-Order.pdf">https://www.sccgov.org/sites/covid19/Documents/03-13-20-Health-Officer-Order.pdf</a>                                                                           |
| Santa Clara   | 16-Mar-20 | <a href="https://www.sccgov.org/sites/covid19/Documents/03-16-20-Health-Officer-Order-to-Shelter-in-Place.pdf">https://www.sccgov.org/sites/covid19/Documents/03-16-20-Health-Officer-Order-to-Shelter-in-Place.pdf</a>                                   |
| Santa Clara   | 19-Mar-20 | <a href="https://www.gov.ca.gov/wp-content/uploads/2020/03/3.19.20-attested-EO-N-33-20-COVID-19-HEALTH-ORDER.pdf">https://www.gov.ca.gov/wp-content/uploads/2020/03/3.19.20-attested-EO-N-33-20-COVID-19-HEALTH-ORDER.pdf</a>                             |
| Santa Clara   | 24-Mar-20 | <a href="https://www.sccgov.org/sites/covid19/Documents/03-24-20-Health-Officer-Order-Covid19-Testing.pdf">https://www.sccgov.org/sites/covid19/Documents/03-24-20-Health-Officer-Order-Covid19-Testing.pdf</a>                                           |
| Santa Clara   | 25-Mar-20 | <a href="https://patch.com/california/walnutcreek/contra-costa-county-school-closure-extended-through-may-1">https://patch.com/california/walnutcreek/contra-costa-county-school-closure-extended-through-may-1</a>                                       |
| Santa Clara   | 31-Mar-20 | <a href="https://www.sccgov.org/sites/covid19/Documents/03-31-20-Health-Officer-Order-to-Shelter-in-Place.pdf">https://www.sccgov.org/sites/covid19/Documents/03-31-20-Health-Officer-Order-to-Shelter-in-Place.pdf</a>                                   |
| Santa Clara   | 2-Apr-20  | <a href="https://www.sccgov.org/sites/phd/news/Pages/non-medical-face-coverings.aspx">https://www.sccgov.org/sites/phd/news/Pages/non-medical-face-coverings.aspx</a>                                                                                     |
| Santa Clara   | 6-Apr-20  | <a href="https://www.sccgov.org/sites/covid19/Documents/04-06-20-order-disclose-inventories-ppe-ventilators.pdf">https://www.sccgov.org/sites/covid19/Documents/04-06-20-order-disclose-inventories-ppe-ventilators.pdf</a>                               |
| Santa Clara   | 17-Apr-20 | <a href="https://www.sccgov.org/sites/covid19/Pages/press-release-04-17-2020-guidance-face-coverings.aspx">https://www.sccgov.org/sites/covid19/Pages/press-release-04-17-2020-guidance-face-coverings.aspx</a>                                           |
| Santa Clara   | 29-Apr-20 | <a href="https://www.sccgov.org/sites/covid19/Documents/05-04-20-Health-Officer-Order.pdf">https://www.sccgov.org/sites/covid19/Documents/05-04-20-Health-Officer-Order.pdf</a>                                                                           |
| Santa Clara   | 13-May-20 | <a href="https://www.sccgov.org/sites/covid19/Documents/05-13-20-Health-Officer-Order-disclose-inventories-ppe-ventilators.pdf">https://www.sccgov.org/sites/covid19/Documents/05-13-20-Health-Officer-Order-disclose-inventories-ppe-ventilators.pdf</a> |
| Santa Clara   | 18-May-20 | <a href="https://www.sccgov.org/sites/covid19/Documents/05-18-20-Health-Officer-Order.pdf">https://www.sccgov.org/sites/covid19/Documents/05-18-20-Health-Officer-Order.pdf</a>                                                                           |
| Santa Clara   | 5-Jun-20  | <a href="https://www.sccgov.org/sites/covid19/Documents/executive-summary-order-06-05-2020.pdf">https://www.sccgov.org/sites/covid19/Documents/executive-summary-order-06-05-2020.pdf</a>                                                                 |
| Santa Clara   | 10-Jun-20 | <a href="https://www.sccgov.org/sites/covid19/Documents/06-15-20-Health-Officer-Order.pdf">https://www.sccgov.org/sites/covid19/Documents/06-15-20-Health-Officer-Order.pdf</a>                                                                           |

|             |           |                                                                                                                                                                                                                                                                                                                                                                                                                                                                                                                                                                                       |
|-------------|-----------|---------------------------------------------------------------------------------------------------------------------------------------------------------------------------------------------------------------------------------------------------------------------------------------------------------------------------------------------------------------------------------------------------------------------------------------------------------------------------------------------------------------------------------------------------------------------------------------|
| Santa Clara | 18-Jun-20 | <a href="https://www.cdph.ca.gov/Programs/CID/DCDC/CDPH%20Document%20Library/COVID-19/Guidance-for-Face-Coverings_06-18-2020.pdf">https://www.cdph.ca.gov/Programs/CID/DCDC/CDPH%20Document%20Library/COVID-19/Guidance-for-Face-Coverings_06-18-2020.pdf</a>                                                                                                                                                                                                                                                                                                                         |
| Santa Clara | 1-Jul-20  | <a href="https://www.cdph.ca.gov/Programs/OPA/Pages/NR20-143.aspx">https://www.cdph.ca.gov/Programs/OPA/Pages/NR20-143.aspx</a>                                                                                                                                                                                                                                                                                                                                                                                                                                                       |
| Santa Clara | 2-Jul-20  | <a href="https://www.sccgov.org/sites/covid19/Documents/07-02-20-Health-Officer-Order.pdf">https://www.sccgov.org/sites/covid19/Documents/07-02-20-Health-Officer-Order.pdf</a>                                                                                                                                                                                                                                                                                                                                                                                                       |
| Santa Clara | 11-Jul-20 | <a href="https://www.mercurynews.com/2020/07/11/heres-what-can-reopen-in-santa-clara-county-starting-monday/">https://www.mercurynews.com/2020/07/11/heres-what-can-reopen-in-santa-clara-county-starting-monday/</a>                                                                                                                                                                                                                                                                                                                                                                 |
| Santa Clara | 13-Jul-20 | <a href="https://www.latimes.com/california/story/2020-07-13/newsom-california-county-rollback-reopening-coronavirus">https://www.latimes.com/california/story/2020-07-13/newsom-california-county-rollback-reopening-coronavirus</a>                                                                                                                                                                                                                                                                                                                                                 |
| Santa Clara | 13-Jul-20 | <a href="https://www.sccgov.org/sites/covid19/Pages/press-statement-07-13-2020-state-order.aspx">https://www.sccgov.org/sites/covid19/Pages/press-statement-07-13-2020-state-order.aspx</a>                                                                                                                                                                                                                                                                                                                                                                                           |
| Santa Clara | 13-Jul-20 | <a href="https://www.sccgov.org/sites/covid19/Pages/press-statement-07-13-2020-state-order.aspx">https://www.sccgov.org/sites/covid19/Pages/press-statement-07-13-2020-state-order.aspx</a>                                                                                                                                                                                                                                                                                                                                                                                           |
| Santa Clara | 17-Jul-20 | <a href="https://www.sccgov.org/sites/covid19/Pages/mandatory-directives-schools.aspx">https://www.sccgov.org/sites/covid19/Pages/mandatory-directives-schools.aspx</a>                                                                                                                                                                                                                                                                                                                                                                                                               |
| Santa Clara | 12-Aug-20 | <a href="https://www.paloaltoonline.com/news/2020/08/12/santa-clara-county-imposes-fines-on-public-health-violators-as-covid-19-cases-surge">https://www.paloaltoonline.com/news/2020/08/12/santa-clara-county-imposes-fines-on-public-health-violators-as-covid-19-cases-surge</a>                                                                                                                                                                                                                                                                                                   |
| Santa Clara | 28-Aug-20 | <a href="https://abc7news.com/ca-reopneing-phases-covid19cagov-gavin-newsom-update-california-salon-reopening/6393805/">https://abc7news.com/ca-reopneing-phases-covid19cagov-gavin-newsom-update-california-salon-reopening/6393805/</a>                                                                                                                                                                                                                                                                                                                                             |
| Santa Clara | 8-Sep-20  | <a href="https://www.sccgov.org/sites/covid19/Documents/whats-open-under-state-local-health-orders.pdf">https://www.sccgov.org/sites/covid19/Documents/whats-open-under-state-local-health-orders.pdf</a>                                                                                                                                                                                                                                                                                                                                                                             |
| Santa Clara | 5-Oct-20  | <a href="https://www.sccgov.org/sites/covid19/Pages/order-health-officer-10-05-20.aspx">https://www.sccgov.org/sites/covid19/Pages/order-health-officer-10-05-20.aspx</a>                                                                                                                                                                                                                                                                                                                                                                                                             |
| Santa Clara | 9-Oct-20  | <a href="https://wp.sbcounty.gov/cao/countywire/?p=9160#:~:text=Private%20outdoor%20gatherings%20of%20three%20households%20now%20allowed%20throughout%20the%20county%2C%20state,-Published%20October%209&amp;text=Private%20outdoor%20gatherings%20of%20people,Gavin%20Newsom%20on%20Friday.">https://wp.sbcounty.gov/cao/countywire/?p=9160#:~:text=Private%20outdoor%20gatherings%20of%20three%20households%20now%20allowed%20throughout%20the%20county%2C%20state,-Published%20October%209&amp;text=Private%20outdoor%20gatherings%20of%20people,Gavin%20Newsom%20on%20Friday.</a> |
| Santa Clara | 13-Nov-20 | <a href="https://www.cdph.ca.gov/Programs/CID/DCDC/Pages/COVID-19/Guidance-for-the-Prevention-of-COVID-19-Transmission-for-Gatherings-November-2020.aspx">https://www.cdph.ca.gov/Programs/CID/DCDC/Pages/COVID-19/Guidance-for-the-Prevention-of-COVID-19-Transmission-for-Gatherings-November-2020.aspx</a>                                                                                                                                                                                                                                                                         |
| Santa Clara | 17-Nov-20 | <a href="https://kmpb.com/news/local/40-california-counties-in-purple-tier-including-the-central-valley">https://kmpb.com/news/local/40-california-counties-in-purple-tier-including-the-central-valley</a>                                                                                                                                                                                                                                                                                                                                                                           |
| Santa Clara | 19-Nov-20 | <a href="https://www.cdph.ca.gov/Programs/CID/DCDC/Pages/COVID-19/limited-stay-at-home-order.aspx">https://www.cdph.ca.gov/Programs/CID/DCDC/Pages/COVID-19/limited-stay-at-home-order.aspx</a>                                                                                                                                                                                                                                                                                                                                                                                       |
| Santa Clara | 28-Nov-20 | <a href="https://www.sccgov.org/sites/covid19/Pages/public-health-orders.aspx#executive-summary">https://www.sccgov.org/sites/covid19/Pages/public-health-orders.aspx#executive-summary</a>                                                                                                                                                                                                                                                                                                                                                                                           |
| Santa Clara | 4-Dec-20  | <a href="https://www.nbcbayarea.com/news/coronavirus/when-will-new-coronavirus-stay-at-home-order-impact-bay-area/2415063/">https://www.nbcbayarea.com/news/coronavirus/when-will-new-coronavirus-stay-at-home-order-impact-bay-area/2415063/</a>                                                                                                                                                                                                                                                                                                                                     |
| Santa Clara | 16-Dec-20 | <a href="https://www.gov.ca.gov/wp-content/uploads/2020/12/12.3.20-Stay-at-Home-Order-ICU-Scenario.pdf">https://www.gov.ca.gov/wp-content/uploads/2020/12/12.3.20-Stay-at-Home-Order-ICU-Scenario.pdf</a>                                                                                                                                                                                                                                                                                                                                                                             |
| Santa Cruz  | 4-Mar-20  | <a href="https://www.townmedia.com/press_banner/local-health-emergency-declared-for-covid-19--response/article_2aa19ae4-5e51-11ea-bc0e-978f60a7180c.html">https://www.townmedia.com/press_banner/local-health-emergency-declared-for-covid-19--response/article_2aa19ae4-5e51-11ea-bc0e-978f60a7180c.html</a>                                                                                                                                                                                                                                                                         |
| Santa Cruz  | 9-Mar-20  | <a href="https://www.sccgov.org/sites/covid19/Documents/03-09-20-Health-Officer-Order.pdf">https://www.sccgov.org/sites/covid19/Documents/03-09-20-Health-Officer-Order.pdf</a>                                                                                                                                                                                                                                                                                                                                                                                                       |
| Santa Cruz  | 13-Mar-20 | <a href="https://www.sccgov.org/sites/covid19/Documents/03-13-20-Health-Officer-Order.pdf">https://www.sccgov.org/sites/covid19/Documents/03-13-20-Health-Officer-Order.pdf</a>                                                                                                                                                                                                                                                                                                                                                                                                       |
| Santa Cruz  | 16-Mar-20 | <a href="https://www.sccgov.org/sites/covid19/Documents/03-16-20-Health-Officer-Order-to-Shelter-in-Place.pdf">https://www.sccgov.org/sites/covid19/Documents/03-16-20-Health-Officer-Order-to-Shelter-in-Place.pdf</a>                                                                                                                                                                                                                                                                                                                                                               |
| Santa Cruz  | 19-Mar-20 | <a href="https://www.gov.ca.gov/wp-content/uploads/2020/03/3.19.20-attested-EO-N-33-20-COVID-19-HEALTH-ORDER.pdf">https://www.gov.ca.gov/wp-content/uploads/2020/03/3.19.20-attested-EO-N-33-20-COVID-19-HEALTH-ORDER.pdf</a>                                                                                                                                                                                                                                                                                                                                                         |
| Santa Cruz  | 26-Mar-20 | <a href="http://santacruzhealth.org/Portals/7/Pdfs/Coronavirus/20200325%20Order%20-%20Labs.pdf">http://santacruzhealth.org/Portals/7/Pdfs/Coronavirus/20200325%20Order%20-%20Labs.pdf</a>                                                                                                                                                                                                                                                                                                                                                                                             |
| Santa Cruz  | 31-Mar-20 | <a href="https://www.sccgov.org/sites/covid19/Documents/03-31-20-Health-Officer-Order-to-Shelter-in-Place.pdf">https://www.sccgov.org/sites/covid19/Documents/03-31-20-Health-Officer-Order-to-Shelter-in-Place.pdf</a>                                                                                                                                                                                                                                                                                                                                                               |

|            |           |                                                                                                                                                                                                                                                                                                                                                                                                                                                                                                                                                                                     |
|------------|-----------|-------------------------------------------------------------------------------------------------------------------------------------------------------------------------------------------------------------------------------------------------------------------------------------------------------------------------------------------------------------------------------------------------------------------------------------------------------------------------------------------------------------------------------------------------------------------------------------|
| Santa Cruz | 7-Apr-20  | <a href="https://www.santacruzhealth.org/Portals/7/Pdfs/Coronavirus/PHO%20Order%20Temp%20Closure%20of%20Beaches%20and%20Parks%20April%208%202020%20FINAL.pdf">https://www.santacruzhealth.org/Portals/7/Pdfs/Coronavirus/PHO%20Order%20Temp%20Closure%20of%20Beaches%20and%20Parks%20April%208%202020%20FINAL.pdf</a>                                                                                                                                                                                                                                                               |
| Santa Cruz | 23-Apr-20 | <a href="http://www.santacruzhealth.org/Portals/7/Pdfs/Coronavirus/PHO%20Order%20Face%20Coverings%20April%2024.pdf?version=042320">http://www.santacruzhealth.org/Portals/7/Pdfs/Coronavirus/PHO%20Order%20Face%20Coverings%20April%2024.pdf?version=042320</a>                                                                                                                                                                                                                                                                                                                     |
| Santa Cruz | 29-Apr-20 | <a href="https://www.sccgov.org/sites/covid19/Documents/05-04-20-Health-Officer-Order.pdf">https://www.sccgov.org/sites/covid19/Documents/05-04-20-Health-Officer-Order.pdf</a>                                                                                                                                                                                                                                                                                                                                                                                                     |
| Santa Cruz | 6-May-20  | <a href="http://santacruzhealth.org/Portals/7/Pdfs/Coronavirus/Health%20Order%20May6%20signed%20by%20GN%20and%20JH.pdf?ver=20200506">http://santacruzhealth.org/Portals/7/Pdfs/Coronavirus/Health%20Order%20May6%20signed%20by%20GN%20and%20JH.pdf?ver=20200506</a>                                                                                                                                                                                                                                                                                                                 |
| Santa Cruz | 26-May-20 | <a href="https://www.santacruzhealth.org/Portals/7/Pdfs/Coronavirus/May%2026%20PHO%20Order.pdf?ver=20200526">https://www.santacruzhealth.org/Portals/7/Pdfs/Coronavirus/May%2026%20PHO%20Order.pdf?ver=20200526</a>                                                                                                                                                                                                                                                                                                                                                                 |
| Santa Cruz | 30-May-20 | <a href="http://santacruzhealth.org/Portals/7/Pdfs/Coronavirus/Supplemental%20PHO%20Order%20Stage%202%20Variance.pdf?ver=20200530">http://santacruzhealth.org/Portals/7/Pdfs/Coronavirus/Supplemental%20PHO%20Order%20Stage%202%20Variance.pdf?ver=20200530</a>                                                                                                                                                                                                                                                                                                                     |
| Santa Cruz | 9-Jun-20  | <a href="http://santacruzhealth.org/Portals/7/Pdfs/Coronavirus/PHO%20Order%20June%209%202020.pdf?ver=20200609">http://santacruzhealth.org/Portals/7/Pdfs/Coronavirus/PHO%20Order%20June%209%202020.pdf?ver=20200609</a>                                                                                                                                                                                                                                                                                                                                                             |
| Santa Cruz | 10-Jun-20 | <a href="https://www.sccgov.org/sites/covid19/Documents/06-15-20-Health-Officer-Order.pdf">https://www.sccgov.org/sites/covid19/Documents/06-15-20-Health-Officer-Order.pdf</a>                                                                                                                                                                                                                                                                                                                                                                                                     |
| Santa Cruz | 18-Jun-20 | <a href="https://www.cdph.ca.gov/Programs/CID/DCDC/CDPH%20Document%20Library/COVID-19/Guidance-for-Face-Coverings_06-18-2020.pdf">https://www.cdph.ca.gov/Programs/CID/DCDC/CDPH%20Document%20Library/COVID-19/Guidance-for-Face-Coverings_06-18-2020.pdf</a>                                                                                                                                                                                                                                                                                                                       |
| Santa Cruz | 24-Jun-20 | <a href="http://santacruzhealth.org/Portals/7/Pdfs/Coronavirus/June%2024%20PHO%20Face%20Covering%20Order.pdf?ver=20200625">http://santacruzhealth.org/Portals/7/Pdfs/Coronavirus/June%2024%20PHO%20Face%20Covering%20Order.pdf?ver=20200625</a>                                                                                                                                                                                                                                                                                                                                     |
| Santa Cruz | 25-Jun-20 | <a href="https://www.santacruzhealth.org/Portals/7/Pdfs/Coronavirus/PHO%20Order%20June%2024%202020.pdf?ver=20200625">https://www.santacruzhealth.org/Portals/7/Pdfs/Coronavirus/PHO%20Order%20June%2024%202020.pdf?ver=20200625</a>                                                                                                                                                                                                                                                                                                                                                 |
| Santa Cruz | 2-Jul-20  | <a href="https://www.sccgov.org/sites/covid19/Documents/07-02-20-Health-Officer-Order.pdf">https://www.sccgov.org/sites/covid19/Documents/07-02-20-Health-Officer-Order.pdf</a>                                                                                                                                                                                                                                                                                                                                                                                                     |
| Santa Cruz | 13-Jul-20 | <a href="https://www.latimes.com/california/story/2020-07-13/newsom-california-county-rollback-reopening-coronavirus">https://www.latimes.com/california/story/2020-07-13/newsom-california-county-rollback-reopening-coronavirus</a>                                                                                                                                                                                                                                                                                                                                               |
| Santa Cruz | 27-Jul-20 | <a href="https://kion546.com/health/coronavirus/2020/07/27/santa-cruz-county-prepares-for-possibility-of-more-closures/">https://kion546.com/health/coronavirus/2020/07/27/santa-cruz-county-prepares-for-possibility-of-more-closures/</a>                                                                                                                                                                                                                                                                                                                                         |
| Santa Cruz | 28-Jul-20 | <a href="http://santacruzhealth.org/Portals/7/Pdfs/Coronavirus/PHO%20Order%20for%20Quarantine%20FINAL.pdf">http://santacruzhealth.org/Portals/7/Pdfs/Coronavirus/PHO%20Order%20for%20Quarantine%20FINAL.pdf</a>                                                                                                                                                                                                                                                                                                                                                                     |
| Santa Cruz | 28-Jul-20 | <a href="http://santacruzhealth.org/Portals/7/Pdfs/Coronavirus/PHO%20Order%20re%20Isolation%20FINAL.pdf">http://santacruzhealth.org/Portals/7/Pdfs/Coronavirus/PHO%20Order%20re%20Isolation%20FINAL.pdf</a>                                                                                                                                                                                                                                                                                                                                                                         |
| Santa Cruz | 4-Aug-20  | <a href="https://www.santacruzsentinel.com/2020/08/04/covid-19-flouting-masking-rules-health-orders-now-an-infraction-in-santa-cruz-county/">https://www.santacruzsentinel.com/2020/08/04/covid-19-flouting-masking-rules-health-orders-now-an-infraction-in-santa-cruz-county/</a>                                                                                                                                                                                                                                                                                                 |
| Santa Cruz | 28-Aug-20 | <a href="https://abc7news.com/ca-reopneing-phases-covid19cagov-gavin-newsom-update-california-salon-reopening/6393805/">https://abc7news.com/ca-reopneing-phases-covid19cagov-gavin-newsom-update-california-salon-reopening/6393805/</a>                                                                                                                                                                                                                                                                                                                                           |
| Santa Cruz | 5-Sep-20  | <a href="https://www.santacruzhealth.org/Portals/7/Pdfs/Coronavirus/LaborDay.08182020-v2.pdf">https://www.santacruzhealth.org/Portals/7/Pdfs/Coronavirus/LaborDay.08182020-v2.pdf</a>                                                                                                                                                                                                                                                                                                                                                                                               |
| Santa Cruz | 8-Sep-20  | <a href="https://projects.sfchronicle.com/2020/coronavirus-map/california-reopening/">https://projects.sfchronicle.com/2020/coronavirus-map/california-reopening/</a>                                                                                                                                                                                                                                                                                                                                                                                                               |
| Santa Cruz | 14-Sep-20 | <a href="http://santacruzhealth.org/Portals/7/Pdfs/Coronavirus/SCC%20PHO%20Order%20Re%20Visitors%20in%20Res%20Healthcare%20Facilities-English_091420.pdf?ver=20200914">http://santacruzhealth.org/Portals/7/Pdfs/Coronavirus/SCC%20PHO%20Order%20Re%20Visitors%20in%20Res%20Healthcare%20Facilities-English_091420.pdf?ver=20200914</a>                                                                                                                                                                                                                                             |
| Santa Cruz | 9-Oct-20  | <a href="https://wp.sbcounty.gov/cao/countywire/?p=9160#:~:text=Private%20outdoor%20gatherings%20of%20three%20households%20now%20allowed%20throughout%20the%20county%2C%20state,Published%20October%209&amp;text=Private%20outdoor%20gatherings%20of%20people,Gavin%20Newsom%20on%20Friday.">https://wp.sbcounty.gov/cao/countywire/?p=9160#:~:text=Private%20outdoor%20gatherings%20of%20three%20households%20now%20allowed%20throughout%20the%20county%2C%20state,Published%20October%209&amp;text=Private%20outdoor%20gatherings%20of%20people,Gavin%20Newsom%20on%20Friday.</a> |
| Santa Cruz | 27-Oct-20 | <a href="https://projects.sfchronicle.com/2020/coronavirus-map/california-reopening/">https://projects.sfchronicle.com/2020/coronavirus-map/california-reopening/</a>                                                                                                                                                                                                                                                                                                                                                                                                               |
| Santa Cruz | 10-Nov-20 | <a href="https://www.latimes.com/california/story/2020-11-10/california-coronavirus-cases-climb-more-counties-expected-strict-reopenings">https://www.latimes.com/california/story/2020-11-10/california-coronavirus-cases-climb-more-counties-expected-strict-reopenings</a>                                                                                                                                                                                                                                                                                                       |
| Santa Cruz | 13-Nov-20 | <a href="https://www.cdph.ca.gov/Programs/CID/DCDC/Pages/COVID-19/Guidance-for-the-Prevention-of-COVID-19-Transmission-for-Gatherings-November-2020.aspx">https://www.cdph.ca.gov/Programs/CID/DCDC/Pages/COVID-19/Guidance-for-the-Prevention-of-COVID-19-Transmission-for-Gatherings-November-2020.aspx</a>                                                                                                                                                                                                                                                                       |
| Santa Cruz | 17-Nov-20 | <a href="https://kmp.com/news/local/40-california-counties-in-purple-tier-including-the-central-valley">https://kmp.com/news/local/40-california-counties-in-purple-tier-including-the-central-valley</a>                                                                                                                                                                                                                                                                                                                                                                           |



|            |           |                                                                                                                                                                                                                                                                                                                                                                                                                                                                                                                                                                                       |
|------------|-----------|---------------------------------------------------------------------------------------------------------------------------------------------------------------------------------------------------------------------------------------------------------------------------------------------------------------------------------------------------------------------------------------------------------------------------------------------------------------------------------------------------------------------------------------------------------------------------------------|
| Santa Cruz | 19-Nov-20 | <a href="https://www.cdph.ca.gov/Programs/CID/DCDC/Pages/COVID-19/limited-stay-at-home-order.aspx">https://www.cdph.ca.gov/Programs/CID/DCDC/Pages/COVID-19/limited-stay-at-home-order.aspx</a>                                                                                                                                                                                                                                                                                                                                                                                       |
| Santa Cruz | 16-Dec-20 | <a href="https://www.gov.ca.gov/wp-content/uploads/2020/12/12.3.20-Stay-at-Home-Order-ICU-Scenario.pdf">https://www.gov.ca.gov/wp-content/uploads/2020/12/12.3.20-Stay-at-Home-Order-ICU-Scenario.pdf</a>                                                                                                                                                                                                                                                                                                                                                                             |
| Shasta     | 17-Mar-20 | <a href="https://www.redding.com/story/news/2020/03/17/coronavirus-shasta-county-redding-anderson-shasta-lake/5074496002/">https://www.redding.com/story/news/2020/03/17/coronavirus-shasta-county-redding-anderson-shasta-lake/5074496002/</a>                                                                                                                                                                                                                                                                                                                                       |
| Shasta     | 19-Mar-20 | <a href="https://www.gov.ca.gov/wp-content/uploads/2020/03/3.19.20-attested-EO-N-33-20-COVID-19-HEALTH-ORDER.pdf">https://www.gov.ca.gov/wp-content/uploads/2020/03/3.19.20-attested-EO-N-33-20-COVID-19-HEALTH-ORDER.pdf</a>                                                                                                                                                                                                                                                                                                                                                         |
| Shasta     | 6-Apr-20  | <a href="https://www.co.shasta.ca.us/docs/libraries/hhsa-docs/covid-19/health-officer-order-suspending-advisory-board-meetings.pdf?sfvrsn=7974f389_0">https://www.co.shasta.ca.us/docs/libraries/hhsa-docs/covid-19/health-officer-order-suspending-advisory-board-meetings.pdf?sfvrsn=7974f389_0</a>                                                                                                                                                                                                                                                                                 |
| Shasta     | 20-Apr-20 | <a href="https://www.co.shasta.ca.us/docs/libraries/hhsa-docs/covid-19/health-officer-advisory-group-(phab).pdf?sfvrsn=9de9f389_2">https://www.co.shasta.ca.us/docs/libraries/hhsa-docs/covid-19/health-officer-advisory-group-(phab).pdf?sfvrsn=9de9f389_2</a>                                                                                                                                                                                                                                                                                                                       |
| Shasta     | 28-Apr-20 | <a href="https://www.co.shasta.ca.us/docs/libraries/hhsa-docs/covid-19/health-officer-advisory-group-(phab).pdf?sfvrsn=9de9f389_2">https://www.co.shasta.ca.us/docs/libraries/hhsa-docs/covid-19/health-officer-advisory-group-(phab).pdf?sfvrsn=9de9f389_2</a>                                                                                                                                                                                                                                                                                                                       |
| Shasta     | 6-May-20  | <a href="https://www.co.shasta.ca.us/index/hhsa/hhsa-newsroom/hhsa-newsroom-posts/wait-in-your-car-for-appointments.-curbside-pickup-at-stores.-shasta-prepares-to-reopen.-05-06-2020">https://www.co.shasta.ca.us/index/hhsa/hhsa-newsroom/hhsa-newsroom-posts/wait-in-your-car-for-appointments.-curbside-pickup-at-stores.-shasta-prepares-to-reopen.-05-06-2020</a>                                                                                                                                                                                                               |
| Shasta     | 10-May-20 | <a href="https://krctv.com/news/coronavirus/shasta-county-is-starting-to-reopen-here-is-what-businesses-can-and-cannot-open-back-up">https://krctv.com/news/coronavirus/shasta-county-is-starting-to-reopen-here-is-what-businesses-can-and-cannot-open-back-up</a>                                                                                                                                                                                                                                                                                                                   |
| Shasta     | 18-May-20 | <a href="https://www.redding.com/story/news/2020/05/18/california-coronavirus-cases-deaths-shasta-county-covid-19-update/5210369002/">https://www.redding.com/story/news/2020/05/18/california-coronavirus-cases-deaths-shasta-county-covid-19-update/5210369002/</a>                                                                                                                                                                                                                                                                                                                 |
| Shasta     | 26-May-20 | <a href="https://www.redding.com/story/news/2020/05/27/california-coronavirus-reopening-shasta-county-covid-19-cases-deaths/5263821002/">https://www.redding.com/story/news/2020/05/27/california-coronavirus-reopening-shasta-county-covid-19-cases-deaths/5263821002/</a>                                                                                                                                                                                                                                                                                                           |
| Shasta     | 4-Jun-20  | <a href="https://www.actionnewsnow.com/content/news/Shasta-County-announces-the-reopening-of-more-businesses-571064681.html">https://www.actionnewsnow.com/content/news/Shasta-County-announces-the-reopening-of-more-businesses-571064681.html</a>                                                                                                                                                                                                                                                                                                                                   |
| Shasta     | 12-Jun-20 | <a href="https://www.co.shasta.ca.us/docs/libraries/hhsa-docs/covid-19/new-sectors-reopening-06122020.pdf?sfvrsn=738ff389_0">https://www.co.shasta.ca.us/docs/libraries/hhsa-docs/covid-19/new-sectors-reopening-06122020.pdf?sfvrsn=738ff389_0</a>                                                                                                                                                                                                                                                                                                                                   |
| Shasta     | 18-Jun-20 | <a href="https://www.cdph.ca.gov/Programs/CID/DCDC/CDPH%20Document%20Library/COVID-19/Guidance-for-Face-Coverings_06-18-2020.pdf">https://www.cdph.ca.gov/Programs/CID/DCDC/CDPH%20Document%20Library/COVID-19/Guidance-for-Face-Coverings_06-18-2020.pdf</a>                                                                                                                                                                                                                                                                                                                         |
| Shasta     | 13-Jul-20 | <a href="https://www.latimes.com/california/story/2020-07-13/newsom-california-county-rollback-reopening-coronavirus">https://www.latimes.com/california/story/2020-07-13/newsom-california-county-rollback-reopening-coronavirus</a>                                                                                                                                                                                                                                                                                                                                                 |
| Shasta     | 28-Aug-20 | <a href="https://projects.sfchronicle.com/2020/coronavirus-map/california-reopening/">https://projects.sfchronicle.com/2020/coronavirus-map/california-reopening/</a>                                                                                                                                                                                                                                                                                                                                                                                                                 |
| Shasta     | 29-Sep-20 | <a href="https://www.co.shasta.ca.us/docs/libraries/hhsa-docs/covid-19/covid-19-update-092920.pdf?sfvrsn=dd41f289_2">https://www.co.shasta.ca.us/docs/libraries/hhsa-docs/covid-19/covid-19-update-092920.pdf?sfvrsn=dd41f289_2</a>                                                                                                                                                                                                                                                                                                                                                   |
| Shasta     | 9-Oct-20  | <a href="https://wp.sbcounty.gov/cao/countywire/?p=9160#:~:text=Private%20outdoor%20gatherings%20of%20three%20households%20now%20allowed%20throughout%20the%20county%2C%20state,-Published%20October%209&amp;text=Private%20outdoor%20gatherings%20of%20people,Gavin%20Newsom%20on%20Friday.">https://wp.sbcounty.gov/cao/countywire/?p=9160#:~:text=Private%20outdoor%20gatherings%20of%20three%20households%20now%20allowed%20throughout%20the%20county%2C%20state,-Published%20October%209&amp;text=Private%20outdoor%20gatherings%20of%20people,Gavin%20Newsom%20on%20Friday.</a> |
| Shasta     | 20-Oct-20 | <a href="https://www.co.shasta.ca.us/docs/libraries/hhsa-docs/covid-19/covid-19-update-102020.pdf?sfvrsn=7efff589_0">https://www.co.shasta.ca.us/docs/libraries/hhsa-docs/covid-19/covid-19-update-102020.pdf?sfvrsn=7efff589_0</a>                                                                                                                                                                                                                                                                                                                                                   |
| Shasta     | 24-Oct-20 | <a href="https://www.co.shasta.ca.us/docs/libraries/hhsa-docs/covid-19/pr-state-approves-move-back-to-red-tier-docx.pdf?sfvrsn=38f4f589_0">https://www.co.shasta.ca.us/docs/libraries/hhsa-docs/covid-19/pr-state-approves-move-back-to-red-tier-docx.pdf?sfvrsn=38f4f589_0</a>                                                                                                                                                                                                                                                                                                       |
| Shasta     | 4-Nov-20  | <a href="https://www.kcra.com/article/californias-covid-tiers-update-will-happen-nov-4/34564799">https://www.kcra.com/article/californias-covid-tiers-update-will-happen-nov-4/34564799</a>                                                                                                                                                                                                                                                                                                                                                                                           |
| Shasta     | 16-Nov-20 | <a href="https://www.cdph.ca.gov/Programs/CID/DCDC/Pages/COVID-19/guidance-for-face-coverings.aspx">https://www.cdph.ca.gov/Programs/CID/DCDC/Pages/COVID-19/guidance-for-face-coverings.aspx</a>                                                                                                                                                                                                                                                                                                                                                                                     |
| Shasta     | 19-Nov-20 | <a href="https://www.cdph.ca.gov/Programs/CID/DCDC/Pages/COVID-19/limited-stay-at-home-order.aspx">https://www.cdph.ca.gov/Programs/CID/DCDC/Pages/COVID-19/limited-stay-at-home-order.aspx</a>                                                                                                                                                                                                                                                                                                                                                                                       |
| Sierra     | 16-Mar-20 | <a href="https://sierracounty.ca.gov/DocumentCenter/View/4602/Guidance-for-High-Risk-Populations">https://sierracounty.ca.gov/DocumentCenter/View/4602/Guidance-for-High-Risk-Populations</a>                                                                                                                                                                                                                                                                                                                                                                                         |
| Sierra     | 19-Mar-20 | <a href="https://www.gov.ca.gov/wp-content/uploads/2020/03/3.19.20-attested-EO-N-33-20-COVID-19-HEALTH-ORDER.pdf">https://www.gov.ca.gov/wp-content/uploads/2020/03/3.19.20-attested-EO-N-33-20-COVID-19-HEALTH-ORDER.pdf</a>                                                                                                                                                                                                                                                                                                                                                         |
| Sierra     | 20-Mar-20 | <a href="https://sierracounty.ca.gov/DocumentCenter/View/4549/Declaration-of-Local-Health-Emergency">https://sierracounty.ca.gov/DocumentCenter/View/4549/Declaration-of-Local-Health-Emergency</a>                                                                                                                                                                                                                                                                                                                                                                                   |
| Sierra     | 20-Mar-20 | <a href="https://sierracounty.ca.gov/DocumentCenter/View/4548/200320-Closures-of-Bars-and-Onsite-Restaurant-Dining">https://sierracounty.ca.gov/DocumentCenter/View/4548/200320-Closures-of-Bars-and-Onsite-Restaurant-Dining</a>                                                                                                                                                                                                                                                                                                                                                     |
| Sierra     | 23-Mar-20 | <a href="https://sierracounty.ca.gov/DocumentCenter/View/4554/200324-PR-Short-Term-Rental-Memo-2020">https://sierracounty.ca.gov/DocumentCenter/View/4554/200324-PR-Short-Term-Rental-Memo-2020</a>                                                                                                                                                                                                                                                                                                                                                                                   |

|          |           |                                                                                                                                                                                                                                                                                                                                                                                                                                                                                                                                                                                       |
|----------|-----------|---------------------------------------------------------------------------------------------------------------------------------------------------------------------------------------------------------------------------------------------------------------------------------------------------------------------------------------------------------------------------------------------------------------------------------------------------------------------------------------------------------------------------------------------------------------------------------------|
| Sierra   | 10-Apr-20 | <a href="https://sierracounty.ca.gov/DocumentCenter/View/4604/200410-Guidance-on-Face-Coverings">https://sierracounty.ca.gov/DocumentCenter/View/4604/200410-Guidance-on-Face-Coverings</a>                                                                                                                                                                                                                                                                                                                                                                                           |
| Sierra   | 10-Apr-20 | <a href="https://sierracounty.ca.gov/DocumentCenter/View/4606/200410-Updated-Recreational-Facilities-and-Short-Term-Rental-Memo">https://sierracounty.ca.gov/DocumentCenter/View/4606/200410-Updated-Recreational-Facilities-and-Short-Term-Rental-Memo</a>                                                                                                                                                                                                                                                                                                                           |
| Sierra   | 15-Apr-20 | <a href="https://sierracounty.ca.gov/DocumentCenter/View/4621/200415-PR---Extension-for-Recreational-Facilities-and-Short-Term-Lodging-Rentals">https://sierracounty.ca.gov/DocumentCenter/View/4621/200415-PR---Extension-for-Recreational-Facilities-and-Short-Term-Lodging-Rentals</a>                                                                                                                                                                                                                                                                                             |
| Sierra   | 1-May-20  | <a href="http://sierracounty.ca.gov/DocumentCenter/View/4666/Sierra-County-Facial-Covering-Order---May-1-2020?bidid=">http://sierracounty.ca.gov/DocumentCenter/View/4666/Sierra-County-Facial-Covering-Order---May-1-2020?bidid=</a>                                                                                                                                                                                                                                                                                                                                                 |
| Sierra   | 8-May-20  | <a href="https://sierracounty.ca.gov/DocumentCenter/View/4703/Stay-At-Home-Order---Phase-2">https://sierracounty.ca.gov/DocumentCenter/View/4703/Stay-At-Home-Order---Phase-2</a>                                                                                                                                                                                                                                                                                                                                                                                                     |
| Sierra   | 13-May-20 | <a href="http://www.sierracounty.ca.gov/DocumentCenter/View/4783/PR-Variance-Stage-2">http://www.sierracounty.ca.gov/DocumentCenter/View/4783/PR-Variance-Stage-2</a>                                                                                                                                                                                                                                                                                                                                                                                                                 |
| Sierra   | 19-May-20 | <a href="https://sierracounty.ca.gov/DocumentCenter/View/4787/200519-Letter-to-Businesses---June-1">https://sierracounty.ca.gov/DocumentCenter/View/4787/200519-Letter-to-Businesses---June-1</a>                                                                                                                                                                                                                                                                                                                                                                                     |
| Sierra   | 27-May-20 | <a href="http://sierracounty.ca.gov/DocumentCenter/View/4806/PR---Faith-based-groups-5-25-20">http://sierracounty.ca.gov/DocumentCenter/View/4806/PR---Faith-based-groups-5-25-20</a>                                                                                                                                                                                                                                                                                                                                                                                                 |
| Sierra   | 6-Jun-20  | <a href="http://sierracounty.ca.gov/DocumentCenter/View/4842/PR---More-Businesses-opening-June-6-2020">http://sierracounty.ca.gov/DocumentCenter/View/4842/PR---More-Businesses-opening-June-6-2020</a>                                                                                                                                                                                                                                                                                                                                                                               |
| Sierra   | 12-Jun-20 | <a href="http://sierracounty.ca.gov/DocumentCenter/View/4857/PR---Personal-Care-Businesses-June-12-2020-v">http://sierracounty.ca.gov/DocumentCenter/View/4857/PR---Personal-Care-Businesses-June-12-2020-v</a>                                                                                                                                                                                                                                                                                                                                                                       |
| Sierra   | 18-Jun-20 | <a href="https://www.cdph.ca.gov/Programs/CID/DCDC/CDPH%20Document%20Library/COVID-19/Guidance-for-Face-Coverings_06-18-2020.pdf">https://www.cdph.ca.gov/Programs/CID/DCDC/CDPH%20Document%20Library/COVID-19/Guidance-for-Face-Coverings_06-18-2020.pdf</a>                                                                                                                                                                                                                                                                                                                         |
| Sierra   | 25-Jun-20 | <a href="http://sierracounty.ca.gov/DocumentCenter/View/4880/06-25-2020-Amended-Face-Covering-Order">http://sierracounty.ca.gov/DocumentCenter/View/4880/06-25-2020-Amended-Face-Covering-Order</a>                                                                                                                                                                                                                                                                                                                                                                                   |
| Sierra   | 13-Jul-20 | <a href="https://sierracounty.ca.gov/DocumentCenter/View/4908/Press-Release---Dimmer-Switch-On-July-13-2020">https://sierracounty.ca.gov/DocumentCenter/View/4908/Press-Release---Dimmer-Switch-On-July-13-2020</a>                                                                                                                                                                                                                                                                                                                                                                   |
| Sierra   | 11-Aug-20 | <a href="https://sierracounty.ca.gov/DocumentCenter/View/4942/PR---Fifth-Case-8-11-2020">https://sierracounty.ca.gov/DocumentCenter/View/4942/PR---Fifth-Case-8-11-2020</a>                                                                                                                                                                                                                                                                                                                                                                                                           |
| Sierra   | 14-Aug-20 | <a href="https://sierracounty.ca.gov/DocumentCenter/View/4947/PR---Sixth-Case-8-14-2020">https://sierracounty.ca.gov/DocumentCenter/View/4947/PR---Sixth-Case-8-14-2020</a>                                                                                                                                                                                                                                                                                                                                                                                                           |
| Sierra   | 17-Aug-20 | <a href="https://sierracounty.ca.gov/DocumentCenter/View/4950/PR---County-Monitoring-List-8-17-2020">https://sierracounty.ca.gov/DocumentCenter/View/4950/PR---County-Monitoring-List-8-17-2020</a>                                                                                                                                                                                                                                                                                                                                                                                   |
| Sierra   | 28-Aug-20 | <a href="https://sierracounty.ca.gov/DocumentCenter/View/4967/PR---Blueprint-8-31-20">https://sierracounty.ca.gov/DocumentCenter/View/4967/PR---Blueprint-8-31-20</a>                                                                                                                                                                                                                                                                                                                                                                                                                 |
| Sierra   | 25-Sep-20 | <a href="https://sierracounty.ca.gov/DocumentCenter/View/5017/PR---Orange-9-25-2020">https://sierracounty.ca.gov/DocumentCenter/View/5017/PR---Orange-9-25-2020</a>                                                                                                                                                                                                                                                                                                                                                                                                                   |
| Sierra   | 9-Oct-20  | <a href="https://wp.sbcounty.gov/cao/countywire/?p=9160#:~:text=Private%20outdoor%20gatherings%20of%20three%20households%20now%20allowed%20throughout%20the%20county%2C%20state,-Published%20October%209&amp;text=Private%20outdoor%20gatherings%20of%20people,Gavin%20Newsom%20on%20Friday.">https://wp.sbcounty.gov/cao/countywire/?p=9160#:~:text=Private%20outdoor%20gatherings%20of%20three%20households%20now%20allowed%20throughout%20the%20county%2C%20state,-Published%20October%209&amp;text=Private%20outdoor%20gatherings%20of%20people,Gavin%20Newsom%20on%20Friday.</a> |
| Sierra   | 13-Oct-20 | <a href="https://sierracounty.ca.gov/DocumentCenter/View/5036/PR---Hello-Yellow-10-13-2020">https://sierracounty.ca.gov/DocumentCenter/View/5036/PR---Hello-Yellow-10-13-2020</a>                                                                                                                                                                                                                                                                                                                                                                                                     |
| Sierra   | 13-Nov-20 | <a href="https://www.cdph.ca.gov/Programs/CID/DCDC/Pages/COVID-19/Guidance-for-the-Prevention-of-COVID-19-Transmission-for-Gatherings-November-2020.aspx">https://www.cdph.ca.gov/Programs/CID/DCDC/Pages/COVID-19/Guidance-for-the-Prevention-of-COVID-19-Transmission-for-Gatherings-November-2020.aspx</a>                                                                                                                                                                                                                                                                         |
| Sierra   | 17-Nov-20 | <a href="https://sierracounty.ca.gov/DocumentCenter/View/5089/Press-Release---Two-New-Cases-and-Tier-Status-Change-11-16-20">https://sierracounty.ca.gov/DocumentCenter/View/5089/Press-Release---Two-New-Cases-and-Tier-Status-Change-11-16-20</a>                                                                                                                                                                                                                                                                                                                                   |
| Sierra   | 9-Dec-20  | <a href="https://www.gov.ca.gov/wp-content/uploads/2020/12/12.3.20-Stay-at-Home-Order-ICU-Scenario.pdf">https://www.gov.ca.gov/wp-content/uploads/2020/12/12.3.20-Stay-at-Home-Order-ICU-Scenario.pdf</a>                                                                                                                                                                                                                                                                                                                                                                             |
| Siskiyou | 12-Mar-20 | <a href="https://www.co.siskiyou.ca.us/sites/default/files/fileattachments/public_health/page/16129/ph_20200312_covid-19publichealthemergencyproclamation.pdf">https://www.co.siskiyou.ca.us/sites/default/files/fileattachments/public_health/page/16129/ph_20200312_covid-19publichealthemergencyproclamation.pdf</a>                                                                                                                                                                                                                                                               |
| Siskiyou | 13-Mar-20 | <a href="https://www.co.siskiyou.ca.us/sites/default/files/fileattachments/public_health/page/18521/covid-19_public_health_alert_public_03.13.20_electronic_version.pdf">https://www.co.siskiyou.ca.us/sites/default/files/fileattachments/public_health/page/18521/covid-19_public_health_alert_public_03.13.20_electronic_version.pdf</a>                                                                                                                                                                                                                                           |
| Siskiyou | 16-Mar-20 | <a href="https://www.co.siskiyou.ca.us/sites/default/files/fileattachments/public_health/page/16138/ph_20200316_order_of_publichealthofficer.pdf">https://www.co.siskiyou.ca.us/sites/default/files/fileattachments/public_health/page/16138/ph_20200316_order_of_publichealthofficer.pdf</a>                                                                                                                                                                                                                                                                                         |
| Siskiyou | 19-Mar-20 | <a href="https://www.gov.ca.gov/wp-content/uploads/2020/03/3.19.20-attested-EO-N-33-20-COVID-19-HEALTH-ORDER.pdf">https://www.gov.ca.gov/wp-content/uploads/2020/03/3.19.20-attested-EO-N-33-20-COVID-19-HEALTH-ORDER.pdf</a>                                                                                                                                                                                                                                                                                                                                                         |
| Siskiyou | 1-Apr-20  | <a href="https://www.co.siskiyou.ca.us/sites/default/files/fileattachments/public_health/page/18521/stay_at_home_reminder_press_release_4.1.2020.pdf">https://www.co.siskiyou.ca.us/sites/default/files/fileattachments/public_health/page/18521/stay_at_home_reminder_press_release_4.1.2020.pdf</a>                                                                                                                                                                                                                                                                                 |

|          |           |                                                                                                                                                                                                                                                                                                                                                                                                                                                                                                                                                                                       |
|----------|-----------|---------------------------------------------------------------------------------------------------------------------------------------------------------------------------------------------------------------------------------------------------------------------------------------------------------------------------------------------------------------------------------------------------------------------------------------------------------------------------------------------------------------------------------------------------------------------------------------|
| Siskiyou | 7-Apr-20  | <a href="https://www.co.siskiyou.ca.us/sites/default/files/fileattachments/public_health/page/18521/ho_advisory_4.7.2020_final.pdf">https://www.co.siskiyou.ca.us/sites/default/files/fileattachments/public_health/page/18521/ho_advisory_4.7.2020_final.pdf</a>                                                                                                                                                                                                                                                                                                                     |
| Siskiyou | 8-Apr-20  | <a href="https://www.co.siskiyou.ca.us/sites/default/files/fileattachments/public_health/page/18521/mask_face_covering_letter_4.8.2020_final.pdf">https://www.co.siskiyou.ca.us/sites/default/files/fileattachments/public_health/page/18521/mask_face_covering_letter_4.8.2020_final.pdf</a>                                                                                                                                                                                                                                                                                         |
| Siskiyou | 8-May-20  | <a href="https://www.co.siskiyou.ca.us/sites/default/files/fileattachments/public_health/page/18491/siskiyou_attestation_full.pdf">https://www.co.siskiyou.ca.us/sites/default/files/fileattachments/public_health/page/18491/siskiyou_attestation_full.pdf</a>                                                                                                                                                                                                                                                                                                                       |
| Siskiyou | 15-May-20 | <a href="https://www.co.siskiyou.ca.us/sites/default/files/fileattachments/public_health/page/18541/extended_phase_2_5.14.2020.pdf">https://www.co.siskiyou.ca.us/sites/default/files/fileattachments/public_health/page/18541/extended_phase_2_5.14.2020.pdf</a>                                                                                                                                                                                                                                                                                                                     |
| Siskiyou | 26-May-20 | <a href="https://www.co.siskiyou.ca.us/sites/default/files/fileattachments/public_health/page/18521/siskiyou_county_press_release_worship_and_salons_updated_6.10.20.pdf">https://www.co.siskiyou.ca.us/sites/default/files/fileattachments/public_health/page/18521/siskiyou_county_press_release_worship_and_salons_updated_6.10.20.pdf</a>                                                                                                                                                                                                                                         |
| Siskiyou | 16-Jun-20 | <a href="https://www.co.siskiyou.ca.us/sites/default/files/fileattachments/public_health/page/18521/update_press_release_6.16.2020_final.pdf">https://www.co.siskiyou.ca.us/sites/default/files/fileattachments/public_health/page/18521/update_press_release_6.16.2020_final.pdf</a>                                                                                                                                                                                                                                                                                                 |
| Siskiyou | 18-Jun-20 | <a href="https://www.cdph.ca.gov/Programs/CID/DCDC/CDPH%20Document%20Library/COVID-19/Guidance-for-Face-Coverings_06-18-2020.pdf">https://www.cdph.ca.gov/Programs/CID/DCDC/CDPH%20Document%20Library/COVID-19/Guidance-for-Face-Coverings_06-18-2020.pdf</a>                                                                                                                                                                                                                                                                                                                         |
| Siskiyou | 19-Jun-20 | <a href="https://www.co.siskiyou.ca.us/sites/default/files/fileattachments/public_health/page/18521/update_press_release_6.16.2020_final.pdf">https://www.co.siskiyou.ca.us/sites/default/files/fileattachments/public_health/page/18521/update_press_release_6.16.2020_final.pdf</a>                                                                                                                                                                                                                                                                                                 |
| Siskiyou | 13-Jul-20 | <a href="https://www.latimes.com/california/story/2020-07-13/newsom-california-county-rollback-reopening-coronavirus">https://www.latimes.com/california/story/2020-07-13/newsom-california-county-rollback-reopening-coronavirus</a>                                                                                                                                                                                                                                                                                                                                                 |
| Siskiyou | 18-Aug-20 | <a href="https://www.co.siskiyou.ca.us/sites/default/files/fileattachments/public_health/page/18531/scoe_reopening_orders_8-18-20_signed.pdf">https://www.co.siskiyou.ca.us/sites/default/files/fileattachments/public_health/page/18531/scoe_reopening_orders_8-18-20_signed.pdf</a>                                                                                                                                                                                                                                                                                                 |
| Siskiyou | 28-Aug-20 | <a href="https://projects.sfchronicle.com/2020/coronavirus-map/california-reopening/">https://projects.sfchronicle.com/2020/coronavirus-map/california-reopening/</a>                                                                                                                                                                                                                                                                                                                                                                                                                 |
| Siskiyou | 6-Oct-20  | <a href="https://www.oregister.com/2020/10/06/coronavirus-state-tracker-heres-where-every-county-stands-in-the-states-tier-system-on-oct-6/">https://www.oregister.com/2020/10/06/coronavirus-state-tracker-heres-where-every-county-stands-in-the-states-tier-system-on-oct-6/</a>                                                                                                                                                                                                                                                                                                   |
| Siskiyou | 9-Oct-20  | <a href="https://wp.sbcounty.gov/cao/countywire/?p=9160#:~:text=Private%20outdoor%20gatherings%20of%20three%20households%20now%20allowed%20throughout%20the%20county%2C%20state,-Published%20October%209&amp;text=Private%20outdoor%20gatherings%20of%20people,Gavin%20Newsom%20on%20Friday.">https://wp.sbcounty.gov/cao/countywire/?p=9160#:~:text=Private%20outdoor%20gatherings%20of%20three%20households%20now%20allowed%20throughout%20the%20county%2C%20state,-Published%20October%209&amp;text=Private%20outdoor%20gatherings%20of%20people,Gavin%20Newsom%20on%20Friday.</a> |
| Siskiyou | 10-Nov-20 | <a href="https://www.co.siskiyou.ca.us/sites/default/files/fileattachments/public_health/page/18491/press_release_-_move_to_tier_3.pdf">https://www.co.siskiyou.ca.us/sites/default/files/fileattachments/public_health/page/18491/press_release_-_move_to_tier_3.pdf</a>                                                                                                                                                                                                                                                                                                             |
| Siskiyou | 13-Nov-20 | <a href="https://www.cdph.ca.gov/Programs/CID/DCDC/Pages/COVID-19/Guidance-for-the-Prevention-of-COVID-19-Transmission-for-Gatherings-November-2020.aspx">https://www.cdph.ca.gov/Programs/CID/DCDC/Pages/COVID-19/Guidance-for-the-Prevention-of-COVID-19-Transmission-for-Gatherings-November-2020.aspx</a>                                                                                                                                                                                                                                                                         |
| Siskiyou | 16-Nov-20 | <a href="https://www.cdph.ca.gov/Programs/CID/DCDC/Pages/COVID-19/guidance-for-face-coverings.aspx">https://www.cdph.ca.gov/Programs/CID/DCDC/Pages/COVID-19/guidance-for-face-coverings.aspx</a>                                                                                                                                                                                                                                                                                                                                                                                     |
| Siskiyou | 17-Nov-20 | <a href="https://www.co.siskiyou.ca.us/sites/default/files/fileattachments/public_health/page/18491/press_release_-_move_to_tier_1.pdf">https://www.co.siskiyou.ca.us/sites/default/files/fileattachments/public_health/page/18491/press_release_-_move_to_tier_1.pdf</a>                                                                                                                                                                                                                                                                                                             |
| Siskiyou | 19-Nov-20 | <a href="https://www.cdph.ca.gov/Programs/CID/DCDC/Pages/COVID-19/limited-stay-at-home-order.aspx">https://www.cdph.ca.gov/Programs/CID/DCDC/Pages/COVID-19/limited-stay-at-home-order.aspx</a>                                                                                                                                                                                                                                                                                                                                                                                       |
| Solano   | 27-Feb-20 | <a href="https://www.solanocounty.com/news/displaynews.asp?NewsID=1261&amp;TargetID=1">https://www.solanocounty.com/news/displaynews.asp?NewsID=1261&amp;TargetID=1</a>                                                                                                                                                                                                                                                                                                                                                                                                               |
| Solano   | 11-Mar-20 | <a href="https://web.archive.org/web/20200423081723/https://admin.solanocounty.com:4433/civicax/filebank/blobdload.aspx?BlobID=31788">https://web.archive.org/web/20200423081723/https://admin.solanocounty.com:4433/civicax/filebank/blobdload.aspx?BlobID=31788</a>                                                                                                                                                                                                                                                                                                                 |
| Solano   | 18-Mar-20 | <a href="https://web.archive.org/web/20200413221601/https://admin.solanocounty.com:4433/civicax/filebank/blobdload.aspx?BlobID=31829">https://web.archive.org/web/20200413221601/https://admin.solanocounty.com:4433/civicax/filebank/blobdload.aspx?BlobID=31829</a>                                                                                                                                                                                                                                                                                                                 |
| Solano   | 19-Mar-20 | <a href="https://www.gov.ca.gov/wp-content/uploads/2020/03/3.19.20-attested-EO-N-33-20-COVID-19-HEALTH-ORDER.pdf">https://www.gov.ca.gov/wp-content/uploads/2020/03/3.19.20-attested-EO-N-33-20-COVID-19-HEALTH-ORDER.pdf</a>                                                                                                                                                                                                                                                                                                                                                         |
| Solano   | 24-Mar-20 | <a href="https://www.solanocounty.com/civicax/filebank/blobdload.aspx?BlobID=31869">https://www.solanocounty.com/civicax/filebank/blobdload.aspx?BlobID=31869</a>                                                                                                                                                                                                                                                                                                                                                                                                                     |
| Solano   | 30-Mar-20 | <a href="https://web.archive.org/web/20200402223451/https://admin.solanocounty.com:4433/civicax/filebank/blobdload.aspx?BlobID=31932">https://web.archive.org/web/20200402223451/https://admin.solanocounty.com:4433/civicax/filebank/blobdload.aspx?BlobID=31932</a>                                                                                                                                                                                                                                                                                                                 |
| Solano   | 6-Apr-20  | <a href="https://web.archive.org/web/20200427155709/https://admin.solanocounty.com:4433/depts/ph/coronavirus_links/faq__face_coverings.asp">https://web.archive.org/web/20200427155709/https://admin.solanocounty.com:4433/depts/ph/coronavirus_links/faq__face_coverings.asp</a>                                                                                                                                                                                                                                                                                                     |
| Solano   | 24-Apr-20 | <a href="https://web.archive.org/web/20200505142524/https://admin.solanocounty.com:4433/news/displaynews.asp?NewsID=2290&amp;TargetID=1">https://web.archive.org/web/20200505142524/https://admin.solanocounty.com:4433/news/displaynews.asp?NewsID=2290&amp;TargetID=1</a>                                                                                                                                                                                                                                                                                                           |
| Solano   | 28-Apr-20 | <a href="https://www.ci.benicia.ca.us/vertical/Sites/%7BF991A639-AAED-4E1A-9735-86EA195E2C8D%7D/uploads/Item_36_Adopted_Resolution_Emergency_Regulation_Eviction_Moratorium_(1).pdf">https://www.ci.benicia.ca.us/vertical/Sites/%7BF991A639-AAED-4E1A-9735-86EA195E2C8D%7D/uploads/Item_36_Adopted_Resolution_Emergency_Regulation_Eviction_Moratorium_(1).pdf</a>                                                                                                                                                                                                                   |
| Solano   | 1-May-20  | <a href="https://web.archive.org/web/20200520015445/https://www.solanocounty.com/civicax/filebank/blobdload.aspx?BlobID=32183">https://web.archive.org/web/20200520015445/https://www.solanocounty.com/civicax/filebank/blobdload.aspx?BlobID=32183</a>                                                                                                                                                                                                                                                                                                                               |

|        |           |                                                                                                                                                                                                                                                                                                                                                                                                                                                                                                                                                                                       |
|--------|-----------|---------------------------------------------------------------------------------------------------------------------------------------------------------------------------------------------------------------------------------------------------------------------------------------------------------------------------------------------------------------------------------------------------------------------------------------------------------------------------------------------------------------------------------------------------------------------------------------|
| Solano | 7-May-20  | <a href="https://web.archive.org/web/20200521204427/https://admin.solanocounty.com:4433/civicax/filebank/blobdload.aspx?BlobID=32212">https://web.archive.org/web/20200521204427/https://admin.solanocounty.com:4433/civicax/filebank/blobdload.aspx?BlobID=32212</a>                                                                                                                                                                                                                                                                                                                 |
| Solano | 21-May-20 | <a href="https://web.archive.org/web/20200528021727/http://www.solanocounty.com/civicax/filebank/blobdload.aspx?BlobID=32289">https://web.archive.org/web/20200528021727/http://www.solanocounty.com/civicax/filebank/blobdload.aspx?BlobID=32289</a>                                                                                                                                                                                                                                                                                                                                 |
| Solano | 26-May-20 | <a href="https://web.archive.org/web/20200528021727/http://www.solanocounty.com/civicax/filebank/blobdload.aspx?BlobID=32289">https://web.archive.org/web/20200528021727/http://www.solanocounty.com/civicax/filebank/blobdload.aspx?BlobID=32289</a>                                                                                                                                                                                                                                                                                                                                 |
| Solano | 7-Jun-20  | <a href="https://web.archive.org/web/20200618112047/https://admin.solanocounty.com:4433/civicax/filebank/blobdload.aspx?BlobID=32443">https://web.archive.org/web/20200618112047/https://admin.solanocounty.com:4433/civicax/filebank/blobdload.aspx?BlobID=32443</a>                                                                                                                                                                                                                                                                                                                 |
| Solano | 12-Jun-20 | <a href="https://web.archive.org/web/20200618112047/https://admin.solanocounty.com:4433/civicax/filebank/blobdload.aspx?BlobID=32443">https://web.archive.org/web/20200618112047/https://admin.solanocounty.com:4433/civicax/filebank/blobdload.aspx?BlobID=32443</a>                                                                                                                                                                                                                                                                                                                 |
| Solano | 16-Jun-20 | <a href="https://web.archive.org/web/20200618112047/https://admin.solanocounty.com:4433/civicax/filebank/blobdload.aspx?BlobID=32443">https://web.archive.org/web/20200618112047/https://admin.solanocounty.com:4433/civicax/filebank/blobdload.aspx?BlobID=32443</a>                                                                                                                                                                                                                                                                                                                 |
| Solano | 18-Jun-20 | <a href="https://www.cdph.ca.gov/Programs/CID/DCDC/CDPH%20Document%20Library/COVID-19/Guidance-for-Face-Coverings_06-18-2020.pdf">https://www.cdph.ca.gov/Programs/CID/DCDC/CDPH%20Document%20Library/COVID-19/Guidance-for-Face-Coverings_06-18-2020.pdf</a>                                                                                                                                                                                                                                                                                                                         |
| Solano | 19-Jun-20 | <a href="https://web.archive.org/web/20200618112047/https://admin.solanocounty.com:4433/civicax/filebank/blobdload.aspx?BlobID=32443">https://web.archive.org/web/20200618112047/https://admin.solanocounty.com:4433/civicax/filebank/blobdload.aspx?BlobID=32443</a>                                                                                                                                                                                                                                                                                                                 |
| Solano | 1-Jul-20  | <a href="https://www.cdph.ca.gov/Programs/OPA/Pages/NR20-143.aspx">https://www.cdph.ca.gov/Programs/OPA/Pages/NR20-143.aspx</a>                                                                                                                                                                                                                                                                                                                                                                                                                                                       |
| Solano | 13-Jul-20 | <a href="http://www.solanocounty.com/civicax/filebank/blobdload.aspx?BlobID=32641">http://www.solanocounty.com/civicax/filebank/blobdload.aspx?BlobID=32641</a>                                                                                                                                                                                                                                                                                                                                                                                                                       |
| Solano | 13-Jul-20 | <a href="https://www.latimes.com/california/story/2020-07-13/newsom-california-county-rollback-reopening-coronavirus">https://www.latimes.com/california/story/2020-07-13/newsom-california-county-rollback-reopening-coronavirus</a>                                                                                                                                                                                                                                                                                                                                                 |
| Solano | 17-Jul-20 | <a href="https://www.cdph.ca.gov/Programs/CID/DCDC/CDPH%20Document%20Library/COVID-19/Schools%20Reopening%20Recommendations.pdf">https://www.cdph.ca.gov/Programs/CID/DCDC/CDPH%20Document%20Library/COVID-19/Schools%20Reopening%20Recommendations.pdf</a>                                                                                                                                                                                                                                                                                                                           |
| Solano | 27-Jul-20 | <a href="https://web.archive.org/web/20200727093803/https://www.solanocounty.com/depts/ph/coronavirus_links/faq_isolation_and_exposure.asp">https://web.archive.org/web/20200727093803/https://www.solanocounty.com/depts/ph/coronavirus_links/faq_isolation_and_exposure.asp</a>                                                                                                                                                                                                                                                                                                     |
| Solano | 28-Aug-20 | <a href="https://abc7news.com/ca-reopneing-phases-covid19cagov-gavin-newsom-update-california-salon-reopening/6393805/">https://abc7news.com/ca-reopneing-phases-covid19cagov-gavin-newsom-update-california-salon-reopening/6393805/</a>                                                                                                                                                                                                                                                                                                                                             |
| Solano | 1-Sep-20  | <a href="https://admin.solanocounty.com:4433/civicax/filebank/blobdload.aspx?BlobID=33033">https://admin.solanocounty.com:4433/civicax/filebank/blobdload.aspx?BlobID=33033</a>                                                                                                                                                                                                                                                                                                                                                                                                       |
| Solano | 22-Sep-20 | <a href="https://projects.sfchronicle.com/2020/coronavirus-map/california-reopening/">https://projects.sfchronicle.com/2020/coronavirus-map/california-reopening/</a>                                                                                                                                                                                                                                                                                                                                                                                                                 |
| Solano | 9-Oct-20  | <a href="https://wp.sbcounty.gov/cao/countywire/?p=9160#:~:text=Private%20outdoor%20gatherings%20of%20three%20households%20now%20allowed%20throughout%20the%20county%2C%20state,-Published%20October%209&amp;text=Private%20outdoor%20gatherings%20of%20people,Gavin%20Newsom%20on%20Friday.">https://wp.sbcounty.gov/cao/countywire/?p=9160#:~:text=Private%20outdoor%20gatherings%20of%20three%20households%20now%20allowed%20throughout%20the%20county%2C%20state,-Published%20October%209&amp;text=Private%20outdoor%20gatherings%20of%20people,Gavin%20Newsom%20on%20Friday.</a> |
| Solano | 13-Nov-20 | <a href="https://www.cdph.ca.gov/Programs/CID/DCDC/Pages/COVID-19/Guidance-for-the-Prevention-of-COVID-19-Transmission-for-Gatherings-November-2020.aspx">https://www.cdph.ca.gov/Programs/CID/DCDC/Pages/COVID-19/Guidance-for-the-Prevention-of-COVID-19-Transmission-for-Gatherings-November-2020.aspx</a>                                                                                                                                                                                                                                                                         |
| Solano | 16-Nov-20 | <a href="https://www.cdph.ca.gov/Programs/CID/DCDC/Pages/COVID-19/guidance-for-face-coverings.aspx">https://www.cdph.ca.gov/Programs/CID/DCDC/Pages/COVID-19/guidance-for-face-coverings.aspx</a>                                                                                                                                                                                                                                                                                                                                                                                     |
| Solano | 17-Nov-20 | <a href="https://kmph.com/news/local/40-california-counties-in-purple-tier-including-the-central-valley">https://kmph.com/news/local/40-california-counties-in-purple-tier-including-the-central-valley</a>                                                                                                                                                                                                                                                                                                                                                                           |
| Solano | 19-Nov-20 | <a href="https://www.cdph.ca.gov/Programs/CID/DCDC/Pages/COVID-19/limited-stay-at-home-order.aspx">https://www.cdph.ca.gov/Programs/CID/DCDC/Pages/COVID-19/limited-stay-at-home-order.aspx</a>                                                                                                                                                                                                                                                                                                                                                                                       |
| Solano | 16-Dec-20 | <a href="https://www.gov.ca.gov/wp-content/uploads/2020/12/12.3.20-Stay-at-Home-Order-ICU-Scenario.pdf">https://www.gov.ca.gov/wp-content/uploads/2020/12/12.3.20-Stay-at-Home-Order-ICU-Scenario.pdf</a>                                                                                                                                                                                                                                                                                                                                                                             |
| Sonoma | 2-Mar-20  | <a href="https://sonomacounty.ca.gov/Health/Press-Releases/Local-Emergency-Declared-for-COVID-19/">https://sonomacounty.ca.gov/Health/Press-Releases/Local-Emergency-Declared-for-COVID-19/</a>                                                                                                                                                                                                                                                                                                                                                                                       |
| Sonoma | 13-Mar-20 | <a href="https://www.pressdemocrat.com/article/news/sonoma-countys-health-officer-orders-cancellation-of-gatherings-of-250-or/">https://www.pressdemocrat.com/article/news/sonoma-countys-health-officer-orders-cancellation-of-gatherings-of-250-or/</a>                                                                                                                                                                                                                                                                                                                             |
| Sonoma | 17-Mar-20 | <a href="https://socoemergency.org/order-of-the-health-officer-shelter-in-place/">https://socoemergency.org/order-of-the-health-officer-shelter-in-place/</a>                                                                                                                                                                                                                                                                                                                                                                                                                         |
| Sonoma | 19-Mar-20 | <a href="https://www.gov.ca.gov/wp-content/uploads/2020/03/3.19.20-attested-EO-N-33-20-COVID-19-HEALTH-ORDER.pdf">https://www.gov.ca.gov/wp-content/uploads/2020/03/3.19.20-attested-EO-N-33-20-COVID-19-HEALTH-ORDER.pdf</a>                                                                                                                                                                                                                                                                                                                                                         |
| Sonoma | 23-Mar-20 | <a href="https://socoemergency.org/order-of-the-health-officer-closing-parks/">https://socoemergency.org/order-of-the-health-officer-closing-parks/</a>                                                                                                                                                                                                                                                                                                                                                                                                                               |
| Sonoma | 25-Mar-20 | <a href="https://patch.com/california/walnutcreek/contra-costa-county-school-closure-extended-through-may-1">https://patch.com/california/walnutcreek/contra-costa-county-school-closure-extended-through-may-1</a>                                                                                                                                                                                                                                                                                                                                                                   |

|        |           |                                                                                                                                                                                                                                                                                                                                                                                                                                                                                                                                                                                       |
|--------|-----------|---------------------------------------------------------------------------------------------------------------------------------------------------------------------------------------------------------------------------------------------------------------------------------------------------------------------------------------------------------------------------------------------------------------------------------------------------------------------------------------------------------------------------------------------------------------------------------------|
| Sonoma | 31-Mar-20 | <a href="https://socoemergency.org/order-of-the-health-officer-shelter-in-place-extended/">https://socoemergency.org/order-of-the-health-officer-shelter-in-place-extended/</a>                                                                                                                                                                                                                                                                                                                                                                                                       |
| Sonoma | 5-Apr-20  | <a href="https://socoemergency.org/health-officer-guidance-on-face-coverings-for-general-public-in-all-age-groups/">https://socoemergency.org/health-officer-guidance-on-face-coverings-for-general-public-in-all-age-groups/</a>                                                                                                                                                                                                                                                                                                                                                     |
| Sonoma | 10-Apr-20 | <a href="https://socoemergency.org/order-of-the-health-officer-quarantine-order-for-covid-19/">https://socoemergency.org/order-of-the-health-officer-quarantine-order-for-covid-19/</a>                                                                                                                                                                                                                                                                                                                                                                                               |
| Sonoma | 13-Apr-20 | <a href="https://socoemergency.org/order-of-the-health-officer-facial-coverings/">https://socoemergency.org/order-of-the-health-officer-facial-coverings/</a>                                                                                                                                                                                                                                                                                                                                                                                                                         |
| Sonoma | 16-Apr-20 | <a href="https://socoemergency.org/order-of-the-health-officer-congregate-care-living-facilities/">https://socoemergency.org/order-of-the-health-officer-congregate-care-living-facilities/</a>                                                                                                                                                                                                                                                                                                                                                                                       |
| Sonoma | 24-Apr-20 | <a href="https://socoemergency.org/amendment-to-health-order-no-c19-08/">https://socoemergency.org/amendment-to-health-order-no-c19-08/</a>                                                                                                                                                                                                                                                                                                                                                                                                                                           |
| Sonoma | 28-Apr-20 | <a href="https://socoemergency.org/order-of-the-health-officer-amended-parks-closure-order/">https://socoemergency.org/order-of-the-health-officer-amended-parks-closure-order/</a>                                                                                                                                                                                                                                                                                                                                                                                                   |
| Sonoma | 1-May-20  | <a href="https://socoemergency.org/order-of-the-health-officer-no-19-09-shelter-in-place-extended/">https://socoemergency.org/order-of-the-health-officer-no-19-09-shelter-in-place-extended/</a>                                                                                                                                                                                                                                                                                                                                                                                     |
| Sonoma | 7-May-20  | <a href="https://sanfrancisco.cbslocal.com/2020/05/08/sonoma-county-coronavirus-covid-19-phase-2-reopening-business-curb-side-pickup-delivery/">https://sanfrancisco.cbslocal.com/2020/05/08/sonoma-county-coronavirus-covid-19-phase-2-reopening-business-curb-side-pickup-delivery/</a>                                                                                                                                                                                                                                                                                             |
| Sonoma | 12-May-20 | <a href="https://socoemergency.org/order-of-the-health-officer-c19-11-amended-parks-closure-order/">https://socoemergency.org/order-of-the-health-officer-c19-11-amended-parks-closure-order/</a>                                                                                                                                                                                                                                                                                                                                                                                     |
| Sonoma | 14-May-20 | <a href="https://socoemergency.org/amendment-no-2-to-health-order-no-c19-09-essential-businesses/">https://socoemergency.org/amendment-no-2-to-health-order-no-c19-09-essential-businesses/</a>                                                                                                                                                                                                                                                                                                                                                                                       |
| Sonoma | 18-May-20 | <a href="https://socoemergency.org/public-health-emergency-isolation-order-no-c19-12-i-for-covid-19/">https://socoemergency.org/public-health-emergency-isolation-order-no-c19-12-i-for-covid-19/</a>                                                                                                                                                                                                                                                                                                                                                                                 |
| Sonoma | 22-May-20 | <a href="https://socoemergency.org/amendment-no-3-to-health-order-no-c19-09/">https://socoemergency.org/amendment-no-3-to-health-order-no-c19-09/</a>                                                                                                                                                                                                                                                                                                                                                                                                                                 |
| Sonoma | 2-Jun-20  | <a href="https://socoemergency.org/june-2-amendment-to-health-order-no-c19-13/">https://socoemergency.org/june-2-amendment-to-health-order-no-c19-13/</a>                                                                                                                                                                                                                                                                                                                                                                                                                             |
| Sonoma | 5-Jun-20  | <a href="https://socoemergency.org/order-of-the-health-officer-c19-14-stay-well-sonoma-county/">https://socoemergency.org/order-of-the-health-officer-c19-14-stay-well-sonoma-county/</a>                                                                                                                                                                                                                                                                                                                                                                                             |
| Sonoma | 11-Jun-20 | <a href="https://socoemergency.org/17932-2/">https://socoemergency.org/17932-2/</a>                                                                                                                                                                                                                                                                                                                                                                                                                                                                                                   |
| Sonoma | 18-Jun-20 | <a href="https://web.archive.org/web/20200621192448/https://socoemergency.org/order-of-the-health-officer-c19-15-stay-well-sonoma-county/">https://web.archive.org/web/20200621192448/https://socoemergency.org/order-of-the-health-officer-c19-15-stay-well-sonoma-county/</a>                                                                                                                                                                                                                                                                                                       |
| Sonoma | 18-Jun-20 | <a href="https://www.cdph.ca.gov/Programs/CID/DCDC/CDPH%20Document%20Library/COVID-19/Guidance-for-Face-Coverings_06-18-2020.pdf">https://www.cdph.ca.gov/Programs/CID/DCDC/CDPH%20Document%20Library/COVID-19/Guidance-for-Face-Coverings_06-18-2020.pdf</a>                                                                                                                                                                                                                                                                                                                         |
| Sonoma | 13-Jul-20 | <a href="https://www.latimes.com/california/story/2020-07-13/newsom-california-county-rollback-reopening-coronavirus">https://www.latimes.com/california/story/2020-07-13/newsom-california-county-rollback-reopening-coronavirus</a>                                                                                                                                                                                                                                                                                                                                                 |
| Sonoma | 13-Jul-20 | <a href="https://socoemergency.org/emergency/novel-coronavirus/state-health-order-july-13/">https://socoemergency.org/emergency/novel-coronavirus/state-health-order-july-13/</a>                                                                                                                                                                                                                                                                                                                                                                                                     |
| Sonoma | 17-Jul-20 | <a href="https://www.cdph.ca.gov/Programs/CID/DCDC/CDPH%20Document%20Library/COVID-19/Schools%20Reopening%20Recommendations.pdf">https://www.cdph.ca.gov/Programs/CID/DCDC/CDPH%20Document%20Library/COVID-19/Schools%20Reopening%20Recommendations.pdf</a>                                                                                                                                                                                                                                                                                                                           |
| Sonoma | 22-Jul-20 | <a href="https://socoemergency.org/order-of-the-health-officer-c19-16-i-updated-isolation-order/">https://socoemergency.org/order-of-the-health-officer-c19-16-i-updated-isolation-order/</a>                                                                                                                                                                                                                                                                                                                                                                                         |
| Sonoma | 6-Aug-20  | <a href="https://socoemergency.org/urgency-ordinance-authorizing-enforcement-of-covid-19-health-orders/">https://socoemergency.org/urgency-ordinance-authorizing-enforcement-of-covid-19-health-orders/</a>                                                                                                                                                                                                                                                                                                                                                                           |
| Sonoma | 28-Aug-20 | <a href="https://abc7news.com/ca-reopneing-phases-covid19cagov-gavin-newsom-update-california-salon-reopening/6393805/">https://abc7news.com/ca-reopneing-phases-covid19cagov-gavin-newsom-update-california-salon-reopening/6393805/</a>                                                                                                                                                                                                                                                                                                                                             |
| Sonoma | 8-Sep-20  | <a href="https://socoemergency.org/amendment-to-health-order-no-2-c19-08-congregate-care-living-facilities/">https://socoemergency.org/amendment-to-health-order-no-2-c19-08-congregate care-living-facilities/</a>                                                                                                                                                                                                                                                                                                                                                                   |
| Sonoma | 22-Sep-20 | <a href="https://files.covid19.ca.gov/pdf/guidance-expanded-personal-care-services--en.pdf">https://files.covid19.ca.gov/pdf/guidance-expanded-personal-care-services--en.pdf</a>                                                                                                                                                                                                                                                                                                                                                                                                     |
| Sonoma | 9-Oct-20  | <a href="https://wp.sbcounty.gov/cao/countywire/?p=9160#:~:text=Private%20outdoor%20gatherings%20of%20three%20households%20now%20allowed%20throughout%20the%20county%2C%20state,-Published%20October%209&amp;text=Private%20outdoor%20gatherings%20of%20people,Gavin%20Newsom%20on%20Friday.">https://wp.sbcounty.gov/cao/countywire/?p=9160#:~:text=Private%20outdoor%20gatherings%20of%20three%20households%20now%20allowed%20throughout%20the%20county%2C%20state,-Published%20October%209&amp;text=Private%20outdoor%20gatherings%20of%20people,Gavin%20Newsom%20on%20Friday.</a> |
| Sonoma | 19-Nov-20 | <a href="https://www.cdph.ca.gov/Programs/CID/DCDC/Pages/COVID-19/limited-stay-at-home-order.aspx">https://www.cdph.ca.gov/Programs/CID/DCDC/Pages/COVID-19/limited-stay-at-home-order.aspx</a>                                                                                                                                                                                                                                                                                                                                                                                       |

|            |           |                                                                                                                                                                                                                                                                             |
|------------|-----------|-----------------------------------------------------------------------------------------------------------------------------------------------------------------------------------------------------------------------------------------------------------------------------|
| Sonoma     | 16-Dec-20 | <a href="https://www.gov.ca.gov/wp-content/uploads/2020/12/12.3.20-Stay-at-Home-Order-ICU-Scenario.pdf">https://www.gov.ca.gov/wp-content/uploads/2020/12/12.3.20-Stay-at-Home-Order-ICU-Scenario.pdf</a>                                                                   |
| Stanislaus | 11-Mar-20 | <a href="http://schsa.org/pdf/press-releases/2020/20-02-covid.pdf">http://schsa.org/pdf/press-releases/2020/20-02-covid.pdf</a>                                                                                                                                             |
| Stanislaus | 12-Mar-20 | <a href="https://web.archive.org/web/20200514114853/http://schsa.org/publichealth/pages/corona-virus/pdf/comm-gather.pdf">https://web.archive.org/web/20200514114853/http://schsa.org/publichealth/pages/corona-virus/pdf/comm-gather.pdf</a>                               |
| Stanislaus | 13-Mar-20 | <a href="http://schsa.org/publichealth/pages/corona-virus/pdf/school-closure-guidance.pdf">http://schsa.org/publichealth/pages/corona-virus/pdf/school-closure-guidance.pdf</a>                                                                                             |
| Stanislaus | 19-Mar-20 | <a href="https://www.gov.ca.gov/wp-content/uploads/2020/03/3.19.20-attested-EO-N-33-20-COVID-19-HEALTH-ORDER.pdf">https://www.gov.ca.gov/wp-content/uploads/2020/03/3.19.20-attested-EO-N-33-20-COVID-19-HEALTH-ORDER.pdf</a>                                               |
| Stanislaus | 30-Mar-20 | <a href="https://www.modbee.com/news/local/article241624411.html">https://www.modbee.com/news/local/article241624411.html</a>                                                                                                                                               |
| Stanislaus | 31-Mar-20 | <a href="https://web.archive.org/web/20200407024609/http://www.schsa.org/PublicHealth/pages/corona-virus/pdf/health-order-mar-31.pdf">https://web.archive.org/web/20200407024609/http://www.schsa.org/PublicHealth/pages/corona-virus/pdf/health-order-mar-31.pdf</a>       |
| Stanislaus | 7-Apr-20  | <a href="http://schsa.org/PublicHealth/pages/corona-virus/pdf/quarantine-order-en.pdf">http://schsa.org/PublicHealth/pages/corona-virus/pdf/quarantine-order-en.pdf</a>                                                                                                     |
| Stanislaus | 22-Apr-20 | <a href="https://web.archive.org/web/20200505121330/http://www.schsa.org/PublicHealth/pages/corona-virus/pdf/health-order-apr-22-en.pdf">https://web.archive.org/web/20200505121330/http://www.schsa.org/PublicHealth/pages/corona-virus/pdf/health-order-apr-22-en.pdf</a> |
| Stanislaus | 28-Apr-20 | <a href="https://web.archive.org/web/20200514094334/http://schsa.org/PublicHealth/pages/corona-virus/pdf/home-isolation-guidance-en.pdf">https://web.archive.org/web/20200514094334/http://schsa.org/PublicHealth/pages/corona-virus/pdf/home-isolation-guidance-en.pdf</a> |
| Stanislaus | 1-May-20  | <a href="http://schsa.org/PublicHealth/pages/corona-virus/pdf/congregate-living-order.pdf">http://schsa.org/PublicHealth/pages/corona-virus/pdf/congregate-living-order.pdf</a>                                                                                             |
| Stanislaus | 5-May-20  | <a href="https://www.stancoe.org/sites/default/files/administration/Communications/COVID19/05.05.2020%20Health%20Order%20Stan%20Co.pdf">https://www.stancoe.org/sites/default/files/administration/Communications/COVID19/05.05.2020%20Health%20Order%20Stan%20Co.pdf</a>   |
| Stanislaus | 12-May-20 | <a href="http://schsa.org/PublicHealth/pages/corona-virus/pdf/food-prep-en.pdf">http://schsa.org/PublicHealth/pages/corona-virus/pdf/food-prep-en.pdf</a>                                                                                                                   |
| Stanislaus | 12-May-20 | <a href="http://schsa.org/PublicHealth/pages/corona-virus/pdf/health-order-may-12-en.pdf">http://schsa.org/PublicHealth/pages/corona-virus/pdf/health-order-may-12-en.pdf</a>                                                                                               |
| Stanislaus | 15-May-20 | <a href="http://schsa.org/pdf/press-releases/2020/20-20-ph-attestation-en.pdf">http://schsa.org/pdf/press-releases/2020/20-20-ph-attestation-en.pdf</a>                                                                                                                     |
| Stanislaus | 20-May-20 | <a href="http://schsa.org/pdf/press-releases/2020/20-21-variance-approval.pdf">http://schsa.org/pdf/press-releases/2020/20-21-variance-approval.pdf</a>                                                                                                                     |
| Stanislaus | 26-May-20 | <a href="http://schsa.org/pdf/press-releases/2020/20-22-safe-worship-en.pdf">http://schsa.org/pdf/press-releases/2020/20-22-safe-worship-en.pdf</a>                                                                                                                         |
| Stanislaus | 8-Jun-20  | <a href="http://schsa.org/pdf/press-releases/2020/20-26-stan-county-additonal-sectors.pdf">http://schsa.org/pdf/press-releases/2020/20-26-stan-county-additonal-sectors.pdf</a>                                                                                             |
| Stanislaus | 17-Jun-20 | <a href="https://www.kcra.com/article/stanislaus-county-mandatory-face-coverings-in-public-covid-19/32898646#">https://www.kcra.com/article/stanislaus-county-mandatory-face-coverings-in-public-covid-19/32898646#</a>                                                     |
| Stanislaus | 18-Jun-20 | <a href="https://www.cdph.ca.gov/Programs/CID/DCDC/CDPH%20Document%20Library/COVID-19/Guidance-for-Face-Coverings_06-18-2020.pdf">https://www.cdph.ca.gov/Programs/CID/DCDC/CDPH%20Document%20Library/COVID-19/Guidance-for-Face-Coverings_06-18-2020.pdf</a>               |
| Stanislaus | 28-Jun-20 | <a href="https://www.modbee.com/news/coronavirus/article243872707.html">https://www.modbee.com/news/coronavirus/article243872707.html</a>                                                                                                                                   |
| Stanislaus | 2-Jul-20  | <a href="http://schsa.org/pdf/press-releases/2020/20-29-PHO.pdf">http://schsa.org/pdf/press-releases/2020/20-29-PHO.pdf</a>                                                                                                                                                 |
| Stanislaus | 13-Jul-20 | <a href="https://www.stancoe.org/coronavirus">https://www.stancoe.org/coronavirus</a>                                                                                                                                                                                       |
| Stanislaus | 13-Jul-20 | <a href="https://www.latimes.com/california/story/2020-07-13/newsom-california-county-rollback-reopening-coronavirus">https://www.latimes.com/california/story/2020-07-13/newsom-california-county-rollback-reopening-coronavirus</a>                                       |
| Stanislaus | 17-Jul-20 | <a href="https://www.cdph.ca.gov/Programs/CID/DCDC/CDPH%20Document%20Library/COVID-19/Schools%20Reopening%20Recommendations.pdf">https://www.cdph.ca.gov/Programs/CID/DCDC/CDPH%20Document%20Library/COVID-19/Schools%20Reopening%20Recommendations.pdf</a>                 |
| Stanislaus | 28-Aug-20 | <a href="https://abc7news.com/ca-reopneing-phases-covid19cagov-gavin-newsom-update-california-salon-reopening/6393805/">https://abc7news.com/ca-reopneing-phases-covid19cagov-gavin-newsom-update-california-salon-reopening/6393805/</a>                                   |

|            |           |                                                                                                                                                                                                                                                                                                                                                                                                                                                                                                                                                                                       |
|------------|-----------|---------------------------------------------------------------------------------------------------------------------------------------------------------------------------------------------------------------------------------------------------------------------------------------------------------------------------------------------------------------------------------------------------------------------------------------------------------------------------------------------------------------------------------------------------------------------------------------|
| Stanislaus | 22-Sep-20 | <a href="https://files.covid19.ca.gov/pdf/guidance-expanded-personal-care-services--en.pdf">https://files.covid19.ca.gov/pdf/guidance-expanded-personal-care-services--en.pdf</a>                                                                                                                                                                                                                                                                                                                                                                                                     |
| Stanislaus | 9-Oct-20  | <a href="https://wp.sbcounty.gov/cao/countywire/?p=9160#:~:text=Private%20outdoor%20gatherings%20of%20three%20households%20now%20allowed%20throughout%20the%20county%2C%20state,-Published%20October%209&amp;text=Private%20outdoor%20gatherings%20of%20people,Gavin%20Newsom%20on%20Friday.">https://wp.sbcounty.gov/cao/countywire/?p=9160#:~:text=Private%20outdoor%20gatherings%20of%20three%20households%20now%20allowed%20throughout%20the%20county%2C%20state,-Published%20October%209&amp;text=Private%20outdoor%20gatherings%20of%20people,Gavin%20Newsom%20on%20Friday.</a> |
| Stanislaus | 13-Oct-20 | <a href="https://projects.sfchronicle.com/2020/coronavirus-map/california-reopening/">https://projects.sfchronicle.com/2020/coronavirus-map/california-reopening/</a>                                                                                                                                                                                                                                                                                                                                                                                                                 |
| Stanislaus | 13-Nov-20 | <a href="https://www.cdph.ca.gov/Programs/CID/DCDC/Pages/COVID-19/Guidance-for-the-Prevention-of-COVID-19-Transmission-for-Gatherings-November-2020.aspx">https://www.cdph.ca.gov/Programs/CID/DCDC/Pages/COVID-19/Guidance-for-the-Prevention-of-COVID-19-Transmission-for-Gatherings-November-2020.aspx</a>                                                                                                                                                                                                                                                                         |
| Stanislaus | 16-Nov-20 | <a href="https://www.cdph.ca.gov/Programs/CID/DCDC/Pages/COVID-19/guidance-for-face-coverings.aspx">https://www.cdph.ca.gov/Programs/CID/DCDC/Pages/COVID-19/guidance-for-face-coverings.aspx</a>                                                                                                                                                                                                                                                                                                                                                                                     |
| Stanislaus | 17-Nov-20 | <a href="http://schsa.org/pdf/press-releases/2020/20-38-purple-tier.pdf">http://schsa.org/pdf/press-releases/2020/20-38-purple-tier.pdf</a>                                                                                                                                                                                                                                                                                                                                                                                                                                           |
| Stanislaus | 19-Nov-20 | <a href="https://www.cdph.ca.gov/Programs/CID/DCDC/Pages/COVID-19/limited-stay-at-home-order.aspx">https://www.cdph.ca.gov/Programs/CID/DCDC/Pages/COVID-19/limited-stay-at-home-order.aspx</a>                                                                                                                                                                                                                                                                                                                                                                                       |
| Stanislaus | 5-Dec-20  | <a href="https://www.gov.ca.gov/wp-content/uploads/2020/12/12.3.20-Stay-at-Home-Order-ICU-Scenario.pdf">https://www.gov.ca.gov/wp-content/uploads/2020/12/12.3.20-Stay-at-Home-Order-ICU-Scenario.pdf</a>                                                                                                                                                                                                                                                                                                                                                                             |
| Sutter     | 10-Mar-20 | <a href="https://www.appeal-democrat.com/news/yuba-sutter-counties-declare-state-of-emergency/article_b74377e8-635a-11ea-851c-2b94d91fc87d.html">https://www.appeal-democrat.com/news/yuba-sutter-counties-declare-state-of-emergency/article_b74377e8-635a-11ea-851c-2b94d91fc87d.html</a>                                                                                                                                                                                                                                                                                           |
| Sutter     | 18-Mar-20 | <a href="https://sacramento.cbslocal.com/2020/03/18/coronavirus-yuba-sutter-counties-stay-home/">https://sacramento.cbslocal.com/2020/03/18/coronavirus-yuba-sutter-counties-stay-home/</a>                                                                                                                                                                                                                                                                                                                                                                                           |
| Sutter     | 19-Mar-20 | <a href="https://www.gov.ca.gov/wp-content/uploads/2020/03/3.19.20-attested-EO-N-33-20-COVID-19-HEALTH-ORDER.pdf">https://www.gov.ca.gov/wp-content/uploads/2020/03/3.19.20-attested-EO-N-33-20-COVID-19-HEALTH-ORDER.pdf</a>                                                                                                                                                                                                                                                                                                                                                         |
| Sutter     | 6-Apr-20  | <a href="https://www.suttercounty.org/assets/pdf/2020-04-06%20COVID-19%20PHO%20Order.pdf">https://www.suttercounty.org/assets/pdf/2020-04-06%20COVID-19%20PHO%20Order.pdf</a>                                                                                                                                                                                                                                                                                                                                                                                                         |
| Sutter     | 4-May-20  | <a href="https://www.yuba.org/COVID%2019%20-%20Face%20Covering%20Order%20-%20Yuba-Sutter%20-%20FINAL_signed.pdf">https://www.yuba.org/COVID%2019%20-%20Face%20Covering%20Order%20-%20Yuba-Sutter%20-%20FINAL_signed.pdf</a>                                                                                                                                                                                                                                                                                                                                                           |
| Sutter     | 4-May-20  | <a href="https://www.yuba.org/COVID%2019%20-%20Sutter%20Yuba%20Order%20-%205-4-2020%20-%20FINAL_signed.pdf">https://www.yuba.org/COVID%2019%20-%20Sutter%20Yuba%20Order%20-%205-4-2020%20-%20FINAL_signed.pdf</a>                                                                                                                                                                                                                                                                                                                                                                     |
| Sutter     | 29-May-20 | <a href="https://www.suttercounty.org/assets/pdf/coronavirus/COVID%2019%20-%20Amendment%2020-001%20to%20PHO%20Order.pdf">https://www.suttercounty.org/assets/pdf/coronavirus/COVID%2019%20-%20Amendment%2020-001%20to%20PHO%20Order.pdf</a>                                                                                                                                                                                                                                                                                                                                           |
| Sutter     | 11-Jun-20 | <a href="https://www.suttercounty.org/assets/pdf/coronavirus/2020-06-11_COVID-19_Amended_Order.pdf">https://www.suttercounty.org/assets/pdf/coronavirus/2020-06-11_COVID-19_Amended_Order.pdf</a>                                                                                                                                                                                                                                                                                                                                                                                     |
| Sutter     | 18-Jun-20 | <a href="https://www.cdph.ca.gov/Programs/CID/DCDC/CDPH%20Document%20Library/COVID-19/Guidance-for-Face-Coverings_06-18-2020.pdf">https://www.cdph.ca.gov/Programs/CID/DCDC/CDPH%20Document%20Library/COVID-19/Guidance-for-Face-Coverings_06-18-2020.pdf</a>                                                                                                                                                                                                                                                                                                                         |
| Sutter     | 10-Jul-20 | <a href="https://www.suttercounty.org/assets/pdf/coronavirus/2020-07-10%20COVID-19%20-%20Amendment%2020-004%20to%20PHO%20Order.pdf">https://www.suttercounty.org/assets/pdf/coronavirus/2020-07-10%20COVID-19%20-%20Amendment%2020-004%20to%20PHO%20Order.pdf</a>                                                                                                                                                                                                                                                                                                                     |
| Sutter     | 13-Jul-20 | <a href="https://covid19.ca.gov/roadmap-counties/">https://covid19.ca.gov/roadmap-counties/</a>                                                                                                                                                                                                                                                                                                                                                                                                                                                                                       |
| Sutter     | 13-Jul-20 | <a href="https://www.latimes.com/california/story/2020-07-13/newsom-california-county-rollback-reopening-coronavirus">https://www.latimes.com/california/story/2020-07-13/newsom-california-county-rollback-reopening-coronavirus</a>                                                                                                                                                                                                                                                                                                                                                 |
| Sutter     | 17-Jul-20 | <a href="https://www.cdph.ca.gov/Programs/CID/DCDC/CDPH%20Document%20Library/COVID-19/Schools%20Reopening%20Recommendations.pdf">https://www.cdph.ca.gov/Programs/CID/DCDC/CDPH%20Document%20Library/COVID-19/Schools%20Reopening%20Recommendations.pdf</a>                                                                                                                                                                                                                                                                                                                           |
| Sutter     | 28-Aug-20 | <a href="https://abc7news.com/ca-reopneing-phases-covid19cagov-gavin-newsom-update-california-salon-reopening/6393805/">https://abc7news.com/ca-reopneing-phases-covid19cagov-gavin-newsom-update-california-salon-reopening/6393805/</a>                                                                                                                                                                                                                                                                                                                                             |
| Sutter     | 22-Sep-20 | <a href="https://files.covid19.ca.gov/pdf/guidance-expanded-personal-care-services--en.pdf">https://files.covid19.ca.gov/pdf/guidance-expanded-personal-care-services--en.pdf</a>                                                                                                                                                                                                                                                                                                                                                                                                     |
| Sutter     | 6-Oct-20  | <a href="https://www.suttercounty.org/assets/pdf/coronavirus/2020-10-06%20Yuba-Sutter%20Order%20Terminating%20Prior%20Orders.pdf">https://www.suttercounty.org/assets/pdf/coronavirus/2020-10-06%20Yuba-Sutter%20Order%20Terminating%20Prior%20Orders.pdf</a>                                                                                                                                                                                                                                                                                                                         |
| Sutter     | 9-Oct-20  | <a href="https://wp.sbcounty.gov/cao/countywire/?p=9160#:~:text=Private%20outdoor%20gatherings%20of%20three%20households%20now%20allowed%20throughout%20the%20county%2C%20state,-Published%20October%209&amp;text=Private%20outdoor%20gatherings%20of%20people,Gavin%20Newsom%20on%20Friday.">https://wp.sbcounty.gov/cao/countywire/?p=9160#:~:text=Private%20outdoor%20gatherings%20of%20three%20households%20now%20allowed%20throughout%20the%20county%2C%20state,-Published%20October%209&amp;text=Private%20outdoor%20gatherings%20of%20people,Gavin%20Newsom%20on%20Friday.</a> |
| Sutter     | 13-Oct-20 | <a href="https://projects.sfchronicle.com/2020/coronavirus-map/california-reopening/">https://projects.sfchronicle.com/2020/coronavirus-map/california-reopening/</a>                                                                                                                                                                                                                                                                                                                                                                                                                 |
| Sutter     | 13-Nov-20 | <a href="https://www.cdph.ca.gov/Programs/CID/DCDC/Pages/COVID-19/Guidance-for-the-Prevention-of-COVID-19-Transmission-for-Gatherings-November-2020.aspx">https://www.cdph.ca.gov/Programs/CID/DCDC/Pages/COVID-19/Guidance-for-the-Prevention-of-COVID-19-Transmission-for-Gatherings-November-2020.aspx</a>                                                                                                                                                                                                                                                                         |

|         |           |                                                                                                                                                                                                                                                                                                                                                                                                                                                                                                                                                                                       |
|---------|-----------|---------------------------------------------------------------------------------------------------------------------------------------------------------------------------------------------------------------------------------------------------------------------------------------------------------------------------------------------------------------------------------------------------------------------------------------------------------------------------------------------------------------------------------------------------------------------------------------|
| Sutter  | 16-Nov-20 | <a href="https://www.cdph.ca.gov/Programs/CID/DCDC/Pages/COVID-19/guidance-for-face-coverings.aspx">https://www.cdph.ca.gov/Programs/CID/DCDC/Pages/COVID-19/guidance-for-face-coverings.aspx</a>                                                                                                                                                                                                                                                                                                                                                                                     |
| Sutter  | 17-Nov-20 | <a href="https://kmpb.com/news/local/40-california-counties-in-purple-tier-including-the-central-valley">https://kmpb.com/news/local/40-california-counties-in-purple-tier-including-the-central-valley</a>                                                                                                                                                                                                                                                                                                                                                                           |
| Sutter  | 19-Nov-20 | <a href="https://www.cdph.ca.gov/Programs/CID/DCDC/Pages/COVID-19/limited-stay-at-home-order.aspx">https://www.cdph.ca.gov/Programs/CID/DCDC/Pages/COVID-19/limited-stay-at-home-order.aspx</a>                                                                                                                                                                                                                                                                                                                                                                                       |
| Sutter  | 5-Dec-20  | <a href="https://www.suttercounty.org/assets/pdf/coronavirus/2020-12-04%20Public%20Health%20Advisory%20to%20Mitigate%20Risks%20in%20Yuba-Sutter.pdf">https://www.suttercounty.org/assets/pdf/coronavirus/2020-12-04%20Public%20Health%20Advisory%20to%20Mitigate%20Risks%20in%20Yuba-Sutter.pdf</a>                                                                                                                                                                                                                                                                                   |
| Sutter  | 9-Dec-20  | <a href="https://www.gov.ca.gov/wp-content/uploads/2020/12/12.3.20-Stay-at-Home-Order-ICU-Scenario.pdf">https://www.gov.ca.gov/wp-content/uploads/2020/12/12.3.20-Stay-at-Home-Order-ICU-Scenario.pdf</a>                                                                                                                                                                                                                                                                                                                                                                             |
| Tehama  | 17-Mar-20 | <a href="https://www.redbluffdailynews.com/2020/03/17/tehama-county-public-health-officer-delivers-coronavirus-update/">https://www.redbluffdailynews.com/2020/03/17/tehama-county-public-health-officer-delivers-coronavirus-update/</a>                                                                                                                                                                                                                                                                                                                                             |
| Tehama  | 19-Mar-20 | <a href="https://www.gov.ca.gov/wp-content/uploads/2020/03/3.19.20-attested-EO-N-33-20-COVID-19-HEALTH-ORDER.pdf">https://www.gov.ca.gov/wp-content/uploads/2020/03/3.19.20-attested-EO-N-33-20-COVID-19-HEALTH-ORDER.pdf</a>                                                                                                                                                                                                                                                                                                                                                         |
| Tehama  | 20-Mar-20 | <a href="https://www.tehamacohealthservices.net/order-of-the-tehama-county-health-officer/">https://www.tehamacohealthservices.net/order-of-the-tehama-county-health-officer/</a>                                                                                                                                                                                                                                                                                                                                                                                                     |
| Tehama  | 7-May-20  | <a href="https://www.cdph.ca.gov/Programs/CID/DCDC/CDPH%20Document%20Library/COVID-19/SHO%20Order%205-7-2020.pdf">https://www.cdph.ca.gov/Programs/CID/DCDC/CDPH%20Document%20Library/COVID-19/SHO%20Order%205-7-2020.pdf</a>                                                                                                                                                                                                                                                                                                                                                         |
| Tehama  | 13-May-20 | <a href="https://www.redbluffdailynews.com/2020/05/13/tehama-county-plan-approved-to-move-into-stage-2-reopening-amidst-covid-19-pandemic/">https://www.redbluffdailynews.com/2020/05/13/tehama-county-plan-approved-to-move-into-stage-2-reopening-amidst-covid-19-pandemic/</a>                                                                                                                                                                                                                                                                                                     |
| Tehama  | 26-May-20 | <a href="https://www.vcstar.com/story/news/2020/05/26/coronavirus-california-approves-reopening-barbershops-hair-salons/5261851002/">https://www.vcstar.com/story/news/2020/05/26/coronavirus-california-approves-reopening-barbershops-hair-salons/5261851002/</a>                                                                                                                                                                                                                                                                                                                   |
| Tehama  | 11-Jun-20 | <a href="https://ktla.com/news/california/california-reopens-to-tourists-but-with-changes-to-hotels-zoos-and-more/#:~:text=The%20state%20is%20giving%20the,Gov.&amp;text=Newsom%20issued%20a%20stay%20at%20home%20order,stores%20and%20restaurants%20to%20reopen.">https://ktla.com/news/california/california-reopens-to-tourists-but-with-changes-to-hotels-zoos-and-more/#:~:text=The%20state%20is%20giving%20the,Gov.&amp;text=Newsom%20issued%20a%20stay%20at%20home%20order,stores%20and%20restaurants%20to%20reopen.</a>                                                       |
| Tehama  | 18-Jun-20 | <a href="https://www.cdph.ca.gov/Programs/CID/DCDC/CDPH%20Document%20Library/COVID-19/Guidance-for-Face-Coverings_06-18-2020.pdf">https://www.cdph.ca.gov/Programs/CID/DCDC/CDPH%20Document%20Library/COVID-19/Guidance-for-Face-Coverings_06-18-2020.pdf</a>                                                                                                                                                                                                                                                                                                                         |
| Tehama  | 19-Jun-20 | <a href="https://www.sfchronicle.com/health/article/When-will-nail-salons-tattoo-parlors-reopen-in-15337063.php">https://www.sfchronicle.com/health/article/When-will-nail-salons-tattoo-parlors-reopen-in-15337063.php</a>                                                                                                                                                                                                                                                                                                                                                           |
| Tehama  | 13-Jul-20 | <a href="https://www.latimes.com/california/story/2020-07-13/newsom-california-county-rollback-reopening-coronavirus">https://www.latimes.com/california/story/2020-07-13/newsom-california-county-rollback-reopening-coronavirus</a>                                                                                                                                                                                                                                                                                                                                                 |
| Tehama  | 26-Aug-20 | <a href="https://www.appeal-democrat.com/corning_observer/tehama-county-moved-to-state-covid-19-monitoring-list/article_7271b0de-e727-11ea-b53d-73aaec3af907.html">https://www.appeal-democrat.com/corning_observer/tehama-county-moved-to-state-covid-19-monitoring-list/article_7271b0de-e727-11ea-b53d-73aaec3af907.html</a>                                                                                                                                                                                                                                                       |
| Tehama  | 28-Aug-20 | <a href="https://abc7news.com/ca-reopneing-phases-covid19cagov-gavin-newsom-update-california-salon-reopening/6393805/">https://abc7news.com/ca-reopneing-phases-covid19cagov-gavin-newsom-update-california-salon-reopening/6393805/</a>                                                                                                                                                                                                                                                                                                                                             |
| Tehama  | 15-Sep-20 | <a href="https://projects.sfchronicle.com/2020/coronavirus-map/california-reopening/">https://projects.sfchronicle.com/2020/coronavirus-map/california-reopening/</a>                                                                                                                                                                                                                                                                                                                                                                                                                 |
| Tehama  | 6-Oct-20  | <a href="https://www.actionnewsnow.com/content/news/Tehama-County-moved-back-to-purple-tier-after-spike-in-COVID-19-cases--572669461.html">https://www.actionnewsnow.com/content/news/Tehama-County-moved-back-to-purple-tier-after-spike-in-COVID-19-cases--572669461.html</a>                                                                                                                                                                                                                                                                                                       |
| Tehama  | 9-Oct-20  | <a href="https://wp.sbcounty.gov/cao/countywire/?p=9160#:~:text=Private%20outdoor%20gatherings%20of%20three%20households%20now%20allowed%20throughout%20the%20county%2C%20state,-Published%20October%209&amp;text=Private%20outdoor%20gatherings%20of%20people,Gavin%20Newsom%20on%20Friday.">https://wp.sbcounty.gov/cao/countywire/?p=9160#:~:text=Private%20outdoor%20gatherings%20of%20three%20households%20now%20allowed%20throughout%20the%20county%2C%20state,-Published%20October%209&amp;text=Private%20outdoor%20gatherings%20of%20people,Gavin%20Newsom%20on%20Friday.</a> |
| Tehama  | 16-Nov-20 | <a href="https://www.cdph.ca.gov/Programs/CID/DCDC/Pages/COVID-19/guidance-for-face-coverings.aspx">https://www.cdph.ca.gov/Programs/CID/DCDC/Pages/COVID-19/guidance-for-face-coverings.aspx</a>                                                                                                                                                                                                                                                                                                                                                                                     |
| Tehama  | 19-Nov-20 | <a href="https://www.cdph.ca.gov/Programs/CID/DCDC/Pages/COVID-19/limited-stay-at-home-order.aspx">https://www.cdph.ca.gov/Programs/CID/DCDC/Pages/COVID-19/limited-stay-at-home-order.aspx</a>                                                                                                                                                                                                                                                                                                                                                                                       |
| Trinity | 13-Mar-20 | <a href="https://www.trinitycounty.org/sites/default/files/Public_Health/Documents/Covid/Trinity%20County%20COVID-19%20Press%20Release%203-213-2020.pdf">https://www.trinitycounty.org/sites/default/files/Public_Health/Documents/Covid/Trinity%20County%20COVID-19%20Press%20Release%203-213-2020.pdf</a>                                                                                                                                                                                                                                                                           |
| Trinity | 16-Mar-20 | <a href="https://www.trinitycounty.org/sites/default/files/Public_Health/Documents/Covid/COVID-19_Press_Release_3-16-2020.pdf">https://www.trinitycounty.org/sites/default/files/Public_Health/Documents/Covid/COVID-19_Press_Release_3-16-2020.pdf</a>                                                                                                                                                                                                                                                                                                                               |
| Trinity | 19-Mar-20 | <a href="http://www.trinityjournal.com/news/article_5d64e9a4-6e2d-11ea-998a-1fcc69c3ab9d.html#:~:text=Gavin%20Newsom%20and%20a%20March,testing%20positive%20for%20the%20illness.">http://www.trinityjournal.com/news/article_5d64e9a4-6e2d-11ea-998a-1fcc69c3ab9d.html#:~:text=Gavin%20Newsom%20and%20a%20March,testing%20positive%20for%20the%20illness.</a>                                                                                                                                                                                                                         |
| Trinity | 19-Mar-20 | <a href="https://www.gov.ca.gov/wp-content/uploads/2020/03/3.19.20-attested-EO-N-33-20-COVID-19-HEALTH-ORDER.pdf">https://www.gov.ca.gov/wp-content/uploads/2020/03/3.19.20-attested-EO-N-33-20-COVID-19-HEALTH-ORDER.pdf</a>                                                                                                                                                                                                                                                                                                                                                         |
| Trinity | 20-Mar-20 | <a href="https://www.trinitycounty.org/sites/default/files/Public_Health/Documents/Covid/Press_release_3.20.20.pdf">https://www.trinitycounty.org/sites/default/files/Public_Health/Documents/Covid/Press_release_3.20.20.pdf</a>                                                                                                                                                                                                                                                                                                                                                     |
| Trinity | 25-Mar-20 | <a href="https://www.trinitycounty.org/sites/default/files/Public_Health/Documents/Covid/Health_Officer_order_final_3.25.20_signed.pdf">https://www.trinitycounty.org/sites/default/files/Public_Health/Documents/Covid/Health_Officer_order_final_3.25.20_signed.pdf</a>                                                                                                                                                                                                                                                                                                             |



|         |           |                                                                                                                                                                                                                                                                                                                                                                                                                                                                                                                                                                                       |
|---------|-----------|---------------------------------------------------------------------------------------------------------------------------------------------------------------------------------------------------------------------------------------------------------------------------------------------------------------------------------------------------------------------------------------------------------------------------------------------------------------------------------------------------------------------------------------------------------------------------------------|
| Trinity | 30-Mar-20 | <a href="https://www.trinitycounty.org/sites/default/files/Public_Health/Documents/Covid/Health_Order_Amendment_3.30.20.pdf">https://www.trinitycounty.org/sites/default/files/Public_Health/Documents/Covid/Health_Order_Amendment_3.30.20.pdf</a>                                                                                                                                                                                                                                                                                                                                   |
| Trinity | 6-Apr-20  | <a href="https://www.trinitycounty.org/sites/default/files/Public_Health/Documents/Covid/PHB_Press_Release_4-6-2020.pdf">https://www.trinitycounty.org/sites/default/files/Public_Health/Documents/Covid/PHB_Press_Release_4-6-2020.pdf</a>                                                                                                                                                                                                                                                                                                                                           |
| Trinity | 7-May-20  | <a href="https://www.cdph.ca.gov/Programs/CID/DCDC/CDPH%20Document%20Library/COVID-19/SHO%20Order%205-7-2020.pdf">https://www.cdph.ca.gov/Programs/CID/DCDC/CDPH%20Document%20Library/COVID-19/SHO%20Order%205-7-2020.pdf</a>                                                                                                                                                                                                                                                                                                                                                         |
| Trinity | 11-May-20 | <a href="https://www.trinitycounty.org/sites/default/files/Public_Health/Documents/Covid/Trinity%20County%20Press%20Release%205.11.20_.pdf">https://www.trinitycounty.org/sites/default/files/Public_Health/Documents/Covid/Trinity%20County%20Press%20Release%205.11.20_.pdf</a>                                                                                                                                                                                                                                                                                                     |
| Trinity | 18-May-20 | <a href="https://www.trinitycounty.org/sites/default/files/Public_Health/Documents/Covid/PSA_5.18.20.pdf">https://www.trinitycounty.org/sites/default/files/Public_Health/Documents/Covid/PSA_5.18.20.pdf</a>                                                                                                                                                                                                                                                                                                                                                                         |
| Trinity | 22-May-20 | <a href="https://www.trinitycounty.org/sites/default/files/Public_Health/Documents/Covid/Health_Order_Amendment_5.22.2020.pdf">https://www.trinitycounty.org/sites/default/files/Public_Health/Documents/Covid/Health_Order_Amendment_5.22.2020.pdf</a>                                                                                                                                                                                                                                                                                                                               |
| Trinity | 22-May-20 | <a href="https://www.trinitycounty.org/sites/default/files/Public_Health/Documents/Covid/Press_Release_5.22.2020.pdf">https://www.trinitycounty.org/sites/default/files/Public_Health/Documents/Covid/Press_Release_5.22.2020.pdf</a>                                                                                                                                                                                                                                                                                                                                                 |
| Trinity | 26-May-20 | <a href="https://www.trinitycounty.org/sites/default/files/Press%20Release%205.26.2020.pdf">https://www.trinitycounty.org/sites/default/files/Press%20Release%205.26.2020.pdf</a>                                                                                                                                                                                                                                                                                                                                                                                                     |
| Trinity | 28-May-20 | <a href="https://www.trinitycounty.org/sites/default/files/Public_Health/Documents/Covid/Press_Release_5.28.2020.pdf">https://www.trinitycounty.org/sites/default/files/Public_Health/Documents/Covid/Press_Release_5.28.2020.pdf</a>                                                                                                                                                                                                                                                                                                                                                 |
| Trinity | 5-Jun-20  | <a href="https://www.trinitycounty.org/sites/default/files/Public_Health/Documents/Covid/Press_Release_6.09.20_and_Associated_Containment_Plan.pdf">https://www.trinitycounty.org/sites/default/files/Public_Health/Documents/Covid/Press_Release_6.09.20_and_Associated_Containment_Plan.pdf</a>                                                                                                                                                                                                                                                                                     |
| Trinity | 18-Jun-20 | <a href="https://www.cdph.ca.gov/Programs/CID/DCDC/CDPH%20Document%20Library/COVID-19/Guidance-for-Face-Coverings_06-18-2020.pdf">https://www.cdph.ca.gov/Programs/CID/DCDC/CDPH%20Document%20Library/COVID-19/Guidance-for-Face-Coverings_06-18-2020.pdf</a>                                                                                                                                                                                                                                                                                                                         |
| Trinity | 18-Jun-20 | <a href="https://www.trinitycounty.org/sites/default/files/Public_Health/Documents/Covid/Press_Release_6.18.20_Expanded_Business.pdf">https://www.trinitycounty.org/sites/default/files/Public_Health/Documents/Covid/Press_Release_6.18.20_Expanded_Business.pdf</a>                                                                                                                                                                                                                                                                                                                 |
| Trinity | 13-Jul-20 | <a href="https://www.latimes.com/california/story/2020-07-13/newsom-california-county-rollback-reopening-coronavirus">https://www.latimes.com/california/story/2020-07-13/newsom-california-county-rollback-reopening-coronavirus</a>                                                                                                                                                                                                                                                                                                                                                 |
| Trinity | 28-Aug-20 | <a href="https://projects.sfchronicle.com/2020/coronavirus-map/california-reopening/">https://projects.sfchronicle.com/2020/coronavirus-map/california-reopening/</a>                                                                                                                                                                                                                                                                                                                                                                                                                 |
| Trinity | 6-Oct-20  | <a href="https://krctv.com/north-coast-news/eureka-local-news/humboldt-county-to-move-to-yellow-least-restrictive-covid-19-reopening-tier">https://krctv.com/north-coast-news/eureka-local-news/humboldt-county-to-move-to-yellow-least-restrictive-covid-19-reopening-tier</a>                                                                                                                                                                                                                                                                                                       |
| Trinity | 9-Oct-20  | <a href="https://wp.sbcounty.gov/cao/countywire/?p=9160#:~:text=Private%20outdoor%20gatherings%20of%20three%20households%20now%20allowed%20throughout%20the%20county%2C%20state,-Published%20October%209&amp;text=Private%20outdoor%20gatherings%20of%20people,Gavin%20Newsom%20on%20Friday.">https://wp.sbcounty.gov/cao/countywire/?p=9160#:~:text=Private%20outdoor%20gatherings%20of%20three%20households%20now%20allowed%20throughout%20the%20county%2C%20state,-Published%20October%209&amp;text=Private%20outdoor%20gatherings%20of%20people,Gavin%20Newsom%20on%20Friday.</a> |
| Trinity | 10-Nov-20 | <a href="https://www.latimes.com/california/story/2020-11-10/california-coronavirus-cases-climb-more-counties-expected-stricter-reopenings">https://www.latimes.com/california/story/2020-11-10/california-coronavirus-cases-climb-more-counties-expected-stricter-reopenings</a>                                                                                                                                                                                                                                                                                                     |
| Trinity | 13-Nov-20 | <a href="https://www.cdph.ca.gov/Programs/CID/DCDC/Pages/COVID-19/Guidance-for-the-Prevention-of-COVID-19-Transmission-for-Gatherings-November-2020.aspx">https://www.cdph.ca.gov/Programs/CID/DCDC/Pages/COVID-19/Guidance-for-the-Prevention-of-COVID-19-Transmission-for-Gatherings-November-2020.aspx</a>                                                                                                                                                                                                                                                                         |
| Trinity | 16-Nov-20 | <a href="https://www.cdph.ca.gov/Programs/CID/DCDC/Pages/COVID-19/guidance-for-face-coverings.aspx">https://www.cdph.ca.gov/Programs/CID/DCDC/Pages/COVID-19/guidance-for-face-coverings.aspx</a>                                                                                                                                                                                                                                                                                                                                                                                     |
| Trinity | 17-Nov-20 | <a href="https://kmph.com/news/local/40-california-counties-in-purple-tier-including-the-central-valley">https://kmph.com/news/local/40-california-counties-in-purple-tier-including-the-central-valley</a>                                                                                                                                                                                                                                                                                                                                                                           |
| Trinity | 19-Nov-20 | <a href="https://www.cdph.ca.gov/Programs/CID/DCDC/Pages/COVID-19/limited-stay-at-home-order.aspx">https://www.cdph.ca.gov/Programs/CID/DCDC/Pages/COVID-19/limited-stay-at-home-order.aspx</a>                                                                                                                                                                                                                                                                                                                                                                                       |
| Tulare  | 11-Mar-20 | <a href="https://www.yourcentralvalley.com/life-health/health/coronavirus/first-confirmed-novel-coronavirus-case-in-tulare-county-triggers-emergency-declaration/">https://www.yourcentralvalley.com/life-health/health/coronavirus/first-confirmed-novel-coronavirus-case-in-tulare-county-triggers-emergency-declaration/</a>                                                                                                                                                                                                                                                       |
| Tulare  | 11-Mar-20 | <a href="http://hhsawebdocs.tchhsa.org/File.ashx?id=5279">http://hhsawebdocs.tchhsa.org/File.ashx?id=5279</a>                                                                                                                                                                                                                                                                                                                                                                                                                                                                         |
| Tulare  | 18-Mar-20 | <a href="https://tchhsa.org/eng/index.cfm/public-health/covid-19-in-tulare-county/covid-19-news-releases1/march-18-2020-news-release-tulare-county-positive-covid-19-cases-rise-to-five/">https://tchhsa.org/eng/index.cfm/public-health/covid-19-in-tulare-county/covid-19-news-releases1/march-18-2020-news-release-tulare-county-positive-covid-19-cases-rise-to-five/</a>                                                                                                                                                                                                         |
| Tulare  | 19-Mar-20 | <a href="https://tchhsa.org/eng/index.cfm/public-health/covid-19-in-tulare-county/covid-19-news-releases1/march-19-2020-news-release-two-new-cases-of-covid-19-in-tulare-county/">https://tchhsa.org/eng/index.cfm/public-health/covid-19-in-tulare-county/covid-19-news-releases1/march-19-2020-news-release-two-new-cases-of-covid-19-in-tulare-county/</a>                                                                                                                                                                                                                         |
| Tulare  | 19-Mar-20 | <a href="https://www.gov.ca.gov/wp-content/uploads/2020/03/3.19.20-attested-EO-N-33-20-COVID-19-HEALTH-ORDER.pdf">https://www.gov.ca.gov/wp-content/uploads/2020/03/3.19.20-attested-EO-N-33-20-COVID-19-HEALTH-ORDER.pdf</a>                                                                                                                                                                                                                                                                                                                                                         |
| Tulare  | 19-Mar-20 | <a href="https://tularecounty.ca.gov/county/index.cfm?LinkServID=1FE0A10B-5056-A959-DBBF853E226EB2C4">https://tularecounty.ca.gov/county/index.cfm?LinkServID=1FE0A10B-5056-A959-DBBF853E226EB2C4</a>                                                                                                                                                                                                                                                                                                                                                                                 |
| Tulare  | 20-Mar-20 | <a href="https://tchhsa.org/eng/index.cfm/public-health/covid-19-in-tulare-county/covid-19-news-releases1/march-20-2020-news-release-four-new-cases-of-covid-19-in-tulare-county/">https://tchhsa.org/eng/index.cfm/public-health/covid-19-in-tulare-county/covid-19-news-releases1/march-20-2020-news-release-four-new-cases-of-covid-19-in-tulare-county/</a>                                                                                                                                                                                                                       |

|           |           |                                                                                                                                                                                                                                                                                                                                                                                                                                                                                                                                                                                       |
|-----------|-----------|---------------------------------------------------------------------------------------------------------------------------------------------------------------------------------------------------------------------------------------------------------------------------------------------------------------------------------------------------------------------------------------------------------------------------------------------------------------------------------------------------------------------------------------------------------------------------------------|
| Tulare    | 4-Apr-20  | <a href="https://tchhsa.org/eng/index.cfm/public-health/covid-19-in-tulare-county/covid-19-news-releases1/april-4-2020-news-release-tulare-county-public-health-branch-reveals-community-spread-of-covid-19-present-in-tulare-county/">https://tchhsa.org/eng/index.cfm/public-health/covid-19-in-tulare-county/covid-19-news-releases1/april-4-2020-news-release-tulare-county-public-health-branch-reveals-community-spread-of-covid-19-present-in-tulare-county/</a>                                                                                                               |
| Tulare    | 8-Apr-20  | <a href="https://tchhsa.org/eng/index.cfm/public-health/covid-19-in-tulare-county/covid-19-news-releases1/april-8-2020-news-release-tulare-county-parks-will-be-closed-for-easter-weekend-to-slow-the-spread-of-covid-19/">https://tchhsa.org/eng/index.cfm/public-health/covid-19-in-tulare-county/covid-19-news-releases1/april-8-2020-news-release-tulare-county-parks-will-be-closed-for-easter-weekend-to-slow-the-spread-of-covid-19/</a>                                                                                                                                       |
| Tulare    | 8-Apr-20  | <a href="https://tularecounty.ca.gov/county/index.cfm?LinkServID=CB0646D8-5056-BBFD-60AF9519B4F8F881">https://tularecounty.ca.gov/county/index.cfm?LinkServID=CB0646D8-5056-BBFD-60AF9519B4F8F881</a>                                                                                                                                                                                                                                                                                                                                                                                 |
| Tulare    | 8-May-20  | <a href="https://tchhsa.org/eng/index.cfm/public-health/covid-19-in-tulare-county/covid-19-news-releases1/may-8-2020-news-release-county-health-officer-releases-amended-emergency-order-for-the-prevention-of-covid-19-transmission/">https://tchhsa.org/eng/index.cfm/public-health/covid-19-in-tulare-county/covid-19-news-releases1/may-8-2020-news-release-county-health-officer-releases-amended-emergency-order-for-the-prevention-of-covid-19-transmission/</a>                                                                                                               |
| Tulare    | 8-May-20  | <a href="https://tchhsa.org/eng/index.cfm/public-health/covid-19-in-tulare-county/covid-19-news-releases1/may-8-2020-news-release-health-officer-recommends-face-coverings-for-the-public-and-essential-workers/">https://tchhsa.org/eng/index.cfm/public-health/covid-19-in-tulare-county/covid-19-news-releases1/may-8-2020-news-release-health-officer-recommends-face-coverings-for-the-public-and-essential-workers/</a>                                                                                                                                                         |
| Tulare    | 14-May-20 | <a href="https://tchhsa.org/eng/index.cfm/public-health/covid-19-in-tulare-county/covid-19-news-releases1/may-14-2020-news-release-county-officials-urge-tulare-county-residents-to-get-tested-for-covid-19/">https://tchhsa.org/eng/index.cfm/public-health/covid-19-in-tulare-county/covid-19-news-releases1/may-14-2020-news-release-county-officials-urge-tulare-county-residents-to-get-tested-for-covid-19/</a>                                                                                                                                                                 |
| Tulare    | 18-May-20 | <a href="https://covid19.tularecounty.ca.gov/tulare-county-emergency-order-for-prevention-of-covid19-transmission/tulare-county-public-health-emergency-order-for-the-prevention-of-novel-coronavirus-covid-19-transmission-may-18-2020/">https://covid19.tularecounty.ca.gov/tulare-county-emergency-order-for-prevention-of-covid19-transmission/tulare-county-public-health-emergency-order-for-the-prevention-of-novel-coronavirus-covid-19-transmission-may-18-2020/</a>                                                                                                         |
| Tulare    | 21-May-20 | <a href="https://tchhsa.org/eng/index.cfm/public-health/covid-19-in-tulare-county/covid-19-news-releases1/may-21-2020-news-release-tulare-county-public-health-issues-advisory-to-reduce-the-risk-of-contracting-covid-19/">https://tchhsa.org/eng/index.cfm/public-health/covid-19-in-tulare-county/covid-19-news-releases1/may-21-2020-news-release-tulare-county-public-health-issues-advisory-to-reduce-the-risk-of-contracting-covid-19/</a>                                                                                                                                     |
| Tulare    | 27-May-20 | <a href="https://tchhsa.org/eng/index.cfm/public-health/covid-19-in-tulare-county/covid-19-news-releases1/may-27-2020-news-release-tulare-county-receives-local-variance-approval-from-state-department-of-public-health/">https://tchhsa.org/eng/index.cfm/public-health/covid-19-in-tulare-county/covid-19-news-releases1/may-27-2020-news-release-tulare-county-receives-local-variance-approval-from-state-department-of-public-health/</a>                                                                                                                                       |
| Tulare    | 5-Jun-20  | <a href="https://tchhsa.org/eng/index.cfm/public-health/covid-19-in-tulare-county/covid-19-news-releases1/june-5-2020-news-release-state-releases-new-guidance-for-businesses-and-industry-to-reopen-effective-june-12/">https://tchhsa.org/eng/index.cfm/public-health/covid-19-in-tulare-county/covid-19-news-releases1/june-5-2020-news-release-state-releases-new-guidance-for-businesses-and-industry-to-reopen-effective-june-12/</a>                                                                                                                                           |
| Tulare    | 12-Jun-20 | <a href="https://tchhsa.org/eng/index.cfm/public-health/covid-19-in-tulare-county/covid-19-news-releases1/june-12-2020-news-release-state-releases-new-guidance-for-personal-care-services-nail-salons-and-others-to-reopen-effective-june-19/">https://tchhsa.org/eng/index.cfm/public-health/covid-19-in-tulare-county/covid-19-news-releases1/june-12-2020-news-release-state-releases-new-guidance-for-personal-care-services-nail-salons-and-others-to-reopen-effective-june-19/</a>                                                                                             |
| Tulare    | 18-Jun-20 | <a href="https://www.cdph.ca.gov/Programs/CID/DCDC/CDPH%20Document%20Library/COVID-19/Guidance-for-Face-Coverings_06-18-2020.pdf">https://www.cdph.ca.gov/Programs/CID/DCDC/CDPH%20Document%20Library/COVID-19/Guidance-for-Face-Coverings_06-18-2020.pdf</a>                                                                                                                                                                                                                                                                                                                         |
| Tulare    | 28-Jun-20 | <a href="https://www.latimes.com/california/story/2020-06-28/gavin-newsom-orders-bars-closed-in-7-california-counties-due-to-coronavirus-spread">https://www.latimes.com/california/story/2020-06-28/gavin-newsom-orders-bars-closed-in-7-california-counties-due-to-coronavirus-spread</a>                                                                                                                                                                                                                                                                                           |
| Tulare    | 1-Jul-20  | <a href="https://covid19.tularecounty.ca.gov/tulare-county-emergency-order-for-prevention-of-covid19-transmission/public-health-officer-order-for-tulare-county-closing-bars-pubs-brewpubs-and-breweries-effective-july-1-2020/">https://covid19.tularecounty.ca.gov/tulare-county-emergency-order-for-prevention-of-covid19-transmission/public-health-officer-order-for-tulare-county-closing-bars-pubs-brewpubs-and-breweries-effective-july-1-2020/</a>                                                                                                                           |
| Tulare    | 13-Jul-20 | <a href="https://tchhsa.org/eng/index.cfm/public-health/covid-19-in-tulare-county/covid-19-news-releases1/july-13-2020-news-release-state-officials-announce-closure-of-indoor-business-operations-due-to-covid-19/">https://tchhsa.org/eng/index.cfm/public-health/covid-19-in-tulare-county/covid-19-news-releases1/july-13-2020-news-release-state-officials-announce-closure-of-indoor-business-operations-due-to-covid-19/</a>                                                                                                                                                   |
| Tulare    | 13-Jul-20 | <a href="https://www.latimes.com/california/story/2020-07-13/newsom-california-county-rollback-reopening-coronavirus">https://www.latimes.com/california/story/2020-07-13/newsom-california-county-rollback-reopening-coronavirus</a>                                                                                                                                                                                                                                                                                                                                                 |
| Tulare    | 17-Jul-20 | <a href="https://tchhsa.org/eng/index.cfm/public-health/covid-19-in-tulare-county/covid-19-news-releases1/july-17-2020-news-release-tulare-county-schools-required-to-remain-closed-and-implement-distance-learning-due-to-covid-19/">https://tchhsa.org/eng/index.cfm/public-health/covid-19-in-tulare-county/covid-19-news-releases1/july-17-2020-news-release-tulare-county-schools-required-to-remain-closed-and-implement-distance-learning-due-to-covid-19/</a>                                                                                                                 |
| Tulare    | 28-Aug-20 | <a href="https://abc7news.com/ca-reopneing-phases-covid19cagov-gavin-newsom-update-california-salon-reopening/6393805/">https://abc7news.com/ca-reopneing-phases-covid19cagov-gavin-newsom-update-california-salon-reopening/6393805/</a>                                                                                                                                                                                                                                                                                                                                             |
| Tulare    | 22-Sep-20 | <a href="https://files.covid19.ca.gov/pdf/guidance-expanded-personal-care-services--en.pdf">https://files.covid19.ca.gov/pdf/guidance-expanded-personal-care-services--en.pdf</a>                                                                                                                                                                                                                                                                                                                                                                                                     |
| Tulare    | 9-Oct-20  | <a href="https://wp.sbcounty.gov/cao/countywire/?p=9160#:~:text=Private%20outdoor%20gatherings%20of%20three%20households%20now%20allowed%20throughout%20the%20county%2C%20state,-Published%20October%209&amp;text=Private%20outdoor%20gatherings%20of%20people,Gavin%20Newsom%20on%20Friday.">https://wp.sbcounty.gov/cao/countywire/?p=9160#:~:text=Private%20outdoor%20gatherings%20of%20three%20households%20now%20allowed%20throughout%20the%20county%2C%20state,-Published%20October%209&amp;text=Private%20outdoor%20gatherings%20of%20people,Gavin%20Newsom%20on%20Friday.</a> |
| Tulare    | 16-Nov-20 | <a href="https://www.cdph.ca.gov/Programs/CID/DCDC/Pages/COVID-19/guidance-for-face-coverings.aspx">https://www.cdph.ca.gov/Programs/CID/DCDC/Pages/COVID-19/guidance-for-face-coverings.aspx</a>                                                                                                                                                                                                                                                                                                                                                                                     |
| Tulare    | 19-Nov-20 | <a href="https://www.cdph.ca.gov/Programs/CID/DCDC/Pages/COVID-19/limited-stay-at-home-order.aspx">https://www.cdph.ca.gov/Programs/CID/DCDC/Pages/COVID-19/limited-stay-at-home-order.aspx</a>                                                                                                                                                                                                                                                                                                                                                                                       |
| Tulare    | 5-Dec-20  | <a href="https://www.gov.ca.gov/wp-content/uploads/2020/12/12.3.20-Stay-at-Home-Order-ICU-Scenario.pdf">https://www.gov.ca.gov/wp-content/uploads/2020/12/12.3.20-Stay-at-Home-Order-ICU-Scenario.pdf</a>                                                                                                                                                                                                                                                                                                                                                                             |
| Tuolumn e | 13-Mar-20 | <a href="https://www.tuolumnecounty.ca.gov/DocumentCenter/View/14451/COVID-19-Local-Health-Emergency---Order?bidId=">https://www.tuolumnecounty.ca.gov/DocumentCenter/View/14451/COVID-19-Local-Health-Emergency---Order?bidId=</a>                                                                                                                                                                                                                                                                                                                                                   |
| Tuolumn e | 13-Mar-20 | <a href="https://www.tuolumnecounty.ca.gov/DocumentCenter/View/14118/COVID-19-Local-Health-Emergency---Declaration?bidId=">https://www.tuolumnecounty.ca.gov/DocumentCenter/View/14118/COVID-19-Local-Health-Emergency---Declaration?bidId=</a>                                                                                                                                                                                                                                                                                                                                       |
| Tuolumn e | 17-Mar-20 | <a href="https://www.tuolumnecounty.ca.gov/DocumentCenter/View/14133/Health-Officer-Order---31720?bidId=">https://www.tuolumnecounty.ca.gov/DocumentCenter/View/14133/Health-Officer-Order---31720?bidId=</a>                                                                                                                                                                                                                                                                                                                                                                         |
| Tuolumn e | 19-Mar-20 | <a href="https://www.gov.ca.gov/wp-content/uploads/2020/03/3.19.20-attested-EO-N-33-20-COVID-19-HEALTH-ORDER.pdf">https://www.gov.ca.gov/wp-content/uploads/2020/03/3.19.20-attested-EO-N-33-20-COVID-19-HEALTH-ORDER.pdf</a>                                                                                                                                                                                                                                                                                                                                                         |

|           |           |                                                                                                                                                                                                                                                                                                                                                                                                                                                                                                                                                                                       |
|-----------|-----------|---------------------------------------------------------------------------------------------------------------------------------------------------------------------------------------------------------------------------------------------------------------------------------------------------------------------------------------------------------------------------------------------------------------------------------------------------------------------------------------------------------------------------------------------------------------------------------------|
| Tuolumn e | 26-Mar-20 | <a href="https://www.tuolumnecounty.ca.gov/DocumentCenter/View/14185/Health-Officer-Order-FRI-32620?bidId=">https://www.tuolumnecounty.ca.gov/DocumentCenter/View/14185/Health-Officer-Order-FRI-32620?bidId=</a>                                                                                                                                                                                                                                                                                                                                                                     |
| Tuolumn e | 3-Apr-20  | <a href="https://www.tuolumnecounty.ca.gov/DocumentCenter/View/14219/Short-Term-Lodging-HO-Order-040320?bidId=">https://www.tuolumnecounty.ca.gov/DocumentCenter/View/14219/Short-Term-Lodging-HO-Order-040320?bidId=</a>                                                                                                                                                                                                                                                                                                                                                             |
| Tuolumn e | 6-Apr-20  | <a href="https://www.tuolumnecounty.ca.gov/DocumentCenter/View/14286/Health-Officer-Order-Essential-vs-Non-Essential-040620?bidId=">https://www.tuolumnecounty.ca.gov/DocumentCenter/View/14286/Health-Officer-Order-Essential-vs-Non-Essential-040620?bidId=</a>                                                                                                                                                                                                                                                                                                                     |
| Tuolumn e | 30-Apr-20 | <a href="https://www.tuolumnecounty.ca.gov/DocumentCenter/View/14412/43020-Health-Officer-Order-Signed?bidId=">https://www.tuolumnecounty.ca.gov/DocumentCenter/View/14412/43020-Health-Officer-Order-Signed?bidId=</a>                                                                                                                                                                                                                                                                                                                                                               |
| Tuolumn e | 8-May-20  | <a href="https://www.tuolumnecounty.ca.gov/DocumentCenter/View/14437/HO-Order-5-8-20-Signed-with-Attachment?bidId=">https://www.tuolumnecounty.ca.gov/DocumentCenter/View/14437/HO-Order-5-8-20-Signed-with-Attachment?bidId=</a>                                                                                                                                                                                                                                                                                                                                                     |
| Tuolumn e | 11-May-20 | <a href="https://www.tuolumnecounty.ca.gov/DocumentCenter/View/14445/May-11-Local-Variance-Order-Final-Signed?bidId=">https://www.tuolumnecounty.ca.gov/DocumentCenter/View/14445/May-11-Local-Variance-Order-Final-Signed?bidId=</a>                                                                                                                                                                                                                                                                                                                                                 |
| Tuolumn e | 13-May-20 | <a href="https://www.tuolumnecounty.ca.gov/DocumentCenter/View/14446/Health-Officer-Order-FRI-Screening-Signed?bidId=">https://www.tuolumnecounty.ca.gov/DocumentCenter/View/14446/Health-Officer-Order-FRI-Screening-Signed?bidId=</a>                                                                                                                                                                                                                                                                                                                                               |
| Tuolumn e | 19-May-20 | <a href="https://www.tuolumnecounty.ca.gov/DocumentCenter/View/14456/FRI-Screening-Order-Update-51920-signed?bidId=">https://www.tuolumnecounty.ca.gov/DocumentCenter/View/14456/FRI-Screening-Order-Update-51920-signed?bidId=</a>                                                                                                                                                                                                                                                                                                                                                   |
| Tuolumn e | 29-May-20 | <a href="https://www.tuolumnecounty.ca.gov/DocumentCenter/View/14505/5292020-amended-health-officer-order-updated-stage-2-signed?bidId=">https://www.tuolumnecounty.ca.gov/DocumentCenter/View/14505/5292020-amended-health-officer-order-updated-stage-2-signed?bidId=</a>                                                                                                                                                                                                                                                                                                           |
| Tuolumn e | 5-Jun-20  | <a href="https://www.tuolumnecounty.ca.gov/DocumentCenter/View/14535/Signed-652020-HO-Order?bidId=">https://www.tuolumnecounty.ca.gov/DocumentCenter/View/14535/Signed-652020-HO-Order?bidId=</a>                                                                                                                                                                                                                                                                                                                                                                                     |
| Tuolumn e | 11-Jun-20 | <a href="https://www.tuolumnecounty.ca.gov/DocumentCenter/View/14595/Updated-Local-Health-Officer-Order-Signed-61120?bidId=">https://www.tuolumnecounty.ca.gov/DocumentCenter/View/14595/Updated-Local-Health-Officer-Order-Signed-61120?bidId=</a>                                                                                                                                                                                                                                                                                                                                   |
| Tuolumn e | 18-Jun-20 | <a href="https://www.cdph.ca.gov/Programs/CID/DCDC/CDPH%20Document%20Library/COVID-19/Guidance-for-Face-Coverings_06-18-2020.pdf">https://www.cdph.ca.gov/Programs/CID/DCDC/CDPH%20Document%20Library/COVID-19/Guidance-for-Face-Coverings_06-18-2020.pdf</a>                                                                                                                                                                                                                                                                                                                         |
| Tuolumn e | 18-Jun-20 | <a href="https://www.tuolumnecounty.ca.gov/DocumentCenter/View/14663/signed-HO-order-6182020?bidId=">https://www.tuolumnecounty.ca.gov/DocumentCenter/View/14663/signed-HO-order-6182020?bidId=</a>                                                                                                                                                                                                                                                                                                                                                                                   |
| Tuolumn e | 13-Jul-20 | <a href="https://www.tuolumnecounty.ca.gov/DocumentCenter/View/14892/7132020-Signed-HO-Order-Updating-Allowable-Sectors?bidId=">https://www.tuolumnecounty.ca.gov/DocumentCenter/View/14892/7132020-Signed-HO-Order-Updating-Allowable-Sectors?bidId=</a>                                                                                                                                                                                                                                                                                                                             |
| Tuolumn e | 13-Jul-20 | <a href="https://www.latimes.com/california/story/2020-07-13/newsom-california-county-rollback-reopening-coronavirus">https://www.latimes.com/california/story/2020-07-13/newsom-california-county-rollback-reopening-coronavirus</a>                                                                                                                                                                                                                                                                                                                                                 |
| Tuolumn e | 28-Aug-20 | <a href="https://projects.sfchronicle.com/2020/coronavirus-map/california-reopening/">https://projects.sfchronicle.com/2020/coronavirus-map/california-reopening/</a>                                                                                                                                                                                                                                                                                                                                                                                                                 |
| Tuolumn e | 31-Aug-20 | <a href="https://www.tuolumnecounty.ca.gov/DocumentCenter/View/15100/8312020-HO-Order-Blueprint?bidId=">https://www.tuolumnecounty.ca.gov/DocumentCenter/View/15100/8312020-HO-Order-Blueprint?bidId=</a>                                                                                                                                                                                                                                                                                                                                                                             |
| Tuolumn e | 22-Sep-20 | <a href="https://www.tuolumnecounty.ca.gov/DocumentCenter/View/15209/HOO-Revision-for-Health-Officer-Order-Lodging--Tuolumne?bidId=">https://www.tuolumnecounty.ca.gov/DocumentCenter/View/15209/HOO-Revision-for-Health-Officer-Order-Lodging--Tuolumne?bidId=</a>                                                                                                                                                                                                                                                                                                                   |
| Tuolumn e | 23-Sep-20 | <a href="https://www.tuolumnecounty.ca.gov/DocumentCenter/View/15210/92320-HOO-Revision-for-Health-Officer-Order---Tuolumne?bidId=">https://www.tuolumnecounty.ca.gov/DocumentCenter/View/15210/92320-HOO-Revision-for-Health-Officer-Order---Tuolumne?bidId=</a>                                                                                                                                                                                                                                                                                                                     |
| Tuolumn e | 9-Oct-20  | <a href="https://wp.sbcounty.gov/cao/countywire/?p=9160#:~:text=Private%20outdoor%20gatherings%20of%20three%20households%20now%20allowed%20throughout%20the%20county%2C%20state,-Published%20October%209&amp;text=Private%20outdoor%20gatherings%20of%20people,Gavin%20Newsom%20on%20Friday.">https://wp.sbcounty.gov/cao/countywire/?p=9160#:~:text=Private%20outdoor%20gatherings%20of%20three%20households%20now%20allowed%20throughout%20the%20county%2C%20state,-Published%20October%209&amp;text=Private%20outdoor%20gatherings%20of%20people,Gavin%20Newsom%20on%20Friday.</a> |
| Tuolumn e | 13-Nov-20 | <a href="https://www.cdph.ca.gov/Programs/CID/DCDC/Pages/COVID-19/Guidance-for-the-Prevention-of-COVID-19-Transmission-for-Gatherings-November-2020.aspx">https://www.cdph.ca.gov/Programs/CID/DCDC/Pages/COVID-19/Guidance-for-the-Prevention-of-COVID-19-Transmission-for-Gatherings-November-2020.aspx</a>                                                                                                                                                                                                                                                                         |
| Tuolumn e | 16-Nov-20 | <a href="https://www.cdph.ca.gov/Programs/CID/DCDC/Pages/COVID-19/guidance-for-face-coverings.aspx">https://www.cdph.ca.gov/Programs/CID/DCDC/Pages/COVID-19/guidance-for-face-coverings.aspx</a>                                                                                                                                                                                                                                                                                                                                                                                     |
| Tuolumn e | 17-Nov-20 | <a href="https://kmph.com/news/local/40-california-counties-in-purple-tier-including-the-central-valley">https://kmph.com/news/local/40-california-counties-in-purple-tier-including-the-central-valley</a>                                                                                                                                                                                                                                                                                                                                                                           |
| Tuolumn e | 19-Nov-20 | <a href="https://www.cdph.ca.gov/Programs/CID/DCDC/Pages/COVID-19/limited-stay-at-home-order.aspx">https://www.cdph.ca.gov/Programs/CID/DCDC/Pages/COVID-19/limited-stay-at-home-order.aspx</a>                                                                                                                                                                                                                                                                                                                                                                                       |
| Tuolumn e | 5-Dec-20  | <a href="https://www.gov.ca.gov/wp-content/uploads/2020/12/12.3.20-Stay-at-Home-Order-ICU-Scenario.pdf">https://www.gov.ca.gov/wp-content/uploads/2020/12/12.3.20-Stay-at-Home-Order-ICU-Scenario.pdf</a>                                                                                                                                                                                                                                                                                                                                                                             |
| Tuolumn e | 7-Dec-20  | <a href="https://www.tuolumnecounty.ca.gov/DocumentCenter/View/15478/120720-Revision-of-Health-Officer-Order---Tuolumne?bidId=">https://www.tuolumnecounty.ca.gov/DocumentCenter/View/15478/120720-Revision-of-Health-Officer-Order---Tuolumne?bidId=</a>                                                                                                                                                                                                                                                                                                                             |

|         |           |                                                                                                                                                                                                                                                                                                     |
|---------|-----------|-----------------------------------------------------------------------------------------------------------------------------------------------------------------------------------------------------------------------------------------------------------------------------------------------------|
| Ventura | 12-Mar-20 | <a href="https://vcportal.ventura.org/CEO/VCNC/2020-03-12_Public_Health_update_Local_Health_Emergency_Declaration2.pdf">https://vcportal.ventura.org/CEO/VCNC/2020-03-12_Public_Health_update_Local_Health_Emergency_Declaration2.pdf</a>                                                           |
| Ventura | 17-Mar-20 | <a href="https://vcportal.ventura.org/CEO/VCNC/2020-03-17_Ventura_County_Public_Health_Order.pdf">https://vcportal.ventura.org/CEO/VCNC/2020-03-17_Ventura_County_Public_Health_Order.pdf</a>                                                                                                       |
| Ventura | 19-Mar-20 | <a href="https://www.gov.ca.gov/wp-content/uploads/2020/03/3.19.20-attested-EO-N-33-20-COVID-19-HEALTH-ORDER.pdf">https://www.gov.ca.gov/wp-content/uploads/2020/03/3.19.20-attested-EO-N-33-20-COVID-19-HEALTH-ORDER.pdf</a>                                                                       |
| Ventura | 20-Mar-20 | <a href="https://www.vcemergency.com/wp-content/uploads/2020/03/StayWellAtHomeOrder.pdf">https://www.vcemergency.com/wp-content/uploads/2020/03/StayWellAtHomeOrder.pdf</a>                                                                                                                         |
| Ventura | 31-Mar-20 | <a href="https://vcportal.ventura.org/covid19/docs/March_31_2020_Order.pdf">https://vcportal.ventura.org/covid19/docs/March_31_2020_Order.pdf</a>                                                                                                                                                   |
| Ventura | 31-Mar-20 | <a href="https://vcportal.ventura.org/covid19/docs/2020-04-22_Eviction_Ordinance_4563.pdf">https://vcportal.ventura.org/covid19/docs/2020-04-22_Eviction_Ordinance_4563.pdf</a>                                                                                                                     |
| Ventura | 9-Apr-20  | <a href="https://vcportal.ventura.org/covid19/docs/2020-04-09_COVID19_PH_Order_April_9_2020.pdf">https://vcportal.ventura.org/covid19/docs/2020-04-09_COVID19_PH_Order_April_9_2020.pdf</a>                                                                                                         |
| Ventura | 17-Apr-20 | <a href="https://www.vcstar.com/story/news/special-reports/outdoors/2020/04/17/coronavirus-ventura-county-run-parks-reopen-time-weekend/5157753002/">https://www.vcstar.com/story/news/special-reports/outdoors/2020/04/17/coronavirus-ventura-county-run-parks-reopen-time-weekend/5157753002/</a> |
| Ventura | 20-Apr-20 | <a href="https://vcportal.ventura.org/CEO/VCNC/2020-04-18_Signed_15V8544-Final-Final_Master_Ord.pdf">https://vcportal.ventura.org/CEO/VCNC/2020-04-18_Signed_15V8544-Final-Final_Master_Ord.pdf</a>                                                                                                 |
| Ventura | 7-May-20  | <a href="https://vcportal.ventura.org/covid19/docs/2020-05-07_PublicHealthOrder.pdf">https://vcportal.ventura.org/covid19/docs/2020-05-07_PublicHealthOrder.pdf</a>                                                                                                                                 |
| Ventura | 12-May-20 | <a href="https://vcportal.ventura.org/covid19/docs/2020-05-12_VCE_MoreBusinessOpenings.pdf">https://vcportal.ventura.org/covid19/docs/2020-05-12_VCE_MoreBusinessOpenings.pdf</a>                                                                                                                   |
| Ventura | 20-May-20 | <a href="https://vcportal.ventura.org/CEO/VCNC/2020-05-20_VCPHOfficerOrder_ver20200507_amended_20200520.pdf">https://vcportal.ventura.org/CEO/VCNC/2020-05-20_VCPHOfficerOrder_ver20200507_amended_20200520.pdf</a>                                                                                 |
| Ventura | 26-May-20 | <a href="https://keyt.com/health/coronavirus/2020/05/26/ventura-county-announces-guidelines-for-barbershops-to-reopen/">https://keyt.com/health/coronavirus/2020/05/26/ventura-county-announces-guidelines-for-barbershops-to-reopen/</a>                                                           |
| Ventura | 29-May-20 | <a href="https://vcportal.ventura.org/CEO/VCNC/VC_Public_Health_Officer_Order_May-29-2020.pdf">https://vcportal.ventura.org/CEO/VCNC/VC_Public_Health_Officer_Order_May-29-2020.pdf</a>                                                                                                             |
| Ventura | 1-Jun-20  | <a href="https://vcportal.ventura.org/covid19/docs/LTCF_Visitation_Guidance.pdf">https://vcportal.ventura.org/covid19/docs/LTCF_Visitation_Guidance.pdf</a>                                                                                                                                         |
| Ventura | 11-Jun-20 | <a href="https://vcportal.ventura.org/CEO/VCNC/VC_Public_Health_Officer_Order_June-11-2020.pdf">https://vcportal.ventura.org/CEO/VCNC/VC_Public_Health_Officer_Order_June-11-2020.pdf</a>                                                                                                           |
| Ventura | 12-Jun-20 | <a href="https://keyt.com/health/coronavirus/2020/06/12/ventura-county-modifies-public-health-order-to-allow-more-businesses-to-reopen/">https://keyt.com/health/coronavirus/2020/06/12/ventura-county-modifies-public-health-order-to-allow-more-businesses-to-reopen/</a>                         |
| Ventura | 18-Jun-20 | <a href="https://vcportal.ventura.org/covid19/docs/pr/2020-06-18_NewsRelease_PHAdditionalReopeningGuidelines.pdf">https://vcportal.ventura.org/covid19/docs/pr/2020-06-18_NewsRelease_PHAdditionalReopeningGuidelines.pdf</a>                                                                       |
| Ventura | 18-Jun-20 | <a href="https://www.cdph.ca.gov/Programs/CID/DCDC/CDPH%20Document%20Library/COVID-19/Guidance-for-Face-Coverings_06-18-2020.pdf">https://www.cdph.ca.gov/Programs/CID/DCDC/CDPH%20Document%20Library/COVID-19/Guidance-for-Face-Coverings_06-18-2020.pdf</a>                                       |
| Ventura | 26-Jun-20 | <a href="https://vcportal.ventura.org/covid19/docs/pr/2020-06-18_NewsRelease_PHAdditionalReopeningGuidelines.pdf">https://vcportal.ventura.org/covid19/docs/pr/2020-06-18_NewsRelease_PHAdditionalReopeningGuidelines.pdf</a>                                                                       |
| Ventura | 29-Jun-20 | <a href="https://vcportal.ventura.org/covid19/docs/pr/2020-06-29_VCPH_BarsServingFoodRemainOpen.pdf">https://vcportal.ventura.org/covid19/docs/pr/2020-06-29_VCPH_BarsServingFoodRemainOpen.pdf</a>                                                                                                 |
| Ventura | 1-Jul-20  | <a href="https://vcportal.ventura.org/covid19/docs/2020-07-02_VC_Public_Health_Officer_Order_-_Bar_Closures.pdf">https://vcportal.ventura.org/covid19/docs/2020-07-02_VC_Public_Health_Officer_Order_-_Bar_Closures.pdf</a>                                                                         |
| Ventura | 2-Jul-20  | <a href="https://vcportal.ventura.org/covid19/docs/2020-07-02_VC_Public_Health_Officer_Order_-_Beach_Closures.pdf">https://vcportal.ventura.org/covid19/docs/2020-07-02_VC_Public_Health_Officer_Order_-_Beach_Closures.pdf</a>                                                                     |
| Ventura | 13-Jul-20 | <a href="https://www.latimes.com/california/story/2020-07-13/newsom-california-county-rollback-reopening-coronavirus">https://www.latimes.com/california/story/2020-07-13/newsom-california-county-rollback-reopening-coronavirus</a>                                                               |
| Ventura | 13-Jul-20 | <a href="https://vcportal.ventura.org/covid19/docs/2020-07-13_VC_Public_Health_Officer_Order.pdf">https://vcportal.ventura.org/covid19/docs/2020-07-13_VC_Public_Health_Officer_Order.pdf</a>                                                                                                       |
| Ventura | 16-Jul-20 | <a href="https://vcportal.ventura.org/covid19/docs/2020-07-16_VC_Public_Health_Officer_Order.pdf">https://vcportal.ventura.org/covid19/docs/2020-07-16_VC_Public_Health_Officer_Order.pdf</a>                                                                                                       |
| Ventura | 17-Jul-20 | <a href="https://www.cdph.ca.gov/Programs/CID/DCDC/CDPH%20Document%20Library/COVID-19/Schools%20Reopening%20Recommendations.pdf">https://www.cdph.ca.gov/Programs/CID/DCDC/CDPH%20Document%20Library/COVID-19/Schools%20Reopening%20Recommendations.pdf</a>                                         |
| Ventura | 7-Aug-20  | <a href="https://vcportal.ventura.org/covid19/docs/pr/2020-08-07_PressRelease_VCPH_TRO_for_PHOrderViolation.pdf">https://vcportal.ventura.org/covid19/docs/pr/2020-08-07_PressRelease_VCPH_TRO_for_PHOrderViolation.pdf</a>                                                                         |

|         |           |                                                                                                                                                                                                                                                                                                                                                                                                                                                                                                                                                                                       |
|---------|-----------|---------------------------------------------------------------------------------------------------------------------------------------------------------------------------------------------------------------------------------------------------------------------------------------------------------------------------------------------------------------------------------------------------------------------------------------------------------------------------------------------------------------------------------------------------------------------------------------|
| Ventura | 28-Aug-20 | <a href="https://abc7news.com/ca-reopening-phases-covid19cagov-gavin-newsom-update-california-salon-reopening/6393805/">https://abc7news.com/ca-reopening-phases-covid19cagov-gavin-newsom-update-california-salon-reopening/6393805/</a>                                                                                                                                                                                                                                                                                                                                             |
| Ventura | 31-Aug-20 | <a href="https://vcportal.ventura.org/covid19/docs/VenturaCounty_PublicHealthOrders_2020-08-31.pdf">https://vcportal.ventura.org/covid19/docs/VenturaCounty_PublicHealthOrders_2020-08-31.pdf</a>                                                                                                                                                                                                                                                                                                                                                                                     |
| Ventura | 18-Sep-20 | <a href="https://vcportal.ventura.org/covid19/docs/pr/2020-09-17_PubliHealthOrder_HomelessShelters.pdf">https://vcportal.ventura.org/covid19/docs/pr/2020-09-17_PubliHealthOrder_HomelessShelters.pdf</a>                                                                                                                                                                                                                                                                                                                                                                             |
| Ventura | 22-Sep-20 | <a href="https://files.covid19.ca.gov/pdf/guidance-expanded-personal-care-services--en.pdf">https://files.covid19.ca.gov/pdf/guidance-expanded-personal-care-services--en.pdf</a>                                                                                                                                                                                                                                                                                                                                                                                                     |
| Ventura | 22-Sep-20 | <a href="https://vcportal.ventura.org/covid19/docs/pr/2020-09-22_PubliHealthOrder_Amendment.pdf">https://vcportal.ventura.org/covid19/docs/pr/2020-09-22_PubliHealthOrder_Amendment.pdf</a>                                                                                                                                                                                                                                                                                                                                                                                           |
| Ventura | 6-Oct-20  | <a href="https://vcportal.ventura.org/CEO/VCNC/VC_Public_Health_Officer_Order_10-06-2020.pdf">https://vcportal.ventura.org/CEO/VCNC/VC_Public_Health_Officer_Order_10-06-2020.pdf</a>                                                                                                                                                                                                                                                                                                                                                                                                 |
| Ventura | 9-Oct-20  | <a href="https://wp.sbcounty.gov/cao/countywire/?p=9160#:~:text=Private%20outdoor%20gatherings%20of%20three%20households%20now%20allowed%20throughout%20the%20county%2C%20state,-Published%20October%209&amp;text=Private%20outdoor%20gatherings%20of%20people,Gavin%20Newsom%20on%20Friday.">https://wp.sbcounty.gov/cao/countywire/?p=9160#:~:text=Private%20outdoor%20gatherings%20of%20three%20households%20now%20allowed%20throughout%20the%20county%2C%20state,-Published%20October%209&amp;text=Private%20outdoor%20gatherings%20of%20people,Gavin%20Newsom%20on%20Friday.</a> |
| Ventura | 13-Nov-20 | <a href="https://www.cdph.ca.gov/Programs/CID/DCDC/Pages/COVID-19/Guidance-for-the-Prevention-of-COVID-19-Transmission-for-Gatherings-November-2020.aspx">https://www.cdph.ca.gov/Programs/CID/DCDC/Pages/COVID-19/Guidance-for-the-Prevention-of-COVID-19-Transmission-for-Gatherings-November-2020.aspx</a>                                                                                                                                                                                                                                                                         |
| Ventura | 16-Nov-20 | <a href="https://www.cdph.ca.gov/Programs/CID/DCDC/Pages/COVID-19/guidance-for-face-coverings.aspx">https://www.cdph.ca.gov/Programs/CID/DCDC/Pages/COVID-19/guidance-for-face-coverings.aspx</a>                                                                                                                                                                                                                                                                                                                                                                                     |
| Ventura | 17-Nov-20 | <a href="https://kmpb.com/news/local/40-california-counties-in-purple-tier-including-the-central-valley">https://kmpb.com/news/local/40-california-counties-in-purple-tier-including-the-central-valley</a>                                                                                                                                                                                                                                                                                                                                                                           |
| Ventura | 19-Nov-20 | <a href="https://www.cdph.ca.gov/Programs/CID/DCDC/Pages/COVID-19/limited-stay-at-home-order.aspx">https://www.cdph.ca.gov/Programs/CID/DCDC/Pages/COVID-19/limited-stay-at-home-order.aspx</a>                                                                                                                                                                                                                                                                                                                                                                                       |
| Ventura | 5-Dec-20  | <a href="https://www.gov.ca.gov/wp-content/uploads/2020/12/12.3.20-Stay-at-Home-Order-ICU-Scenario.pdf">https://www.gov.ca.gov/wp-content/uploads/2020/12/12.3.20-Stay-at-Home-Order-ICU-Scenario.pdf</a>                                                                                                                                                                                                                                                                                                                                                                             |
| Yolo    | 6-Mar-20  | <a href="https://www.capradio.org/articles/2020/03/06/yolo-county-reports-first-confirmed-coronavirus-case-declares-local-emergency/">https://www.capradio.org/articles/2020/03/06/yolo-county-reports-first-confirmed-coronavirus-case-declares-local-emergency/</a>                                                                                                                                                                                                                                                                                                                 |
| Yolo    | 18-Mar-20 | <a href="https://www.yolocounty.org/home/showdocument?id=62364">https://www.yolocounty.org/home/showdocument?id=62364</a>                                                                                                                                                                                                                                                                                                                                                                                                                                                             |
| Yolo    | 19-Mar-20 | <a href="https://www.gov.ca.gov/wp-content/uploads/2020/03/3.19.20-attested-EO-N-33-20-COVID-19-HEALTH-ORDER.pdf">https://www.gov.ca.gov/wp-content/uploads/2020/03/3.19.20-attested-EO-N-33-20-COVID-19-HEALTH-ORDER.pdf</a>                                                                                                                                                                                                                                                                                                                                                         |
| Yolo    | 24-Mar-20 | <a href="https://www.yolocounty.org/home/showdocument?id=64058">https://www.yolocounty.org/home/showdocument?id=64058</a>                                                                                                                                                                                                                                                                                                                                                                                                                                                             |
| Yolo    | 31-Mar-20 | <a href="https://www.yolocounty.org/Home/Components/News/News/10583/26">https://www.yolocounty.org/Home/Components/News/News/10583/26</a>                                                                                                                                                                                                                                                                                                                                                                                                                                             |
| Yolo    | 21-Apr-20 | <a href="https://www.yolocounty.org/home/showdocument?id=64058">https://www.yolocounty.org/home/showdocument?id=64058</a>                                                                                                                                                                                                                                                                                                                                                                                                                                                             |
| Yolo    | 24-Apr-20 | <a href="https://www.yolocounty.org/home/showdocument?id=64470">https://www.yolocounty.org/home/showdocument?id=64470</a>                                                                                                                                                                                                                                                                                                                                                                                                                                                             |
| Yolo    | 24-Apr-20 | <a href="https://www.yolocounty.org/home/showdocument?id=64118">https://www.yolocounty.org/home/showdocument?id=64118</a>                                                                                                                                                                                                                                                                                                                                                                                                                                                             |
| Yolo    | 30-Apr-20 | <a href="https://www.yolocounty.org/home/showdocument?id=64178">https://www.yolocounty.org/home/showdocument?id=64178</a>                                                                                                                                                                                                                                                                                                                                                                                                                                                             |
| Yolo    | 7-May-20  | <a href="https://www.yolocounty.org/health-human-services/adults/communicable-disease-investigation-and-control/novel-coronavirus-2019/roadmap-to-recovery">https://www.yolocounty.org/health-human-services/adults/communicable-disease-investigation-and-control/novel-coronavirus-2019/roadmap-to-recovery</a>                                                                                                                                                                                                                                                                     |
| Yolo    | 12-May-20 | <a href="https://www.yolocounty.org/health-human-services/adults/communicable-disease-investigation-and-control/novel-coronavirus-2019/roadmap-to-recovery">https://www.yolocounty.org/health-human-services/adults/communicable-disease-investigation-and-control/novel-coronavirus-2019/roadmap-to-recovery</a>                                                                                                                                                                                                                                                                     |
| Yolo    | 27-May-20 | <a href="https://www.yolocounty.org/health-human-services/adults/communicable-disease-investigation-and-control/novel-coronavirus-2019/roadmap-to-recovery">https://www.yolocounty.org/health-human-services/adults/communicable-disease-investigation-and-control/novel-coronavirus-2019/roadmap-to-recovery</a>                                                                                                                                                                                                                                                                     |
| Yolo    | 28-May-20 | <a href="https://www.yolocounty.org/home/showdocument?id=64638">https://www.yolocounty.org/home/showdocument?id=64638</a>                                                                                                                                                                                                                                                                                                                                                                                                                                                             |
| Yolo    | 28-May-20 | <a href="https://www.yolocounty.org/health-human-services/adults/communicable-disease-investigation-and-control/novel-coronavirus-2019/roadmap-to-recovery">https://www.yolocounty.org/health-human-services/adults/communicable-disease-investigation-and-control/novel-coronavirus-2019/roadmap-to-recovery</a>                                                                                                                                                                                                                                                                     |
| Yolo    | 29-May-20 | <a href="https://www.yolocounty.org/health-human-services/adults/communicable-disease-investigation-and-control/novel-coronavirus-2019/roadmap-to-recovery">https://www.yolocounty.org/health-human-services/adults/communicable-disease-investigation-and-control/novel-coronavirus-2019/roadmap-to-recovery</a>                                                                                                                                                                                                                                                                     |
| Yolo    | 12-Jun-20 | <a href="https://www.yolocounty.org/health-human-services/adults/communicable-disease-investigation-and-control/novel-coronavirus-2019/roadmap-to-recovery">https://www.yolocounty.org/health-human-services/adults/communicable-disease-investigation-and-control/novel-coronavirus-2019/roadmap-to-recovery</a>                                                                                                                                                                                                                                                                     |

|      |           |                                                                                                                                                                                                                                                                                                                                                                                                                                                                                                                                                                                       |
|------|-----------|---------------------------------------------------------------------------------------------------------------------------------------------------------------------------------------------------------------------------------------------------------------------------------------------------------------------------------------------------------------------------------------------------------------------------------------------------------------------------------------------------------------------------------------------------------------------------------------|
| Yolo | 18-Jun-20 | <a href="https://www.cdph.ca.gov/Programs/CID/DCDC/CDPH%20Document%20Library/COVID-19/Guidance-for-Face-Coverings_06-18-2020.pdf">https://www.cdph.ca.gov/Programs/CID/DCDC/CDPH%20Document%20Library/COVID-19/Guidance-for-Face-Coverings_06-18-2020.pdf</a>                                                                                                                                                                                                                                                                                                                         |
| Yolo | 18-Jun-20 | <a href="https://www.yolocounty.org/home/showdocument?id=64908">https://www.yolocounty.org/home/showdocument?id=64908</a>                                                                                                                                                                                                                                                                                                                                                                                                                                                             |
| Yolo | 19-Jun-20 | <a href="https://www.yolocounty.org/health-human-services/adults/communicable-disease-investigation-and-control/novel-coronavirus-2019/roadmap-to-recovery">https://www.yolocounty.org/health-human-services/adults/communicable-disease-investigation-and-control/novel-coronavirus-2019/roadmap-to-recovery</a>                                                                                                                                                                                                                                                                     |
| Yolo | 2-Jul-20  | <a href="https://www.yolocounty.org/Home/ShowDocument?id=65056">https://www.yolocounty.org/Home/ShowDocument?id=65056</a>                                                                                                                                                                                                                                                                                                                                                                                                                                                             |
| Yolo | 7-Jul-20  | <a href="https://www.yolocounty.org/Home/ShowDocument?id=65086">https://www.yolocounty.org/Home/ShowDocument?id=65086</a>                                                                                                                                                                                                                                                                                                                                                                                                                                                             |
| Yolo | 13-Jul-20 | <a href="https://www.latimes.com/california/story/2020-07-13/newsom-california-county-rollback-reopening-coronavirus">https://www.latimes.com/california/story/2020-07-13/newsom-california-county-rollback-reopening-coronavirus</a>                                                                                                                                                                                                                                                                                                                                                 |
| Yolo | 14-Jul-20 | <a href="https://www.yolocounty.org/health-human-services/adults/communicable-disease-investigation-and-control/novel-coronavirus-2019/roadmap-to-recovery">https://www.yolocounty.org/health-human-services/adults/communicable-disease-investigation-and-control/novel-coronavirus-2019/roadmap-to-recovery</a>                                                                                                                                                                                                                                                                     |
| Yolo | 17-Jul-20 | <a href="https://www.cdph.ca.gov/Programs/CID/DCDC/CDPH%20Document%20Library/COVID-19/Schools%20Reopening%20Recommendations.pdf">https://www.cdph.ca.gov/Programs/CID/DCDC/CDPH%20Document%20Library/COVID-19/Schools%20Reopening%20Recommendations.pdf</a>                                                                                                                                                                                                                                                                                                                           |
| Yolo | 24-Jul-20 | <a href="https://www.yolocounty.org/home/showdocument?id=65258">https://www.yolocounty.org/home/showdocument?id=65258</a>                                                                                                                                                                                                                                                                                                                                                                                                                                                             |
| Yolo | 24-Jul-20 | <a href="https://www.yolocounty.org/home/showdocument?id=65256">https://www.yolocounty.org/home/showdocument?id=65256</a>                                                                                                                                                                                                                                                                                                                                                                                                                                                             |
| Yolo | 28-Aug-20 | <a href="https://abc7news.com/ca-reopneing-phases-covid19cagov-gavin-newsom-update-california-salon-reopening/6393805/">https://abc7news.com/ca-reopneing-phases-covid19cagov-gavin-newsom-update-california-salon-reopening/6393805/</a>                                                                                                                                                                                                                                                                                                                                             |
| Yolo | 22-Sep-20 | <a href="https://files.covid19.ca.gov/pdf/guidance-expanded-personal-care-services--en.pdf">https://files.covid19.ca.gov/pdf/guidance-expanded-personal-care-services--en.pdf</a>                                                                                                                                                                                                                                                                                                                                                                                                     |
| Yolo | 29-Sep-20 | <a href="https://theaggie.org/2020/10/16/yolo-county-moves-down-into-red-tier-for-covid-19-some-indoor-services-including-dining-allowed/">https://theaggie.org/2020/10/16/yolo-county-moves-down-into-red-tier-for-covid-19-some-indoor-services-including-dining-allowed/</a>                                                                                                                                                                                                                                                                                                       |
| Yolo | 9-Oct-20  | <a href="https://wp.sbcounty.gov/cao/countywire/?p=9160#:~:text=Private%20outdoor%20gatherings%20of%20three%20households%20now%20allowed%20throughout%20the%20county%2C%20state,-Published%20October%209&amp;text=Private%20outdoor%20gatherings%20of%20people,Gavin%20Newsom%20on%20Friday.">https://wp.sbcounty.gov/cao/countywire/?p=9160#:~:text=Private%20outdoor%20gatherings%20of%20three%20households%20now%20allowed%20throughout%20the%20county%2C%20state,-Published%20October%209&amp;text=Private%20outdoor%20gatherings%20of%20people,Gavin%20Newsom%20on%20Friday.</a> |
| Yolo | 21-Oct-20 | <a href="https://www.yolocounty.org/Home/ShowDocument?id=66998">https://www.yolocounty.org/Home/ShowDocument?id=66998</a>                                                                                                                                                                                                                                                                                                                                                                                                                                                             |
| Yolo | 17-Nov-20 | <a href="https://www.yolocounty.org/Home/ShowDocument?id=67283">https://www.yolocounty.org/Home/ShowDocument?id=67283</a>                                                                                                                                                                                                                                                                                                                                                                                                                                                             |
| Yolo | 17-Nov-20 | <a href="https://kmpb.com/news/local/40-california-counties-in-purple-tier-including-the-central-valley">https://kmpb.com/news/local/40-california-counties-in-purple-tier-including-the-central-valley</a>                                                                                                                                                                                                                                                                                                                                                                           |
| Yolo | 19-Nov-20 | <a href="https://www.cdph.ca.gov/Programs/CID/DCDC/Pages/COVID-19/limited-stay-at-home-order.aspx">https://www.cdph.ca.gov/Programs/CID/DCDC/Pages/COVID-19/limited-stay-at-home-order.aspx</a>                                                                                                                                                                                                                                                                                                                                                                                       |
| Yolo | 9-Dec-20  | <a href="https://www.gov.ca.gov/wp-content/uploads/2020/12/12.3.20-Stay-at-Home-Order-ICU-Scenario.pdf">https://www.gov.ca.gov/wp-content/uploads/2020/12/12.3.20-Stay-at-Home-Order-ICU-Scenario.pdf</a>                                                                                                                                                                                                                                                                                                                                                                             |
| Yuba | 10-Mar-20 | <a href="https://www.appeal-democrat.com/news/yuba-sutter-counties-declare-state-of-emergency/article_b74377e8-635a-11ea-851c-2b94d91fc87d.html">https://www.appeal-democrat.com/news/yuba-sutter-counties-declare-state-of-emergency/article_b74377e8-635a-11ea-851c-2b94d91fc87d.html</a>                                                                                                                                                                                                                                                                                           |
| Yuba | 18-Mar-20 | <a href="https://sacramento.cbslocal.com/2020/03/18/coronavirus-yuba-sutter-counties-stay-home/">https://sacramento.cbslocal.com/2020/03/18/coronavirus-yuba-sutter-counties-stay-home/</a>                                                                                                                                                                                                                                                                                                                                                                                           |
| Yuba | 19-Mar-20 | <a href="https://www.gov.ca.gov/wp-content/uploads/2020/03/3.19.20-attested-EO-N-33-20-COVID-19-HEALTH-ORDER.pdf">https://www.gov.ca.gov/wp-content/uploads/2020/03/3.19.20-attested-EO-N-33-20-COVID-19-HEALTH-ORDER.pdf</a>                                                                                                                                                                                                                                                                                                                                                         |
| Yuba | 6-Apr-20  | <a href="https://www.suttercounty.org/assets/pdf/2020-04-06%20COVID-19%20PHO%20Order.pdf">https://www.suttercounty.org/assets/pdf/2020-04-06%20COVID-19%20PHO%20Order.pdf</a>                                                                                                                                                                                                                                                                                                                                                                                                         |
| Yuba | 4-May-20  | <a href="https://www.yuba.org/COVID%2019%20-%20Face%20Covering%20Order%20-%20Yuba-Sutter%20-%20FINAL_signed.pdf">https://www.yuba.org/COVID%2019%20-%20Face%20Covering%20Order%20-%20Yuba-Sutter%20-%20FINAL_signed.pdf</a>                                                                                                                                                                                                                                                                                                                                                           |
| Yuba | 4-May-20  | <a href="https://www.yuba.org/COVID%2019%20-%20Sutter%20Yuba%20Order%20-%20205-4-2020%20-%20FINAL_signed.pdf">https://www.yuba.org/COVID%2019%20-%20Sutter%20Yuba%20Order%20-%20205-4-2020%20-%20FINAL_signed.pdf</a>                                                                                                                                                                                                                                                                                                                                                                 |
| Yuba | 29-May-20 | <a href="https://www.suttercounty.org/assets/pdf/coronavirus/COVID%2019%20-%20Amendment%2020-001%20to%20PHO%20Order.pdf">https://www.suttercounty.org/assets/pdf/coronavirus/COVID%2019%20-%20Amendment%2020-001%20to%20PHO%20Order.pdf</a>                                                                                                                                                                                                                                                                                                                                           |
| Yuba | 11-Jun-20 | <a href="https://www.suttercounty.org/assets/pdf/coronavirus/2020-06-11_COVID-19_Amended_Order.pdf">https://www.suttercounty.org/assets/pdf/coronavirus/2020-06-11_COVID-19_Amended_Order.pdf</a>                                                                                                                                                                                                                                                                                                                                                                                     |
| Yuba | 18-Jun-20 | <a href="https://www.cdph.ca.gov/Programs/CID/DCDC/CDPH%20Document%20Library/COVID-19/Guidance-for-Face-Coverings_06-18-2020.pdf">https://www.cdph.ca.gov/Programs/CID/DCDC/CDPH%20Document%20Library/COVID-19/Guidance-for-Face-Coverings_06-18-2020.pdf</a>                                                                                                                                                                                                                                                                                                                         |

|      |           |                                                                                                                                                                                                                                                                                                                                                                                                                                                                                                                                                                                       |
|------|-----------|---------------------------------------------------------------------------------------------------------------------------------------------------------------------------------------------------------------------------------------------------------------------------------------------------------------------------------------------------------------------------------------------------------------------------------------------------------------------------------------------------------------------------------------------------------------------------------------|
| Yuba | 10-Jul-20 | <a href="https://www.suttercounty.org/assets/pdf/coronavirus/2020-07-10%20COVID-19%20-%20Amendment%2020-004%20to%20PHO%20Order.pdf">https://www.suttercounty.org/assets/pdf/coronavirus/2020-07-10%20COVID-19%20-%20Amendment%2020-004%20to%20PHO%20Order.pdf</a>                                                                                                                                                                                                                                                                                                                     |
| Yuba | 13-Jul-20 | <a href="https://covid19.ca.gov/roadmap-counties/">https://covid19.ca.gov/roadmap-counties/</a>                                                                                                                                                                                                                                                                                                                                                                                                                                                                                       |
| Yuba | 13-Jul-20 | <a href="https://www.latimes.com/california/story/2020-07-13/newsom-california-county-rollback-reopening-coronavirus">https://www.latimes.com/california/story/2020-07-13/newsom-california-county-rollback-reopening-coronavirus</a>                                                                                                                                                                                                                                                                                                                                                 |
| Yuba | 17-Jul-20 | <a href="https://www.cdph.ca.gov/Programs/CID/DCDC/CDPH%20Document%20Library/COVID-19/Schools%20Reopening%20Recommendations.pdf">https://www.cdph.ca.gov/Programs/CID/DCDC/CDPH%20Document%20Library/COVID-19/Schools%20Reopening%20Recommendations.pdf</a>                                                                                                                                                                                                                                                                                                                           |
| Yuba | 28-Aug-20 | <a href="https://abc7news.com/ca-reopneing-phases-covid19cagov-gavin-newsom-update-california-salon-reopening/6393805/">https://abc7news.com/ca-reopneing-phases-covid19cagov-gavin-newsom-update-california-salon-reopening/6393805/</a>                                                                                                                                                                                                                                                                                                                                             |
| Yuba | 22-Sep-20 | <a href="https://files.covid19.ca.gov/pdf/guidance-expanded-personal-care-services--en.pdf">https://files.covid19.ca.gov/pdf/guidance-expanded-personal-care-services--en.pdf</a>                                                                                                                                                                                                                                                                                                                                                                                                     |
| Yuba | 6-Oct-20  | <a href="https://yubanet.com/regional/yuba-county-moves-into-red-tier-issues-health-order-to-align-with-state/">https://yubanet.com/regional/yuba-county-moves-into-red-tier-issues-health-order-to-align-with-state/</a>                                                                                                                                                                                                                                                                                                                                                             |
| Yuba | 6-Oct-20  | <a href="https://www.suttercounty.org/assets/pdf/coronavirus/2020-10-06%20Yuba-Sutter%20Order%20Terminating%20Prior%20Orders.pdf">https://www.suttercounty.org/assets/pdf/coronavirus/2020-10-06%20Yuba-Sutter%20Order%20Terminating%20Prior%20Orders.pdf</a>                                                                                                                                                                                                                                                                                                                         |
| Yuba | 9-Oct-20  | <a href="https://wp.sbcounty.gov/cao/countywire/?p=9160#:~:text=Private%20outdoor%20gatherings%20of%20three%20households%20now%20allowed%20throughout%20the%20county%2C%20state,-Published%20October%209&amp;text=Private%20outdoor%20gatherings%20of%20people,Gavin%20Newsom%20on%20Friday.">https://wp.sbcounty.gov/cao/countywire/?p=9160#:~:text=Private%20outdoor%20gatherings%20of%20three%20households%20now%20allowed%20throughout%20the%20county%2C%20state,-Published%20October%209&amp;text=Private%20outdoor%20gatherings%20of%20people,Gavin%20Newsom%20on%20Friday.</a> |
| Yuba | 13-Nov-20 | <a href="https://www.cdph.ca.gov/Programs/CID/DCDC/Pages/COVID-19/Guidance-for-the-Prevention-of-COVID-19-Transmission-for-Gatherings-November-2020.aspx">https://www.cdph.ca.gov/Programs/CID/DCDC/Pages/COVID-19/Guidance-for-the-Prevention-of-COVID-19-Transmission-for-Gatherings-November-2020.aspx</a>                                                                                                                                                                                                                                                                         |
| Yuba | 16-Nov-20 | <a href="https://www.cdph.ca.gov/Programs/CID/DCDC/Pages/COVID-19/guidance-for-face-coverings.aspx">https://www.cdph.ca.gov/Programs/CID/DCDC/Pages/COVID-19/guidance-for-face-coverings.aspx</a>                                                                                                                                                                                                                                                                                                                                                                                     |
| Yuba | 17-Nov-20 | <a href="https://kmp.com/news/local/40-california-counties-in-purple-tier-including-the-central-valley">https://kmp.com/news/local/40-california-counties-in-purple-tier-including-the-central-valley</a>                                                                                                                                                                                                                                                                                                                                                                             |
| Yuba | 19-Nov-20 | <a href="https://www.cdph.ca.gov/Programs/CID/DCDC/Pages/COVID-19/limited-stay-at-home-order.aspx">https://www.cdph.ca.gov/Programs/CID/DCDC/Pages/COVID-19/limited-stay-at-home-order.aspx</a>                                                                                                                                                                                                                                                                                                                                                                                       |
| Yuba | 5-Dec-20  | <a href="https://www.suttercounty.org/assets/pdf/coronavirus/2020-12-04%20Public%20Health%20Advisory%20to%20Mitigate%20Risks%20in%20Yuba-Sutter.pdf">https://www.suttercounty.org/assets/pdf/coronavirus/2020-12-04%20Public%20Health%20Advisory%20to%20Mitigate%20Risks%20in%20Yuba-Sutter.pdf</a>                                                                                                                                                                                                                                                                                   |
| Yuba | 9-Dec-20  | <a href="https://www.gov.ca.gov/wp-content/uploads/2020/12/12.3.20-Stay-at-Home-Order-ICU-Scenario.pdf">https://www.gov.ca.gov/wp-content/uploads/2020/12/12.3.20-Stay-at-Home-Order-ICU-Scenario.pdf</a>                                                                                                                                                                                                                                                                                                                                                                             |

Appendix Table 4: List of topics covered with definition

| Topic                                | Description                                                                                                                                                                                                                                                                                                                                                    |
|--------------------------------------|----------------------------------------------------------------------------------------------------------------------------------------------------------------------------------------------------------------------------------------------------------------------------------------------------------------------------------------------------------------|
| State of Emergency                   | Binary variable for if state of emergency declared                                                                                                                                                                                                                                                                                                             |
| Moratorium on Gatherings             | Ordinal variable of 1-10 signifying the stricture of moratoriums on organized or public gatherings. (Restrictions on private gatherings are covered with the “Social bubbles” variable.) Note - restrictions on gatherings were rolled into reopening orders, therefore this variable is set to missing once a county reached an initial reopening level of 5. |
| Physical Distance Closures           | Ordinal variable of 1-10 signifying the stricture of physical distance closures                                                                                                                                                                                                                                                                                |
| Stay at Home orders                  | Ordinal variable with values of 3, 5, and 10 signifying the stricture of stay-at-home orders                                                                                                                                                                                                                                                                   |
| Quarantine for residents             | Ordinal variable of 1-10 signifying the stricture of quarantine for residents                                                                                                                                                                                                                                                                                  |
| Quarantine for out-of-state visitors | Ordinal variable of 1-8 signifying the stricture of quarantine for out-of-state visitors                                                                                                                                                                                                                                                                       |
| Reopening                            | Ordinal variable of -1 to -9 signifying the stricture of reopening variables, with -1 being the lowest level of reopening and -9 being the most reopening                                                                                                                                                                                                      |
| Second closures                      | Ordinal variable of 1-10 signifying the stricture of second closures                                                                                                                                                                                                                                                                                           |
| Overall closure                      | Prior to the introduction of the state tier system, a composite variable of physical distance closures, reopening, and second closures. Beginning on 31 August this variable represented the tier assigned by the state.                                                                                                                                       |
| Lab reporting and Contact tracing    | Ordinal variable of 1-9 signifying the stricture of lab reporting and contact tracing requirements                                                                                                                                                                                                                                                             |
| Face masks                           | Ordinal variable of 1-10 signifying the stricture of face mask orders                                                                                                                                                                                                                                                                                          |
| Social bubbles                       | Ordinal variable of 2-9 signifying the number of individuals and external households a household can interact with. This variable was added in the November 30th data release and all orders from previous months were reviewed and backcoded to reflect this new variable.                                                                                    |
| Alcohol and Firearms                 | Binary variable signifying if the order related to alcohol or firearms                                                                                                                                                                                                                                                                                         |
| Housing                              | Binary variable signifying if the order related to housing                                                                                                                                                                                                                                                                                                     |
| Unemployment programs                | Binary variable signifying if the order related to unemployment programs                                                                                                                                                                                                                                                                                       |



|                                 |                                                                                    |
|---------------------------------|------------------------------------------------------------------------------------|
| Food security                   | Binary variable signifying if the order related to food security                   |
| Healthcare delivery             | Binary variable signifying if the order related to healthcare delivery             |
| Racial disparities              | Binary variable signifying if the order related to racial disparities              |
| Incarcerated individuals        | Binary variable signifying if the order related to incarcerated individuals        |
| Substance use disorder policies | Binary variable signifying if the order related to substance use disorder policies |

Appendix Table 5. Descriptions of value definitions for each ordinal public health order category

| Topic                    | Value | Description                                                                                                                                                                                                                  |
|--------------------------|-------|------------------------------------------------------------------------------------------------------------------------------------------------------------------------------------------------------------------------------|
| Moratorium on Gatherings | 1     | Gatherings of >250 people should be canceled                                                                                                                                                                                 |
| Moratorium on Gatherings | 2     | Gatherings of >50 people should be canceled                                                                                                                                                                                  |
| Moratorium on Gatherings | 3     | Gatherings of 1000 or more                                                                                                                                                                                                   |
| Moratorium on Gatherings | 4     | Specific gatherings (city-owned buildings or school-related, eg) cancelled                                                                                                                                                   |
| Moratorium on Gatherings | 5     | Gatherings of 500 or more                                                                                                                                                                                                    |
| Moratorium on Gatherings | 6     | Gatherings of 250 or more                                                                                                                                                                                                    |
| Moratorium on Gatherings | 7     | Gatherings of 100 or more                                                                                                                                                                                                    |
| Moratorium on Gatherings | 8     | Gatherings of 50 or more                                                                                                                                                                                                     |
| Moratorium on Gatherings | 9     | Gatherings of 25 or more                                                                                                                                                                                                     |
| Moratorium on Gatherings | 10    | Gatherings of 10 or more                                                                                                                                                                                                     |
| Stay at Home             | 3     | Applies to those >75 yo or >70 yo with co-morbidities                                                                                                                                                                        |
| Stay at Home             | 5     | Exemption for religious gatherings                                                                                                                                                                                           |
| Stay at Home             | 10    | All except essential workers must stay at home                                                                                                                                                                               |
| Quarantine for residents | 1     | People with symptoms urged to self-isolate                                                                                                                                                                                   |
| Quarantine for residents | 2     | People should not return to work until 24 hours symptom-free                                                                                                                                                                 |
| Quarantine for residents | 3     | If you have symptoms, isolate for 7 days or until 3 days fever-free                                                                                                                                                          |
| Quarantine for residents | 4     | If you are positive, isolate for 10 days and at least 1 day fever-free                                                                                                                                                       |
| Quarantine for residents | 5     | If you have been exposed, you must quarantine for 14 days                                                                                                                                                                    |
| Quarantine for residents | 6     | Stay home if sick, quarantine for 14 days if exposed                                                                                                                                                                         |
| Quarantine for residents | 7     | If you have been exposed, quarantine for 14 days; sick must isolate for 7 days from beg of symptoms and 3 days fever-free                                                                                                    |
| Quarantine for residents | 8     | If you have had any exposure to an individual with a positive test, quarantine for 14 days; positive tests must isolate for 10 days; symptomatic must isolate for at least 10 days from beg of symptoms and 1 day fever-free |

|                                      |    |                                                                                                                                                                                                                               |
|--------------------------------------|----|-------------------------------------------------------------------------------------------------------------------------------------------------------------------------------------------------------------------------------|
| Quarantine for residents             | 9  | If you have had any exposure to an individual with a positive test, quarantine for 14 days; positive tests must isolate for 10 days; symptomatic must isolate for at least 10 days from beg of symptoms and 3 days fever-free |
| Quarantine for residents             | 10 | Failure to comply with isolation can result in fine/misdemeanor                                                                                                                                                               |
| Quarantine for out-of-state visitors | 1  | Exclude from events anyone from out-of-state with symptoms                                                                                                                                                                    |
| Quarantine for out-of-state visitors | 2  | Exclude from events anyone who traveled from China                                                                                                                                                                            |
| Quarantine for out-of-state visitors | 3  | Exclude from events anyone with symptoms who traveled from European or US hotspots                                                                                                                                            |
| Quarantine for out-of-state visitors | 5  | Require 14-day quarantine anyone who traveled from hotspots out of county                                                                                                                                                     |
| Quarantine for out-of-state visitors | 6  | No people may disembark from a cruise ship in which anyone has been diagnosed with Covid without permission                                                                                                                   |
| Quarantine for out-of-state visitors | 7  | Require 14-day quarantine for travelers coming from certain states                                                                                                                                                            |
| Quarantine for out-of-state visitors | 8  | Require 14-day quarantine anyone coming from out of state                                                                                                                                                                     |
| Lab reporting and Contact tracing    | 1  | Mandate reporting of positive tests                                                                                                                                                                                           |
| Lab reporting and Contact tracing    | 2  | Mandate reporting of all lab results                                                                                                                                                                                          |
| Lab reporting and Contact tracing    | 3  | Allows those who "meet criteria" but without a doctor's order to be tested by the County/ requires testing for all decedents                                                                                                  |
| Lab reporting and Contact tracing    | 4  | Require healthcare facilities to test any symptomatic, exposed or at-risk persons                                                                                                                                             |
| Lab reporting and Contact tracing    | 5  | Funds provided for contact tracing                                                                                                                                                                                            |
| Lab reporting and Contact tracing    | 6  | Public awareness for contact tracing provided                                                                                                                                                                                 |
| Lab reporting and Contact tracing    | 7  | Businesses must req reporting of pos tests by personnel and then must participate in contact tracing OR facilities must report all febrile resp infections                                                                    |

|                                   |    |                                                                                                                                                              |
|-----------------------------------|----|--------------------------------------------------------------------------------------------------------------------------------------------------------------|
| Lab reporting and Contact tracing | 8  | Residents and personnel of Residential Facilities must submit to testing                                                                                     |
| Lab reporting and Contact tracing | 9  | Business forced to test all employees to remain open                                                                                                         |
| Face masks                        | 1  | Face coverings suggested for essential businesses                                                                                                            |
| Face masks                        | 2  | Allow businesses to require face coverings                                                                                                                   |
| Face masks                        | 3  | Face coverings required for those in public facing essential businesses                                                                                      |
| Face masks                        | 4  | Face coverings required for those in public facing essential businesses and those who visit                                                                  |
| Face masks                        | 5  | Masks also required for those in nursing homes plus residents when not in their rooms                                                                        |
| Face masks                        | 6  | Masks required when using public outdoor spaces, visiting businesses, riding public transportation, for those over 12 yo                                     |
| Face masks                        | 7  | Masks required for all people in public places                                                                                                               |
| Face masks                        | 8  | Mask mandate for anyone leaving their homes with possible contact with non-household members, includes exercise when one could come within 30 feet of others |
| Face masks                        | 9  | Masks required for all individuals when in public spaces, potentially enforceable.                                                                           |
| Face masks                        | 10 | Mask mandate for all public places, specifically enforced with fines, charges                                                                                |
| Closures                          | 1  | Lowest closure, e.g., gathering restrictions or wineries closed (Yellow tier post 8/31)                                                                      |
| Closures                          | 2  | Select recreation areas closed, e.g., beaches on weekends (Orange tier post 8/31)                                                                            |
| Closures                          | 3  | Indoor dining closed (Red tier post 8/31)                                                                                                                    |
| Closures                          | 4  | Nail and hair salons closed (Purple tier post 9/22)                                                                                                          |
| Closures                          | 5  | Indoor malls closed (Purple tier from 8/31 to 9/22)                                                                                                          |
| Closures                          | 6  | Places of worship closed (Stricter than purple tier post 8/31)                                                                                               |
| Closures                          | 7  | Strict closures, e.g., schools closed                                                                                                                        |
| Closures                          | 8  | Strict closures, e.g., day camps closed                                                                                                                      |
| Closures                          | 9  | Hotels closed                                                                                                                                                |
| Closures                          | 10 | Strictest closure, e.g., all businesses and recreation areas closed                                                                                          |
| Social bubbles                    | 2  | Gatherings of greater than 3 households are not allowed, must be outside in purple tier                                                                      |
| Social bubbles                    | 3  | Gatherings of greater than 3 households are not allowed, must be outside for all                                                                             |
| Social bubbles                    | 4  | Gatherings can only include 3 households, must be outside, must report ill participants                                                                      |
| Social bubbles                    | 5  | Gatherings can include 3 households, only 25 people                                                                                                          |
| Social bubbles                    | 6  | Gatherings must be outside & limited to 3 hhds & 25 ppl; "meal" gatherings should be limited to 3 hhds & 6 ppl                                               |

|                |   |                                                                        |
|----------------|---|------------------------------------------------------------------------|
| Social bubbles | 7 | Gatherings shall be outside & limited to 3 hnds & 16 people            |
| Social bubbles | 8 | Households may not interact with other households between 10pm and 5am |
| Social bubbles | 9 | No gatherings of households allowed                                    |
